# Supplementary material for: Dissection of the E8 locus in two early maturing Canadian soybean populations
Source: Front Plant Sci. 2024 Feb 8;15:1329065. doi: 10.3389/fpls.2024.1329065 (PMC10881665; doi:10.3389/fpls.2024.1329065)
Supplement: Supplementary Table S1 — Quantile–quantile (Q-Q) plots of phenotypic traits. [file Table_1.xlsx]

## Sheet: a. Phenotypes
QS15524
Year	Phenotypes	QS15524p01_1_BC01	QS15524p01_1_BC02	QS15524p01_1_BC03	QS15524p01_1_BC04	QS15524p01_1_BC05	QS15524p01_1_BC06	QS15524p01_1_BC07	QS15524p01_1_BC08	QS15524p01_1_BC09	QS15524p01_1_BC10	QS15524p01_1_BC11	QS15524p01_1_BC12	QS15524p01_1_BC13	QS15524p01_1_BC14	QS15524p01_1_BC15	QS15524p01_1_BC16	QS15524p01_1_BC17	QS15524p01_1_BC18	QS15524p01_1_BC19	QS15524p01_1_BC20	QS15524p01_1_BC21	QS15524p01_1_BC22	QS15524p01_1_BC24	QS15524p01_1_BC25	QS15524p01_1_BC26	QS15524p01_1_BC27	QS15524p01_1_BC29	QS15524p01_1_BC30	QS15524p01_1_BC31	QS15524p01_1_BC32	QS15524p01_1_BC34	QS15524p01_1_BC35	QS15524p01_1_BC36	QS15524p01_1_BC37	QS15524p01_1_BC38	QS15524p01_1_BC39	QS15524p01_1_BC40	QS15524p01_1_BC41	QS15524p01_1_BC42	QS15524p01_1_BC43	QS15524p01_1_BC44	QS15524p01_1_BC45	QS15524p01_1_BC46	QS15524p01_1_BC47	QS15524p01_1_BC48	QS15524p01_1_BC49	QS15524p01_1_BC50	QS15524p01_1_BC51
2018	Maturity (field)	93	98	96	91	100	90	94	88	100	NA	88	93	91	91	87	93	98	102	NA	98	90	101	96	92	99	99	107	101	89	101	92	95	91	99	NA	89	93	97	91	100	91	90	94	91	98	96	107	91
2018	Flowering (field)	33	35	33	34	34	33	36	32	36	NA	34	33	35	33	32	33	35	36	NA	40	33	33	34	35	40	34	35	38	33	34	33	33	33	40	NA	34	38	34	37	36	34	33	35	34	34	34	36	35
2018	Pod filling (field)	60	63	63	57	66	57	58	56	64	NA	54	60	56	58	55	60	63	66	NA	58	57	68	62	57	59	65	72	63	56	67	59	62	58	59	NA	55	55	63	54	64	57	57	59	57	64	62	71	56
2021	Maturity (field)	107	110	110	96	107	105	108	100	108	NA	91	101	101	101	96	105	101	117	NA	108	100	107	105	103	101	105	112	108	108	110	105	106	100	105	NA	95	97	105	100	110	105	100	100	100	108	105	114	98
2021	Flowering (field)	35	36	36	35	35	35	35	35	37	NA	35	35	35	35	35	35	35	35	NA	36	35	35	35	35	35	36	36	36	35	36	35	35	35	36	NA	35	35	35	35	36	35	36	35	35	36	36	36	35
2021	Pod filling (field)	71	75	75	61	71	71	73	64	72	NA	56	66	66	67	61	71	67	81	NA	74	66	73	71	68	67	70	77	73	72	75	71	72	66	70	NA	61	63	71	64	73	71	65	64	66	73	70	77	64
Average	Maturity (field)	100	104	103	93.5	103.5	97.5	101	94	104	NA	89.5	97	96	96	91.5	99	99.5	109.5	NA	103	95	104	100.5	97.5	100	102	109.5	104.5	98.5	105.5	98.5	100.5	95.5	102	NA	92	95	101	95.5	105	98	95	97	95.5	103	100.5	110.5	94.5
Average	Flowering (field)	34	35.5	34.5	34.5	34.5	34	35.5	33.5	36.5	NA	34.5	34	35	34	33.5	34	35	35.5	NA	38	34	34	34.5	35	37.5	35	35.5	37	34	35	34	34	34	38	NA	34.5	36.5	34.5	36	36	34.5	34.5	35	34.5	35	35	36	35
Average	Pod filling (field)	65.5	69	69	59	68.5	64	65.5	60	68	NA	55	63	61	62.5	58	65.5	65	73.5	NA	66	61.5	70.5	66.5	62.5	63	67.5	74.5	68	64	71	65	67	62	64.5	NA	58	59	67	59	68.5	64	61	61.5	61.5	68.5	66	74	60
2017-2018	Maturity (greenhouse)	99	97	94	85	90	87	84	84	90	84	84	86	87	84	86	94	97	107	87	83	90	90	92	82	87	92	99	103	87	95	87	87	87	87	87	89	85	96	85	96	85	85	88	81	96	87	94	85
QS15544
Year	Phenotypes	QS15544.10002	QS15544.10005	QS15544.10009	QS15544.10010	QS15544.10012	QS15544.10014	QS15544.10021	QS15544.10022	QS15544.10023	QS15544.10025	QS15544.10030	QS15544.10031	QS15544.10033	QS15544.10034	QS15544.10035	QS15544.10036	QS15544.10037	QS15544.10039	QS15544.10040	QS15544.10042	QS15544.10047	QS15544.10048	QS15544.10051	QS15544.10053	QS15544.10056	QS15544.10057	QS15544.10058	QS15544.10059	QS15544.10060	QS15544.10063	QS15544.10064	QS15544.10065	QS15544.10066	QS15544.10068	QS15544.10071	QS15544.10073	QS15544.10075	QS15544.10076	QS15544.10077	QS15544.10084	QS15544.10087	QS15544.10088	QS15544.10089	QS15544.10092	QS15544.10096	QS15544.10098	QS15544.10100	QS15544.10103
2020	Flowering (field)	43	44	42	43	43	45	45	42	43	46	45	49	45	44	41	46	43	42	43	41	42	46	43	42	46	42	41	43	45	45	43	44	44	43	46	41	41	42	43	46	43	44	41	42	43	43	42	42
2021	Flowering (field)	40	36	34	41	34	40	39	39	38	41	41	38	42	40	37	39	41	34	39	38	43	37	38	37	40	38	32	32	37	40	39	44	40	39	41	38	40	41	42	39	41	42	38	32	36	39	41	30
Average	Flowering (field)	41.5	40	38	42	38.5	42.5	42	40.5	40.5	43.5	43	43.5	43.5	42	39	42.5	42	38	41	39.5	42.5	41.5	40.5	39.5	43	40	36.5	37.5	41	42.5	41	44	42	41	43.5	39.5	40.5	41.5	42.5	42.5	42	43	39.5	37	39.5	41	41.5	36
2020	Maturity (field)	122	118	110	118	118	116	123	121	111	120	134	121	123	108	109	119	109	111	119	110	118	120	122	115	112	113	109	108	116	114	106	122	117	113	120	111	119	121	119	117	110	119	111	114	114	113	113	112
2021	Maturity (field)	102	100	98	98	96	104	108	107	109	98	109	102	107	102	98	102	100	94	107	98	107	102	102	104	98	98	94	98	102	102	96	107	100	100	105	102	107	109	104	105	102	108	100	98	107	98	100	98
2022	Maturity (field)	103	99	100	104	100	106	115	115	112	107	122	105	111	101	96	111	104	100	115	100	112	103	104	103	104	103	94	96	105	107	102	112	101	100	107	104	114	118	113	104	104	117	99	101	106	103	102	101
Average	Maturity (field)	109	105.7	102.7	106.7	104.7	108.7	115.3	114.3	110.7	108.3	121.7	109.3	113.7	103.7	101	110.7	104.3	101.7	113.7	102.7	112.3	108.3	109.3	107.3	104.7	104.7	99	100.7	107.7	107.7	101.3	113.7	106	104.3	110.7	105.7	113.3	116	112	108.7	105.3	114.7	103.3	104.3	109	104.7	105	103.7
2020	Pod filling (field)	79	74	68	75	75	71	78	79	68	74	89	72	78	64	68	73	66	69	76	69	76	74	79	73	66	71	68	65	71	69	63	78	73	70	74	70	78	79	76	71	67	75	70	73	72	71	72	71
2021	Pod filling (field)	62	64	64	57	62	64	69	68	71	57	68	64	65	62	61	63	59	60	68	60	64	65	64	67	58	60	62	66	65	62	57	63	60	61	64	64	67	68	62	66	61	66	62	66	71	59	59	68
Average	Pod filling (field)	70.5	69	66	66	68.5	67.5	73.5	73.5	69.5	65.5	78.5	68	71.5	63	64.5	68	62.5	64.5	72	64.5	70	69.5	71.5	70	62	65.5	65	65.5	68	65.5	60	70.5	66.5	65.5	69	67	72.5	73.5	69	68.5	64	70.5	66	69.5	71.5	65	65.5	69.5
2019-2020	Maturity (greenhouse)	87	88	87	87	91	83	82	92	84	82	110	NA	97.4023	86.1241	84.0736	82.023	78.9471	82.023	93.3011	89.2	89.2	85.0989	93.3011	83.0483	84.0736	86.1241	86.1241	86.1241	96.377	83.7614	89.9659	86.8636	89.9659	86.8636	94.1023	89.9659	94.1023	86.8636	89.9659	89.9659	94.1023	85.8295	86.8636	84.7955	98.2386	84.7955	86.8636	82.7273
[truncated: 128 more columns]

## Sheet: b. Descriptive statistics 
Population	Year	TraitName	SampleSize	Mean	Variance	StdError	Skewness	Kurtosis	Minimum	Maximum	Range	Heritability
QS15524	2018	Flowering (field)	171	34.3099	2.7093	1.646	1.3463	1.8885	32	40	8	0.275559
	2021	Flowering (field)	171	35.3684	0.4458	0.6677	3.9377	27.8813	35	41	6	0.301828
	Average	Flowering (field)	171	34.8392	0.8137	0.902	1.1801	1.5158	33.5	38	4.5	0.415963
	2018	Pod-filling (field)	171	59.7251	15.6946	3.9616	0.4511	-0.3102	52	72	20	0.851992
	2021	Pod-filling (field)	171	69.1053	19.4594	4.4113	-0.4978	0.6548	56	81	25	0.643596
	Average	Pod-filling (field)	171	64.4152	14.4913	3.8067	-0.1016	0.1132	54	74.5	20.5	0.794387
	2018	Maturity (field)	171	94.0351	19.6105	4.4284	0.3834	-0.3281	85	107	22	0.829659
	2021	Maturity (field)	171	104.006	20.8294	4.5639	-0.3747	0.5652	91	117	26	0.681133
	Average	Maturity (field)	171	99.0205	17.1922	4.1464	-0.0075	0.1584	88	110.5	22.5	0.802719
	2017-2018	Maturity (greenhouse)	176	89.9257	27.4594	5.2402	0.7659	0.6329	79.5	107.35	27.85	0.596724
QS15544	2020	Flowering (field)	162	43.1481	3.1829	1.7841	0.3223	-0.1879	39	49	10	0.238646
	2021	Flowering (field)	162	38.679	8.182	2.8604	-0.7257	0.4476	30	44	14	0.4777
	Average	Flowering (field)	162	40.9136	3.7006	1.9237	-0.3982	-0.1803	35	44.5	9.5	0.559387
	2020	Pod-filling (field)	162	71.2531	20.4635	4.5237	0.4719	0.5206	61	89	28	0.662641
	2021	Pod-filling (field)	162	62.3951	12.9982	3.6053	0.1106	-0.5904	55	71	16	0.448796
	Average	Pod-filling (field)	162	66.8241	12.5822	3.5471	0.2641	0.1511	58	78.5	20.5	0.768082
	2020	Maturity (field)	162	114.265	25.3639	5.0363	0.512	0.2569	104	134	30	0.679376
	2021	Maturity (field)	162	101.074	16.4417	4.0548	0.1542	-0.8411	94	109	15	0.736263
	2022	Maturity (field)	161	104.106	43.095	6.5647	0.6329	0.122	89	122	33	0.803161
	Average	Maturity (field)	162	106.481	23.2248	4.8192	0.489	-0.0953	96.3333	121.667	25.3333	0.837793
	2019-2020	Maturity (greenhouse)	161	86.4553	27.2011	5.2155	0.9958	2.624	75.9149	110	34.0851	0.29831

## Sheet: c. Pearson correlation
Population	Pairwise comparison	Phenotype	Pearson correlation coefficient
QS15524	2018 X 2021	Maturity (field)	0.700839
QS15524	2018 X 2021	Flowering (field)	0.0453543
QS15524	2018 X 2021	Pod filling (field)	0.652645
QS15524	2018 X Average	Maturity (field)	0.919719
QS15524	2018 X Average	Flowering (field)	0.929143
QS15524	2018 X Average	Pod filling (field)	0.89849
QS15524	2021 X Average	Maturity (field)	0.924608
QS15524	2021 X Average	Flowering (field)	0.41148
QS15524	2021 X Average	Pod filling (field)	0.919005
QS15544	2020 X 2021	Flowering (field)	0.336781
QS15544	2020 X 2021	Maturity (field)	0.743295
QS15544	2020 X 2021	Pod filling (field)	0.517105
QS15544	2020 X 2022	Maturity (field)	0.768611
QS15544	2021 X 2022	Maturity (field)	0.821204
QS15544	2020 X Average	Flowering (field)	0.714099
QS15544	2020 X Average	Maturity (field)	0.904567
QS15544	2020 X Average	Pod filling (field)	0.900441
QS15544	2021 X Average	Flowering (field)	0.899645
QS15544	2021 X Average	Maturity (field)	0.909629
QS15544	2021 X Average	Pod filling (field)	0.83793
QS15544	2022 X Average	Maturity (field)	0.950216

## Sheet: d. Statistical analysis
	QS15524	t	df	pval	95% confidence interval	Mean of differences
T-test	Flowering (field)	-7.92	170	2.979e-13	-1.32 & -0.79	-1.06
T-test	Pod-filling (field)	-34.91	170	< 2.2e-16	-9.91 & -8.85	-9.38
T-test	Maturity (field)	-37.47	170	< 2.2e-16	-10.50 & -9.45	-9.97
	QS15544	t	df	pval	95% confidence interval	Mean of differences
T-test	Flowering (field)	20.2	161	< 2.2e-16	4.03 & 4.91	4.47
T-test	Pod-filling (field)	27.68	161	< 2.2e-16	8.23 & 9.49	8.86
	QS15544	df	Sum sq	Mean sq	F-value	pval
One-way ANOVA	Maturity (field)	2	15461	7731	273.5	< 2.2e-16
		482	13626	28			Residuals

## Sheet: e. Genotypes QS15524
Genotypes	QS15524p01_1_BC01	QS15524p01_1_BC02	QS15524p01_1_BC03	QS15524p01_1_BC04	QS15524p01_1_BC05	QS15524p01_1_BC06	QS15524p01_1_BC07	QS15524p01_1_BC08	QS15524p01_1_BC09	QS15524p01_1_BC10	QS15524p01_1_BC11	QS15524p01_1_BC12	QS15524p01_1_BC13	QS15524p01_1_BC14	QS15524p01_1_BC15	QS15524p01_1_BC16	QS15524p01_1_BC17	QS15524p01_1_BC18	QS15524p01_1_BC19	QS15524p01_1_BC20	QS15524p01_1_BC21	QS15524p01_1_BC22	QS15524p01_1_BC24	QS15524p01_1_BC25	QS15524p01_1_BC26	QS15524p01_1_BC27	QS15524p01_1_BC29	QS15524p01_1_BC30	QS15524p01_1_BC31	QS15524p01_1_BC32	QS15524p01_1_BC34	QS15524p01_1_BC35	QS15524p01_1_BC36	QS15524p01_1_BC37	QS15524p01_1_BC38	QS15524p01_1_BC39	QS15524p01_1_BC40	QS15524p01_1_BC41	QS15524p01_1_BC42	QS15524p01_1_BC43	QS15524p01_1_BC44	QS15524p01_1_BC45	QS15524p01_1_BC46	QS15524p01_1_BC47	QS15524p01_1_BC48	QS15524p01_1_BC49	QS15524p01_1_BC50	QS15524p01_1_BC51	QS15524p01_1_BC52
GM01:291992	B	B	A	X	X	X	A	B	X	A	B	X	X	X	X	B	X	B	B	A	X	X	A	A	B	X	B	X	A	A	A	A	B	X	A	A	X	X	X	X	X	X	X	B	B	X	B	X	X
GM01:293684	B	B	A	X	X	X	A	B	X	A	B	X	X	X	X	B	X	X	B	A	X	X	A	A	B	X	B	X	A	A	A	A	B	X	X	A	X	X	X	X	X	X	X	B	B	X	B	X	X
GM01:293984	B	B	A	X	X	X	A	B	X	A	B	X	X	X	X	B	X	X	B	A	X	X	A	A	B	X	B	X	A	A	A	A	B	X	X	A	X	X	X	X	X	B	X	B	B	X	B	X	X
GM01:294507	B	B	A	X	X	X	A	B	X	A	B	X	X	X	X	B	X	X	B	A	X	X	A	A	B	X	B	X	A	A	A	A	B	X	X	A	X	X	X	X	X	X	X	B	B	X	B	X	X
GM01:378527	B	B	A	X	X	X	A	B	X	A	B	X	X	X	X	B	X	X	B	A	X	X	A	A	B	X	B	X	A	A	A	A	B	X	X	A	X	X	X	X	X	X	X	B	B	X	B	X	X
GM01:383353	B	B	A	X	X	X	A	B	B	A	B	X	X	X	X	B	X	X	B	A	X	X	A	A	B	X	B	X	A	A	A	A	B	X	X	A	X	X	X	X	X	X	X	B	B	X	B	X	X
GM01:384882	B	B	A	X	X	X	A	B	B	A	B	X	X	X	X	B	X	X	B	A	X	X	A	A	B	X	B	X	A	A	A	A	B	X	X	A	X	X	X	X	X	X	X	B	B	X	B	X	X
GM01:385095	B	B	A	X	X	X	A	B	B	A	B	X	X	X	X	B	X	X	B	A	X	X	A	A	B	X	B	X	A	A	A	A	B	X	X	A	X	X	X	X	X	X	X	B	B	X	B	X	X
GM01:432094	B	B	A	X	X	X	A	B	X	A	B	X	X	X	X	B	X	X	B	A	X	X	A	A	B	X	B	X	A	A	A	A	B	X	X	A	X	X	X	X	X	X	X	B	B	X	B	X	X
GM01:435901	B	B	A	X	X	X	A	B	X	A	B	X	X	X	X	B	X	X	B	A	X	X	A	A	B	X	B	X	A	A	A	A	B	X	X	A	X	X	X	X	X	X	X	B	B	X	B	X	X
GM01:956527	B	B	A	X	X	X	A	B	X	A	B	X	X	X	X	B	X	X	B	A	X	X	A	A	B	X	B	X	A	A	A	A	X	X	X	A	X	X	X	X	X	X	X	B	B	X	B	X	X
GM01:1009547	B	B	A	X	X	X	A	B	X	A	B	X	X	X	X	B	X	X	B	A	X	X	A	A	B	X	B	X	A	A	A	A	X	X	X	A	X	X	X	X	X	X	X	B	B	X	B	X	X
GM01:1335276	B	B	A	X	X	X	A	B	X	A	B	X	X	X	X	B	X	X	B	A	X	X	A	A	B	X	B	X	X	A	A	A	X	X	X	A	X	X	X	X	X	X	X	B	B	X	B	X	X
GM01:1482341	B	B	A	X	X	X	A	B	X	A	B	X	X	X	X	B	X	X	B	A	X	X	A	A	B	X	B	X	X	A	A	A	X	X	X	A	X	X	X	X	X	X	X	B	B	X	B	X	X
GM01:2090957	B	B	A	X	X	X	A	B	X	X	X	X	B	X	X	B	X	X	X	A	X	X	A	A	B	X	B	X	X	A	A	A	X	X	X	A	X	X	X	X	X	X	X	B	B	X	B	X	X
GM01:2122591	B	B	A	X	X	X	A	B	X	X	X	X	B	X	X	B	X	X	X	A	X	X	A	A	B	X	B	X	X	A	A	A	X	X	X	A	X	X	X	X	X	A	X	B	B	X	B	X	X
GM01:2266264	B	B	A	X	X	X	A	B	X	X	X	X	B	A	X	B	X	X	X	A	X	X	A	A	B	X	B	X	X	A	A	A	X	X	X	A	X	X	X	B	X	A	X	B	B	X	B	X	X
GM01:2290277	B	B	A	X	X	X	A	B	X	X	X	X	B	A	X	B	X	X	X	A	X	X	A	A	B	X	B	X	X	A	A	A	X	X	X	A	X	X	X	B	X	A	X	B	B	X	B	X	X
GM01:2290535	B	B	A	X	X	X	A	B	X	X	X	X	B	A	X	B	X	X	X	A	X	X	A	A	B	X	B	X	X	A	A	X	X	X	X	A	X	X	X	B	X	A	X	B	B	X	B	X	X
GM01:4028168	B	B	A	X	X	X	A	B	X	X	X	X	B	B	X	X	X	B	X	A	X	X	X	A	B	B	B	X	X	X	A	X	X	X	X	A	X	X	A	B	X	A	X	B	B	X	A	X	X
GM01:4028291	B	B	A	A	X	X	A	B	X	X	X	X	B	B	X	X	X	B	X	A	X	X	X	A	B	B	B	X	X	X	A	X	X	A	X	A	X	X	A	B	X	A	A	B	B	X	A	X	X
GM01:4034488	B	B	A	A	X	X	A	B	X	X	X	X	B	B	X	X	X	B	X	A	X	X	X	A	B	B	B	X	X	X	A	X	X	A	X	A	X	X	A	B	X	A	A	B	B	X	A	X	X
GM01:4036276	B	B	A	A	X	X	A	B	X	X	X	X	B	B	X	X	X	B	X	A	X	X	X	A	B	B	B	X	X	X	A	X	X	A	X	A	X	X	A	B	X	A	A	B	B	X	A	X	X
GM01:4224556	B	B	A	A	X	X	A	B	X	X	X	X	B	B	X	X	B	B	X	A	X	X	X	A	B	B	B	X	X	X	A	X	X	A	X	X	X	X	A	B	X	A	A	B	B	X	A	X	X
GM01:4744859	X	B	A	A	X	X	X	B	X	X	B	B	B	B	X	X	B	B	X	X	X	X	X	A	B	B	B	X	X	X	A	X	X	A	X	X	X	X	X	B	X	A	A	X	B	A	A	X	X
GM01:4809449	X	B	A	A	X	X	X	B	X	X	B	B	B	B	X	X	B	B	X	X	X	X	X	A	B	B	A	X	X	X	A	X	X	A	X	X	X	X	X	B	X	A	A	X	B	A	A	X	X
GM01:4827708	X	B	A	A	X	X	X	B	X	X	B	B	B	B	X	X	B	B	X	X	X	X	X	A	B	B	A	X	X	X	A	X	X	A	X	X	X	X	X	B	X	A	A	X	B	A	A	X	X
GM01:4845489	X	B	A	A	X	X	X	B	X	X	B	B	B	B	X	X	X	B	X	X	X	X	X	A	B	B	A	X	X	X	A	X	X	A	X	X	X	X	X	B	X	A	A	X	B	A	A	X	X
GM01:5016538	X	B	A	A	X	X	X	B	X	X	B	B	B	B	X	X	X	B	X	X	X	X	X	A	B	B	A	X	X	X	A	X	X	A	X	X	X	B	X	B	X	A	A	X	B	A	A	X	A
GM01:5034109	X	B	A	A	X	X	X	B	X	X	B	B	B	B	X	X	X	B	X	X	X	X	X	A	B	B	A	X	X	X	A	X	X	A	X	X	X	B	X	B	X	A	A	X	B	A	A	X	A
GM01:12794403	X	B	A	A	X	X	X	B	X	X	B	B	X	B	X	X	X	B	X	X	X	X	X	B	B	B	A	X	X	X	A	X	X	A	X	X	X	B	X	B	X	A	A	X	B	A	A	X	A
GM01:13515234	X	B	A	B	X	A	X	B	X	X	B	B	X	B	X	X	B	B	X	X	A	X	X	B	B	B	A	X	X	X	A	X	X	A	A	X	X	B	X	B	X	A	A	X	B	A	A	X	A
GM01:16343505	X	B	A	B	X	A	X	B	X	X	B	B	X	B	X	X	B	B	X	X	A	X	X	B	B	B	A	X	X	X	A	X	X	A	A	X	X	B	X	B	X	A	A	X	B	A	A	X	A
GM01:16381389	X	B	A	B	X	A	X	B	X	X	B	B	X	B	X	X	B	B	X	X	A	X	X	B	B	B	A	A	X	X	A	X	X	A	A	X	X	B	X	B	X	A	A	X	B	A	A	X	A
GM01:38151123	X	B	X	B	X	A	X	B	X	X	X	B	X	B	X	X	X	X	X	X	A	B	X	B	B	X	A	A	X	X	A	X	X	B	A	X	X	B	X	B	X	A	A	X	B	A	A	X	A
GM01:38446656	X	B	X	B	A	A	X	B	X	X	X	B	X	B	X	X	X	X	X	X	A	B	X	B	B	X	A	A	X	X	A	X	X	B	A	X	X	B	X	B	X	A	A	X	B	A	A	X	A
GM01:38707714	X	B	X	B	A	A	X	B	X	X	X	B	X	B	X	X	X	X	X	X	A	B	X	B	B	X	A	A	X	X	A	X	X	B	A	X	X	B	X	B	X	A	A	X	B	A	A	X	A
GM01:38755673	X	B	X	B	A	A	X	B	X	X	X	B	X	B	X	X	X	X	X	X	A	B	X	B	B	X	A	A	X	X	A	X	X	B	A	X	X	B	X	B	X	A	A	X	B	A	A	A	A
GM01:38846201	X	B	X	B	A	A	X	B	X	X	X	B	X	B	X	X	X	X	X	X	A	B	X	B	B	X	A	A	X	X	A	X	X	B	A	X	X	B	X	B	B	A	A	X	A	A	A	A	A
GM01:39202106	X	B	X	B	A	A	X	B	X	X	X	B	X	B	X	X	X	X	X	X	A	B	X	B	B	X	A	A	X	X	A	X	X	B	A	X	X	B	X	B	B	A	A	X	X	A	A	A	A
GM01:39260771	X	B	X	B	A	A	X	B	X	X	X	B	X	B	X	X	X	X	X	X	A	B	X	B	B	X	A	A	X	X	A	X	X	B	A	X	X	B	X	B	B	A	A	X	X	A	A	A	A
GM01:39437361	X	B	X	B	A	A	X	B	X	X	X	B	X	B	X	X	X	X	X	X	A	B	X	B	B	X	A	A	X	X	A	X	X	B	A	X	X	B	X	B	B	A	A	X	X	A	A	A	A
GM01:39602479	X	B	X	B	A	A	X	B	X	X	X	B	X	B	X	X	X	X	X	X	A	B	X	B	B	X	A	A	X	X	A	X	X	B	A	X	X	B	X	B	B	A	A	X	X	A	A	A	A
GM01:39831014	X	B	X	B	A	A	X	B	X	X	X	B	X	B	X	X	X	X	X	X	A	B	X	B	B	X	A	A	X	X	A	X	X	B	A	X	X	B	X	B	B	A	A	X	X	A	A	A	A
GM01:40041585	X	B	X	B	A	A	X	B	X	X	X	B	X	B	X	X	X	X	X	X	A	B	X	B	B	X	A	A	X	X	A	X	X	B	A	X	X	B	X	B	B	A	A	X	X	A	A	A	A
GM01:40394928	B	B	X	B	A	A	X	B	X	A	X	B	X	B	X	X	A	X	X	X	A	B	X	B	B	A	A	A	A	X	A	X	X	B	A	X	X	B	X	B	B	A	A	X	X	A	A	A	A
GM01:40636558	B	B	X	B	A	A	X	B	X	X	X	B	X	B	X	X	X	X	X	X	A	B	X	B	B	X	A	A	X	X	A	X	X	B	A	X	X	B	X	B	B	A	A	X	X	A	A	A	A
GM02:225324	B	B	X	A	A	A	X	X	A	B	X	A	X	B	X	B	B	A	X	B	A	A	X	X	X	A	X	X	X	X	A	A	B	X	A	A	X	X	A	B	X	A	A	A	B	X	B	X	A
GM02:262437	B	B	X	A	X	A	A	X	A	B	X	X	A	B	X	B	X	A	X	B	A	A	X	X	X	X	X	X	X	A	A	X	A	X	X	X	X	X	X	B	X	A	A	A	X	X	B	A	A
GM02:267026	B	B	X	A	X	A	A	X	A	B	X	X	A	B	X	B	X	A	X	B	A	A	X	X	X	X	X	X	A	A	A	X	X	X	X	X	X	X	X	B	X	A	A	A	X	X	B	A	A
GM02:309952	B	B	X	A	X	A	A	X	A	B	X	X	A	B	X	B	B	A	X	B	A	A	X	X	X	X	X	B	X	A	A	X	X	X	X	X	X	X	X	B	X	A	A	A	X	X	B	A	A
GM02:351278	B	B	B	A	X	A	A	X	A	B	X	X	A	B	X	B	X	A	X	B	A	A	X	X	X	X	X	X	X	A	A	X	X	X	X	X	X	B	X	B	X	A	A	A	X	X	B	A	A
GM02:463145	B	B	X	A	X	A	A	X	A	B	X	X	A	B	X	B	X	A	X	B	A	A	X	X	X	X	X	X	X	A	A	X	B	X	X	X	B	X	X	B	X	A	A	A	X	X	B	A	A
GM02:720173	B	B	X	A	X	A	A	X	A	B	X	X	A	B	X	B	X	A	X	B	A	A	X	X	X	X	X	X	X	A	A	X	B	X	X	X	B	X	X	B	X	A	A	A	X	X	B	A	A
GM02:1041040	B	B	X	A	X	A	A	X	A	B	X	X	A	B	X	B	X	A	X	B	A	A	X	X	X	X	X	X	X	A	A	X	B	X	X	X	B	X	X	B	X	A	A	A	X	X	B	A	A
GM02:1448693	B	B	X	A	X	A	A	X	A	B	X	X	A	B	X	B	X	A	X	B	A	A	X	X	X	X	X	X	X	A	A	X	B	X	X	X	B	X	X	B	X	A	A	A	X	X	B	A	A
GM02:1790926	B	X	X	A	X	A	A	X	A	B	X	X	A	B	X	B	X	A	X	X	A	A	X	X	X	X	X	X	X	A	A	X	B	X	X	X	B	X	X	B	X	A	A	A	X	X	B	A	A
GM02:1883298	B	X	X	A	X	A	A	X	A	B	X	X	A	B	X	B	X	A	A	X	A	A	X	X	X	X	X	X	X	A	A	X	B	X	X	X	B	X	X	B	X	A	A	A	X	X	B	A	A
GM02:1883531	B	X	X	A	X	A	A	X	A	B	X	X	A	B	X	B	X	A	A	X	A	A	X	X	X	X	X	X	X	A	A	X	B	X	X	X	B	X	X	B	X	A	A	A	X	X	B	A	A
GM02:1956505	B	X	X	A	X	A	A	X	A	B	X	X	A	B	X	B	X	A	A	X	A	A	X	X	X	X	X	X	X	A	A	X	B	X	X	X	B	X	X	B	X	A	A	A	X	X	B	A	A
GM02:1962706	B	X	X	A	X	A	A	X	A	B	X	X	A	B	X	B	X	A	A	X	A	A	X	X	X	X	X	X	X	A	A	X	B	X	X	X	B	X	X	B	X	A	A	A	X	X	B	X	A
GM02:2781300	B	X	X	A	X	A	X	X	A	B	X	X	A	B	X	X	X	A	A	X	A	A	X	X	X	X	X	X	X	A	A	X	B	X	X	X	B	X	X	B	X	A	A	X	X	X	B	X	A
GM02:3161842	B	X	X	A	X	A	X	X	A	B	X	X	A	B	X	X	X	A	A	X	A	A	X	X	X	X	X	X	X	A	A	X	B	X	X	X	B	X	X	B	X	A	A	X	X	X	B	X	A
GM02:3169447	B	X	X	A	X	A	X	X	A	B	X	X	A	B	X	X	X	A	A	X	A	A	X	X	X	X	X	X	X	A	A	A	B	X	X	X	B	X	X	B	X	A	A	X	X	X	B	X	A
GM02:3169463	B	X	X	A	X	A	X	X	A	B	X	X	A	B	X	X	X	A	A	X	A	A	X	X	X	X	X	X	X	A	A	A	B	X	X	X	B	X	X	B	X	A	A	X	X	X	B	X	A
GM02:3169665	B	X	X	A	X	A	X	X	A	B	X	X	A	B	X	X	X	A	A	X	A	A	X	X	X	X	X	X	X	A	A	A	B	X	X	X	B	X	X	B	X	A	A	X	X	X	B	X	A
GM02:3264767	B	X	X	A	X	A	X	X	A	B	X	X	A	B	X	X	X	A	A	X	A	A	X	X	X	X	X	X	A	A	A	A	B	X	X	X	B	X	X	B	X	A	A	X	X	X	B	X	A
GM02:3264911	B	X	X	A	X	A	X	X	A	B	X	X	A	B	X	X	X	A	A	X	A	A	X	X	X	X	X	X	A	A	A	A	B	X	X	X	B	X	X	B	X	A	A	X	X	X	B	X	A
GM02:3338773	B	X	X	A	X	A	X	X	A	B	A	X	A	B	X	X	X	A	A	X	A	A	X	X	X	X	X	X	A	A	A	A	B	X	X	X	B	X	X	B	X	A	A	X	X	X	B	X	A
GM02:3432031	B	X	X	A	X	A	X	X	A	B	A	X	A	B	X	X	X	A	A	X	A	A	X	X	X	X	X	X	A	A	A	A	B	X	X	X	B	X	X	B	X	A	A	X	X	X	B	X	A
GM02:3530330	B	X	X	A	X	A	X	X	A	B	A	X	A	B	X	X	X	A	A	X	X	A	X	X	X	X	X	X	A	A	A	A	B	X	X	X	B	X	X	B	X	A	A	X	X	X	B	X	A
GM02:3622716	B	X	X	A	X	A	X	X	A	B	A	X	A	B	X	X	X	A	A	X	X	A	X	X	X	X	X	X	A	A	A	A	B	X	X	X	B	X	X	B	X	A	A	X	X	X	B	X	A
GM02:3753592	B	X	X	A	X	A	X	X	A	B	A	X	A	B	X	X	B	A	A	X	X	A	X	X	X	X	X	X	A	A	A	A	B	X	X	X	B	X	X	B	X	A	A	X	X	X	B	X	A
GM02:3793404	B	X	X	A	X	A	X	X	A	B	A	X	A	B	X	X	B	A	A	X	X	A	X	X	X	X	X	X	A	A	A	A	B	X	X	X	B	X	X	B	X	A	A	X	X	X	B	X	A
GM02:3932327	B	X	X	A	X	A	X	X	A	B	A	X	A	B	X	X	B	A	A	X	X	A	X	X	X	X	X	X	A	A	A	A	B	X	X	X	B	X	X	B	X	A	A	X	X	X	B	X	A
GM02:4054885	B	X	X	A	X	A	X	X	A	B	A	X	A	B	X	X	B	A	A	X	X	A	X	X	X	X	X	X	A	A	A	A	B	X	X	X	B	X	X	B	X	A	A	X	X	A	B	X	A
GM02:4210834	B	X	X	A	X	A	X	X	A	B	A	X	A	B	X	X	B	A	A	X	X	A	X	X	X	X	X	X	A	X	A	A	B	X	X	X	B	X	X	B	X	A	A	X	X	A	B	X	A
GM02:4215511	B	X	X	A	X	A	X	X	A	B	A	X	A	B	X	X	B	A	A	X	X	A	X	X	X	X	X	X	A	X	A	A	B	X	X	X	B	X	A	B	X	A	A	X	X	A	B	X	A
GM02:4374520	B	X	X	A	X	A	X	X	A	B	A	X	A	B	X	X	B	A	A	X	X	A	X	X	X	X	X	X	A	X	A	A	B	X	X	X	B	X	A	B	X	A	A	X	X	A	B	X	A
GM02:4412994	B	X	X	A	X	A	X	X	A	B	A	X	A	B	X	X	B	A	A	X	X	A	X	X	X	X	X	X	X	X	A	A	B	X	X	X	B	X	A	B	X	A	A	X	X	A	B	X	A
GM02:4484668	B	X	X	A	X	A	X	X	A	B	A	X	A	B	X	X	B	A	A	X	X	A	X	X	X	X	X	X	X	X	A	A	B	X	X	X	B	X	A	B	X	A	A	X	X	A	B	X	A
GM02:4717047	X	X	X	A	X	A	X	X	A	B	A	X	A	B	X	X	B	A	A	X	X	A	X	X	X	X	X	X	X	X	A	A	B	X	X	X	B	X	A	B	X	A	A	X	X	A	B	B	A
GM02:4939302	X	X	X	A	X	A	X	X	A	B	A	X	A	B	X	X	B	A	A	X	X	A	X	X	X	X	X	X	X	X	A	A	X	A	X	X	B	X	A	B	X	A	A	X	X	A	B	B	A
GM02:5059318	X	X	X	A	X	A	B	X	A	B	A	X	A	B	X	X	B	A	A	X	X	A	X	X	X	X	X	X	X	X	A	A	X	A	X	X	B	X	A	B	X	A	A	X	X	A	B	B	A
GM02:5096858	X	X	X	A	X	A	B	X	A	B	A	X	A	B	X	X	B	A	A	X	X	A	X	X	X	X	X	X	X	X	A	A	X	A	X	X	B	X	A	B	X	X	A	X	X	A	B	B	A
GM02:5250738	X	X	X	A	X	A	B	X	A	B	A	X	A	B	X	X	B	A	A	X	X	A	X	X	X	X	X	X	X	X	A	A	X	A	X	X	B	X	A	B	X	X	A	X	X	A	B	B	A
GM02:5263838	X	X	X	A	X	A	B	X	A	B	A	X	A	B	X	X	B	A	A	X	X	A	X	X	X	X	X	X	X	X	A	A	X	A	X	X	B	X	A	B	X	X	A	X	X	A	B	B	A
GM02:5351331	X	X	X	A	X	A	B	X	A	B	A	X	A	B	X	X	B	A	A	X	B	A	X	X	X	X	X	X	X	X	A	A	X	A	X	X	B	X	A	X	X	X	A	X	X	A	B	B	A
GM02:5457935	X	X	X	A	X	A	B	X	A	B	A	X	A	B	X	X	B	A	A	X	B	A	X	X	X	X	X	X	X	X	A	A	X	A	X	X	B	X	A	X	X	X	A	X	X	A	B	B	A
GM02:5851413	X	X	X	A	X	A	B	X	A	B	A	B	A	B	X	X	B	A	A	X	B	A	X	X	X	X	X	X	X	X	A	A	X	A	X	X	B	X	A	X	A	X	A	X	X	A	B	B	A
GM02:5855107	X	X	X	A	X	A	B	X	A	B	A	B	A	B	X	X	B	A	A	X	B	A	X	X	X	X	X	X	X	X	A	A	X	A	X	X	B	X	A	X	A	X	A	X	X	A	B	B	A
GM02:6045558	X	X	X	A	X	A	B	X	A	B	A	B	A	B	X	X	B	A	A	X	B	A	X	X	X	X	X	X	X	X	A	A	X	A	X	X	B	X	A	X	A	X	A	X	X	A	B	B	A
GM02:6249132	X	X	X	A	X	A	B	X	A	B	A	B	A	X	X	X	B	A	A	X	B	A	X	X	X	X	X	X	X	X	A	A	X	A	X	X	B	X	A	X	A	B	X	X	X	A	B	X	A
GM02:6268417	X	X	X	A	X	A	B	X	X	B	A	B	A	X	X	X	B	A	A	X	B	A	X	X	X	X	X	X	X	X	A	A	X	A	X	X	B	X	A	X	A	B	X	X	X	A	B	X	A
GM02:6509512	X	X	X	A	X	A	B	X	X	B	A	B	A	X	X	A	B	A	A	X	B	A	X	X	X	X	X	X	X	X	A	A	X	A	X	X	B	X	A	X	A	B	X	X	X	A	B	X	A
GM02:6514182	X	X	X	A	X	A	B	X	X	B	A	B	X	X	X	A	B	A	A	X	B	X	X	X	X	X	X	X	X	X	A	X	X	A	X	X	B	X	A	B	A	B	X	X	X	A	B	X	A
GM02:6959667	X	X	X	A	B	A	B	X	X	B	A	B	X	X	X	A	B	X	A	X	B	X	X	B	X	B	X	X	X	X	A	X	X	A	X	X	B	X	A	B	A	B	X	X	X	A	B	X	A
GM02:7057075	X	X	A	A	B	A	B	X	X	B	A	B	X	X	X	A	B	X	A	X	B	X	X	B	X	B	X	X	X	X	X	X	X	A	X	X	B	X	A	B	A	B	X	X	X	A	B	X	A
GM02:7181680	X	X	A	A	B	A	B	X	X	B	A	B	X	X	X	A	B	X	A	X	B	X	X	B	X	B	X	X	X	X	X	X	X	A	X	X	B	X	A	B	A	B	X	X	X	A	B	X	A
GM02:7405337	X	X	A	A	B	A	B	X	X	B	A	B	X	X	X	A	B	X	A	X	B	X	X	B	X	B	X	X	X	X	X	X	X	A	X	X	B	X	A	B	A	B	X	X	X	A	B	X	A
GM02:7540727	X	X	A	A	B	A	B	X	X	B	A	B	X	X	X	A	B	X	A	X	B	X	X	B	X	B	X	X	X	X	X	X	X	A	X	X	B	X	A	B	A	B	X	X	X	A	B	X	A
GM02:7966686	X	X	A	A	B	A	B	X	X	B	A	B	X	X	X	A	B	X	A	X	B	X	X	B	X	B	X	X	X	X	X	X	X	A	X	X	B	X	A	B	A	B	X	X	X	A	B	X	A
GM02:8025781	X	X	A	A	B	A	B	X	X	B	A	B	X	X	X	A	B	X	A	X	B	X	X	B	X	B	X	X	X	A	X	X	X	A	X	X	B	X	A	B	A	B	X	X	X	A	B	X	A
GM02:8283376	X	X	A	A	B	A	B	X	X	B	A	B	X	X	X	A	B	X	A	X	B	X	X	B	X	B	X	X	X	A	X	X	X	A	X	X	B	X	A	B	A	B	X	X	X	A	B	X	A
GM02:8303364	X	X	X	A	B	A	B	X	X	B	A	B	X	X	X	A	B	X	A	X	B	X	X	B	X	B	X	X	X	A	X	X	X	A	X	X	B	X	A	B	A	B	X	X	X	A	B	X	A
GM02:8544380	X	X	X	A	B	A	B	X	X	B	A	B	X	X	X	A	B	X	A	X	B	X	X	B	X	B	X	X	X	X	X	X	X	A	X	X	B	X	A	B	A	B	X	X	X	A	B	X	A
GM02:8772659	X	X	X	A	B	A	B	X	X	B	A	B	X	X	X	A	B	X	A	X	B	X	X	B	X	B	X	X	X	X	X	X	X	A	X	X	B	X	A	B	A	B	X	X	X	A	B	X	A
GM02:8816514	X	X	X	A	B	A	B	X	X	B	A	B	X	X	X	A	B	X	A	X	B	X	X	B	X	B	X	X	A	X	X	X	A	A	X	X	B	X	A	B	A	B	X	X	X	A	B	X	A
GM02:9427825	X	X	X	A	B	A	B	X	X	B	A	B	X	X	X	A	B	X	A	X	X	X	X	B	X	B	X	X	A	X	X	X	A	A	X	X	B	X	A	B	A	B	X	X	X	A	B	X	A
GM02:9752102	X	X	X	A	B	A	B	X	X	B	A	B	X	X	X	A	B	X	A	X	X	X	X	B	X	B	X	X	A	X	X	X	A	A	X	X	B	X	A	B	A	B	X	X	X	A	B	X	A
GM02:10113138	X	X	X	A	B	A	B	A	X	B	A	B	X	X	X	A	B	X	A	X	X	X	X	B	X	B	X	X	A	X	X	X	A	A	X	X	B	X	A	B	A	B	X	X	X	A	B	X	A
GM02:10252576	X	X	X	A	B	A	B	A	X	B	A	B	X	X	X	A	B	X	X	X	X	X	X	B	X	B	X	X	A	X	X	X	A	A	X	X	B	X	A	B	A	B	X	X	X	A	B	X	A
GM02:10409311	X	X	X	A	B	A	B	A	X	B	A	B	X	X	X	A	B	X	X	X	X	X	X	B	X	X	X	X	A	X	X	X	A	A	X	X	B	X	A	B	A	B	X	X	X	A	B	X	A
GM02:10426917	X	X	X	A	B	A	B	A	X	B	B	B	X	X	X	A	B	X	X	X	X	X	X	B	X	X	X	X	A	X	X	X	A	A	X	X	B	X	A	B	X	B	X	X	X	A	B	X	A
GM02:10482307	X	X	X	A	B	A	B	A	X	B	B	B	X	X	X	A	B	X	X	X	X	X	X	B	X	X	X	X	A	X	X	X	A	X	X	X	B	X	A	B	X	B	X	X	X	A	B	X	A
GM02:10750017	X	X	X	A	B	A	B	A	X	B	B	B	X	X	X	A	B	X	X	X	X	X	X	B	X	X	X	X	A	X	X	X	A	X	X	X	B	X	A	B	X	B	X	X	X	A	B	X	A
GM02:10879934	X	X	X	A	B	A	B	A	X	B	B	B	X	X	X	A	B	X	X	X	X	X	X	B	X	X	X	X	A	X	X	X	A	X	X	X	B	X	A	B	X	B	X	X	X	A	B	X	A
GM02:10880103	X	X	X	A	B	A	B	A	X	B	B	B	X	X	X	A	B	X	X	X	X	X	X	B	X	X	X	X	A	X	X	X	A	X	X	X	B	X	A	B	X	B	X	X	X	A	B	X	A
GM02:10957708	X	X	X	A	B	A	B	A	X	B	B	B	X	X	X	A	B	X	X	X	X	X	X	B	X	X	X	X	A	X	X	X	A	X	X	X	X	B	A	B	X	B	X	X	X	A	B	X	A
GM02:11013741	X	X	X	A	B	A	B	A	X	B	B	B	X	X	X	A	B	X	X	X	X	X	X	B	X	X	X	X	A	X	X	X	A	X	X	X	X	B	A	B	X	B	X	X	X	A	B	X	A
GM02:11286699	X	B	X	A	B	A	B	A	X	B	B	B	X	X	X	A	B	X	X	X	X	X	X	B	X	X	X	X	A	X	X	X	A	X	X	X	X	B	A	B	X	B	X	X	X	A	B	X	A
GM02:11382997	X	B	X	A	B	A	B	A	X	B	B	B	X	X	X	A	B	X	X	X	X	X	X	B	X	X	X	X	A	X	X	X	A	X	X	X	X	B	A	B	X	B	X	X	X	A	B	X	A
GM02:11775427	X	B	X	A	B	A	B	A	X	B	B	B	X	X	X	A	B	X	X	X	X	X	X	B	X	X	X	X	A	X	X	X	A	X	X	X	X	B	A	B	X	B	X	X	X	A	B	X	A
GM02:11838070	X	B	X	A	B	A	B	A	X	B	B	B	X	X	X	A	B	X	X	X	X	X	X	B	X	X	X	X	A	X	X	X	A	X	X	X	X	B	A	B	X	B	X	X	X	A	B	X	A
GM02:12293737	X	B	X	A	B	X	B	X	X	B	B	B	X	X	X	A	B	X	X	X	X	X	X	B	X	X	X	X	A	X	X	B	A	B	X	X	X	B	A	B	X	B	X	X	X	X	B	X	A
GM02:13939297	X	B	X	A	B	X	B	X	X	B	B	B	X	X	X	A	B	X	X	X	X	X	X	B	X	X	X	X	A	X	X	B	A	B	X	X	X	B	A	B	X	B	X	X	X	X	B	X	A
GM02:13960707	X	B	X	A	B	X	B	X	X	B	B	B	X	X	X	A	B	X	X	X	X	X	X	B	X	X	X	X	A	X	X	B	A	B	X	X	X	B	A	B	X	B	X	X	X	X	B	X	A
GM02:14199288	X	B	X	A	B	X	B	X	X	B	B	B	X	X	X	A	B	X	X	X	X	X	X	B	X	X	X	X	A	X	X	B	A	B	X	X	X	B	A	B	X	B	X	X	X	X	B	X	A
GM02:14201047	X	B	X	A	B	X	B	X	X	B	B	B	X	X	X	A	A	X	X	X	X	X	X	B	X	X	X	X	A	X	X	B	A	B	X	X	X	B	A	B	X	B	X	X	X	X	B	X	A
GM02:14233410	X	B	X	A	B	X	B	X	X	B	B	B	X	A	X	A	A	X	X	X	X	X	X	B	X	X	X	X	A	X	X	B	A	B	X	X	X	B	A	B	X	B	X	X	X	X	B	X	A
GM02:14239627	X	B	X	A	B	X	B	X	X	B	B	B	X	A	X	A	A	X	X	X	X	X	X	B	X	X	X	X	A	X	X	B	A	B	X	X	X	B	A	B	X	B	X	X	X	X	B	X	A
GM02:14240853	X	X	X	A	B	X	B	X	X	B	B	B	X	A	X	A	A	X	X	X	X	X	X	B	X	X	X	X	A	X	X	B	A	B	X	X	X	B	A	B	X	B	X	X	X	X	B	X	A
GM02:15523496	X	X	B	X	X	X	X	X	X	A	B	X	X	A	X	X	A	X	X	X	A	X	X	X	X	X	X	X	A	B	B	B	A	X	X	X	X	B	B	B	X	B	X	X	X	X	X	X	A
GM02:15693475	X	X	B	X	X	X	X	X	X	A	B	X	X	A	X	X	A	X	X	X	A	X	X	X	X	X	B	X	X	B	B	B	A	X	X	X	A	B	B	B	X	B	X	X	X	X	X	X	A
GM02:15762029	X	X	B	X	X	X	X	X	X	A	B	X	X	A	X	X	A	X	X	X	A	X	X	X	X	X	B	X	X	B	B	B	A	X	X	X	A	B	B	B	X	B	X	X	X	X	X	X	A
GM02:15802605	X	X	B	X	X	X	X	X	X	A	B	X	X	A	X	X	A	X	X	X	A	X	X	X	X	X	B	X	X	B	B	B	A	X	X	X	A	B	B	B	X	B	X	X	X	X	X	X	A
GM02:17374446	X	X	B	X	X	X	X	X	X	A	B	X	X	A	X	X	A	X	X	X	A	X	X	X	X	X	B	X	X	B	B	B	A	X	X	X	A	B	B	B	X	B	X	X	X	X	X	X	A
GM02:17855863	X	X	B	X	X	X	X	X	X	A	B	X	X	A	X	X	A	X	X	X	A	X	X	X	X	X	B	X	X	B	B	B	A	X	X	X	A	B	B	B	X	B	X	X	X	X	X	X	A
GM02:23883471	A	X	B	A	X	X	X	X	X	A	B	X	X	A	X	X	A	X	X	X	A	X	X	X	X	X	B	X	X	B	B	B	A	X	X	X	A	B	B	B	X	B	X	X	X	X	X	X	A
GM02:24554613	X	X	B	X	X	X	X	X	X	A	B	X	X	A	X	X	A	X	X	X	A	X	X	X	X	X	B	X	X	B	B	B	A	X	X	X	A	B	B	B	X	B	X	X	X	X	X	X	A
GM02:33216403	X	X	B	X	X	X	X	X	X	A	B	X	X	X	X	X	A	X	X	X	A	B	X	X	X	X	B	X	X	B	B	B	A	X	X	X	A	B	B	B	X	B	X	X	X	X	X	X	A
GM02:35598038	X	X	B	X	X	X	X	X	X	A	B	X	X	X	X	X	A	X	X	X	A	B	X	X	X	X	B	X	X	B	B	B	A	X	B	X	A	B	B	B	X	B	X	X	X	X	X	X	A
GM02:36591483	X	X	B	X	X	X	X	X	X	A	B	X	X	X	X	X	A	X	X	X	A	B	X	X	X	X	B	X	X	B	B	B	A	X	B	X	A	B	B	B	X	B	X	X	X	X	X	X	X
GM02:36767931	X	X	B	X	X	X	X	X	X	A	B	X	X	X	X	X	A	X	X	X	A	B	X	X	X	X	B	X	X	B	B	B	A	X	B	X	A	B	B	B	X	B	X	X	X	X	X	X	X
GM02:37044292	X	X	B	X	B	X	X	X	X	A	B	X	X	X	X	X	A	X	X	X	A	B	X	X	X	X	B	X	X	B	B	B	A	X	B	X	A	B	B	B	X	B	X	X	X	X	X	X	X
GM02:37625512	X	X	B	X	B	X	X	X	X	A	B	X	X	X	X	X	A	X	X	X	A	B	X	X	X	X	B	B	X	B	B	B	A	X	B	X	A	B	B	B	X	B	X	X	X	X	X	X	X
GM02:38400782	X	X	B	X	B	X	X	X	X	A	B	X	X	X	X	X	A	X	X	X	A	B	X	X	X	X	B	B	X	B	B	B	A	X	B	X	A	B	B	B	X	B	X	X	X	X	X	X	X
GM02:38862876	X	X	B	X	B	X	X	X	X	A	B	X	X	X	X	X	A	X	X	X	A	B	X	X	X	X	B	B	X	B	B	B	A	X	B	X	A	B	B	B	X	B	X	X	X	X	X	X	X
GM02:38935936	X	X	B	X	B	X	X	X	X	A	B	X	X	X	X	X	A	X	X	X	A	B	X	X	X	X	B	B	X	B	B	B	A	X	B	X	A	B	B	B	X	B	X	X	X	X	X	X	X
GM02:39078462	X	X	B	X	B	X	X	X	X	A	B	X	X	X	X	X	A	X	X	X	A	B	X	X	X	X	B	B	X	B	B	B	A	X	X	X	A	B	X	B	X	B	X	X	X	X	X	X	X
GM02:39126047	X	X	B	X	B	X	X	X	X	A	B	X	X	X	X	X	A	X	X	X	A	B	X	X	X	X	B	B	X	B	A	B	A	X	X	X	A	B	X	B	X	B	X	X	X	X	X	X	X
GM02:39243448	X	X	X	X	X	X	X	X	X	A	B	X	X	X	X	X	X	X	B	B	X	B	X	X	X	X	B	B	X	B	A	B	A	X	X	X	A	B	X	B	X	B	X	X	X	X	X	X	X
GM02:42115242	X	X	X	X	X	X	X	X	B	A	B	X	A	B	B	X	X	B	B	B	X	A	X	X	A	B	B	B	B	B	A	X	X	X	X	A	X	B	X	X	X	X	X	X	X	X	X	X	X
GM02:42144398	X	X	X	X	X	X	X	X	B	A	B	X	A	B	B	X	X	B	B	B	X	A	X	X	A	B	B	B	B	B	A	X	X	X	X	A	X	B	X	X	X	X	X	X	X	X	X	X	X
GM02:42147492	X	X	X	X	X	X	X	X	B	A	B	X	A	B	B	X	X	B	B	B	X	A	X	X	A	B	B	B	B	B	A	X	X	X	X	A	X	B	X	X	X	X	X	X	X	X	X	A	X
GM02:42179202	X	X	X	X	X	X	X	X	B	A	B	X	A	B	B	X	X	B	B	B	X	A	X	X	A	B	B	B	B	B	A	X	X	X	X	A	X	B	X	X	X	X	X	X	X	X	X	A	X
GM02:42304276	X	X	X	X	X	X	X	X	B	A	B	X	A	B	B	B	X	B	B	B	X	A	X	X	A	B	B	B	B	B	A	X	X	X	X	A	X	B	X	X	X	X	X	X	X	X	X	A	X
GM02:42410967	X	X	X	X	X	X	X	X	B	A	B	X	A	B	B	B	X	B	B	B	X	A	X	B	A	B	B	B	B	B	A	X	X	X	X	A	X	B	X	X	X	X	X	X	X	X	X	A	X
GM02:42523943	X	X	X	X	X	X	X	X	B	A	B	X	A	B	B	B	X	B	B	B	X	A	X	B	A	B	B	B	B	B	A	X	X	X	X	A	X	B	X	X	X	X	X	X	X	X	X	A	X
GM02:43073467	X	X	X	X	X	X	X	X	B	A	B	X	A	B	B	B	X	B	B	B	X	A	X	B	A	B	B	A	B	B	A	X	X	X	X	A	X	B	X	X	X	X	B	X	X	X	X	A	X
GM02:44834458	X	X	X	X	X	X	X	X	B	A	B	B	A	B	B	B	X	B	X	B	X	A	X	B	A	X	B	A	B	B	X	X	X	X	X	A	X	B	X	X	X	B	B	X	X	X	X	A	X
GM02:44836801	X	X	X	X	X	X	X	X	B	A	B	B	A	B	B	B	X	B	X	B	X	A	X	B	A	X	B	A	B	B	X	X	X	X	X	A	X	B	A	X	X	B	B	X	X	X	X	A	X
GM02:45105500	X	X	X	X	X	X	X	X	B	A	B	B	X	B	B	B	X	B	X	B	X	A	X	B	A	X	B	A	B	B	X	X	X	X	X	A	X	B	A	X	X	B	B	X	X	X	X	A	X
GM02:45136244	X	X	X	X	X	X	X	X	B	A	B	B	X	B	B	B	X	B	X	B	X	A	X	B	A	X	B	A	B	B	X	X	X	X	X	A	X	B	A	X	X	B	B	X	X	X	X	A	X
GM02:45234788	X	X	X	X	X	X	X	X	B	A	B	B	X	B	B	B	X	B	X	B	X	A	X	B	A	X	B	A	B	B	X	X	X	X	X	A	X	B	A	X	X	B	B	X	X	X	X	A	X
GM02:45998128	X	B	X	X	X	X	X	X	B	A	B	B	X	B	B	B	X	B	X	B	X	A	X	B	A	X	X	A	B	B	X	X	X	X	X	A	X	B	A	X	X	X	B	X	X	X	X	X	X
GM02:46000020	X	B	X	X	X	X	X	X	B	A	B	B	X	A	B	B	X	B	X	B	X	A	X	B	A	X	X	A	B	B	X	X	X	X	X	A	X	B	A	A	X	X	B	X	X	A	X	X	X
GM02:46599587	X	B	X	X	X	X	A	X	B	A	B	B	X	A	B	B	X	B	X	B	X	A	B	B	A	X	X	A	B	B	X	X	B	X	X	A	X	B	A	A	X	X	B	X	X	A	X	X	X
GM02:46714220	X	B	X	X	X	X	A	X	B	A	B	B	X	A	B	X	X	B	X	B	X	A	B	B	A	X	X	A	B	B	X	X	B	X	X	A	X	B	A	A	X	X	B	X	X	A	X	X	X
GM02:46714234	X	B	X	X	X	X	A	X	B	A	B	B	X	A	B	X	X	B	X	B	X	A	B	B	A	X	X	A	B	B	X	X	B	X	X	A	X	B	A	A	X	X	B	X	X	A	X	X	X
GM02:46714256	X	B	X	X	X	X	A	X	B	A	B	B	X	A	B	X	X	B	X	B	X	A	B	B	A	X	X	A	B	B	X	X	B	X	X	A	X	B	A	A	X	X	B	X	X	A	X	X	X
GM02:46714466	X	B	X	X	X	X	A	X	B	A	B	B	X	A	B	X	X	A	X	B	X	A	B	B	A	X	X	A	B	B	X	X	B	X	X	A	X	B	A	A	X	X	B	X	X	A	X	X	X
GM02:47078880	X	B	X	X	X	X	A	X	B	A	B	B	X	A	B	X	X	A	X	B	X	A	B	B	A	X	X	A	B	B	X	X	B	X	X	A	X	B	A	A	X	X	B	X	X	A	X	X	X
GM02:47445867	X	B	X	X	X	X	A	X	B	A	B	B	X	A	B	X	X	A	X	B	X	A	B	B	A	X	X	A	B	B	X	X	B	X	X	A	A	B	A	A	X	X	B	X	X	A	X	X	A
GM02:47446005	X	B	X	X	X	X	A	X	B	A	B	B	X	A	B	X	X	A	X	B	X	A	B	B	A	X	B	A	B	B	X	X	B	X	X	A	A	B	A	A	X	X	B	X	X	A	X	X	A
GM02:47446147	X	B	X	X	X	X	A	X	B	A	B	B	X	A	B	X	X	A	X	B	X	A	B	B	A	X	B	A	B	B	X	X	B	X	X	A	A	B	A	A	X	X	X	X	X	A	X	X	A
GM02:47679024	X	B	X	X	X	X	A	X	B	A	B	B	X	A	B	X	X	A	X	B	X	A	B	B	A	X	B	A	B	B	X	X	B	X	X	A	A	B	A	A	X	X	X	X	X	A	X	X	A
GM02:47704887	X	B	X	X	X	X	A	X	B	A	B	B	X	A	B	X	X	A	X	B	X	A	B	B	A	X	X	A	X	X	X	X	B	X	X	A	A	B	A	A	X	X	X	X	X	X	A	X	A
GM02:47704996	X	B	X	X	X	X	A	X	B	A	B	B	X	A	B	A	X	A	X	B	X	A	B	B	A	X	X	A	X	X	X	X	B	X	X	A	A	B	A	A	X	X	X	X	A	X	A	X	A
GM02:47865467	X	B	X	X	X	X	A	X	B	A	B	B	X	A	B	X	A	A	X	B	X	A	B	B	A	B	X	A	X	X	X	X	B	X	X	A	A	B	A	A	X	X	X	X	X	X	A	X	A
GM02:47874092	X	B	X	X	X	X	A	X	B	A	B	B	X	A	B	X	X	A	X	B	X	A	B	B	A	X	X	A	X	X	X	X	B	X	X	A	A	B	A	A	X	X	X	X	X	X	A	X	A
GM03:380651	A	A	X	A	A	X	X	X	A	X	A	X	A	X	X	A	A	B	A	X	B	X	B	X	X	X	A	X	X	X	X	B	B	X	X	X	X	A	A	X	A	X	X	X	A	X	X	B	X
GM03:394593	A	A	X	A	A	X	X	X	A	X	A	X	A	X	X	A	A	B	A	X	B	X	B	X	X	X	A	X	X	X	X	B	B	X	X	X	X	A	A	X	A	X	X	X	X	X	X	B	X
GM03:547115	A	A	X	A	A	X	X	X	A	X	A	X	A	X	X	A	X	B	A	X	B	X	B	X	X	X	A	X	X	B	X	B	B	X	X	X	X	A	A	X	X	X	X	X	X	X	X	B	X
GM03:560688	A	A	X	A	A	X	X	X	A	X	A	X	A	X	X	A	A	B	A	X	B	X	B	X	X	X	A	X	X	B	X	B	B	X	X	X	X	A	A	X	X	A	X	X	X	X	X	B	X
GM03:566888	A	A	X	A	A	X	X	X	A	B	A	X	A	X	X	A	A	B	A	X	B	X	B	X	X	X	A	X	B	B	X	B	B	X	X	X	X	A	A	X	X	A	X	X	B	X	B	B	X
GM03:570789	A	A	X	A	A	X	X	X	A	X	A	X	X	X	X	A	A	B	A	X	B	X	B	X	X	X	A	X	X	B	X	B	B	X	X	X	X	A	A	X	X	X	X	X	X	X	X	B	X
GM03:616263	A	A	X	A	A	X	X	X	A	X	A	X	X	X	X	A	A	B	A	X	B	X	B	X	X	X	A	A	X	B	X	B	B	X	X	X	X	A	A	X	X	X	X	X	X	X	X	B	X
GM03:668646	A	A	X	A	A	X	X	X	A	X	A	X	X	X	X	A	A	B	A	X	B	X	B	X	X	X	A	A	X	B	X	B	B	X	X	X	X	A	A	X	X	X	X	X	X	X	X	B	X
GM03:876071	A	A	X	A	A	X	X	X	A	X	A	X	X	X	X	A	A	B	A	X	B	X	B	X	X	X	A	A	X	B	X	B	B	X	X	X	X	A	A	X	X	X	X	X	X	X	X	B	X
GM03:888998	A	A	X	A	A	X	X	X	A	X	A	X	X	X	X	A	A	B	A	X	B	X	B	X	X	X	A	A	X	B	X	B	B	X	X	X	X	A	A	X	X	X	X	X	X	X	X	B	X
GM03:1411884	A	A	X	A	A	X	X	X	A	X	A	X	X	X	X	A	A	B	A	X	B	X	B	X	X	X	A	A	X	B	X	B	B	X	X	X	X	A	A	X	X	X	X	X	X	X	X	B	X
GM03:1412048	A	A	X	A	A	X	X	X	A	X	A	X	X	X	X	A	A	B	A	X	B	X	B	X	X	X	A	A	X	B	X	B	B	X	X	X	X	A	A	X	X	X	X	X	X	X	X	B	X
GM03:1688109	A	A	X	A	A	X	X	X	A	X	A	X	X	X	X	A	A	B	A	X	B	X	B	X	X	X	A	A	X	B	X	B	B	X	X	X	X	A	A	X	X	X	X	X	X	X	X	X	X
GM03:1693384	A	A	X	A	A	X	X	X	A	X	A	X	X	X	X	A	A	B	A	X	B	X	B	X	X	X	A	A	X	B	X	B	B	A	X	X	X	A	A	X	X	X	X	X	X	X	X	X	X
GM03:1876092	A	A	X	A	A	X	X	X	X	X	A	X	X	X	X	A	A	B	A	X	B	X	B	X	X	X	A	A	X	B	X	B	B	A	X	X	X	A	A	X	X	X	X	X	X	X	X	X	X
GM03:1944329	A	A	X	A	A	X	X	X	X	X	A	X	X	X	X	A	A	B	A	X	B	X	B	X	X	X	A	X	X	B	X	B	B	A	X	X	X	A	A	X	X	X	X	X	X	X	X	X	X
GM03:2000805	A	A	X	A	A	X	X	X	X	X	A	X	X	X	X	A	A	B	A	X	B	X	B	X	X	X	A	A	X	B	X	B	B	A	X	X	X	A	A	X	X	X	X	X	X	X	X	X	X
GM03:2051343	A	A	X	A	A	X	X	X	X	X	A	X	X	X	X	A	A	B	A	X	B	X	B	X	X	X	X	A	X	B	X	B	X	A	X	X	X	A	A	X	X	X	X	X	X	X	X	X	X
GM03:2411109	A	A	X	A	A	X	X	X	X	X	A	X	X	X	X	A	A	B	A	X	B	X	B	X	X	X	X	X	X	B	X	B	X	A	X	X	X	A	A	X	X	X	X	X	X	X	X	X	X
GM03:2411229	A	A	X	A	A	X	X	X	X	X	A	X	X	X	X	A	A	B	A	X	B	X	B	X	X	X	X	X	X	B	X	B	X	A	X	X	X	A	A	X	X	X	X	X	X	X	X	X	X
GM03:2501057	A	A	X	A	A	X	X	X	X	X	A	X	X	X	X	A	A	B	A	X	B	X	B	X	X	X	X	X	X	B	X	B	X	A	X	X	X	A	A	X	X	X	X	X	X	X	X	X	X
GM03:2586595	A	A	A	A	A	X	X	X	X	X	A	X	X	X	X	A	A	B	A	X	B	X	B	X	X	X	X	X	X	B	X	B	X	A	X	X	X	A	A	X	X	X	X	X	X	X	X	X	X
GM03:2746069	A	A	A	A	A	X	X	X	X	X	A	X	X	X	X	A	A	B	A	X	B	X	B	X	X	X	X	X	X	B	X	B	X	A	X	X	X	A	A	X	X	X	X	X	X	X	X	X	X
GM03:2851351	A	A	A	A	A	X	X	X	X	X	A	X	X	X	X	A	A	B	A	X	B	X	B	X	X	X	X	X	X	B	X	B	X	A	X	X	X	A	A	X	X	X	X	X	X	X	X	X	X
GM03:2935139	A	A	A	A	A	X	X	X	X	X	A	X	X	X	X	A	A	B	A	X	B	X	B	X	X	X	X	X	X	B	X	B	X	A	X	X	X	A	A	X	X	X	X	X	X	X	X	X	X
GM03:3056821	A	A	A	A	A	X	X	X	X	X	A	X	X	X	X	A	A	B	A	X	B	X	B	X	X	X	X	X	X	B	X	B	X	A	X	X	X	A	A	X	X	X	X	X	X	X	X	X	X
GM03:3291781	A	A	A	A	X	X	X	X	X	X	A	X	X	X	X	A	A	B	A	X	B	X	B	X	X	X	X	X	X	B	X	B	X	A	X	X	X	A	A	X	X	X	X	X	X	X	X	X	X
GM03:3492240	A	A	A	A	X	X	X	X	X	X	A	X	X	X	X	A	A	B	A	X	B	X	B	X	X	X	X	X	X	B	X	B	X	A	X	X	X	A	A	X	X	X	X	X	X	X	X	X	X
GM03:3637876	A	A	A	A	X	X	X	X	X	X	X	X	X	X	X	X	A	B	X	X	B	X	B	X	X	X	X	X	X	B	X	B	X	A	X	X	X	X	A	X	X	X	X	X	X	X	X	X	X
GM03:8291063	X	A	A	X	X	X	X	X	X	A	X	X	X	X	B	X	X	X	X	X	X	A	X	X	X	X	X	X	X	B	B	B	A	A	X	B	X	X	B	X	B	B	X	A	X	X	X	X	B
GM03:8329958	X	A	A	X	X	X	A	X	X	A	X	X	X	X	B	X	X	X	X	X	X	A	X	X	X	X	X	X	X	B	B	B	A	A	X	B	X	X	B	X	B	B	X	A	X	X	A	X	B
GM03:8408094	X	A	A	X	X	X	A	X	X	A	X	X	X	X	B	X	X	X	X	X	X	A	X	X	X	X	X	X	X	B	B	B	A	A	X	B	X	X	B	X	B	B	X	A	X	X	A	X	B
GM03:8422232	X	A	A	X	X	X	A	X	X	A	X	X	X	X	B	X	X	X	X	X	X	A	X	X	A	X	X	X	X	B	B	B	A	A	X	B	X	X	B	X	B	B	X	A	X	X	A	X	B
GM03:15293161	X	A	A	X	X	X	A	X	X	A	X	X	X	X	B	X	X	X	X	X	X	A	B	X	A	X	X	X	X	B	B	B	A	A	X	B	X	X	B	X	B	B	X	A	X	X	A	X	B
GM03:15422563	X	A	A	X	X	X	A	X	X	A	X	X	X	X	B	X	X	X	X	X	X	A	X	X	A	X	X	X	X	B	B	B	A	A	X	B	X	X	B	X	B	B	X	A	X	X	A	X	B
GM03:16641699	X	A	A	X	X	X	A	X	X	A	X	X	X	X	B	X	X	X	X	X	X	A	X	X	A	X	X	X	X	B	B	B	X	A	X	B	X	X	B	X	B	B	X	A	X	X	A	X	B
GM03:17391578	X	A	A	X	X	X	A	X	X	A	X	X	X	X	B	X	X	X	X	X	X	A	X	X	A	X	X	X	X	B	B	B	X	A	X	B	X	X	B	X	B	B	X	A	X	X	A	X	B
GM03:17499192	X	A	A	X	X	X	A	X	X	A	X	X	X	X	B	X	X	X	X	X	X	A	X	X	A	X	X	X	X	B	B	B	X	A	X	B	X	X	B	X	B	B	X	A	X	X	A	X	B
GM03:17805938	X	A	A	X	X	X	A	X	X	A	X	X	X	X	B	X	X	X	X	X	X	A	X	X	A	X	X	X	X	B	B	B	X	A	X	B	X	X	B	X	B	B	X	A	X	X	A	X	B
GM03:17806206	X	A	X	X	X	X	A	X	X	A	X	X	X	X	B	X	X	X	X	X	X	A	X	X	A	X	X	X	X	B	B	B	X	A	X	B	X	X	B	A	B	B	X	A	X	X	A	X	B
GM03:18095439	X	A	X	X	X	X	A	X	X	A	X	X	X	X	B	X	X	X	X	X	X	A	X	X	A	X	X	X	X	B	B	B	X	A	X	B	X	X	B	A	B	B	X	A	X	X	A	X	B
GM03:19239561	X	A	X	B	X	X	A	X	X	A	X	X	X	X	B	X	X	X	X	X	A	A	X	X	A	X	X	X	X	B	B	B	X	A	X	B	X	X	B	A	B	B	X	A	X	X	A	X	B
GM03:19258176	X	A	X	B	X	X	A	X	X	A	X	X	X	X	B	X	X	X	X	X	A	A	X	X	A	X	X	X	X	B	B	B	X	A	X	B	X	X	B	A	B	B	X	A	X	X	A	X	B
GM03:19264241	X	A	X	B	X	X	A	X	X	A	X	X	X	X	B	X	X	X	X	X	A	A	X	X	A	X	X	X	X	B	B	B	X	A	X	B	X	X	B	A	B	B	X	A	X	X	A	X	B
GM03:19302684	X	A	X	B	X	X	A	X	X	A	X	X	X	X	B	X	X	X	X	X	A	A	X	X	A	X	X	X	X	B	B	B	X	A	X	B	X	X	B	A	B	B	X	A	X	X	A	X	B
GM03:20036084	X	A	X	B	X	X	A	X	X	A	X	X	X	X	B	X	X	X	X	X	A	A	X	X	A	X	X	X	X	B	B	B	X	A	X	B	X	X	B	A	B	B	X	A	X	X	A	X	B
GM03:20238739	X	A	X	B	X	X	A	X	X	A	X	X	X	X	B	X	X	X	X	X	A	A	X	X	A	X	X	X	X	B	B	B	X	A	X	B	X	X	B	A	B	B	X	A	X	X	A	X	B
GM03:20699741	X	A	X	B	X	X	A	X	X	A	X	X	X	X	B	X	X	X	X	X	A	A	X	X	A	X	X	X	X	B	B	B	X	A	X	B	X	X	B	A	B	B	X	A	X	X	A	X	B
GM03:21612669	X	A	X	B	X	X	A	X	X	A	X	X	X	X	B	X	X	X	X	X	A	A	X	X	A	X	X	X	X	B	B	B	X	A	X	B	X	X	B	A	B	B	X	A	X	X	A	X	B
GM03:24629200	X	A	X	B	X	X	A	X	X	A	X	X	X	X	B	X	X	X	X	X	A	A	X	X	A	X	X	X	X	B	B	B	X	A	X	B	X	X	B	A	B	B	X	A	X	X	A	X	B
GM03:25083164	X	A	X	B	X	X	A	X	X	A	X	X	X	X	B	X	X	X	X	X	A	A	X	X	A	X	X	X	X	B	B	B	X	A	X	B	X	X	B	A	B	B	X	A	X	X	A	X	B
GM03:25921191	X	A	X	B	X	X	A	X	X	A	X	X	X	X	B	X	X	X	X	X	A	A	X	X	A	X	X	X	X	B	B	B	X	A	X	B	X	X	B	A	B	B	X	A	X	X	A	X	B
GM03:26426762	X	A	X	B	X	X	A	X	X	A	X	X	X	X	B	X	X	X	X	X	X	A	X	X	A	X	X	X	X	B	B	B	X	A	X	B	X	X	B	A	B	B	X	A	X	X	A	X	B
GM03:33692834	X	A	X	B	X	X	A	X	X	A	X	B	X	X	B	X	B	X	X	X	X	A	X	X	A	X	X	X	X	B	B	B	X	A	X	B	X	B	B	A	B	B	X	X	X	X	A	X	X
GM03:33944685	A	A	X	B	X	X	A	X	X	A	X	B	X	X	B	X	B	X	X	X	X	A	X	X	A	A	X	X	X	B	B	B	X	A	X	B	X	B	B	X	B	B	X	X	X	X	A	X	X
GM03:33944817	A	A	X	B	X	X	A	X	X	A	X	B	X	X	B	X	B	X	X	X	X	A	X	A	A	A	X	X	X	B	B	B	X	A	X	B	X	B	B	X	B	B	X	X	X	X	A	X	X
GM03:34033383	A	A	X	X	X	X	A	X	X	A	X	B	X	X	B	X	B	X	A	X	X	A	X	A	A	A	X	X	X	B	B	B	X	A	X	B	X	B	B	X	B	B	X	X	X	X	A	X	X
GM03:34034186	A	A	X	X	X	X	A	X	X	A	A	B	X	X	B	X	B	X	A	X	X	A	X	A	A	A	X	X	X	B	B	B	X	A	X	B	X	B	B	X	B	B	X	X	X	X	A	X	X
GM03:34306126	A	A	B	X	X	X	A	X	X	A	A	B	X	X	B	X	B	X	A	X	X	A	X	A	A	A	X	X	X	B	B	B	X	A	X	B	X	B	B	X	B	B	X	X	X	X	A	X	X
GM03:34443325	X	A	B	X	X	X	A	X	X	A	A	B	X	X	B	X	B	X	A	X	X	X	X	X	X	A	X	X	X	B	B	B	X	A	X	B	X	B	B	X	B	B	X	X	X	X	A	X	X
GM03:36136046	X	A	B	X	X	X	B	X	A	A	X	B	X	X	A	X	B	X	A	X	X	X	X	X	X	A	B	B	X	B	B	B	X	A	X	B	X	X	X	X	B	B	X	X	X	X	A	X	X
GM03:36157751	X	A	B	X	X	X	B	X	A	A	X	B	X	X	A	X	B	X	A	X	X	X	X	X	X	A	B	B	X	B	B	B	X	A	X	B	X	X	X	X	B	B	X	X	X	X	A	X	X
GM03:36255495	X	A	B	X	X	X	B	X	A	A	X	B	X	X	A	X	A	X	X	X	X	X	X	X	X	A	B	B	X	B	B	B	X	A	X	B	X	X	X	X	B	B	X	X	X	X	A	X	X
GM03:36309302	X	A	B	X	X	X	B	X	A	A	X	B	X	X	A	B	A	X	X	X	X	X	X	X	X	A	B	B	X	B	B	B	X	X	X	B	X	X	X	X	B	B	X	X	X	X	A	X	X
GM03:37191690	X	A	B	X	X	X	B	X	A	A	X	B	X	X	A	B	A	B	X	X	X	X	X	X	X	A	B	B	X	A	X	B	X	X	X	B	X	X	X	X	B	X	X	X	X	X	A	X	X
GM03:37331596	X	A	B	X	X	X	B	X	A	A	X	B	X	X	A	B	A	B	X	X	X	X	X	X	X	A	B	B	X	A	X	B	X	X	X	B	X	X	X	X	B	X	X	X	X	X	A	X	A
GM03:37536711	X	A	B	X	X	X	B	X	A	B	X	B	X	X	A	B	A	B	X	X	X	X	X	X	X	A	B	B	X	A	X	B	X	X	X	B	X	X	X	X	B	X	X	X	X	X	A	X	A
GM03:37617293	X	A	B	X	X	X	B	X	A	B	X	B	X	X	A	B	A	B	X	X	X	X	X	X	X	A	B	B	X	A	X	B	X	X	X	B	X	X	X	X	B	X	X	X	X	X	A	X	A
GM03:37617958	X	A	B	X	X	X	B	X	A	B	X	B	X	X	A	B	A	B	X	X	X	X	X	X	X	A	B	B	X	A	X	B	X	X	X	B	X	X	X	X	B	X	X	X	X	X	A	X	A
GM03:38305381	X	A	B	X	X	X	B	X	A	B	X	B	X	X	X	B	A	B	X	X	X	X	X	X	X	A	B	X	X	A	X	B	X	X	X	B	X	X	X	X	B	X	X	X	X	X	A	X	A
GM03:38325793	X	A	B	X	X	X	B	A	A	B	X	B	X	X	X	B	A	B	X	X	X	X	X	X	X	A	B	X	X	A	X	B	X	X	X	B	X	X	X	X	B	X	X	X	X	X	A	X	A
GM03:38354500	X	A	B	X	X	X	B	A	A	B	X	B	X	B	X	B	A	B	X	X	X	X	X	X	X	A	B	X	X	A	X	B	X	X	X	B	X	X	X	X	B	X	X	X	X	X	A	X	A
GM03:38579657	X	A	B	X	X	X	B	A	A	B	X	B	X	B	X	B	A	B	X	X	X	X	X	X	X	A	B	X	X	A	X	B	X	X	X	B	X	X	X	X	X	X	X	X	X	X	A	X	A
GM03:38753965	X	A	B	X	X	X	B	A	A	B	A	B	X	B	X	B	A	B	X	X	X	X	X	X	X	A	B	X	X	A	X	B	X	X	X	B	X	X	X	X	X	X	X	X	X	X	A	X	A
GM03:39202965	X	A	B	X	X	X	B	A	A	B	A	B	X	B	X	B	A	B	X	X	X	X	X	X	X	A	B	X	X	A	X	B	X	X	X	B	X	X	X	X	X	X	X	X	X	X	A	X	A
GM03:39263061	X	A	B	X	X	X	B	A	A	B	A	B	X	B	X	B	A	B	X	X	X	X	X	X	X	A	B	X	X	A	X	B	X	X	X	B	X	X	X	X	X	X	X	X	X	X	A	X	A
GM03:39427380	X	A	B	X	X	X	B	A	A	B	A	B	X	B	X	B	A	B	X	X	X	X	X	X	X	A	B	X	X	A	X	X	X	X	X	B	X	X	X	X	X	X	X	X	X	X	A	X	A
GM03:39584080	X	A	B	X	X	X	B	A	A	B	A	B	X	B	X	B	A	B	X	X	X	X	X	X	X	X	B	X	X	X	X	X	X	X	X	B	X	X	X	X	X	X	X	X	X	X	A	B	A
GM03:39793984	X	A	B	X	X	X	B	A	A	B	A	B	X	B	X	B	A	B	X	X	X	X	X	X	X	X	B	X	X	X	X	X	X	X	X	B	X	X	X	X	X	X	X	X	X	X	A	B	A
GM03:39806458	X	A	B	X	X	X	B	A	A	B	A	B	A	B	X	B	A	B	X	X	X	X	X	X	X	X	B	X	X	X	X	X	X	X	X	B	X	X	X	X	X	X	X	X	X	X	A	B	A
GM03:39995154	X	A	B	X	X	X	B	A	A	B	A	B	A	B	X	B	A	B	X	X	X	X	X	X	X	X	B	X	X	X	X	X	X	X	X	B	X	X	X	X	X	X	X	X	X	X	A	B	A
GM03:40215848	X	X	B	X	X	X	B	A	A	B	A	B	A	B	X	B	A	B	X	X	X	X	X	X	X	X	B	X	X	X	X	X	X	X	X	B	X	X	X	X	X	X	X	X	X	X	A	B	A
GM03:42022874	B	X	B	X	X	B	B	A	X	B	A	B	A	B	B	B	A	X	B	X	X	X	X	X	X	X	B	X	X	X	X	X	X	X	X	B	X	X	X	X	X	X	X	X	X	X	A	B	X
GM03:42319139	B	X	X	X	X	B	B	A	X	B	A	B	A	B	B	B	A	X	B	X	A	X	X	B	X	X	X	X	X	X	X	X	X	A	X	B	X	X	X	X	A	X	X	X	X	X	A	B	X
GM03:42627019	B	X	X	X	A	B	B	A	X	B	A	B	A	B	B	B	A	X	B	X	A	X	A	B	B	X	X	X	X	X	X	X	X	A	X	B	X	X	X	X	A	X	X	A	X	A	A	B	X
GM03:42645359	B	X	X	X	A	B	B	A	X	B	A	B	A	B	B	B	A	X	B	X	A	X	A	B	B	X	X	X	X	X	X	X	X	A	X	B	X	X	X	X	A	X	X	A	X	A	A	B	X
GM03:42916780	B	X	X	X	A	B	B	A	X	B	A	B	A	B	B	B	A	X	B	X	A	X	A	B	B	X	X	X	X	X	X	X	B	A	X	B	X	X	X	X	A	X	X	A	X	A	A	B	X
GM03:42978112	B	X	X	X	A	B	B	A	X	B	A	B	A	B	B	B	A	X	B	X	A	X	A	B	B	X	X	X	A	X	X	X	B	A	X	B	X	X	X	X	A	X	X	A	X	A	A	B	X
GM03:43149214	B	X	X	X	A	B	B	A	X	B	A	B	A	B	B	B	A	X	B	X	A	B	A	B	B	X	X	X	A	X	X	X	B	A	X	B	X	X	X	X	A	X	X	A	X	A	A	B	X
GM03:43616850	B	X	X	X	A	B	B	A	X	B	A	B	A	B	B	B	A	X	B	X	A	B	A	B	B	X	X	X	A	X	X	X	B	A	X	B	X	X	X	X	A	X	X	A	X	A	A	B	X
GM03:43616966	B	X	X	X	A	B	B	A	X	B	A	B	A	B	B	B	A	X	B	X	A	B	A	B	B	X	X	X	A	X	X	X	B	A	X	B	X	X	X	X	A	X	X	A	X	A	A	B	X
GM03:43630368	B	X	X	X	A	B	B	A	X	B	A	B	A	B	B	B	X	X	B	X	A	B	A	B	B	X	X	X	A	X	X	X	B	A	X	B	X	X	X	X	A	X	X	A	X	A	A	B	X
GM03:43787585	B	X	X	X	A	B	X	A	X	B	A	B	A	X	B	B	X	X	B	X	A	B	A	X	B	X	X	X	A	X	X	X	B	A	X	X	X	X	X	B	A	X	X	A	B	A	A	B	X
GM03:43832084	B	X	X	X	A	B	B	A	X	B	A	B	A	B	B	B	X	X	B	X	A	B	A	B	B	X	X	X	A	X	X	X	B	A	X	B	X	X	X	X	A	X	X	A	X	A	A	B	X
GM03:43844882	B	X	X	X	A	B	B	A	X	B	A	B	A	B	B	B	X	X	B	X	A	B	A	B	B	X	X	X	A	X	X	X	B	A	X	B	X	X	A	X	A	X	X	A	X	A	A	B	X
GM04:466751	A	B	X	B	B	X	X	X	B	B	X	A	B	X	X	B	B	A	X	X	X	A	A	B	B	A	A	B	X	X	X	B	X	B	X	B	A	A	X	B	X	X	B	B	B	B	B	X	B
GM04:1252373	A	B	X	X	B	X	X	X	B	B	X	A	X	A	X	B	X	A	X	X	X	A	A	B	B	A	A	X	X	X	X	B	X	B	X	B	A	A	X	B	X	X	B	X	B	B	B	X	B
GM04:1404047	A	B	X	X	B	X	X	X	B	B	X	A	X	A	X	B	X	A	A	X	X	A	A	B	B	A	A	A	X	X	X	B	X	B	X	B	A	A	X	B	X	X	B	X	B	B	B	X	B
GM04:1408537	A	B	X	X	B	X	X	X	B	B	X	A	B	A	X	X	X	A	B	X	X	X	A	B	B	A	X	X	X	X	X	X	X	B	X	B	A	A	X	X	X	B	B	B	B	B	B	B	B
GM04:2984076	A	B	X	X	B	X	X	X	B	B	X	A	B	A	A	X	X	A	B	X	X	X	A	B	B	A	X	X	X	X	X	X	A	A	X	B	B	A	X	X	A	B	B	B	B	B	B	B	B
GM04:3023501	A	B	X	X	B	X	X	X	B	B	X	A	B	X	A	X	X	A	B	X	X	X	A	B	B	A	X	X	X	X	X	X	A	A	X	B	B	A	X	X	A	B	B	B	B	B	B	B	B
GM04:3316780	A	B	X	X	B	X	X	X	B	B	X	A	B	X	A	X	X	A	B	X	X	X	A	B	B	A	X	X	X	X	X	X	A	A	X	A	B	A	X	X	A	B	B	B	B	B	X	B	B
GM04:3546938	A	B	X	X	B	X	X	X	B	B	X	A	B	X	A	X	X	A	B	X	X	X	A	B	B	A	X	X	X	X	X	X	A	A	X	A	B	A	X	X	A	B	B	B	B	B	X	B	B
GM04:3759591	A	B	X	X	B	X	X	X	B	B	X	A	B	X	A	X	X	A	B	X	X	X	A	B	B	A	X	X	X	X	X	X	A	A	X	A	B	A	X	X	A	B	B	B	B	B	X	B	B
GM04:4093911	A	B	X	X	B	X	X	X	X	B	X	A	B	X	A	X	X	A	B	X	X	X	A	B	B	A	X	X	X	X	X	X	A	A	X	A	B	A	X	X	A	B	B	B	B	B	X	B	B
GM04:4101799	A	B	X	X	B	X	X	X	X	B	X	A	B	X	A	X	X	A	B	X	X	X	A	B	B	A	X	X	X	X	X	X	A	A	X	A	B	A	X	X	A	B	B	B	B	B	X	B	B
GM04:4185355	A	B	X	X	B	X	X	X	X	B	X	A	B	X	A	X	X	A	B	X	X	X	A	B	B	A	X	X	X	X	X	X	A	A	X	A	B	A	X	X	A	B	B	B	B	B	X	B	B
GM04:4404513	A	B	X	X	B	X	X	X	X	B	X	A	B	X	A	X	X	A	B	X	X	X	A	B	B	A	X	X	X	X	X	X	A	A	X	A	B	A	X	X	A	B	B	B	B	B	X	B	B
GM04:4457961	A	B	X	X	B	X	X	X	X	B	X	A	B	X	A	X	X	A	B	X	X	X	A	B	B	A	X	X	X	X	X	X	A	A	X	A	B	A	X	X	A	B	B	B	B	B	X	B	B
GM04:5294109	A	B	X	X	B	X	X	X	X	B	X	A	B	X	A	X	X	A	B	B	X	X	A	B	B	A	X	X	X	X	X	X	A	A	X	A	B	A	B	X	A	B	B	B	X	B	X	B	B
GM04:5295486	A	B	X	X	B	X	X	X	X	B	X	A	B	X	A	X	X	A	B	B	X	X	A	B	B	A	X	X	X	X	X	X	A	A	X	A	B	A	B	X	A	B	B	B	X	B	X	B	B
GM04:5370329	X	B	X	X	B	X	X	X	X	B	X	A	B	X	A	X	X	A	B	B	X	X	A	B	B	A	X	X	X	X	X	X	A	A	X	A	B	A	B	X	A	B	X	B	X	B	X	B	B
GM04:6353086	X	B	X	X	B	X	X	X	X	X	B	A	B	B	B	X	B	A	B	B	X	X	A	B	B	A	X	X	X	X	X	X	A	X	X	A	B	A	B	X	A	B	X	B	X	B	X	B	X
GM04:7297742	X	X	X	X	B	X	A	X	X	X	B	A	B	B	B	X	B	A	B	B	X	X	X	X	B	A	X	A	X	A	X	X	A	X	X	A	B	A	B	X	A	B	X	B	X	B	A	X	X
GM04:7956020	X	X	X	X	A	B	A	B	X	X	B	A	B	B	B	X	B	A	B	B	X	X	X	X	B	A	A	A	X	A	X	X	B	X	X	A	B	A	B	A	X	B	X	B	X	B	A	X	X
GM04:7990022	X	X	X	X	A	B	A	B	X	X	B	A	B	B	B	X	B	A	B	B	X	X	X	X	B	A	A	A	X	A	X	X	B	X	X	A	B	A	B	A	X	B	X	B	X	B	A	X	X
GM04:8039183	X	X	X	X	A	B	A	B	A	X	B	A	B	B	B	X	B	A	B	B	X	X	X	X	B	A	A	A	X	A	X	X	B	X	X	A	B	A	B	A	X	B	X	B	X	B	A	X	X
GM04:8192408	X	X	X	X	A	B	A	B	A	X	B	A	B	B	B	X	B	A	B	B	X	X	X	X	B	A	A	A	X	A	B	X	B	X	X	A	B	A	B	A	X	B	X	B	X	X	A	X	X
GM04:8270155	X	X	X	X	A	B	A	B	A	X	B	X	B	B	B	X	B	A	B	B	X	X	X	X	B	A	A	A	X	A	B	X	B	X	X	B	B	A	B	A	X	B	X	B	X	X	A	X	X
GM04:8531136	X	X	X	X	A	B	A	B	A	X	B	X	B	B	B	X	B	A	B	B	X	X	X	X	B	A	A	A	X	A	B	X	B	X	X	B	B	A	B	A	X	B	X	B	X	X	A	X	X
GM04:9023796	X	X	X	X	A	B	A	B	A	X	B	X	B	B	B	X	B	A	B	B	X	X	X	X	B	A	A	A	X	A	B	X	B	X	X	B	B	A	B	A	X	B	X	B	X	X	A	X	X
GM04:9031250	X	X	X	X	A	B	A	B	A	X	B	X	B	B	B	X	B	A	B	B	X	X	X	X	B	A	A	A	X	A	B	X	B	X	X	B	B	A	B	A	X	B	X	B	X	X	A	X	X
GM04:9115728	X	X	X	X	A	B	A	B	A	X	B	X	B	B	B	X	B	A	B	B	X	X	X	X	B	A	A	A	X	A	B	X	B	X	X	B	B	A	B	A	X	B	X	B	X	X	A	X	X
GM04:9230671	X	A	X	X	A	B	A	B	A	X	B	X	B	B	B	X	B	A	B	B	X	X	X	X	B	A	A	A	X	A	B	X	B	X	X	B	B	A	B	A	X	B	X	B	X	X	A	X	X
GM04:9516901	X	A	X	X	A	B	A	B	A	X	B	X	B	B	B	X	B	A	B	B	X	X	X	X	B	A	A	A	X	A	B	X	B	X	X	B	B	A	B	A	X	B	X	B	X	X	A	X	X
GM04:9599512	X	A	X	X	A	B	X	B	A	X	B	X	B	B	B	X	B	A	B	B	X	X	X	X	B	A	A	A	X	A	B	X	B	X	X	B	B	A	B	A	X	B	X	B	X	X	A	X	X
GM04:9726940	X	A	X	X	A	B	X	B	A	X	B	X	B	B	B	X	B	A	B	B	X	X	X	X	B	A	A	A	X	A	B	X	B	X	X	B	B	A	B	A	X	B	X	B	X	X	A	X	X
GM04:9937051	X	A	X	X	A	B	X	B	A	X	B	X	B	B	B	X	X	A	B	B	X	X	X	X	B	A	A	A	X	A	B	X	B	X	X	B	B	A	B	A	X	B	X	B	X	X	A	X	X
GM04:9943894	X	A	X	X	A	B	X	B	A	X	B	X	B	B	B	X	X	A	B	B	X	X	X	X	B	A	A	A	X	A	B	X	B	X	X	B	B	A	B	A	X	B	X	B	X	X	A	X	X
GM04:10151518	X	A	X	X	A	B	X	B	A	X	B	X	B	B	B	X	X	A	B	B	X	X	X	X	B	A	A	A	X	A	B	X	B	X	X	B	B	A	B	A	X	B	X	B	X	X	A	X	X
GM04:10305838	X	A	X	X	A	B	X	B	A	X	B	X	B	B	B	X	X	A	B	B	X	X	X	X	B	A	A	A	X	A	B	X	B	X	X	B	B	A	B	A	X	B	X	B	X	X	A	X	X
GM04:11242090	X	A	X	X	A	B	X	B	A	X	B	X	X	B	B	X	X	A	B	B	X	X	X	X	B	A	A	A	X	A	B	X	B	X	X	B	B	A	B	A	X	B	X	B	X	X	A	X	X
GM04:13518024	X	A	X	X	A	B	X	B	A	X	B	X	X	B	B	X	X	A	B	B	X	X	X	X	B	A	A	A	X	A	B	X	B	X	X	B	B	A	B	A	X	B	X	B	X	X	A	X	X
GM04:13596433	X	A	X	X	A	B	X	B	A	X	B	X	X	B	B	X	X	A	B	B	X	X	X	X	B	A	A	A	X	A	B	X	B	X	X	B	B	A	B	A	X	B	X	B	X	X	A	X	X
GM04:13783944	X	A	X	X	A	B	X	B	A	X	B	X	X	B	B	X	X	A	B	B	X	X	X	X	B	A	A	A	X	A	B	X	B	X	X	B	B	A	B	A	X	B	X	B	X	X	A	X	X
GM04:13804557	X	A	X	X	A	B	X	B	A	X	B	X	X	B	B	X	X	A	B	B	X	X	X	X	B	A	A	A	X	A	B	X	B	X	X	B	B	A	B	A	X	B	X	B	X	X	A	X	X
GM04:14907773	X	A	X	X	A	B	X	B	A	X	B	X	X	B	B	X	X	A	B	B	X	X	X	X	B	A	A	A	X	A	B	X	B	X	X	B	B	A	B	A	X	B	A	B	X	X	A	X	X
GM04:15101645	X	A	X	X	A	B	X	B	A	X	B	X	X	B	B	X	X	A	B	B	X	X	X	X	B	A	A	A	X	A	B	X	B	X	X	B	B	A	B	A	X	B	X	B	X	X	A	X	X
GM04:15937866	X	A	X	X	A	B	X	B	A	X	B	X	X	B	B	X	X	A	B	B	X	X	X	X	B	A	A	A	X	A	B	X	B	X	X	B	B	A	B	A	X	B	X	B	X	X	A	X	X
GM04:16044722	X	A	X	X	A	B	X	B	A	X	B	X	X	B	B	X	X	A	B	B	X	X	X	X	B	A	A	A	X	A	B	X	B	X	X	B	B	A	B	A	B	B	X	B	X	X	A	X	X
GM04:16813857	X	A	X	X	A	B	X	B	A	X	B	X	X	B	B	X	X	A	B	B	X	X	X	X	B	A	A	A	X	A	B	X	B	X	X	B	B	A	B	A	B	B	X	B	X	X	A	X	X
GM04:16974874	X	A	X	X	A	B	X	B	A	X	B	X	X	B	B	X	X	A	B	B	X	X	X	X	B	A	A	A	X	A	B	X	B	X	X	B	B	A	B	A	B	B	X	B	X	X	A	X	X
GM04:17257004	X	A	X	X	A	B	X	B	A	X	B	X	X	B	B	X	X	A	B	B	X	X	X	X	B	A	A	A	X	A	B	X	B	X	X	B	B	A	B	A	B	B	X	B	X	X	A	X	X
GM04:18290664	X	A	X	X	A	B	X	B	A	X	B	X	X	B	B	X	X	A	B	B	X	X	X	X	B	A	A	A	X	A	B	X	B	X	X	B	B	A	B	A	B	B	X	B	X	X	A	X	X
GM04:18293338	X	A	X	X	A	B	X	B	A	X	B	X	X	B	B	X	X	A	B	B	X	X	X	X	B	A	A	A	X	A	B	X	B	X	X	B	B	A	B	A	B	B	X	B	X	X	A	X	X
GM04:19684571	X	A	X	X	A	B	X	B	A	X	B	X	X	B	B	X	X	A	B	B	X	X	X	X	B	A	A	A	X	A	B	X	B	X	X	B	B	A	B	A	B	B	X	B	X	X	A	X	X
GM04:19954759	X	A	X	X	A	B	X	B	A	X	B	X	X	B	B	X	X	A	B	B	X	X	X	X	B	A	A	A	X	A	B	X	B	X	X	B	B	A	B	A	B	B	X	B	X	X	A	X	X
GM04:20000416	X	A	X	X	A	B	X	B	A	X	B	X	X	B	B	X	X	A	B	B	X	X	X	X	B	A	A	A	X	A	B	X	B	X	X	B	B	A	B	A	B	B	X	B	X	X	A	X	X
GM04:20251662	X	A	X	X	A	B	X	B	A	X	B	X	X	B	B	X	X	A	B	B	X	X	X	X	B	A	A	A	X	A	B	X	B	X	X	B	B	A	B	A	B	B	X	B	X	X	A	X	X
GM04:20728581	X	A	X	X	A	B	X	B	A	X	B	X	X	B	B	X	X	A	B	B	X	X	X	X	B	A	A	A	X	A	B	X	B	X	X	B	B	A	B	A	B	B	X	B	X	X	A	X	X
GM04:24568644	X	A	X	X	A	B	X	B	A	X	B	X	X	B	B	X	X	A	B	B	X	X	X	X	B	A	A	A	X	A	B	X	B	X	X	B	B	A	B	A	B	B	X	B	X	X	A	X	X
GM04:24743622	X	A	X	X	A	B	X	B	A	X	B	X	X	B	B	X	X	A	B	B	X	X	X	X	B	A	A	A	X	A	B	X	B	X	X	B	B	A	B	A	B	B	X	B	X	X	A	X	X
GM04:29120041	X	A	X	X	A	B	X	B	A	X	B	X	X	B	B	X	X	A	B	B	X	X	X	X	B	A	A	A	X	A	B	X	B	X	X	B	B	A	B	A	B	B	X	B	X	X	A	X	X
GM04:29431393	X	A	X	X	A	B	X	B	A	X	B	X	X	B	B	X	X	A	B	B	X	X	X	X	B	A	A	A	X	A	B	X	B	X	X	B	B	A	B	A	B	B	X	B	X	X	A	X	X
GM04:29444339	X	A	X	X	A	B	X	B	A	X	B	X	X	B	B	X	X	A	B	B	X	X	X	X	B	A	A	A	X	A	B	X	B	X	X	B	B	A	B	A	B	B	X	B	X	X	A	X	X
GM04:29477871	X	A	X	X	A	B	X	B	A	X	B	X	X	B	B	X	X	A	B	B	X	X	X	X	B	A	A	A	X	A	B	X	B	X	X	B	B	A	B	A	B	B	X	B	X	X	A	X	X
GM04:31525671	X	A	X	X	A	B	X	B	A	X	B	X	X	B	B	X	X	A	B	B	X	X	X	X	B	A	A	A	X	A	B	X	B	X	X	B	B	A	B	A	B	B	X	B	X	X	A	X	X
GM04:32093654	X	A	X	X	A	B	X	B	A	X	B	X	X	B	B	X	X	A	B	B	X	X	X	X	B	A	A	A	X	A	B	X	B	X	X	B	B	A	B	A	B	B	X	B	X	X	A	X	X
GM04:32248635	X	A	X	X	A	B	X	B	A	X	B	X	X	B	B	X	X	A	B	B	X	X	X	X	B	A	A	A	X	A	B	X	B	X	X	B	B	A	B	A	B	B	X	B	X	X	A	X	X
GM04:32655808	X	A	X	X	A	B	X	B	A	X	B	X	X	B	B	X	X	A	B	B	X	X	X	X	B	A	A	A	X	A	B	X	B	X	X	B	B	A	B	A	B	B	X	B	X	X	A	X	X
GM04:33214720	X	A	X	X	A	B	X	B	A	X	B	X	X	B	B	X	X	A	B	B	X	X	X	X	B	A	A	A	X	A	B	X	B	X	X	B	B	A	B	A	B	B	X	B	X	X	A	X	X
GM04:33767229	X	A	X	X	A	B	X	B	A	X	B	X	X	B	B	X	X	A	X	B	X	X	X	X	B	A	A	A	X	A	B	X	B	X	X	B	B	A	B	A	B	B	X	B	X	X	A	X	X
GM04:36184660	X	A	X	X	A	B	X	B	A	X	B	X	X	B	B	X	X	A	X	B	X	X	X	X	B	A	A	A	X	A	B	X	B	X	X	B	B	A	B	A	B	B	A	B	X	X	A	X	X
GM04:36392421	X	A	X	X	A	B	X	B	A	X	B	X	X	B	B	X	X	A	X	B	X	A	X	X	B	A	A	A	X	A	B	X	B	X	X	B	B	A	B	A	B	B	A	B	X	X	A	X	X
GM04:36499381	X	A	X	X	A	B	X	B	A	X	B	X	X	B	B	X	X	A	X	B	X	A	X	X	B	A	A	A	X	A	B	X	B	X	X	B	B	A	B	A	B	B	X	B	X	X	A	X	X
GM04:36941521	X	A	X	X	A	B	X	B	A	X	B	X	X	B	B	X	X	A	X	B	X	X	X	X	B	A	A	A	X	A	B	X	B	X	X	B	B	A	B	A	B	B	X	B	X	X	A	X	X
GM04:36950408	X	A	X	X	A	B	X	B	A	X	B	X	X	B	B	X	X	A	X	B	X	X	X	X	B	A	A	A	X	A	B	X	B	X	A	B	B	A	B	A	B	B	X	B	X	X	A	X	X
GM04:37418625	X	A	X	X	A	B	X	B	A	X	B	X	X	B	B	X	X	A	X	B	X	X	X	X	B	A	A	A	X	A	B	X	B	X	X	B	B	A	B	A	B	B	X	B	X	X	A	X	X
GM04:37659105	X	A	X	X	A	B	X	B	A	X	B	X	X	B	B	X	X	A	X	B	X	X	X	X	B	A	A	A	X	A	B	X	B	X	X	B	B	A	B	A	B	B	X	B	X	X	A	X	X
GM04:39900682	X	A	X	X	A	B	X	B	A	X	B	X	X	B	B	X	X	A	X	B	X	X	X	X	B	A	A	A	X	A	B	X	B	X	X	B	B	A	B	A	B	B	X	B	X	X	A	X	X
GM04:40051633	X	A	X	X	A	B	X	B	A	X	B	X	X	B	B	X	X	A	X	B	X	X	X	X	B	A	A	A	X	A	B	X	B	X	X	B	B	A	B	A	B	B	X	B	X	X	A	X	X
GM04:40206770	X	A	X	X	A	B	X	B	A	X	B	X	X	B	B	X	X	A	X	B	X	X	X	X	B	A	A	A	X	A	B	X	B	X	X	B	B	A	B	A	B	B	X	B	X	X	A	X	X
GM04:41047932	X	A	X	X	A	B	X	B	A	X	B	X	X	B	B	X	X	A	X	B	X	X	X	X	B	A	A	A	X	A	B	X	B	X	X	B	B	A	B	A	B	B	X	B	X	X	A	X	X
GM04:41130680	X	A	X	X	A	B	X	B	A	X	B	X	X	B	B	X	X	A	X	B	X	X	X	X	B	A	A	A	X	A	B	X	B	X	X	B	B	A	B	A	B	B	X	B	X	X	A	X	X
GM04:41497045	X	A	X	X	A	B	X	B	A	X	B	X	X	B	B	X	X	A	X	B	X	X	X	X	B	A	A	A	X	A	B	X	B	X	X	B	B	A	B	A	B	B	X	B	X	X	A	X	X
GM04:41808599	X	A	X	X	A	B	X	B	A	X	B	X	X	B	B	X	X	A	X	B	X	X	X	X	B	A	A	A	X	A	B	X	B	X	X	B	B	A	B	A	B	B	X	B	X	X	A	X	X
GM04:42156365	X	A	X	X	A	B	X	B	A	X	B	X	X	B	B	X	X	A	X	B	X	X	X	X	B	A	A	X	X	A	B	X	B	X	X	B	B	A	B	A	B	B	X	B	X	X	A	X	X
GM04:43488819	X	A	X	X	A	B	X	B	A	X	B	X	X	B	B	X	X	A	X	B	X	X	X	X	B	A	A	X	X	A	B	X	B	X	X	B	B	A	B	A	B	B	B	B	X	X	A	X	X
GM04:43887046	X	A	X	X	A	B	X	B	A	X	B	X	X	B	B	X	X	A	X	B	X	X	X	X	B	A	A	X	X	A	B	X	B	B	X	B	B	A	B	A	B	B	B	B	X	X	A	X	X
GM04:44203750	X	A	X	X	A	B	X	B	A	X	B	X	X	B	B	X	X	X	X	B	X	X	X	X	X	A	A	X	X	A	B	X	B	B	X	B	B	A	B	A	B	B	B	X	X	X	A	X	X
GM04:44207070	X	A	X	X	A	B	X	B	A	X	B	X	X	B	B	X	X	X	X	B	X	X	X	X	X	A	A	X	X	A	B	X	B	B	X	B	B	A	B	A	B	B	B	X	X	X	A	X	X
GM04:44364547	X	A	X	X	A	B	X	B	A	X	B	X	X	B	B	X	A	X	X	B	B	X	X	X	X	A	A	X	X	A	B	X	B	B	X	B	B	A	B	A	B	B	B	X	X	X	A	X	X
GM04:44411929	X	A	X	X	A	B	X	B	A	X	B	X	B	B	B	X	A	X	X	B	B	X	X	X	X	A	A	X	X	A	B	X	B	B	X	B	B	A	B	A	B	B	B	X	X	X	A	X	X
GM04:44412086	X	A	X	X	A	B	X	B	A	X	B	X	B	B	B	X	A	X	X	B	B	X	X	X	X	A	A	X	X	A	B	X	B	B	X	B	B	A	B	A	B	B	B	X	X	X	A	X	X
GM04:44424835	X	A	X	X	A	B	X	B	A	X	B	X	B	B	B	X	A	X	X	B	B	X	X	X	X	A	A	X	X	A	B	X	B	B	X	B	B	A	B	A	B	B	B	X	X	X	A	X	X
GM04:44433309	X	A	X	X	A	B	X	B	A	X	B	X	B	B	B	X	A	X	X	B	B	X	X	X	X	A	A	X	X	A	B	X	B	B	X	B	B	A	B	A	B	B	B	X	X	X	A	X	X
GM04:44466502	X	A	X	X	A	B	X	B	A	X	B	X	B	B	B	X	A	X	X	B	B	X	X	X	X	A	A	X	X	A	B	X	B	B	X	B	B	A	B	A	B	B	B	X	X	X	A	X	X
GM04:44668164	X	A	X	X	A	B	X	B	A	X	B	X	B	B	B	X	A	X	X	B	B	X	X	X	X	A	A	X	X	A	B	X	B	B	X	B	B	A	B	A	B	B	B	X	X	X	A	X	X
GM04:44718710	X	A	X	X	A	B	X	B	A	X	B	X	B	B	B	X	A	X	X	B	B	X	X	X	X	A	A	X	B	A	B	X	B	B	X	B	B	A	B	A	B	B	B	X	X	X	A	X	X
GM04:44932003	X	A	X	X	A	B	X	B	A	X	B	X	B	B	B	X	A	X	X	B	B	X	X	X	X	A	A	X	B	A	B	X	B	B	X	B	B	A	B	A	B	B	B	X	B	X	A	X	X
GM04:45357855	X	A	X	X	A	B	X	B	A	X	B	X	B	B	B	X	A	X	X	B	B	X	X	X	X	A	A	X	B	X	B	X	B	B	X	B	B	A	B	A	B	B	B	X	B	X	A	X	X
GM04:45546221	X	A	X	X	A	B	X	B	X	X	B	X	B	B	B	X	X	X	X	B	B	X	X	X	X	A	A	X	B	X	B	X	B	B	X	B	B	A	B	A	B	B	B	X	B	X	A	X	X
GM04:46043483	X	A	X	X	A	B	X	B	X	B	B	B	B	B	B	X	X	X	X	B	B	B	X	X	X	A	A	X	B	X	X	X	B	B	X	B	B	A	B	A	B	B	B	X	B	X	A	X	X
GM04:46154071	X	A	X	X	A	B	X	B	X	B	B	B	B	B	B	X	X	X	A	B	B	B	X	X	X	A	A	X	B	X	X	X	B	B	X	B	B	A	B	A	B	B	B	X	B	X	A	X	X
GM04:46158773	X	A	X	X	A	B	X	B	X	B	B	B	B	B	B	X	X	X	A	B	B	B	X	X	X	A	A	X	B	X	X	X	B	B	X	B	B	A	B	A	B	B	B	X	B	X	A	X	X
GM04:46158919	X	A	X	X	A	B	X	B	X	B	B	B	B	B	B	X	X	X	A	B	B	B	X	X	X	A	A	X	B	X	X	X	B	B	X	B	B	A	B	A	B	B	B	X	B	X	A	X	X
GM04:46242071	X	A	X	X	A	B	X	B	X	B	B	B	B	B	B	X	X	X	A	B	B	B	X	X	X	A	A	X	B	X	X	X	B	B	X	B	B	A	B	A	B	B	B	X	B	X	A	X	X
GM04:46684784	X	A	X	X	A	B	X	B	X	B	B	B	B	B	X	X	X	X	A	B	B	B	X	X	X	A	A	X	B	X	X	X	B	B	X	B	B	A	B	A	B	B	B	X	B	X	A	X	X
GM04:47202095	X	A	X	B	A	B	X	B	X	B	B	B	B	B	X	X	X	X	A	B	X	B	A	X	A	A	A	X	B	X	X	X	B	B	X	X	B	A	B	A	B	B	B	X	B	X	X	X	X
GM04:47264227	X	A	X	B	A	B	X	X	X	B	B	B	B	B	X	X	X	X	A	B	X	B	A	X	A	A	A	X	B	X	X	X	X	B	X	X	B	A	B	A	B	B	B	X	B	X	X	X	X
GM04:47282325	X	A	X	B	A	B	X	X	X	B	B	B	B	B	X	X	X	X	A	B	X	B	A	X	A	A	A	X	B	X	X	X	X	B	X	X	B	A	B	A	B	B	B	X	B	X	X	X	X
GM04:47369068	X	A	X	B	A	B	X	X	X	B	B	B	B	B	X	X	X	X	A	B	X	B	A	X	A	A	A	X	B	X	X	X	X	B	X	X	B	A	A	X	B	X	B	X	B	X	X	X	X
GM04:47514810	X	A	X	B	A	B	X	X	X	B	B	B	B	B	X	X	X	X	A	B	X	B	A	X	A	A	A	X	B	X	X	X	X	B	X	X	B	A	A	X	B	X	B	X	B	X	X	X	X
GM04:47607433	X	A	X	B	A	B	X	X	X	B	B	B	B	B	X	X	X	X	A	B	X	X	A	X	A	A	A	X	B	X	X	X	X	B	X	X	B	A	A	X	B	X	B	X	B	X	X	X	X
GM04:47797940	X	A	X	B	A	B	X	X	X	B	B	B	B	B	X	X	X	A	A	B	X	X	A	X	A	A	A	X	B	X	X	X	X	B	X	X	B	A	A	X	B	X	B	X	B	X	X	X	X
GM04:47883510	X	A	X	B	A	B	X	X	X	B	B	B	B	B	X	X	X	A	A	B	X	X	A	X	A	A	A	X	B	X	X	X	X	B	X	X	B	A	A	X	B	X	B	X	B	X	X	X	X
GM04:48020067	X	A	X	B	A	B	X	X	X	B	B	B	B	B	X	X	X	A	A	B	X	X	A	X	A	A	A	X	B	X	X	X	X	B	X	X	B	A	A	X	B	X	B	X	B	X	X	X	X
GM04:48213080	X	A	X	B	A	B	X	X	B	B	B	B	B	B	X	X	X	A	A	A	X	X	A	X	A	A	A	X	B	X	X	X	X	B	X	X	B	A	A	X	B	X	B	X	B	X	X	X	X
GM04:49018883	X	A	X	B	A	B	A	X	B	B	B	B	B	B	X	X	X	A	A	A	X	X	A	X	A	A	A	X	B	X	X	B	X	B	B	X	B	A	A	X	B	X	B	A	B	X	X	A	X
GM04:49024162	X	A	X	B	A	B	A	X	B	B	B	B	B	B	X	X	A	A	A	A	X	X	A	X	A	A	A	X	B	X	X	B	X	B	B	X	B	A	A	X	B	X	B	A	B	X	X	A	X
GM04:49024259	X	A	X	B	X	B	A	X	B	B	B	B	B	B	X	X	A	A	A	A	X	X	A	X	A	A	A	X	B	X	X	B	X	B	B	X	B	A	A	X	B	X	B	A	B	X	X	A	X
GM04:49026072	X	A	X	B	X	B	A	X	B	B	B	B	B	B	X	X	A	A	A	X	X	X	A	X	A	A	A	X	B	X	X	B	X	B	B	X	B	A	A	X	B	X	B	A	X	X	X	A	X
GM04:49032574	X	A	X	B	X	B	A	X	B	B	B	X	B	X	X	X	A	A	A	X	X	X	A	X	A	A	A	X	B	X	X	B	X	B	B	X	B	A	A	X	B	X	B	A	B	X	X	A	X
GM04:49040330	B	A	X	B	X	B	A	X	B	B	B	B	B	X	B	X	A	A	A	X	X	X	A	X	A	A	A	X	B	X	X	B	X	B	B	X	B	A	A	B	B	X	B	A	X	A	B	A	X
GM04:49102328	X	A	X	B	B	B	A	X	B	B	B	X	B	X	X	X	A	A	A	X	X	X	A	X	A	A	A	X	B	X	X	B	X	B	B	X	B	A	A	A	B	X	B	A	B	X	X	A	X
GM04:49357509	X	A	X	B	B	B	A	A	B	B	B	A	B	X	X	X	A	A	A	X	X	X	A	A	A	A	A	X	B	X	X	B	X	B	B	A	B	A	A	X	B	X	B	A	B	X	X	A	X
GM05:208889	X	A	X	X	B	A	B	A	B	A	X	A	B	A	A	A	A	A	X	X	X	A	B	B	A	X	X	X	A	B	X	X	X	X	B	X	B	X	X	X	X	X	A	X	A	A	A	A	X
GM05:294855	X	A	X	X	B	X	B	A	B	X	X	A	B	A	A	A	A	A	X	X	X	A	B	B	X	X	X	X	A	B	X	X	X	X	B	X	B	X	X	X	X	X	A	X	A	X	A	A	X
GM05:300276	X	A	X	A	B	X	B	A	B	X	A	A	B	A	A	A	A	A	X	X	X	A	B	B	X	X	X	X	A	B	X	X	X	B	B	X	B	X	X	X	X	B	A	X	A	X	A	A	X
GM05:1432320	X	A	X	X	B	X	B	A	B	X	X	A	B	A	A	X	X	A	X	X	X	A	B	B	X	A	X	A	X	B	X	X	X	X	B	X	B	B	B	X	X	X	A	X	A	X	A	A	X
GM05:1455288	X	A	X	X	B	X	B	A	B	X	X	A	B	X	A	X	X	A	X	X	X	A	B	B	X	X	X	X	A	B	X	X	B	X	B	X	B	B	B	X	X	X	X	X	A	X	A	A	X
GM05:1455420	X	A	X	X	B	X	B	A	B	X	X	A	B	X	A	X	X	A	X	X	X	A	B	B	X	X	X	X	X	B	X	X	B	X	B	X	B	B	X	X	X	X	X	X	A	X	A	A	X
GM05:1458512	X	A	X	X	B	X	B	A	B	X	X	A	B	X	A	X	X	A	X	X	X	A	B	B	X	X	X	X	X	B	X	X	B	X	B	X	B	B	B	X	X	X	X	X	A	X	A	A	X
GM05:1523796	X	A	X	X	B	X	B	A	B	X	X	A	B	X	A	X	X	A	X	X	X	A	B	B	X	X	X	X	X	B	X	X	X	X	B	X	B	B	B	X	X	X	X	A	A	X	A	A	X
GM05:1725653	X	A	X	X	B	X	B	A	B	X	X	A	B	X	A	X	X	A	X	X	X	A	B	B	X	X	X	X	X	B	X	X	X	X	B	X	B	B	B	X	X	X	X	A	A	X	A	A	X
GM05:1758390	X	A	X	X	B	X	B	A	B	X	X	A	B	X	A	X	X	A	X	X	X	A	B	B	X	X	X	X	X	B	X	X	X	X	B	X	B	B	B	X	X	X	X	A	A	X	A	A	X
GM05:2338209	X	A	X	X	X	X	B	X	X	X	X	A	B	X	A	X	X	X	X	X	X	A	B	B	X	X	X	B	X	B	X	X	X	X	B	X	B	B	B	X	X	X	X	A	A	X	A	A	X
GM05:2716145	X	A	A	X	X	X	B	X	X	X	X	A	B	X	A	X	X	X	X	X	X	A	B	B	X	X	X	B	B	B	X	X	X	X	B	X	B	B	B	X	X	X	X	A	X	X	A	A	X
GM05:2729581	X	B	A	X	X	X	B	X	X	X	A	A	B	X	A	X	X	X	X	X	X	A	B	B	X	X	X	B	B	B	X	X	X	X	B	X	B	X	B	X	X	X	X	A	X	X	A	A	X
GM05:2743924	X	B	A	X	X	X	B	X	X	X	A	A	B	X	A	X	X	X	X	X	X	A	B	B	X	X	X	B	B	B	X	X	X	X	B	X	B	B	B	X	X	X	X	A	X	X	A	A	X
GM05:2793999	X	B	A	X	X	X	B	X	X	X	A	A	B	X	A	X	X	X	X	X	X	A	B	B	X	X	X	B	B	B	X	X	X	X	B	X	B	B	B	X	X	X	X	A	X	X	A	A	X
GM05:2894334	X	B	A	X	X	X	X	X	X	X	A	A	B	X	A	X	X	X	X	X	X	A	B	B	X	X	X	B	B	B	X	X	X	X	B	X	B	X	B	X	X	X	X	A	X	X	A	A	X
GM05:2989398	X	B	A	X	X	X	X	X	X	X	A	A	B	X	A	X	X	X	X	X	X	A	B	B	X	X	X	B	B	B	X	X	X	X	B	X	B	X	B	X	X	X	X	A	X	X	A	A	X
GM05:3040140	X	B	A	X	X	X	X	X	X	X	A	A	B	X	A	X	X	X	X	X	X	A	B	B	X	X	X	B	B	B	X	X	X	X	B	X	B	X	B	X	X	X	X	A	X	X	A	A	X
GM05:3124214	X	B	A	X	X	X	X	X	X	X	A	A	B	X	A	X	X	X	X	X	X	A	B	B	X	X	X	B	B	B	X	X	X	X	B	X	B	X	B	X	X	X	X	A	X	X	A	A	X
GM05:3167692	X	B	A	X	X	X	X	X	X	X	A	A	B	X	A	X	X	X	X	X	X	A	B	B	X	X	X	B	B	B	X	X	X	X	B	X	B	X	B	X	X	X	X	A	X	X	A	X	X
GM05:3451817	X	B	A	X	X	X	X	X	X	X	A	A	B	X	A	X	X	X	X	X	X	A	B	B	X	X	X	B	B	B	X	X	X	X	B	X	B	X	B	X	X	X	X	A	X	X	A	X	X
GM05:3543164	X	B	A	X	X	X	X	X	X	X	A	A	B	X	A	X	X	X	X	X	X	A	B	B	X	X	X	B	B	B	X	X	X	X	B	X	B	X	B	X	X	X	X	A	X	X	A	X	X
GM05:3584733	X	B	A	X	X	X	X	X	X	X	A	A	B	X	A	X	X	X	X	X	X	A	B	B	X	X	X	B	B	B	X	X	X	X	B	X	B	X	B	X	X	X	X	A	X	X	A	X	X
GM05:3769727	X	B	A	X	X	X	X	X	X	X	A	A	B	A	A	X	X	X	X	X	X	A	B	B	X	X	B	B	B	B	X	X	X	X	B	X	B	X	B	X	X	X	X	A	X	X	A	X	X
GM05:3884649	X	B	A	X	X	X	X	X	X	X	A	A	B	A	A	X	X	X	A	X	X	A	B	B	X	X	B	B	B	B	X	X	X	X	B	X	B	X	B	B	X	X	X	A	X	X	A	X	X
GM05:4392756	X	B	A	X	X	X	X	X	A	X	A	A	B	A	A	X	X	X	A	X	X	A	X	B	X	X	B	B	B	B	X	X	X	X	B	X	B	X	B	B	X	X	X	A	X	X	A	X	X
GM05:31673462	B	X	A	X	A	X	A	X	A	B	A	A	B	B	X	X	X	X	B	X	B	X	X	A	X	X	B	B	B	X	X	X	X	B	B	A	X	X	X	B	X	B	B	A	X	X	A	X	B
GM05:31683329	B	X	A	X	A	X	A	X	A	B	A	A	B	B	X	X	X	X	B	X	B	X	X	A	X	X	B	B	B	X	X	X	X	B	B	A	X	X	X	B	X	B	B	A	X	X	A	X	B
GM05:31686531	B	X	A	X	A	X	A	A	A	B	A	A	B	B	A	X	X	X	B	X	B	X	X	A	X	X	B	B	B	X	X	X	X	B	B	A	X	X	X	B	X	B	B	A	X	X	A	A	B
GM05:31686747	B	X	A	X	A	X	A	A	A	B	A	A	B	B	A	X	X	X	B	X	B	A	X	A	X	X	B	B	B	X	X	X	X	B	B	A	X	X	X	B	X	B	B	A	X	X	A	A	B
GM05:31687142	B	X	A	X	A	X	A	A	A	B	A	A	B	B	X	X	X	X	B	X	B	A	X	A	X	X	B	B	B	X	X	X	X	B	B	A	X	X	X	B	X	B	B	A	X	X	A	A	B
GM05:31712864	B	X	A	X	A	X	A	A	A	B	A	A	B	B	X	X	X	X	B	X	B	X	X	A	X	X	B	B	B	X	X	X	X	B	B	A	X	X	X	B	X	B	B	A	X	X	A	A	B
GM05:31736596	B	X	A	X	A	X	A	A	A	B	A	A	B	B	X	X	X	X	B	X	B	X	X	A	X	X	B	B	B	X	X	X	X	B	B	A	X	X	X	B	X	B	B	A	X	X	A	A	B
GM05:31812218	B	X	A	X	A	X	A	A	A	B	A	A	B	B	X	X	X	X	B	X	B	X	X	A	X	X	B	B	B	X	X	X	X	B	B	A	X	X	X	B	X	B	B	A	X	X	A	A	B
GM05:32121893	B	X	A	X	A	X	A	A	A	B	A	A	B	B	X	X	X	A	B	X	B	X	X	A	X	X	B	B	B	X	X	X	X	B	B	A	X	A	X	B	X	B	B	A	X	X	A	A	B
GM05:32150188	B	X	A	X	A	X	A	A	A	B	A	A	B	B	X	X	X	A	B	X	B	X	X	A	X	X	B	B	B	X	X	X	X	B	B	A	X	A	A	B	X	B	B	A	X	X	A	A	B
GM05:32495014	B	X	A	X	A	X	A	A	A	B	A	A	B	B	X	X	X	A	B	X	B	X	X	A	X	X	B	B	B	X	X	X	X	B	B	A	X	A	A	B	X	B	B	A	X	X	A	A	B
GM05:32834159	B	X	A	X	A	X	A	A	A	B	A	A	B	X	X	X	X	A	B	X	B	X	X	A	X	X	B	B	B	X	X	X	B	B	B	A	X	A	X	B	X	B	B	A	X	X	A	A	B
GM05:33186694	B	X	A	X	A	X	A	A	A	B	A	A	B	X	X	X	X	A	X	X	B	X	X	A	X	X	A	B	A	X	X	B	B	B	B	A	X	A	X	B	X	B	B	A	X	X	A	A	B
GM05:33534214	B	X	A	X	A	X	A	A	A	B	A	A	B	X	B	X	X	A	X	X	B	X	X	A	A	X	A	B	A	X	X	B	B	B	B	A	X	A	A	B	X	B	B	A	X	X	A	A	B
GM05:33929254	B	X	A	X	A	X	A	A	A	B	A	A	B	X	B	X	X	A	X	X	B	X	X	A	A	X	A	B	A	X	X	B	B	B	B	A	X	A	A	B	X	B	B	A	X	X	A	A	B
GM05:33993484	B	X	A	X	A	X	A	A	A	B	A	A	B	X	B	X	X	A	X	X	B	X	X	A	A	X	A	B	A	X	X	B	B	B	B	A	X	A	A	B	X	B	B	A	X	X	A	A	B
GM05:34016840	B	X	A	X	A	X	A	A	A	B	A	A	B	X	B	X	X	A	X	X	B	X	X	A	A	X	A	B	A	X	X	B	B	B	B	A	X	A	A	B	X	B	B	A	X	X	A	A	B
GM05:34019924	B	X	A	X	A	X	A	A	A	B	A	A	B	X	B	X	X	A	X	X	B	X	X	A	A	X	A	B	A	X	X	B	B	B	B	A	X	X	A	B	X	B	B	A	X	X	A	A	B
GM05:34377919	B	X	A	X	A	X	A	A	A	B	A	A	B	X	B	X	X	A	X	X	B	X	X	A	A	X	A	B	A	X	X	B	B	B	B	A	X	X	A	B	X	B	B	A	X	X	A	A	B
GM05:34583367	B	X	A	X	A	X	A	A	A	B	A	A	B	X	B	X	X	A	X	X	B	X	A	A	A	X	A	B	A	X	X	B	B	B	B	A	X	X	A	B	X	B	B	A	X	X	A	A	X
GM05:34583689	B	X	A	X	A	X	A	A	A	B	A	A	B	X	B	X	X	A	X	X	B	X	A	A	A	X	A	B	A	X	X	B	B	B	B	A	X	X	A	B	X	B	B	A	X	X	A	A	X
GM05:34889638	B	X	A	X	A	X	A	A	A	B	A	A	B	X	B	X	X	A	X	X	B	X	A	A	A	X	A	B	A	X	X	B	B	B	B	A	X	X	A	B	X	B	B	A	X	X	A	A	X
GM05:34891839	B	X	A	X	A	X	A	A	A	B	A	A	B	X	B	X	X	A	X	X	B	X	A	A	A	X	A	B	A	X	X	B	B	B	B	A	X	X	A	B	X	B	B	A	X	A	A	A	X
GM05:35117392	B	X	A	X	A	X	A	A	A	B	A	A	B	X	B	X	X	A	X	X	B	X	A	A	A	X	A	X	A	X	X	B	B	B	B	A	X	X	A	B	X	B	B	A	X	A	A	A	X
GM05:35183096	B	X	A	X	A	X	A	A	A	B	A	A	B	X	B	X	X	A	X	X	B	X	A	A	A	X	A	X	A	X	X	B	B	B	B	A	X	X	A	B	X	B	B	A	X	A	A	A	X
GM05:35322851	B	X	A	X	A	X	A	A	A	B	A	A	B	X	B	X	X	A	X	X	B	X	A	A	A	X	A	X	A	A	X	B	B	B	B	A	X	X	A	B	X	B	B	A	X	A	A	A	X
GM05:35419945	B	X	A	X	A	X	A	A	A	B	A	A	B	X	B	X	X	A	X	X	B	X	A	A	A	X	A	X	A	A	X	B	B	B	B	A	X	X	A	B	X	B	B	A	X	A	A	A	X
GM05:35529171	B	X	A	X	A	X	A	A	A	B	A	A	B	X	B	X	X	A	X	X	B	X	A	A	A	X	A	X	A	A	X	B	B	B	B	A	X	X	A	B	X	B	B	A	X	A	A	A	X
GM05:35638613	B	X	A	X	A	X	A	A	A	B	A	A	B	X	B	X	X	A	X	X	B	X	A	A	A	X	A	X	A	A	X	B	B	B	B	A	X	X	A	B	X	B	B	A	X	A	A	A	X
GM05:36108741	B	X	A	X	A	X	A	A	A	B	A	A	B	X	B	X	X	A	X	X	B	X	A	A	B	X	A	X	A	A	X	B	B	B	B	A	B	X	A	B	X	B	B	A	X	A	A	X	X
GM05:36212233	B	X	A	X	A	X	A	A	X	B	A	A	B	X	B	X	X	A	X	X	B	X	A	A	B	X	A	X	A	A	X	B	B	B	B	A	B	X	A	B	X	B	B	X	X	A	A	X	X
GM05:36884835	B	X	A	A	A	X	A	X	X	B	X	A	B	X	B	X	X	A	X	X	B	X	A	A	B	X	A	X	A	A	X	X	B	B	X	A	B	X	A	B	A	B	B	X	X	A	A	X	X
GM05:36953133	B	X	A	A	A	X	A	X	X	B	X	A	B	X	B	X	X	A	X	X	B	X	A	A	B	X	A	X	A	A	X	X	B	B	X	A	B	X	A	B	A	B	B	X	X	A	A	X	X
GM05:37322201	B	X	A	A	A	X	A	X	X	B	X	A	B	X	B	X	X	A	X	X	B	X	A	A	B	X	A	X	A	A	X	X	B	B	X	A	B	X	A	B	A	B	B	X	X	A	A	X	X
GM05:37399928	B	X	A	A	A	X	A	X	X	X	X	A	B	X	B	X	X	A	X	X	B	X	A	A	B	X	A	X	A	A	X	X	B	B	X	X	B	X	A	B	A	B	B	X	X	X	A	X	X
GM05:37701538	B	X	A	A	A	X	A	X	X	X	X	A	B	X	B	X	X	A	X	B	X	A	A	A	B	X	A	X	A	A	X	X	B	B	X	X	B	X	A	B	A	B	X	X	X	X	A	X	X
GM05:37852404	B	X	A	A	A	X	A	X	X	X	X	A	B	X	B	X	X	A	X	B	X	A	A	A	B	X	A	X	A	A	X	X	B	B	X	X	B	X	A	B	A	B	X	A	X	X	A	X	X
GM05:37898601	B	X	A	A	A	X	A	X	X	X	X	A	B	X	B	X	X	A	X	B	X	A	A	A	B	X	A	X	A	A	X	X	B	B	X	X	B	X	A	B	A	B	X	A	X	X	A	X	X
GM05:37910288	B	X	A	A	A	X	A	X	X	X	X	A	B	X	B	X	X	A	X	B	X	A	A	A	B	X	A	X	A	A	X	X	B	B	X	X	B	X	A	B	A	B	X	A	X	X	A	X	X
GM05:38010565	B	X	X	A	A	X	A	X	X	X	X	A	B	X	B	X	X	A	X	B	X	A	A	A	B	X	A	X	A	A	X	X	B	B	X	X	B	X	A	B	A	B	X	A	X	X	A	X	X
GM05:38062393	B	X	X	A	A	X	A	X	X	X	X	A	B	X	B	X	X	A	X	B	X	A	A	A	B	X	A	X	A	A	X	X	B	B	X	X	B	X	A	B	A	B	X	A	X	X	A	X	X
GM05:38063211	B	X	X	A	A	X	A	X	X	X	X	A	B	X	A	X	X	A	X	B	X	A	A	A	B	X	A	X	A	A	X	X	B	B	X	X	B	X	A	B	A	B	X	A	X	X	A	X	X
GM05:38065221	B	X	X	A	A	X	A	X	X	X	X	A	B	X	A	X	X	A	X	B	X	A	A	A	B	X	A	X	A	A	X	X	B	B	X	X	B	X	A	B	A	B	X	A	X	X	A	X	X
GM05:38217747	B	X	X	A	A	X	A	X	X	X	X	A	B	X	A	X	X	A	X	B	X	A	X	A	B	X	A	X	A	A	X	X	B	B	X	X	B	X	A	B	A	B	X	A	X	X	A	X	X
GM05:38440675	B	X	X	A	A	B	A	X	B	X	X	A	B	X	A	X	X	X	X	B	X	A	X	A	B	X	A	X	A	A	X	X	B	B	X	X	B	X	A	B	A	B	X	A	X	X	A	X	X
GM05:39265581	B	X	X	A	A	B	A	X	B	X	B	A	B	X	A	X	X	X	B	B	X	A	X	A	B	X	A	X	A	X	X	X	B	B	X	X	B	X	A	B	A	B	X	A	X	X	A	X	A
GM05:39360611	B	X	X	A	A	B	A	X	B	X	B	A	B	X	A	X	X	X	B	B	X	A	X	A	B	X	A	X	A	X	X	X	B	B	X	X	B	X	A	B	A	A	X	A	X	X	A	X	A
GM05:39363243	B	X	X	A	A	B	A	X	B	X	B	A	B	X	A	X	X	X	B	B	X	A	X	A	B	X	A	X	A	X	X	X	B	B	X	X	B	X	A	B	A	A	X	A	X	X	A	X	A
GM05:39364738	B	X	X	A	A	B	A	X	B	X	B	A	X	X	A	X	X	X	B	B	X	A	X	A	B	X	A	X	A	X	X	X	B	B	X	X	B	X	A	B	A	A	X	A	X	X	A	X	A
GM05:39594374	B	B	X	A	A	B	A	X	B	X	B	A	X	X	A	X	X	X	B	B	X	A	X	A	B	X	A	X	A	X	X	X	B	B	X	X	B	X	A	B	A	A	X	A	X	X	A	X	A
GM05:39809905	B	B	X	A	A	B	A	X	B	X	B	A	X	X	A	X	X	X	B	B	X	A	X	A	B	B	A	X	A	X	X	X	B	B	X	X	B	X	A	B	A	A	X	A	X	X	A	X	A
GM05:40147705	B	B	X	A	A	B	A	X	B	X	B	A	X	X	A	X	X	X	B	B	X	A	X	A	B	B	A	X	A	X	X	X	B	B	X	X	B	X	A	B	A	A	X	A	X	X	A	X	A
GM05:40163881	B	B	X	A	A	B	A	X	B	X	B	A	X	X	A	X	X	X	B	B	X	A	X	A	B	B	A	X	A	X	X	X	B	B	X	X	B	X	A	B	A	A	X	A	X	X	A	X	A
GM05:40209527	B	B	X	A	A	B	A	X	B	X	B	A	X	X	A	X	X	X	B	B	X	A	X	A	B	B	A	X	A	X	X	X	B	B	X	X	B	X	A	B	A	A	X	A	X	X	A	X	A
GM05:40349707	B	X	X	A	A	B	A	X	B	X	B	A	X	X	A	X	X	X	B	B	X	A	X	A	B	B	A	X	X	X	X	X	B	B	X	X	B	X	A	B	A	A	X	X	X	X	A	X	A
GM05:40467080	B	X	X	A	A	B	A	X	B	X	B	A	X	X	A	X	B	X	B	B	X	A	X	A	B	B	A	X	X	X	X	X	B	B	X	X	B	X	A	B	A	A	X	X	X	X	A	X	A
GM05:40500257	B	X	X	A	A	B	A	X	B	X	B	A	X	X	A	X	B	X	B	B	X	A	X	A	B	B	A	X	X	X	X	X	B	B	X	X	B	X	A	B	A	A	X	X	X	X	A	X	A
GM05:40502988	B	X	X	A	A	B	A	X	B	X	B	A	X	X	A	X	X	X	B	B	X	A	X	A	B	B	A	X	X	X	X	X	B	B	X	X	B	X	A	B	A	A	X	X	X	X	A	X	A
GM05:41392627	B	X	X	A	A	B	X	X	B	A	B	X	X	X	A	X	B	X	B	B	X	A	X	X	B	X	A	X	X	X	X	X	B	B	X	X	B	X	A	X	A	A	X	X	X	X	A	X	A
GM05:41415752	B	X	X	A	A	B	X	X	B	A	B	X	X	X	A	X	X	X	B	B	X	A	X	X	B	X	A	X	X	X	X	X	B	B	X	X	B	X	A	X	A	A	X	X	X	X	A	X	A
GM06:40180	X	X	X	A	B	X	B	B	A	A	B	X	X	A	X	B	A	X	X	A	X	B	X	B	X	X	X	A	X	X	A	X	B	A	X	X	X	B	A	B	A	A	B	A	X	A	A	X	X
GM06:48114	X	X	X	A	B	X	B	B	A	A	B	X	X	A	X	B	B	X	X	A	X	B	X	B	X	X	X	A	X	X	A	X	B	A	X	X	X	B	A	B	A	A	B	A	X	A	A	X	X
GM06:105140	X	X	X	A	B	X	B	B	A	A	B	X	X	A	X	B	X	X	X	A	X	B	X	B	X	X	X	A	X	X	A	X	B	A	X	X	X	B	A	B	A	A	B	A	X	A	A	X	X
GM06:388148	B	B	X	A	B	X	B	B	A	A	B	B	A	A	X	B	X	A	B	A	X	B	X	B	B	X	B	A	X	X	A	X	B	A	X	X	X	B	A	B	A	A	B	A	X	A	A	B	X
GM06:398493	X	X	X	A	B	X	B	B	A	A	B	X	A	A	X	B	X	X	X	A	X	B	X	B	X	X	X	A	X	X	A	X	B	A	X	X	X	B	A	B	A	A	B	A	X	A	A	X	X
GM06:414408	X	X	X	A	B	X	B	B	A	A	B	X	A	A	X	B	X	X	X	A	X	B	X	B	X	X	X	A	X	X	A	X	B	A	X	X	X	B	A	B	A	A	B	A	X	A	A	X	X
GM06:461691	X	X	X	A	B	A	B	B	A	A	B	X	A	A	X	B	X	X	X	A	X	B	X	B	X	X	X	A	X	X	A	X	B	A	X	X	X	B	A	B	A	A	B	A	X	A	A	X	X
GM06:674991	X	X	X	A	B	A	B	B	A	A	B	X	A	A	X	B	X	X	X	A	X	B	X	B	X	X	X	A	X	X	A	X	B	A	X	X	X	B	A	B	A	A	B	A	X	A	A	X	X
GM06:801649	X	X	X	X	B	A	B	B	A	A	B	X	A	A	X	B	X	X	X	A	X	B	X	B	X	X	X	A	X	X	A	X	B	A	X	X	X	B	A	B	A	A	B	A	X	A	A	X	X
GM06:836186	X	X	X	X	B	A	B	B	A	A	B	X	A	A	X	B	X	X	X	A	X	B	X	B	X	X	X	A	X	X	A	X	B	A	X	X	X	B	A	B	A	A	B	A	X	A	A	X	X
GM06:941554	X	X	X	X	B	A	B	B	A	A	B	X	A	A	X	B	X	X	X	A	X	B	X	B	X	X	X	A	X	X	A	X	B	A	X	X	X	B	A	B	A	A	B	A	X	A	A	X	X
GM06:1026758	X	X	X	X	B	A	B	B	A	A	B	X	A	A	X	B	X	X	X	A	X	B	X	B	X	X	X	A	X	X	A	X	B	A	X	X	X	B	A	B	A	A	B	A	X	A	A	X	X
GM06:1077486	X	X	X	X	B	A	B	B	A	A	B	X	A	A	X	X	X	X	X	A	X	B	X	B	X	X	X	A	X	X	A	X	B	A	X	X	X	B	A	B	A	A	B	A	X	A	A	X	X
GM06:1119959	X	X	X	X	B	A	B	B	A	A	B	X	A	A	X	B	X	X	X	A	X	B	X	B	X	X	X	A	X	X	A	X	B	A	X	X	X	B	A	B	A	A	B	A	X	A	A	X	X
GM06:1673727	X	X	X	B	B	A	B	B	A	A	B	X	A	A	X	X	X	B	X	A	X	X	X	B	X	X	X	A	X	X	A	X	B	A	X	X	X	B	A	X	A	A	B	A	X	A	A	X	X
GM06:1822142	X	X	X	B	B	A	B	B	A	A	B	X	A	A	X	X	X	B	X	A	X	X	X	A	X	X	X	A	X	X	X	X	B	A	X	X	X	B	A	X	X	A	B	A	X	A	A	X	X
GM06:1948936	X	X	X	B	B	X	B	B	A	A	B	X	A	A	X	X	X	B	X	A	X	X	X	A	X	X	X	A	X	X	X	A	B	X	X	X	X	B	A	X	X	A	B	A	X	A	X	X	X
GM06:6069381	A	X	B	B	B	X	X	B	A	A	B	X	B	A	X	X	X	B	X	B	A	X	X	A	B	X	X	A	X	X	X	A	X	X	X	X	X	B	A	B	X	A	B	A	X	A	X	A	X
GM06:6074818	A	X	B	B	B	X	X	B	A	A	B	X	B	X	X	X	X	B	X	B	A	X	X	A	B	X	X	A	X	A	X	A	X	X	X	X	X	B	A	B	X	A	B	A	X	A	X	A	X
GM06:6281531	A	X	B	B	B	X	X	B	A	A	B	X	B	X	X	X	X	B	X	B	A	X	X	A	B	X	X	A	X	A	X	A	X	X	X	X	X	A	A	B	X	A	B	X	X	A	X	A	X
GM06:6282205	A	X	B	B	B	X	X	B	A	A	B	X	B	X	X	X	X	B	X	B	A	X	X	A	B	X	X	B	X	A	X	A	X	X	X	X	X	A	A	B	X	A	B	X	X	A	X	A	X
GM06:6596400	A	X	B	B	B	X	X	B	A	A	B	X	B	X	X	B	X	B	X	B	A	X	X	A	B	X	X	B	X	A	X	A	X	X	X	X	X	A	A	B	X	A	B	X	X	A	X	A	X
GM06:6677914	A	X	B	B	B	X	X	B	A	A	B	X	B	X	X	B	X	B	X	B	A	X	X	A	B	X	X	B	X	A	X	A	X	X	X	X	X	A	A	B	X	A	B	X	X	A	X	A	X
GM06:6995539	A	X	B	X	B	X	X	B	A	A	B	X	B	X	X	B	X	B	X	B	A	X	X	A	B	B	X	B	X	A	X	A	X	X	X	X	X	A	A	B	X	A	B	X	X	A	X	A	X
GM06:7163854	A	X	B	X	B	X	X	B	A	A	B	X	B	X	X	B	X	B	X	B	A	X	X	A	B	B	X	B	X	A	X	A	X	X	X	X	X	A	A	B	X	A	B	X	X	A	X	A	X
GM06:7487930	A	X	B	X	B	X	X	B	A	A	B	X	B	X	X	B	X	B	X	B	A	X	X	A	B	B	X	B	X	A	X	A	X	X	X	X	X	A	A	B	X	A	B	X	X	A	X	A	X
GM06:7701583	A	X	B	X	B	X	X	B	A	A	B	X	B	X	X	B	X	B	X	B	A	X	X	A	B	B	X	B	X	A	X	X	X	X	X	X	X	A	A	B	X	A	B	X	X	A	X	A	X
GM06:7703058	A	X	B	X	B	X	X	B	A	A	B	X	B	X	X	B	X	B	B	B	A	X	X	A	B	B	X	B	X	A	X	X	X	X	X	X	X	A	A	B	X	A	B	X	X	A	X	A	X
GM06:7843515	A	X	B	X	B	X	X	B	A	X	B	X	B	X	X	B	X	B	B	B	A	X	X	A	B	B	X	B	X	A	X	X	X	X	X	X	X	A	A	B	X	A	B	X	X	A	X	A	X
GM06:8043335	A	X	B	X	B	X	X	X	A	X	B	X	B	X	X	B	X	B	B	B	A	X	X	A	B	B	X	B	X	A	X	X	X	X	X	X	X	A	A	B	X	A	B	X	X	A	X	A	X
GM06:8044241	A	X	B	X	B	X	X	X	A	X	B	X	B	X	X	B	X	B	B	B	A	X	X	A	B	B	X	B	X	A	X	X	X	X	X	X	X	A	A	B	X	A	B	X	X	A	X	A	X
GM06:8061062	A	X	B	X	B	X	X	X	A	X	B	X	B	X	X	B	X	B	B	B	A	X	X	A	B	B	X	B	B	A	X	X	X	X	X	X	X	A	A	B	X	A	B	X	X	X	X	A	X
GM06:9023253	A	X	B	X	B	X	X	X	A	X	B	X	B	X	B	B	X	A	B	B	A	X	X	A	B	B	B	B	B	A	X	X	X	X	X	X	X	A	A	B	X	A	B	X	X	X	X	A	B
GM06:9049998	A	X	B	A	B	X	X	X	A	X	B	X	B	X	B	B	X	A	B	B	A	X	X	A	B	B	B	B	B	A	X	X	X	X	X	X	X	A	A	B	X	A	B	X	X	X	X	A	B
GM06:9247097	A	X	B	A	B	X	X	X	A	X	B	X	B	X	B	B	X	A	B	B	A	X	X	A	B	B	B	B	B	A	X	X	X	X	X	X	X	A	A	B	X	A	B	X	X	X	X	A	B
GM06:9411574	A	X	B	A	B	X	X	X	A	X	B	X	B	X	B	B	X	A	B	B	A	X	X	A	B	B	B	B	B	A	X	X	X	X	X	X	X	A	A	B	X	A	B	X	X	X	X	A	B
GM06:9412273	A	X	B	A	B	X	X	X	A	X	B	X	B	X	B	B	X	A	B	B	A	X	X	A	B	B	B	B	B	A	X	X	X	X	X	X	X	A	A	B	X	A	B	X	X	X	X	A	B
GM06:9438309	A	X	B	A	B	X	X	X	A	X	B	X	B	X	B	B	X	A	B	B	A	X	X	A	B	B	B	B	B	A	X	X	X	X	X	X	X	A	A	B	X	A	B	X	X	X	X	A	B
GM06:9808781	A	X	B	A	B	X	X	X	A	X	B	X	B	X	X	B	X	A	B	B	A	X	X	A	B	B	B	B	B	A	X	X	X	X	X	X	X	A	A	B	X	A	B	X	X	X	X	A	B
GM06:9900983	A	X	B	A	B	X	X	X	A	X	B	X	B	X	X	B	X	A	B	B	A	X	X	A	B	B	B	B	B	A	X	X	X	X	X	X	X	A	A	B	X	A	B	X	X	X	X	A	B
GM06:10151779	A	X	B	A	B	X	X	X	A	X	B	X	B	X	X	B	X	A	B	B	X	X	X	A	B	B	B	B	B	A	X	X	X	X	X	X	X	A	A	B	X	A	B	X	X	X	X	A	B
GM06:10327827	A	X	B	A	B	X	X	X	A	X	B	B	B	X	X	B	X	A	B	B	X	X	X	X	B	B	B	B	B	A	X	X	X	X	X	X	X	A	X	B	X	A	B	X	X	X	X	A	B
GM06:12847315	A	X	B	A	X	X	X	X	A	X	X	B	X	X	X	B	B	A	B	B	X	X	X	X	B	B	B	B	B	X	B	X	X	X	X	X	X	A	X	B	A	A	X	X	X	X	X	A	B
GM06:12983004	A	X	B	A	X	X	X	X	A	X	X	B	X	A	X	B	B	A	B	B	X	X	X	X	B	B	B	B	B	X	B	X	X	X	X	X	X	A	X	B	A	X	X	X	X	X	X	A	X
GM06:13029023	A	X	B	A	X	X	X	X	A	X	X	B	X	A	X	B	B	A	B	B	X	X	X	X	B	B	B	B	B	X	B	X	X	X	X	X	X	A	X	B	A	X	X	X	X	X	X	A	X
GM06:13148460	A	X	B	A	X	X	X	X	A	X	X	B	X	A	X	B	B	A	B	B	X	X	X	X	B	B	B	B	B	X	B	X	X	X	X	X	X	A	X	B	A	X	X	X	X	X	X	A	X
GM06:13303574	A	X	B	A	X	X	X	X	A	X	X	B	X	A	X	B	B	A	B	B	X	X	X	X	B	B	B	B	B	X	B	X	X	X	X	A	X	A	X	B	A	X	X	X	X	X	X	A	X
GM06:13365268	A	X	B	A	X	X	X	X	A	X	X	B	X	A	X	B	B	A	B	B	X	X	X	X	B	B	B	B	B	X	B	X	A	X	X	A	X	A	X	B	A	X	X	X	X	X	X	A	X
GM06:13419592	A	X	B	A	X	X	X	X	A	X	X	B	X	A	X	B	B	A	B	B	X	X	X	X	B	B	B	B	B	X	B	X	A	X	X	A	X	A	X	B	A	X	X	X	X	X	X	A	X
GM06:13616646	A	X	B	A	X	X	X	X	A	X	X	B	X	A	X	B	B	A	B	B	X	X	X	X	B	B	B	B	B	X	B	X	A	X	X	A	X	A	X	B	A	X	X	X	X	X	X	A	X
GM06:13708417	A	X	B	A	X	X	X	X	A	X	X	B	X	A	X	B	B	A	B	B	X	X	X	X	B	B	B	B	B	X	X	X	A	X	X	A	X	A	X	B	A	X	X	X	X	X	X	A	X
GM06:13708508	A	X	B	A	X	X	X	X	A	X	X	B	X	A	X	B	B	A	B	B	X	X	X	X	B	B	B	B	B	X	X	X	A	X	X	A	X	A	X	B	A	X	X	X	X	X	X	A	X
GM06:13970249	A	X	B	A	X	X	X	X	A	X	X	B	X	A	X	B	B	A	B	B	B	X	X	X	B	B	B	B	B	B	X	X	A	X	X	A	X	A	X	B	A	X	X	X	X	X	X	A	X
GM06:14532880	A	X	B	A	X	A	X	A	A	X	X	X	X	A	X	B	X	A	B	B	B	X	X	X	B	B	B	B	B	B	X	B	A	X	X	A	X	A	X	B	A	B	X	X	X	X	X	A	X
GM06:14533063	A	X	X	A	X	A	X	A	A	X	X	X	X	A	X	B	X	X	B	B	B	X	X	X	B	X	B	B	B	B	X	B	A	X	X	A	X	A	X	B	A	B	X	X	X	X	X	A	X
GM06:14645419	A	X	X	A	X	A	X	A	A	X	X	X	X	A	X	B	X	X	B	B	B	X	X	X	B	X	B	B	B	B	X	B	A	X	X	A	X	A	X	B	A	B	X	X	X	X	X	A	X
GM06:15830779	A	X	X	B	X	X	X	A	A	X	X	X	X	A	X	B	X	X	X	X	X	X	X	X	B	X	B	B	X	B	X	B	X	X	X	A	X	A	X	B	A	B	X	X	X	X	X	A	X
GM06:18141802	A	X	A	B	X	X	X	X	A	X	X	X	X	A	B	B	X	X	X	X	X	A	X	X	X	X	B	X	X	B	X	X	X	X	A	X	B	A	X	X	A	B	A	X	X	A	X	A	X
GM06:18156467	A	X	A	B	X	X	X	X	A	X	X	X	X	A	B	B	X	X	X	X	X	A	X	X	X	X	B	X	X	B	X	X	X	X	A	X	B	A	X	X	A	B	A	X	X	A	X	A	X
GM06:38175422	A	B	A	B	X	X	X	X	A	X	X	X	X	A	B	B	X	X	X	X	X	A	X	X	X	X	B	X	X	B	X	X	X	X	X	X	B	X	X	X	A	B	A	X	X	A	X	A	X
GM06:39892719	A	B	A	B	X	X	X	X	A	X	X	X	X	A	B	B	X	X	X	X	X	A	X	X	X	X	B	X	X	B	X	X	X	X	X	X	B	X	X	X	A	B	A	X	X	A	A	A	X
GM06:43437125	A	B	A	B	X	X	A	X	A	X	X	X	X	A	B	B	X	X	X	X	X	A	X	X	X	X	B	X	X	B	X	X	X	X	A	X	B	X	X	X	A	B	A	X	X	A	A	A	X
GM06:43725975	A	B	A	B	X	X	A	X	A	X	X	X	X	A	B	B	X	X	X	X	X	A	X	X	X	X	B	X	X	B	X	X	X	X	A	X	B	X	X	X	A	B	A	X	X	A	A	A	X
GM06:43754952	A	B	A	B	X	X	A	X	A	X	X	X	X	A	B	B	X	X	X	X	X	A	B	X	X	X	B	X	X	B	X	X	X	X	A	X	B	X	X	X	A	B	A	X	X	A	A	A	B
GM06:44499609	X	B	A	B	X	X	A	X	A	X	X	X	X	A	B	B	X	X	X	X	X	A	B	X	X	X	B	X	X	B	X	X	X	X	A	X	B	X	X	X	A	B	A	X	X	A	A	A	B
GM06:45233608	X	X	A	B	A	X	A	X	A	X	X	X	X	A	B	B	X	X	X	X	X	A	B	X	X	X	B	X	X	X	X	X	X	X	A	X	B	X	X	X	A	X	A	X	X	A	A	A	B
GM06:45235100	X	X	A	B	A	X	A	X	A	X	X	A	X	A	B	B	X	X	X	X	X	A	B	X	X	X	B	X	X	X	X	X	X	X	A	X	B	X	A	X	A	X	A	X	X	A	A	A	B
GM06:45290841	X	X	A	B	A	X	A	X	A	X	X	A	X	A	B	B	X	X	X	X	X	A	B	X	X	X	B	X	X	X	X	X	X	X	A	X	B	X	A	X	A	X	A	X	X	A	A	A	B
GM06:45303913	X	X	A	B	A	X	A	X	A	X	X	A	X	A	B	B	X	X	X	X	X	A	B	X	X	X	B	X	X	X	X	X	X	X	A	X	B	X	A	X	A	X	A	X	X	A	A	A	B
GM06:45426382	X	X	A	X	A	X	A	X	A	X	X	A	X	A	B	B	X	X	X	X	X	A	B	X	X	X	B	X	X	X	X	X	X	X	A	X	B	X	A	X	A	X	A	X	X	A	A	A	B
GM06:45503062	X	X	A	X	A	X	A	X	A	X	X	A	X	A	B	B	X	X	X	X	X	A	B	X	X	X	B	X	X	X	X	X	X	X	A	X	B	X	A	X	A	X	A	X	X	A	A	A	B
GM06:46473936	X	X	A	X	A	X	A	X	X	X	B	A	X	A	B	B	X	X	X	X	X	A	B	X	X	X	B	X	X	X	X	X	X	X	A	X	X	X	A	X	A	X	A	X	X	A	A	A	B
GM06:46523099	X	X	A	X	A	X	A	X	X	X	B	A	X	A	B	B	X	X	X	X	X	A	B	X	X	X	B	X	X	X	X	X	X	X	A	X	X	X	A	X	A	X	A	X	X	A	A	A	B
GM06:46817704	X	X	A	X	A	X	A	X	X	X	B	A	X	A	B	B	X	X	X	A	X	A	B	X	X	X	B	X	X	X	X	X	X	X	A	X	X	X	A	X	A	X	A	X	X	A	A	A	B
GM06:46817816	X	X	A	X	A	X	A	X	X	X	B	A	X	A	B	B	X	X	X	A	X	A	B	X	X	X	B	X	X	X	X	X	X	X	A	X	X	X	A	X	A	X	A	X	X	A	A	A	B
GM06:46921755	X	X	A	X	A	X	A	X	X	X	B	A	X	A	B	B	X	X	X	A	X	A	B	X	X	X	B	X	X	X	X	X	X	X	A	X	X	X	A	X	A	X	A	X	X	A	A	A	B
GM06:46957967	X	X	A	X	A	X	A	X	X	X	B	A	X	A	B	B	X	X	X	A	X	A	B	X	X	X	B	X	X	X	X	X	X	X	A	X	X	X	A	X	A	X	A	X	X	A	A	A	B
GM06:47592808	X	X	A	X	A	X	A	X	X	X	B	A	X	A	B	B	X	X	X	A	X	A	B	X	X	X	B	X	X	X	X	X	X	X	A	X	X	X	A	X	A	X	A	X	X	A	A	A	B
GM06:47592821	X	X	A	X	A	X	A	X	X	X	B	A	X	A	B	B	X	X	X	A	X	A	B	X	A	X	B	X	X	X	X	X	X	X	A	X	X	X	A	X	A	X	A	X	X	A	A	A	B
GM06:47593527	X	X	A	X	A	X	A	X	X	X	B	A	X	A	B	B	X	X	X	A	X	A	B	X	A	X	B	X	X	X	X	X	X	X	A	X	X	X	A	X	A	X	A	X	X	A	A	A	B
GM06:47959517	X	X	A	X	A	X	A	X	X	X	B	A	X	A	B	B	X	X	X	A	X	A	B	X	A	X	B	X	X	X	X	X	X	X	A	X	X	X	A	X	A	X	A	X	X	A	A	A	B
GM06:48096267	X	X	A	X	A	X	A	X	X	X	B	A	X	A	B	B	X	X	X	A	X	A	B	X	A	X	B	X	X	X	X	X	X	X	A	X	X	X	A	X	A	X	A	X	X	A	A	A	B
GM06:48394971	X	X	A	X	A	X	A	X	X	X	B	A	X	A	B	B	X	X	X	A	X	A	B	X	A	X	B	X	X	X	X	X	X	X	A	X	X	X	A	X	A	X	A	X	X	A	A	A	B
GM06:48466050	X	X	A	X	A	X	A	X	X	X	B	A	X	A	B	B	X	X	X	A	X	A	B	X	A	X	B	X	X	X	X	X	X	X	A	X	X	X	A	X	A	X	A	X	X	A	A	A	B
GM06:48564517	X	X	A	X	A	X	A	X	X	X	B	A	X	A	B	B	X	X	X	A	X	A	B	X	A	X	B	X	X	X	X	X	X	X	A	X	X	X	A	X	A	X	A	X	X	A	A	A	B
GM06:48880091	X	X	A	X	A	X	A	X	X	X	B	A	X	A	B	B	X	X	X	A	X	A	B	X	A	X	X	X	X	X	X	X	X	X	A	X	X	X	A	X	A	X	A	X	X	A	A	A	B
GM06:48887738	X	X	A	X	A	X	A	X	X	X	B	A	X	A	B	B	X	X	X	A	X	A	B	X	A	X	X	X	X	X	X	X	X	X	A	X	X	X	A	X	A	X	A	X	X	X	A	A	B
GM06:48887880	X	X	A	X	A	X	A	X	X	X	B	A	X	A	B	B	X	X	X	X	X	A	B	X	A	X	X	X	X	X	X	X	X	X	A	X	X	X	A	X	A	X	X	X	X	X	A	A	B
GM06:49184126	X	X	A	X	A	X	A	X	X	X	B	A	X	B	B	B	X	X	X	X	X	A	B	X	A	X	X	X	X	X	X	X	X	X	A	X	X	X	A	X	X	X	X	X	X	X	A	A	B
GM06:49425648	X	X	A	X	A	X	A	X	X	X	B	A	X	B	X	B	X	X	X	X	X	A	B	X	A	X	X	X	X	X	A	B	X	X	A	X	X	X	X	X	X	X	X	X	X	X	A	A	B
GM06:49696369	X	X	A	X	A	X	A	X	X	X	B	A	X	B	X	B	X	X	X	X	X	A	B	X	A	B	X	X	X	X	A	B	X	X	A	X	X	X	X	X	X	X	X	B	X	X	A	A	B
GM06:49753959	X	A	A	X	A	X	A	A	X	X	B	A	X	B	X	B	X	X	X	X	X	A	B	X	A	B	X	X	X	X	A	B	X	X	X	A	X	A	X	X	X	A	X	B	X	X	A	A	B
GM06:49886965	X	A	A	X	A	X	A	A	X	X	B	A	X	B	X	B	X	X	X	X	X	A	B	X	A	B	X	X	A	X	A	B	X	X	X	A	X	A	X	X	X	A	X	B	X	X	A	A	B
GM06:50166434	X	A	X	X	A	X	A	A	X	X	B	A	X	B	X	B	X	X	X	X	X	A	B	X	A	B	X	X	A	X	A	B	X	X	X	A	B	A	X	X	X	A	X	B	X	X	A	A	B
GM06:50290527	X	A	X	X	A	X	A	A	X	X	B	A	X	B	X	B	X	X	X	X	X	A	B	X	A	B	X	X	A	X	A	B	X	X	X	A	B	A	X	X	X	A	X	B	X	X	A	A	B
GM06:50718166	X	A	X	X	A	X	A	A	X	X	B	A	X	B	X	B	X	X	X	X	X	A	B	X	A	B	X	X	A	X	A	B	X	X	X	A	B	A	X	X	X	A	X	B	X	X	A	A	B
GM06:50817898	X	A	X	X	A	X	A	A	X	X	B	A	X	B	X	B	X	X	X	X	X	A	B	X	A	B	X	X	A	X	A	B	X	X	X	A	B	A	B	X	X	A	X	X	X	X	A	A	B
GM06:50843407	X	A	X	X	A	X	A	A	X	X	B	A	X	B	X	B	X	X	X	X	X	A	B	X	A	B	X	X	A	X	A	B	X	X	X	A	B	A	X	X	B	A	X	X	X	X	A	A	B
GM06:50873640	X	A	X	X	A	X	A	A	X	X	B	A	X	B	X	B	X	X	X	X	X	A	B	X	A	B	X	X	A	X	A	B	X	X	X	A	B	A	X	B	B	A	X	X	X	X	A	A	B
GM06:50878913	X	A	X	X	A	X	A	A	X	X	B	A	X	B	X	B	X	X	X	X	X	A	B	X	A	B	X	X	A	X	A	B	X	X	X	A	B	A	X	X	B	A	X	X	X	X	A	A	B
GM06:51031246	X	X	X	X	A	X	A	A	X	X	B	A	X	B	X	B	X	X	X	X	X	A	B	X	A	B	X	X	A	A	X	B	X	X	X	A	B	A	X	X	B	A	X	X	X	X	A	A	B
GM07:42708	B	A	A	A	X	B	B	B	A	X	X	A	B	X	X	B	X	A	X	A	X	X	X	B	B	X	X	X	X	B	X	B	X	X	X	X	X	A	A	X	A	B	X	A	X	B	B	X	A
GM07:55930	B	A	A	A	X	B	B	B	A	X	X	A	B	X	A	B	B	A	X	A	X	X	A	B	B	X	X	B	X	B	B	B	X	X	X	X	X	A	A	A	A	B	X	A	X	B	B	X	A
GM07:112199	B	A	A	A	X	B	B	B	A	X	X	A	B	X	X	B	X	A	X	A	X	X	X	B	B	X	X	X	X	B	X	B	X	X	X	X	X	A	A	X	A	B	X	A	X	B	B	X	A
GM07:142962	B	A	A	A	X	B	B	B	A	X	X	A	B	X	X	B	X	A	X	A	X	X	X	B	B	X	X	X	X	B	X	B	X	X	X	X	X	A	A	X	A	B	X	A	X	B	B	X	A
GM07:144328	B	A	A	A	X	B	B	B	A	X	X	A	B	X	X	B	B	A	X	A	X	X	X	B	B	X	X	B	X	B	X	B	X	X	X	X	X	A	A	X	A	B	X	A	X	B	B	X	A
GM07:145217	B	A	A	A	A	B	B	B	A	X	X	A	B	X	X	B	X	A	B	A	X	X	X	B	B	X	X	X	X	B	X	B	X	X	X	X	X	A	A	X	A	B	X	A	X	B	B	X	A
GM07:1250649	B	B	X	A	A	B	B	B	A	X	X	A	B	X	X	B	X	A	B	A	X	X	X	B	B	X	X	X	X	B	X	B	X	X	X	X	X	A	A	X	A	B	X	A	X	B	B	X	X
GM07:1357653	B	B	X	A	A	B	B	B	A	X	X	A	B	X	X	B	X	A	B	A	X	X	X	B	B	X	X	X	X	B	X	B	X	X	X	X	X	A	A	X	A	B	X	A	X	B	A	X	X
GM07:1674923	B	B	X	A	A	B	B	B	A	X	X	A	B	X	X	B	X	A	B	A	X	X	X	B	B	X	X	X	X	A	X	A	X	X	X	X	X	A	A	X	A	B	X	A	X	B	A	X	X
GM07:2006470	B	B	X	A	A	B	B	X	A	X	X	A	B	X	X	B	X	A	B	A	X	X	X	B	B	X	A	X	X	A	X	A	X	X	X	X	X	A	A	X	A	B	X	A	X	B	A	X	X
GM07:2500473	B	B	X	A	A	B	B	X	A	X	X	A	X	X	X	B	X	A	B	A	X	X	X	B	B	X	A	X	X	A	X	A	X	A	X	X	X	A	A	X	A	B	X	A	X	B	A	X	X
GM07:2547437	B	B	X	A	A	B	B	X	A	X	X	A	X	X	X	B	X	A	B	A	X	X	X	B	B	X	A	X	X	A	X	A	A	A	X	X	X	A	A	X	A	B	A	A	X	B	A	X	X
GM07:2549303	B	B	X	A	A	B	B	X	A	X	X	A	X	X	X	B	X	A	B	A	X	X	X	B	B	X	A	X	X	A	X	A	A	A	X	X	X	A	A	X	A	B	A	A	X	B	A	X	X
GM07:2592033	B	B	X	A	A	B	B	X	A	X	X	B	X	X	X	B	X	A	B	X	X	X	X	B	B	X	A	X	X	A	X	A	A	A	X	X	X	B	A	X	A	B	A	A	X	B	A	X	X
GM07:2984019	B	B	X	A	A	B	B	X	A	X	X	B	X	X	X	B	X	A	B	X	X	X	X	B	B	X	A	X	X	A	X	A	A	A	X	X	X	B	A	B	A	B	A	A	X	B	A	X	X
GM07:3036123	B	B	X	A	A	B	B	X	A	X	X	B	X	X	X	B	X	A	B	X	X	X	X	B	B	X	A	X	X	A	X	A	A	A	X	X	X	B	A	B	A	B	A	A	X	B	A	X	X
GM07:3048131	B	B	X	A	A	B	B	X	A	X	X	B	X	X	X	B	X	A	B	X	X	X	X	B	B	X	A	X	X	A	X	A	A	A	X	X	X	B	A	B	A	B	A	A	X	B	A	X	X
GM07:5079956	X	B	B	A	A	B	B	X	A	X	X	B	X	X	B	B	X	A	B	X	X	X	A	X	B	X	A	X	X	A	X	A	A	X	X	X	X	B	A	B	X	X	X	A	B	B	A	X	X
GM07:5085175	X	B	B	A	A	B	B	X	A	X	X	B	X	X	B	B	X	A	B	X	X	X	A	X	B	A	A	X	X	A	X	A	A	X	X	X	X	B	A	B	X	X	X	B	B	B	A	X	X
GM07:5210029	X	B	B	A	A	B	B	X	A	X	X	B	X	X	B	B	X	A	B	X	X	X	A	X	B	A	A	X	X	A	X	A	A	X	A	X	X	B	A	B	X	X	X	B	B	B	A	X	X
GM07:5256305	X	B	B	A	A	B	B	X	A	X	X	B	X	X	B	B	X	X	B	X	X	X	A	X	B	A	A	X	X	A	X	A	A	X	A	X	X	B	A	B	X	X	X	B	B	B	A	X	X
GM07:5404867	X	B	B	A	A	B	B	X	A	X	X	B	X	X	B	B	X	X	B	X	X	X	A	X	B	A	A	X	X	A	X	A	A	X	A	X	X	B	A	B	X	X	X	B	B	B	A	X	X
GM07:5405026	X	B	B	A	A	B	B	X	A	X	X	B	X	X	B	B	X	X	B	X	X	X	A	X	B	A	A	X	X	A	X	A	A	X	A	X	X	B	A	B	X	X	X	B	B	B	A	X	X
GM07:5415701	X	B	B	A	A	B	B	X	A	X	X	B	X	X	B	B	X	X	B	X	X	X	A	X	B	A	A	X	X	A	X	A	A	X	A	X	X	B	A	B	X	X	X	B	B	B	A	X	X
GM07:5419620	X	B	B	A	A	B	B	X	A	X	X	B	X	X	B	B	X	X	B	X	X	X	A	X	B	A	A	X	X	A	X	A	A	X	A	X	X	B	A	B	X	X	X	B	B	B	A	X	X
GM07:5523443	X	B	B	A	A	B	B	X	A	X	X	B	X	X	B	B	X	X	B	X	X	X	A	X	B	A	A	X	X	A	X	A	A	X	A	X	X	B	A	B	X	X	X	B	B	B	A	X	X
GM07:5802158	X	B	B	A	A	B	B	X	A	X	X	B	X	X	B	B	X	X	B	X	X	X	A	X	B	A	A	X	X	A	X	A	A	X	A	X	X	B	A	B	X	X	X	B	B	B	A	X	X
GM07:6013359	X	B	B	A	A	B	B	X	A	X	X	B	X	X	B	B	X	X	X	X	X	X	A	X	B	A	A	X	X	A	X	A	A	X	A	X	X	B	A	B	X	X	X	B	B	B	A	X	X
GM07:6184836	X	B	B	A	A	B	B	X	A	X	X	B	X	X	B	B	X	X	X	X	X	X	A	X	B	A	A	X	X	A	X	A	A	X	A	X	X	B	A	B	X	X	X	B	B	B	A	X	X
GM07:6889969	X	B	B	A	A	B	B	A	A	X	X	B	X	X	B	B	X	X	X	X	X	X	A	X	B	A	A	X	X	A	X	A	A	X	A	X	X	B	A	B	X	X	X	B	B	B	A	X	X
GM07:6890075	X	B	B	A	A	B	B	A	A	X	X	B	X	X	B	B	X	X	X	X	X	X	A	X	B	A	A	X	X	A	X	A	A	X	A	X	X	B	A	B	X	X	X	B	B	B	A	X	X
GM07:7081876	X	B	B	A	A	B	B	A	A	X	X	B	X	X	B	B	X	X	X	X	X	X	A	X	B	A	A	X	X	A	X	A	A	X	A	X	X	B	A	B	X	X	X	B	B	B	A	X	X
GM07:7096343	X	B	B	A	A	B	B	A	A	X	X	B	X	X	B	B	X	X	X	X	X	X	A	X	B	A	A	X	X	A	X	A	A	X	A	X	X	B	A	B	X	X	X	B	B	B	A	X	X
GM07:7668053	X	B	B	A	A	B	B	A	A	X	B	B	X	X	B	B	X	X	X	X	X	X	A	X	B	A	A	X	B	A	X	A	A	X	A	X	X	B	A	B	B	X	X	B	B	B	A	X	X
GM07:7788607	X	B	B	A	A	B	B	A	A	X	B	B	X	X	B	B	X	X	X	X	X	X	A	X	B	A	A	X	B	A	X	A	A	X	A	X	X	B	A	B	B	X	X	B	B	B	A	X	X
GM07:7893933	X	B	B	A	A	B	B	A	A	X	B	B	X	X	B	B	X	X	X	X	X	X	A	X	B	A	A	X	B	A	X	A	A	X	A	X	X	B	A	B	B	X	X	B	B	B	A	X	X
GM07:7894122	X	B	B	A	A	B	B	A	A	X	B	B	X	X	B	B	X	X	X	X	X	X	A	X	B	A	A	X	B	A	X	A	A	X	A	X	X	B	A	B	B	X	X	B	B	B	A	X	X
GM07:8098512	X	B	B	A	A	B	B	A	A	X	B	B	X	X	B	B	X	X	X	X	X	X	A	X	B	A	A	X	B	A	X	A	A	X	A	X	X	B	A	B	B	X	X	B	B	B	A	X	X
GM07:8103486	X	B	B	A	A	B	B	A	A	X	B	B	X	X	B	B	X	X	X	X	X	X	A	X	B	A	A	X	B	A	X	A	A	X	A	X	X	B	A	B	B	X	X	B	B	B	A	X	X
GM07:8239255	X	B	B	A	A	B	B	A	A	X	B	B	X	X	B	B	X	X	X	X	X	X	A	X	B	A	A	X	B	A	X	A	A	X	A	X	X	B	X	B	B	X	X	B	B	B	A	X	X
GM07:8485393	X	B	B	A	A	B	B	A	A	X	B	B	X	X	B	B	X	X	X	X	X	X	A	X	B	A	A	X	B	A	X	A	A	X	A	X	X	B	X	X	B	X	X	B	B	B	A	X	X
GM07:8633744	X	B	B	A	A	B	X	A	A	X	B	B	X	X	B	B	X	X	X	X	X	X	A	X	B	A	A	X	B	A	X	A	A	X	A	X	X	B	X	X	B	X	X	B	B	B	A	X	X
GM07:9518828	X	B	B	A	A	B	X	A	A	X	B	B	B	X	B	X	X	X	X	X	X	X	A	X	B	A	A	X	B	A	X	A	A	X	A	X	X	B	X	X	B	X	X	B	B	B	A	X	X
GM07:9551868	X	B	B	A	A	B	X	A	A	X	B	B	B	X	B	X	X	X	X	X	X	X	A	X	B	A	A	X	B	A	X	A	A	X	A	X	X	B	X	X	B	X	X	B	B	B	A	X	X
GM07:9552345	X	B	B	A	A	B	X	A	A	X	B	B	B	X	B	X	X	X	X	X	X	X	A	X	B	A	A	X	B	A	X	A	A	X	A	X	X	B	X	X	B	X	X	B	B	B	A	X	X
GM07:9552478	X	B	B	A	A	B	X	A	A	X	B	B	B	X	B	X	X	X	X	X	X	X	A	X	B	A	A	X	B	A	X	A	A	A	A	X	X	B	X	X	B	X	X	B	B	B	A	X	X
GM07:9579665	X	B	B	A	A	B	X	A	A	X	B	B	B	X	B	X	X	X	X	X	X	X	A	X	B	A	A	X	B	A	X	A	A	A	A	X	X	B	X	X	B	X	X	B	B	B	A	X	X
GM07:9876648	X	B	B	A	A	B	X	A	A	X	B	B	B	X	B	X	X	X	X	X	X	X	A	X	B	A	A	X	B	A	X	A	A	A	A	X	X	B	X	X	B	X	X	B	B	B	A	X	X
GM07:9914359	X	B	B	A	A	B	X	A	A	X	B	B	B	X	B	X	X	X	X	X	X	X	A	X	B	A	A	X	B	A	X	A	A	A	A	X	X	B	X	X	B	X	X	B	B	B	A	X	X
GM07:10112176	X	B	B	A	A	B	X	A	A	X	B	B	B	X	B	X	X	X	X	X	X	X	A	A	B	A	A	X	B	A	X	A	A	A	A	X	X	B	X	X	B	B	X	B	B	B	A	X	X
GM07:16122334	X	B	X	A	X	B	X	A	A	X	B	B	B	X	X	B	X	X	B	X	X	X	A	A	X	A	A	X	B	B	X	A	B	A	A	X	X	B	X	X	B	B	X	B	B	B	X	X	X
GM07:16123273	X	B	X	A	X	B	X	A	A	A	B	B	B	X	X	B	X	X	B	X	X	X	A	A	X	A	A	X	X	B	X	A	B	A	A	A	X	B	X	X	B	B	X	B	B	B	X	A	X
GM07:16133875	X	B	X	A	X	B	X	A	A	A	B	B	B	X	X	B	X	X	B	X	X	X	A	A	X	A	A	X	X	B	X	A	B	A	A	A	X	B	X	X	B	B	X	B	B	B	X	A	X
GM07:16178564	X	B	X	A	X	B	X	A	A	A	A	B	B	X	X	B	X	X	B	X	X	X	A	A	X	A	A	X	X	B	X	B	B	A	A	A	X	B	X	X	B	B	X	B	B	B	X	A	X
GM07:16235502	X	B	X	A	X	B	X	A	A	A	A	B	B	X	X	B	X	X	B	X	X	X	A	A	X	A	A	X	X	B	X	B	B	A	A	A	X	B	X	X	B	B	X	A	B	B	X	A	X
GM07:16235576	X	B	X	A	X	B	X	A	A	A	A	B	B	X	X	B	X	X	B	X	X	X	A	A	X	A	A	X	X	B	X	B	B	A	A	A	X	B	X	X	B	B	X	A	B	B	X	A	X
GM07:16245039	X	B	X	A	X	B	X	A	X	A	A	B	B	X	X	B	X	X	B	X	X	X	A	A	X	A	A	X	X	B	X	B	B	A	A	A	X	B	X	X	B	B	X	A	B	B	X	A	X
GM07:16248203	X	B	X	A	X	B	X	A	X	A	A	B	B	X	X	B	X	X	B	X	X	X	A	A	X	A	X	X	X	B	X	B	B	A	A	A	X	B	X	X	B	B	X	A	B	B	X	A	X
GM07:17995966	X	B	X	A	X	B	X	A	X	A	A	X	X	X	X	B	X	X	B	X	X	X	A	A	X	A	X	X	X	B	X	B	B	A	X	A	X	B	X	X	B	B	X	A	B	B	X	A	X
GM07:18269745	X	B	X	A	X	B	A	A	X	A	A	X	X	X	X	B	X	X	B	X	X	X	A	A	X	X	X	X	X	B	X	B	B	A	X	X	X	B	X	X	B	B	X	A	B	B	X	A	X
GM07:19374945	X	B	X	A	X	B	A	A	X	A	A	X	X	X	X	B	A	X	B	X	X	B	A	A	X	X	X	X	X	B	X	B	B	A	X	X	X	B	X	X	B	B	X	A	B	X	X	A	B
GM07:19426531	X	B	X	A	X	B	A	A	X	A	A	X	X	X	X	B	A	X	B	X	X	B	A	A	X	X	X	X	X	B	X	B	B	A	X	X	X	B	X	X	B	B	X	A	B	X	X	A	B
GM07:19430895	X	B	X	A	X	B	A	A	X	A	A	X	X	X	X	B	A	X	B	X	X	B	A	A	X	X	X	X	X	B	X	B	B	A	X	X	X	B	X	X	B	B	X	A	B	X	X	A	B
GM07:19436397	X	B	X	A	X	B	A	A	X	A	A	X	X	X	X	B	A	X	B	X	X	B	A	A	X	X	X	X	X	B	X	B	B	A	X	X	X	B	X	X	B	B	X	A	B	X	X	A	B
GM07:19489890	X	B	X	A	X	B	A	A	X	A	A	X	X	X	X	B	A	X	B	X	X	B	A	A	X	X	X	X	X	B	X	B	B	A	X	X	X	B	X	X	B	B	X	A	B	X	X	A	B
GM07:25647088	X	B	X	A	X	B	A	A	X	A	A	X	X	X	X	B	A	X	B	X	X	B	A	A	X	X	X	X	X	B	X	B	B	A	X	X	X	B	X	X	B	B	X	A	B	X	X	A	B
GM07:28163576	X	B	X	A	X	B	A	A	X	A	A	X	X	X	X	B	A	X	B	X	X	B	A	A	X	X	X	X	X	B	X	B	B	A	X	X	X	B	X	X	B	B	X	A	B	X	X	A	B
GM07:28332415	X	B	X	A	X	B	A	A	X	A	A	X	X	X	X	B	A	X	B	X	X	B	A	A	X	X	X	X	X	B	X	B	B	A	X	X	X	B	X	X	B	B	X	A	B	X	X	A	B
GM07:35194895	X	B	X	A	X	B	A	A	X	A	A	X	X	X	X	B	A	X	B	X	X	B	A	A	X	X	X	X	X	B	X	B	B	A	X	X	X	B	X	X	B	B	X	A	B	X	X	A	X
GM07:35334874	X	B	X	A	X	B	A	A	X	A	A	X	X	X	X	B	A	X	B	X	X	B	A	A	X	X	X	X	X	B	X	B	B	A	X	X	X	B	X	X	B	B	X	A	B	X	X	A	X
GM07:35693828	X	B	X	A	X	B	A	A	X	A	A	X	X	X	X	B	A	X	B	X	X	B	A	A	X	X	X	B	X	B	X	B	B	A	X	X	X	B	X	X	B	B	X	A	B	X	X	X	X
GM07:35712247	X	B	X	A	X	B	A	A	X	A	A	X	X	X	X	B	A	X	B	X	X	B	A	A	X	X	X	B	X	B	X	B	B	A	X	X	X	B	X	X	B	B	X	A	B	X	X	X	X
GM07:35741973	X	B	X	A	A	B	A	A	X	A	A	X	X	X	X	B	A	X	B	X	X	B	A	A	X	X	X	B	X	B	X	B	B	A	X	X	X	B	X	X	B	B	X	A	B	X	X	X	X
GM07:36110741	X	B	X	A	A	B	A	A	X	A	A	X	X	X	X	B	A	X	B	X	X	B	A	X	X	B	X	B	X	B	X	B	B	X	X	X	X	B	X	X	B	B	X	A	B	X	X	X	X
GM07:36110811	X	B	X	A	A	B	A	A	X	A	A	X	X	X	X	B	A	X	B	X	X	X	A	X	X	B	X	B	X	B	X	B	B	X	X	X	X	B	X	X	B	B	X	A	B	X	X	X	X
GM07:36478762	X	B	X	A	A	B	A	A	X	X	A	X	X	X	X	B	A	X	B	X	X	X	A	X	X	B	X	B	X	B	X	B	B	X	X	X	X	B	X	X	B	B	X	A	B	A	X	X	X
GM07:36513464	X	B	X	A	A	B	A	A	X	X	A	X	X	X	X	B	A	X	B	X	X	X	A	X	X	B	X	B	X	B	X	B	B	X	X	X	X	B	X	X	B	B	X	B	B	A	X	X	X
GM07:37123799	X	B	X	A	A	X	A	A	X	X	A	X	X	X	X	B	A	X	B	X	X	X	A	X	X	B	X	B	X	B	X	B	B	X	X	A	X	B	X	X	B	B	X	B	B	A	X	X	X
GM07:37151383	X	B	X	A	A	X	A	A	X	X	A	X	X	X	X	B	A	X	B	X	X	X	A	X	X	B	X	B	X	B	X	B	B	X	X	A	X	B	X	X	B	B	X	B	B	A	X	X	X
GM07:37152553	X	B	X	A	A	X	A	A	X	X	B	X	B	X	X	B	A	X	B	X	X	X	A	X	X	B	X	B	X	B	X	B	B	X	X	A	X	B	X	X	B	B	X	B	B	A	X	X	X
GM07:42581536	X	B	X	B	X	X	X	A	X	X	B	X	B	X	X	A	X	X	B	X	X	X	A	X	X	X	X	B	X	B	X	B	B	X	X	A	X	B	X	X	X	B	X	B	A	X	X	X	X
GM07:42756900	X	X	X	B	X	X	X	A	A	X	B	A	X	X	B	A	B	A	B	X	B	X	A	X	A	X	X	B	X	B	B	B	X	A	X	X	A	B	B	B	X	B	B	B	A	X	X	X	X
GM07:42768922	X	X	X	B	X	X	X	A	A	X	B	A	X	X	B	A	X	A	B	X	B	X	A	X	A	B	X	B	A	B	B	B	X	A	X	X	A	B	B	B	X	B	B	B	A	X	X	X	X
GM07:42902734	X	X	X	B	X	X	X	A	A	X	B	A	X	X	B	A	X	A	B	X	B	X	A	X	A	X	X	B	X	B	B	B	X	A	X	X	A	B	B	B	X	B	B	B	A	X	X	X	X
GM07:42910927	X	X	X	B	X	X	X	A	A	X	B	A	X	X	B	A	X	A	B	X	B	X	A	X	A	X	X	B	X	B	B	B	X	A	X	X	A	B	B	B	X	B	B	B	A	X	X	X	X
GM07:42926803	X	X	X	B	X	X	X	A	A	X	B	A	X	X	B	A	X	A	B	X	B	B	A	X	A	X	X	B	X	B	B	B	X	A	X	X	A	B	B	B	X	B	B	B	A	X	A	X	X
GM08:132840	B	A	X	B	B	B	B	B	B	X	A	A	B	A	A	B	B	A	B	A	B	A	A	A	X	A	X	A	B	X	B	B	X	A	A	A	A	B	A	B	A	B	B	B	X	X	B	B	B
GM08:1130502	B	A	X	X	B	B	B	B	X	X	X	A	X	X	A	X	B	A	B	A	X	A	A	A	X	X	X	B	X	X	B	B	X	A	A	A	A	X	B	B	A	B	B	X	X	X	X	B	B
GM08:1174010	B	A	X	X	B	B	B	B	X	X	X	A	X	X	A	X	B	A	B	A	X	A	A	A	X	X	X	B	X	X	B	B	X	A	A	A	A	B	B	B	A	X	B	B	B	X	X	B	A
GM08:1174211	B	A	X	X	B	B	B	B	X	X	X	A	X	X	A	X	B	A	B	A	X	A	A	A	X	X	X	B	X	X	B	B	X	A	A	A	A	X	B	B	A	X	B	X	X	X	X	B	X
GM08:2935796	B	X	X	X	X	B	X	X	X	B	X	X	B	X	X	X	B	A	B	X	B	A	A	A	B	B	X	B	B	X	B	X	B	X	X	A	A	A	B	B	A	X	B	A	B	X	X	B	X
GM08:3041406	B	X	X	X	B	B	X	X	X	X	X	B	A	X	X	X	B	A	B	X	B	A	A	X	B	B	X	B	B	X	B	A	B	X	X	A	A	X	B	B	A	X	B	A	B	X	X	B	X
GM08:3142144	B	X	X	X	B	B	X	X	X	X	X	B	A	X	X	A	B	A	B	X	B	A	A	X	B	B	X	B	B	X	B	A	B	X	X	A	A	X	B	B	A	X	B	A	B	X	X	B	A
GM08:3184446	B	X	X	X	B	B	X	X	X	X	X	B	A	X	X	A	B	X	B	X	B	A	A	X	B	B	X	B	B	X	B	A	B	X	X	A	A	X	B	B	A	A	B	A	B	X	X	B	A
GM08:4787282	B	X	X	X	B	B	X	X	X	X	X	B	A	X	X	A	X	X	X	X	X	A	X	X	B	B	X	B	B	X	B	A	B	X	X	X	A	X	B	B	A	A	B	A	X	X	X	B	A
GM08:4936146	B	X	X	X	B	B	X	X	X	X	X	B	A	X	X	A	X	X	X	X	X	A	X	X	B	B	X	B	B	X	B	A	B	X	X	X	A	X	B	B	A	A	B	A	X	X	X	X	A
GM08:5005929	B	X	X	X	B	B	X	X	X	X	X	B	A	X	X	A	X	X	X	X	X	A	X	X	B	B	X	B	B	X	B	A	B	X	X	X	A	X	B	B	A	A	B	A	X	X	X	X	A
GM08:5121642	B	X	X	X	B	B	X	X	X	X	X	B	A	X	X	A	X	X	X	X	X	A	X	X	B	B	X	B	B	X	B	A	B	X	X	X	A	X	B	B	A	A	B	A	X	X	X	X	A
GM08:5242876	B	X	X	X	B	B	X	X	X	X	X	B	A	X	X	A	X	X	X	X	X	A	X	X	B	B	X	B	B	X	B	A	B	X	X	X	A	X	B	B	A	A	B	A	X	X	X	X	A
GM08:5307602	B	X	X	X	B	B	X	X	X	X	X	B	A	X	X	X	X	X	X	X	X	A	X	X	B	B	X	B	B	X	B	A	B	X	X	X	A	X	B	B	A	A	X	A	X	X	X	X	A
GM08:6063363	B	X	X	X	X	B	X	X	X	X	X	B	A	X	X	X	X	X	X	X	X	A	X	X	B	B	X	B	B	X	B	A	B	X	X	X	A	X	B	B	A	A	X	A	A	X	X	X	A
GM08:6064440	B	X	X	X	X	B	X	X	X	X	X	B	A	X	X	X	X	X	X	X	X	X	X	X	B	B	X	B	B	X	B	A	B	X	X	X	A	X	B	B	A	A	X	A	A	X	X	X	A
GM08:6087435	B	X	X	X	X	B	X	X	X	X	X	B	A	X	X	X	X	A	X	X	X	X	X	X	B	B	X	B	B	X	B	A	B	X	X	X	A	X	B	B	A	A	X	A	A	X	X	X	A
GM08:6277042	B	X	X	X	X	B	X	X	X	X	X	B	A	X	X	X	X	A	X	X	X	X	X	X	B	B	X	B	B	X	B	A	B	X	X	X	A	X	B	B	A	A	X	A	A	X	X	X	A
GM08:6364708	B	X	X	X	X	B	X	X	X	X	X	B	A	X	X	X	X	A	X	X	X	X	X	X	B	B	X	B	B	A	B	A	B	X	X	X	A	X	B	B	A	A	X	A	A	X	X	X	B
GM08:6398614	B	X	X	X	X	B	X	X	X	X	X	B	X	X	X	X	X	A	X	X	X	X	X	X	B	B	X	B	B	A	B	A	B	X	X	X	A	X	B	B	A	A	X	A	A	X	X	X	B
GM08:6587476	B	X	X	X	X	B	X	X	X	X	X	B	X	X	X	X	X	A	X	X	X	X	X	X	B	B	X	B	B	A	B	A	B	X	X	X	A	X	B	X	A	A	X	A	A	X	X	X	B
GM08:7756564	X	X	X	X	X	B	X	X	X	X	A	B	X	X	X	X	X	A	X	X	X	B	X	X	B	B	X	B	B	A	X	A	X	X	X	X	X	X	B	X	A	A	X	A	A	X	X	B	B
GM08:7780496	X	X	X	A	X	B	X	X	X	X	A	B	X	X	X	X	X	A	X	X	X	B	X	X	B	B	X	B	B	A	X	A	X	X	X	X	X	X	B	X	A	A	X	A	A	X	X	B	B
GM08:7781003	X	X	X	A	X	B	X	X	X	X	A	B	X	X	X	X	X	A	X	X	X	B	X	X	B	B	X	B	B	A	X	A	X	X	X	X	X	X	B	X	A	A	X	A	A	X	X	B	B
GM08:7920736	X	X	X	A	X	B	X	X	X	X	A	B	X	X	X	X	X	A	X	X	X	B	X	X	B	B	A	B	B	A	X	A	X	X	X	X	X	X	B	X	A	A	X	A	A	X	X	B	B
GM08:8002535	X	X	X	A	X	B	X	X	X	X	A	B	X	X	X	X	X	A	X	X	X	B	X	X	B	B	A	B	B	A	X	A	X	X	X	X	X	X	B	X	A	A	X	A	A	X	X	B	B
GM08:8556756	X	X	X	A	X	B	X	X	X	X	A	B	X	X	X	X	A	A	X	X	X	B	X	X	B	B	X	B	B	A	X	A	X	X	X	X	X	X	B	X	A	A	X	A	A	X	X	B	B
GM08:8573338	X	X	X	A	X	B	X	X	X	X	A	B	X	X	X	X	A	A	X	X	X	B	X	X	B	B	X	B	B	A	X	A	X	X	X	X	X	X	B	X	A	A	X	A	A	X	X	B	B
GM08:8806724	X	X	X	A	X	B	X	X	X	X	X	B	X	X	X	X	A	A	X	X	X	B	X	X	B	B	X	B	X	A	X	X	X	X	X	X	X	X	B	X	A	A	X	A	A	X	X	B	B
GM08:9107986	X	X	X	A	X	B	X	X	X	X	X	B	X	X	X	X	A	A	X	X	X	B	X	X	B	B	X	B	X	A	X	X	X	X	X	X	X	X	B	X	A	A	X	A	A	X	X	B	B
GM08:9138910	X	X	X	A	X	A	X	X	X	X	X	B	X	X	X	X	A	X	X	X	X	B	X	X	A	B	X	B	X	A	X	X	X	X	X	X	X	X	B	X	A	A	X	A	A	X	X	B	B
GM08:9754317	X	X	X	A	X	A	X	X	A	X	X	B	X	X	X	X	A	X	X	X	X	B	X	X	A	B	X	B	X	A	X	X	X	X	X	X	X	X	B	A	A	A	X	A	A	X	X	B	B
GM08:9821335	X	X	X	A	X	A	X	X	A	X	X	B	X	X	X	X	A	X	X	X	X	B	X	X	A	B	X	B	X	A	X	X	X	X	X	X	X	X	B	A	A	A	A	A	A	X	X	B	B
GM08:9939190	X	X	X	A	X	A	X	X	A	X	X	B	X	X	X	X	A	X	X	X	X	B	X	X	A	B	X	B	X	A	X	X	X	X	X	X	X	X	B	A	A	A	A	X	A	X	X	B	B
GM08:10258675	X	X	X	A	X	A	X	X	A	X	X	B	X	X	X	X	A	X	X	X	X	B	X	B	A	B	X	B	X	A	X	X	X	X	A	X	B	X	B	A	A	A	A	X	A	X	X	B	B
GM08:10281301	X	X	X	A	X	A	X	X	A	X	X	B	X	A	X	X	A	X	X	X	X	B	X	B	A	B	X	B	X	A	X	X	X	X	A	X	B	X	B	A	A	A	A	X	A	X	X	B	B
GM08:10362205	X	X	X	A	X	A	X	X	A	X	X	B	X	A	X	X	A	X	X	X	X	B	X	B	A	B	X	B	X	A	X	X	X	X	A	X	B	X	B	A	A	A	A	X	A	X	X	B	B
GM08:10480653	X	X	X	A	X	A	X	X	A	X	X	B	X	A	X	X	A	X	A	X	X	B	X	B	A	B	X	B	X	A	X	X	X	X	A	X	B	X	B	A	A	A	A	X	A	X	X	B	B
GM08:10757609	X	X	X	A	X	A	A	X	A	X	X	B	X	A	X	X	A	X	A	X	X	B	X	B	A	B	X	X	X	A	X	X	X	X	A	X	B	X	B	A	A	A	A	X	A	X	X	B	B
GM08:10950188	X	X	X	A	X	A	A	X	A	X	X	B	X	A	X	X	A	X	A	X	X	B	X	B	A	B	X	X	X	A	X	X	B	X	A	X	B	X	B	A	A	X	A	X	A	X	X	B	B
GM08:11203204	X	X	X	A	X	A	A	X	A	B	X	B	X	A	X	X	A	X	A	X	X	B	X	B	A	B	X	X	X	A	X	X	B	X	A	X	B	X	B	A	A	X	A	B	A	X	X	X	B
GM08:11477277	X	X	X	A	X	A	A	X	A	B	X	B	X	A	X	X	A	X	A	X	X	B	X	B	A	B	X	X	X	A	X	X	B	X	A	X	B	X	B	A	A	X	A	B	A	X	X	X	B
GM08:11719110	X	X	X	A	X	A	A	X	A	B	X	B	X	A	X	X	A	X	A	X	X	B	X	B	A	B	X	X	X	A	X	X	B	X	A	X	B	X	B	A	A	X	A	B	A	X	X	X	B
GM08:11720208	X	X	X	X	X	A	A	X	A	B	X	B	X	A	X	X	A	X	A	X	X	B	X	B	A	B	X	X	X	A	X	X	B	X	A	X	B	X	B	A	A	X	A	B	A	X	X	X	B
GM08:11722906	X	X	X	X	X	A	A	X	A	B	X	B	X	A	X	X	A	X	A	X	X	B	X	B	A	B	X	X	X	A	X	X	B	X	A	X	B	X	B	A	A	X	A	B	A	X	X	X	B
GM08:12469521	X	X	X	X	X	A	A	X	A	B	X	B	X	A	X	X	A	X	A	X	X	B	X	B	A	B	X	X	X	A	X	X	B	X	A	X	B	X	B	A	A	X	A	B	A	X	X	X	B
GM08:12895273	X	X	X	X	X	X	A	X	A	B	X	B	X	A	X	X	A	X	A	X	X	A	X	B	A	B	X	X	X	A	X	X	B	A	A	X	B	X	B	A	X	X	X	B	A	X	X	X	B
GM08:46085086	X	B	B	X	B	X	A	X	B	X	X	B	B	X	X	X	X	X	B	B	A	A	B	X	B	A	X	X	X	B	X	X	A	A	B	X	X	A	X	A	X	X	X	A	B	B	B	B	X
GM08:46098036	X	B	B	X	B	X	A	A	B	X	X	B	B	X	X	X	X	X	B	B	A	A	B	X	B	A	X	X	X	B	X	X	A	A	B	X	X	A	X	A	X	X	X	A	B	B	B	B	X
GM08:46098139	X	B	B	X	B	X	A	A	B	X	X	B	B	X	X	X	X	X	B	B	A	A	B	X	B	A	X	X	X	B	X	A	A	A	B	X	X	A	X	A	X	X	X	A	B	B	B	B	X
GM08:46145035	X	B	B	X	B	X	A	A	B	X	X	A	B	X	X	X	X	X	B	B	A	A	B	X	B	A	X	X	X	B	X	A	A	A	B	X	X	A	X	A	X	X	X	A	B	B	B	B	X
GM08:46156971	X	B	B	X	B	X	B	A	B	X	X	A	B	X	X	X	X	X	B	B	A	A	B	X	B	A	X	X	X	B	X	A	A	A	B	X	X	A	X	B	X	X	X	A	B	B	B	B	X
GM08:46484976	X	B	B	X	B	X	B	A	B	X	X	A	X	X	X	X	X	X	B	B	A	X	B	X	B	A	X	X	X	B	X	A	A	A	B	X	X	A	X	B	X	X	X	A	B	B	B	B	X
GM08:46755974	X	B	B	X	B	X	B	A	X	X	X	A	X	X	X	X	X	X	B	B	A	X	B	X	B	A	X	X	X	B	X	A	A	A	B	X	X	A	X	B	X	X	X	A	B	B	B	B	X
GM08:47258336	X	B	B	X	B	X	B	X	X	B	X	A	X	X	A	A	B	B	B	B	A	X	B	X	B	A	X	X	X	B	X	A	A	A	B	A	X	A	X	B	X	X	X	A	B	B	B	B	X
GM08:47289756	X	X	B	X	B	X	B	X	X	X	X	A	X	X	X	A	X	X	B	B	A	X	B	X	B	A	X	X	X	B	X	A	A	A	B	X	X	A	X	B	X	X	X	A	B	B	B	X	X
GM08:47706704	X	X	B	X	B	X	B	X	X	X	X	A	X	X	X	A	X	X	B	B	A	X	B	X	B	A	X	X	X	B	X	A	A	A	X	X	X	A	X	B	X	X	X	A	B	B	B	X	X
GM08:47747059	X	X	B	X	B	X	B	X	X	X	X	A	X	X	X	A	X	X	B	B	A	X	B	B	B	A	B	A	X	B	X	A	A	A	X	X	X	A	X	B	X	X	X	A	B	B	B	X	X
GM08:47770836	X	X	B	X	B	X	B	X	X	X	X	A	X	X	X	A	X	X	B	B	A	X	B	X	B	A	X	A	X	B	X	A	A	A	X	X	X	A	X	B	X	X	X	A	B	B	B	X	X
GM09:458254	A	X	X	X	B	X	B	X	A	X	B	X	A	B	X	B	A	A	B	X	X	X	X	A	X	A	X	X	B	A	B	X	B	B	X	A	X	B	X	X	B	B	X	X	A	X	X	B	A
GM09:487193	A	X	X	X	B	X	B	X	A	X	X	X	A	B	X	B	A	A	B	B	X	B	X	A	X	A	X	X	B	A	B	X	B	B	X	A	X	B	X	X	B	B	X	X	A	X	X	B	A
GM09:635501	A	X	X	X	B	X	B	X	A	X	X	X	A	B	X	X	A	A	B	X	X	X	X	A	X	A	X	X	B	A	B	X	B	B	X	A	X	B	X	X	B	B	X	X	A	X	X	B	A
GM09:901341	A	X	X	A	B	X	B	X	A	A	X	A	A	B	X	X	A	A	B	X	X	X	X	A	X	A	B	B	B	A	B	X	B	B	B	A	X	B	B	X	B	B	X	X	A	A	B	B	A
GM09:1176807	A	X	X	X	B	X	B	X	A	X	X	A	A	B	X	X	A	A	B	X	B	X	X	A	X	A	X	X	B	A	B	X	B	B	X	A	X	B	X	X	B	B	X	X	X	X	X	B	A
GM09:1592264	A	X	B	X	B	X	B	X	A	X	X	A	A	B	X	X	A	A	B	X	B	X	X	A	X	A	X	X	B	A	B	X	B	B	X	A	B	B	X	X	B	B	X	X	X	X	X	B	A
GM09:1592358	A	X	B	X	B	A	B	X	A	X	X	A	A	B	X	X	A	A	B	X	B	X	X	A	X	A	X	X	B	A	B	X	B	B	X	A	B	B	X	X	B	B	X	X	X	X	X	B	A
GM09:1880128	A	X	B	X	B	A	B	X	A	X	X	A	A	B	X	X	A	A	B	X	B	X	X	A	X	A	X	X	B	A	B	X	B	B	X	A	B	B	X	X	B	B	X	X	X	X	X	B	A
GM09:2026743	A	X	B	X	B	A	B	X	A	X	X	A	A	B	X	X	A	A	B	X	B	X	X	A	X	A	X	X	B	A	B	X	B	X	X	A	B	B	X	X	B	B	X	X	X	X	X	B	A
GM09:2131896	A	X	B	X	B	A	B	X	A	X	X	A	A	B	X	X	A	A	B	X	B	X	X	A	X	A	X	X	B	A	B	X	B	X	X	A	B	B	X	X	B	B	X	X	X	X	X	B	A
GM09:2138617	A	X	B	X	B	A	B	X	A	X	X	A	A	B	X	X	A	A	B	X	B	X	X	A	X	A	X	X	B	A	B	X	B	X	X	A	B	B	X	X	B	B	X	X	X	X	X	B	A
GM09:2259045	A	X	B	X	B	A	B	X	A	X	X	A	A	B	X	X	A	A	B	X	B	X	X	A	X	A	X	X	B	A	B	X	B	X	X	A	B	B	X	X	B	B	X	X	X	X	X	B	A
GM09:2735767	A	X	B	X	B	A	B	X	A	X	X	A	A	B	X	X	A	A	B	X	B	X	X	A	X	A	B	X	B	A	B	X	B	X	X	A	B	B	X	X	B	B	X	X	X	X	X	B	A
GM09:2757113	A	X	B	X	B	A	B	X	A	X	X	A	A	B	X	X	A	A	A	X	B	X	X	A	X	A	B	X	B	A	B	X	B	X	X	A	B	B	X	X	B	B	X	X	X	X	X	B	A
GM09:2823122	A	X	B	X	B	A	B	X	A	X	X	A	A	B	X	X	A	A	A	X	B	X	X	A	X	A	B	X	B	A	B	X	B	X	X	A	B	B	X	X	B	B	X	X	X	X	X	B	A
GM09:2866157	A	X	B	X	B	A	B	X	A	X	X	A	A	B	X	X	A	A	A	X	B	X	X	A	X	A	B	X	B	A	B	X	B	X	X	A	B	B	X	X	B	B	X	X	X	X	X	B	A
GM09:3143547	A	X	B	X	B	A	B	X	A	X	X	A	A	B	X	X	A	A	A	X	B	X	X	A	X	A	B	X	B	A	B	X	B	X	X	A	B	B	X	X	B	B	X	X	X	X	X	B	X
GM09:7626819	X	A	B	A	B	A	B	B	A	X	B	A	A	A	X	X	A	A	A	X	B	X	X	B	B	X	X	B	X	A	A	X	X	X	X	X	X	B	B	B	X	A	X	B	X	B	B	X	X
GM09:7657619	X	A	B	A	B	A	B	B	A	X	B	A	X	A	X	X	A	A	A	X	B	X	X	B	B	X	X	B	X	A	A	X	X	A	X	X	X	B	B	B	X	A	X	B	X	B	B	X	X
GM09:7783452	X	A	B	A	B	A	B	B	A	X	B	A	X	A	X	X	A	A	A	X	B	X	X	B	B	X	X	B	X	A	A	X	X	A	X	X	X	B	B	B	X	A	X	B	X	B	B	X	X
GM09:7809228	X	A	B	A	B	A	B	B	A	X	B	A	X	A	X	X	A	A	A	X	B	X	X	B	B	X	X	B	X	A	A	X	X	A	X	X	X	B	B	B	X	A	X	B	X	B	B	X	X
GM09:7844932	X	A	B	A	B	A	B	B	A	X	B	A	X	A	X	X	A	A	A	X	B	X	X	B	B	X	X	B	X	A	A	X	X	A	X	X	X	B	B	B	X	A	X	B	X	B	B	X	X
GM09:7897747	X	A	B	A	B	A	B	B	A	X	B	A	X	A	X	X	A	A	X	X	B	X	X	B	B	X	X	B	X	A	A	X	X	A	X	X	X	B	B	B	X	A	X	B	X	B	B	X	X
GM09:8114042	X	A	B	A	B	A	B	B	A	X	B	A	X	A	X	X	A	A	X	X	B	X	X	B	B	X	X	B	X	A	A	X	X	A	X	X	X	B	B	B	X	A	X	B	X	B	B	X	X
GM09:10626341	X	A	B	A	B	A	B	B	A	X	B	A	X	A	X	X	A	A	X	X	B	X	X	B	B	X	X	B	X	A	A	X	X	A	X	X	X	B	B	B	X	A	B	B	A	B	B	X	X
GM09:10752569	X	A	B	A	B	A	B	B	A	X	B	A	X	A	X	X	A	A	X	X	B	X	X	B	B	X	X	B	X	A	A	X	X	A	X	X	X	B	B	B	X	A	B	B	A	B	B	X	X
GM09:11544656	X	A	B	A	B	A	B	B	A	X	B	A	X	A	X	X	A	A	X	X	B	X	X	B	B	X	X	B	X	A	A	X	X	A	X	X	X	B	B	B	X	A	B	B	A	B	B	X	A
GM09:11930322	X	A	B	A	B	A	B	B	A	X	B	A	X	A	X	X	A	A	X	X	B	X	X	B	B	X	X	B	X	A	A	X	X	A	X	X	X	B	B	B	X	A	B	B	A	B	B	X	A
GM09:12041946	X	X	B	X	B	X	B	B	A	X	B	A	X	A	X	X	A	X	X	X	B	X	X	B	B	X	X	B	X	A	A	X	X	X	X	X	A	B	B	B	X	A	B	B	X	B	B	X	A
GM09:13529567	X	X	B	X	B	X	X	X	X	A	B	X	X	A	X	X	A	X	X	X	A	X	X	X	X	X	B	X	X	X	X	B	A	X	X	X	A	B	B	B	X	X	X	X	X	X	X	X	A
GM09:13626238	X	X	B	X	X	X	X	X	X	A	B	X	X	A	X	X	A	X	X	X	A	X	X	X	X	X	B	X	X	X	X	B	A	X	X	X	A	B	B	B	X	X	X	X	X	X	X	X	A
GM09:13713227	X	X	B	X	X	X	X	X	X	A	B	X	X	A	X	X	A	X	X	X	A	X	X	X	X	X	B	X	X	X	X	B	A	X	X	X	A	B	B	B	X	X	X	X	X	X	X	X	A
GM09:14085374	X	X	B	X	X	X	X	B	X	A	B	X	X	A	X	X	A	X	X	X	A	X	X	X	X	X	B	X	X	X	X	B	A	X	X	X	A	B	B	B	X	X	B	B	X	X	X	X	A
GM09:14089669	X	X	B	X	X	X	X	B	X	A	B	X	X	A	X	X	A	X	X	X	A	X	X	B	X	X	B	X	X	X	X	B	X	X	X	X	X	B	B	B	X	X	B	B	X	X	X	X	X
GM09:14550566	X	X	B	X	X	X	B	B	A	X	B	A	X	A	X	X	A	X	X	X	B	X	X	B	B	X	X	B	X	X	X	X	X	A	X	X	X	B	B	B	X	X	B	B	X	B	B	X	X
GM09:14715768	X	A	B	A	X	A	B	B	A	X	B	A	X	A	X	X	A	A	X	X	B	X	X	B	B	X	X	B	X	X	X	X	X	A	X	X	X	B	B	B	X	X	B	B	A	B	B	X	A
GM09:17769332	X	A	B	A	X	A	B	B	A	X	B	A	X	A	X	X	A	A	X	X	B	X	X	B	B	X	X	B	X	X	X	X	X	A	X	X	X	B	B	B	X	X	B	B	A	B	B	X	A
GM09:19157911	X	A	B	A	X	A	B	B	A	X	B	A	X	A	X	X	A	A	X	X	B	X	X	B	B	X	X	B	X	X	X	X	X	A	X	X	X	B	B	B	X	X	B	B	A	B	B	X	X
GM09:19549283	X	A	B	A	B	A	B	B	A	X	B	A	X	A	X	X	A	A	X	X	B	X	X	B	B	X	X	B	X	A	A	X	X	A	X	X	X	B	B	B	X	A	B	B	A	B	B	X	X
GM09:19558488	X	A	B	A	B	A	B	B	A	X	B	A	X	X	X	X	A	A	X	X	B	X	X	B	B	X	X	B	X	A	A	X	X	A	X	X	X	B	B	B	X	A	B	B	A	B	B	X	X
GM09:19689929	X	A	B	X	B	A	B	B	A	X	B	A	X	X	X	X	A	A	X	X	B	X	X	B	B	X	X	B	X	A	A	X	X	A	X	X	X	B	B	B	X	A	B	B	A	B	B	X	X
GM09:22062949	X	A	B	X	B	A	X	B	A	X	B	A	X	X	X	X	A	A	X	X	B	X	X	B	B	X	X	B	X	A	A	X	X	A	X	X	X	B	B	B	X	A	B	X	A	B	B	X	X
GM09:22153033	X	A	B	X	B	A	X	B	A	X	B	A	X	X	X	X	A	A	X	X	B	X	X	B	B	X	X	B	X	A	A	X	X	A	X	X	X	B	B	B	X	A	B	X	A	B	B	X	X
GM09:23685401	X	A	B	X	B	A	X	B	A	X	B	A	X	X	X	X	A	A	X	X	B	X	X	B	B	X	X	B	X	A	A	X	X	A	X	X	X	B	B	B	X	A	B	X	A	B	X	X	X
GM09:28486078	A	A	B	X	B	A	X	B	A	X	B	A	B	X	X	X	A	A	X	X	B	X	X	B	B	X	X	B	X	A	A	X	X	A	X	X	X	B	B	B	X	A	B	X	A	B	X	X	X
GM09:28488026	A	A	B	X	B	A	X	B	A	X	B	A	B	X	X	X	A	A	X	X	B	X	X	B	B	X	X	B	X	A	A	X	X	A	X	X	X	B	B	B	X	A	B	X	X	B	X	X	X
GM09:28636911	A	A	X	X	B	A	X	B	A	X	B	A	B	X	X	X	A	A	X	X	B	X	X	B	B	X	X	B	X	A	A	X	X	A	X	X	X	X	B	B	X	A	B	X	X	B	X	X	X
GM09:28677066	A	A	X	X	B	A	X	B	A	X	B	A	B	X	X	X	A	A	X	X	B	X	X	B	B	X	X	B	X	A	A	X	X	A	X	X	X	X	B	B	X	A	B	X	X	B	X	X	X
GM09:28832425	A	A	X	X	B	A	X	B	A	X	B	A	B	X	X	X	A	A	X	X	B	X	X	B	B	X	X	B	X	A	A	X	X	A	X	X	X	X	B	B	X	A	B	X	X	B	X	X	X
GM09:28881785	A	A	X	X	B	A	X	B	A	X	B	A	B	X	X	X	A	A	X	X	B	X	X	B	B	X	X	B	X	A	A	X	X	A	X	X	X	X	B	B	X	A	B	X	X	B	X	X	X
GM09:29146908	A	A	X	X	B	A	X	B	A	X	B	A	B	X	X	X	A	A	X	X	B	X	X	B	B	X	X	B	X	A	A	X	X	A	X	X	X	X	B	B	X	A	B	X	X	B	X	X	X
GM09:29327619	A	A	X	X	B	A	X	B	A	B	B	A	B	X	X	X	A	A	X	X	B	X	X	B	B	X	X	B	X	A	A	X	X	A	X	X	X	X	B	B	X	A	B	X	X	B	A	X	X
GM09:29695214	A	A	X	X	B	A	X	B	A	B	B	A	B	X	X	X	A	A	X	X	B	X	X	B	B	X	X	B	X	A	A	X	X	A	X	X	X	X	B	B	X	A	B	X	X	B	X	X	X
GM09:31099441	A	A	X	X	B	A	X	B	A	B	B	A	B	X	X	X	A	A	X	X	B	X	X	B	B	X	X	B	X	A	A	X	X	A	X	X	X	X	B	B	X	A	B	X	X	B	X	X	X
GM09:31867735	A	A	X	X	B	A	X	B	A	B	B	A	B	X	X	X	A	A	X	X	B	X	X	B	B	X	X	B	X	A	A	X	X	A	X	X	X	X	B	B	X	A	B	X	X	B	X	X	X
GM09:31968840	A	A	X	X	B	A	X	B	A	B	B	A	B	X	X	X	A	A	X	X	B	X	X	B	B	X	X	B	X	A	A	X	X	A	X	X	X	X	B	B	X	A	B	X	X	B	X	X	X
GM09:32357287	A	A	X	X	B	A	X	B	A	B	B	A	B	X	X	X	A	A	A	X	B	X	X	B	B	X	X	B	X	A	A	X	X	A	X	X	X	X	B	B	X	A	B	X	X	B	X	X	X
GM09:32363865	A	A	X	X	B	A	X	B	A	B	B	A	B	X	X	X	A	A	A	X	B	X	X	B	B	X	X	B	X	A	A	X	X	A	X	X	X	X	B	B	X	A	B	X	X	B	X	X	X
GM09:32483150	A	A	X	X	B	A	X	B	A	B	B	A	B	X	X	X	A	A	X	X	B	X	X	B	B	X	X	B	X	A	A	X	X	A	X	X	X	X	B	B	X	A	B	X	X	B	X	X	X
GM09:32604674	A	A	X	X	B	A	X	B	A	B	B	A	B	X	X	X	A	A	X	X	B	X	X	B	B	X	X	B	X	A	A	X	X	A	X	X	X	X	B	B	X	A	B	X	X	B	X	X	X
GM09:32652299	A	A	X	X	B	A	X	B	A	B	B	A	B	X	X	X	A	A	X	X	B	X	X	B	B	X	X	B	X	A	A	X	X	A	X	X	X	X	B	B	X	A	B	X	X	B	X	X	X
GM09:32832878	A	A	X	X	B	A	X	B	A	B	B	A	B	X	X	X	A	A	X	X	B	X	X	B	B	X	X	B	X	A	A	X	X	A	X	X	X	X	B	B	X	A	B	X	X	B	X	X	X
GM09:33561287	A	A	X	X	B	A	X	B	A	X	B	A	B	X	X	X	A	A	X	X	B	X	X	B	B	X	X	B	X	A	A	X	X	A	X	X	X	X	B	B	X	A	B	X	X	B	X	B	X
GM09:33588373	A	A	X	X	B	A	X	B	A	X	B	A	B	X	X	X	A	A	X	X	B	X	X	B	B	X	X	B	X	A	A	X	X	A	X	X	X	X	B	B	A	A	B	X	X	B	X	B	X
GM09:34501955	A	A	X	X	B	A	X	B	A	X	B	A	B	X	X	X	A	A	X	X	B	X	X	B	B	X	X	B	X	A	A	X	X	A	X	X	X	X	B	B	A	A	B	X	X	B	X	B	X
GM09:35288428	A	A	X	X	B	A	X	B	A	X	B	A	B	X	X	X	A	A	X	X	B	X	X	B	B	X	X	B	X	A	A	X	X	A	X	X	X	X	B	B	A	A	B	X	X	B	X	B	X
GM09:35896741	A	A	X	X	B	A	X	B	A	X	B	A	B	X	X	X	A	A	X	X	B	X	X	B	B	X	X	B	X	A	A	X	A	A	X	X	X	X	B	X	A	A	B	X	X	B	X	X	X
GM09:36044286	A	A	X	X	B	A	X	B	A	X	B	A	B	X	X	X	A	A	X	X	B	X	X	B	B	X	X	B	X	A	A	X	A	A	X	X	X	X	B	X	A	A	B	X	X	B	X	X	X
GM09:36835253	A	A	X	X	B	A	X	B	A	X	B	A	B	X	X	X	A	A	X	X	X	X	X	B	B	X	X	B	X	A	A	X	A	A	X	X	X	X	B	X	A	A	B	X	X	B	X	X	X
GM09:37047807	A	A	X	X	B	A	X	B	A	X	B	A	B	X	X	X	A	A	X	X	X	X	X	B	B	X	X	B	X	A	A	X	A	A	X	X	X	X	B	X	A	A	B	X	X	B	X	X	X
GM09:37606379	A	A	X	A	B	A	X	B	A	X	B	A	B	X	X	X	A	A	X	X	X	X	X	B	B	X	X	B	X	A	A	X	A	A	X	X	X	X	B	X	A	A	X	X	X	B	X	X	X
GM09:37606692	A	A	X	A	B	A	X	B	A	X	B	A	B	X	X	X	A	A	X	X	X	X	X	B	B	X	X	B	X	A	A	X	A	A	X	X	X	X	B	X	A	A	B	X	X	B	X	X	X
GM09:37670600	A	A	X	A	B	A	X	B	A	X	B	A	B	X	X	X	X	A	X	X	X	X	X	B	B	X	X	B	X	A	A	X	A	A	X	X	X	X	B	X	A	A	B	X	B	B	X	X	X
GM09:43036466	A	A	X	A	X	X	X	X	A	X	B	A	B	X	X	X	X	A	A	X	A	X	X	B	B	X	X	A	X	A	A	B	A	A	X	X	X	A	B	X	A	A	X	B	B	A	X	X	X
GM09:43079444	B	B	X	A	X	X	X	X	A	X	B	A	A	X	X	X	X	A	A	A	A	A	A	A	A	A	X	A	X	A	X	B	A	X	X	X	X	A	B	X	A	A	X	B	B	A	X	X	X
GM09:45208757	B	B	X	A	X	X	X	X	A	X	X	A	A	X	X	X	X	A	A	A	A	A	A	A	A	A	X	A	X	A	X	B	A	X	X	X	X	A	B	X	A	A	X	B	B	A	X	A	B
GM09:45350490	B	B	X	A	X	X	X	X	A	X	X	A	A	X	A	X	X	A	A	A	A	A	A	A	A	A	X	A	X	A	X	B	A	X	X	A	X	A	B	X	A	A	X	B	B	A	X	A	B
GM09:45361921	B	B	X	A	X	X	X	X	A	X	X	A	A	X	A	X	X	A	A	A	A	A	A	A	A	A	X	A	X	A	X	B	A	X	X	A	A	A	B	A	A	A	X	B	B	A	X	A	B
GM09:45365930	B	B	X	A	X	X	X	X	A	X	X	A	A	X	A	X	X	A	A	A	A	A	A	A	A	A	X	A	X	A	X	B	A	X	X	A	A	A	B	A	A	A	X	B	B	A	X	A	B
GM09:45393854	B	B	B	A	X	X	X	X	A	X	X	A	A	X	A	X	X	A	A	A	A	A	A	A	A	A	X	A	X	A	X	B	A	X	X	A	A	A	B	A	A	A	X	B	B	A	X	A	B
GM09:45484895	B	B	B	A	X	X	X	X	A	X	X	A	A	X	A	X	X	A	A	A	A	A	A	A	A	A	X	A	X	A	X	B	A	X	X	A	A	A	B	A	A	A	X	B	B	A	X	A	B
GM09:45657860	B	B	B	A	X	X	X	X	A	X	X	A	A	X	A	X	X	A	A	A	A	A	A	A	A	A	X	A	X	X	X	B	X	X	X	A	A	A	B	A	A	A	X	B	B	A	X	A	B
GM09:45766109	B	B	B	A	X	X	X	X	A	X	X	A	A	X	A	X	X	A	A	A	A	A	A	A	A	A	X	A	X	X	X	B	X	X	X	A	A	X	B	A	A	A	X	B	B	A	X	A	B
GM09:46183279	B	B	B	A	X	X	X	X	A	X	X	A	A	X	A	X	X	A	A	A	A	A	A	A	A	A	X	A	X	X	X	B	B	X	X	A	A	X	B	A	A	A	X	B	B	A	X	A	B
GM09:46290891	B	B	B	A	X	X	X	X	A	X	X	A	A	X	A	X	X	A	A	A	A	A	A	A	A	A	X	A	X	X	X	B	B	X	X	A	A	X	B	A	A	A	X	B	B	A	X	A	B
GM09:46487290	B	B	B	A	X	X	X	X	A	X	X	A	A	X	A	X	X	A	A	A	A	A	A	A	A	A	X	A	X	X	X	B	B	X	X	A	A	X	B	A	A	A	X	B	B	A	X	A	B
GM09:46693716	B	B	B	A	X	X	X	X	A	X	X	A	A	X	A	X	X	A	A	A	A	A	A	A	A	A	X	A	X	X	X	B	B	X	X	A	A	X	B	A	X	A	X	B	B	A	X	A	B
GM09:46814743	B	B	B	A	X	X	X	X	A	X	X	A	A	X	A	X	X	A	A	A	A	A	A	A	A	A	X	A	X	X	X	B	B	X	X	A	A	X	B	A	X	A	X	B	B	A	X	A	B
GM09:46816351	B	B	B	A	X	X	X	X	A	X	X	A	A	X	A	X	X	A	A	A	A	A	A	A	A	A	B	A	X	X	X	B	B	X	X	A	A	X	B	A	X	A	X	B	B	A	X	A	B
GM09:46973959	B	B	B	A	X	X	X	X	A	X	X	A	A	X	A	X	X	A	A	A	A	A	A	A	A	A	B	A	B	X	X	B	B	X	X	A	A	X	B	A	X	A	X	B	B	A	X	A	B
GM09:46975246	B	B	B	A	X	X	X	X	X	X	X	A	A	X	A	X	X	A	A	A	A	A	A	A	A	A	B	A	B	X	X	B	B	X	X	A	A	X	B	A	X	A	X	B	B	A	X	A	B
GM09:47005920	B	B	B	A	X	X	X	X	X	X	X	A	A	X	A	X	X	A	A	A	A	A	X	A	A	A	B	A	B	X	X	B	B	X	X	A	A	X	B	A	X	A	X	B	B	A	X	A	B
GM09:47241664	B	B	B	A	X	X	X	X	X	X	X	A	A	X	A	X	X	A	A	A	A	A	X	A	A	A	B	A	B	X	X	B	B	X	X	A	A	X	B	A	X	A	X	B	B	A	X	A	B
GM09:47283864	B	B	B	A	X	X	X	X	X	X	X	A	A	X	A	X	X	A	A	A	A	A	X	A	A	A	B	A	B	X	X	B	B	X	X	A	A	X	B	A	X	A	X	B	B	A	X	A	B
GM09:47390380	B	B	B	A	X	B	X	X	X	X	X	A	A	X	A	X	X	A	A	A	A	A	X	A	A	A	B	A	B	X	X	B	B	X	X	A	A	X	B	A	X	A	X	B	B	A	X	A	B
GM09:47538385	B	B	B	A	X	B	X	X	X	X	X	A	A	X	A	X	X	A	A	A	A	A	X	A	A	A	B	A	B	X	X	B	B	X	X	A	A	X	B	A	X	A	X	B	B	A	X	A	B
GM09:47649646	B	B	B	A	X	B	X	X	X	X	X	A	A	X	A	X	X	A	A	A	A	A	X	A	A	A	B	A	B	X	X	B	B	X	X	A	A	X	B	A	X	A	X	B	B	A	X	A	B
GM09:47842608	B	B	B	A	X	B	X	X	X	X	X	A	A	X	A	X	X	A	A	A	A	A	X	A	A	A	B	A	B	X	X	B	B	X	X	A	A	X	B	A	X	A	X	B	B	A	X	A	B
GM09:48140301	B	B	B	A	X	B	X	X	X	X	X	A	X	X	A	X	A	A	A	A	A	A	X	A	A	A	B	A	B	X	X	B	B	X	X	A	A	X	B	A	X	A	X	B	B	A	X	A	B
GM09:48336284	B	B	B	A	X	B	X	X	X	X	X	A	X	X	A	X	X	A	A	A	A	A	X	A	A	A	B	A	X	X	X	B	B	X	X	A	A	X	B	A	X	A	X	B	B	A	X	A	B
GM09:48437955	B	B	B	A	B	B	X	X	X	X	X	A	X	X	A	X	X	A	A	A	A	A	X	A	A	A	B	A	X	X	X	B	B	X	X	A	A	X	B	A	X	A	B	B	B	A	X	A	B
GM09:48452237	B	X	B	A	X	B	X	X	X	X	X	A	X	X	A	X	X	A	A	A	A	A	X	A	A	A	B	A	X	X	X	B	B	X	X	A	A	X	B	A	X	A	X	B	B	A	X	A	B
GM09:48481360	X	X	X	A	X	B	X	X	X	A	X	A	X	X	A	X	X	A	A	A	A	A	X	A	A	A	X	A	A	X	B	B	X	A	X	A	A	X	B	A	B	A	X	X	X	A	X	A	B
GM09:48559995	B	X	B	A	X	B	X	X	X	X	X	A	X	X	A	X	X	A	A	A	A	A	X	A	A	A	B	A	X	X	X	B	B	X	X	A	A	X	B	A	X	A	X	B	B	A	X	A	B
GM10:1462978	X	B	B	B	A	X	X	X	B	A	X	X	B	X	B	X	X	A	X	X	X	X	B	A	B	B	X	A	X	X	X	B	A	A	A	B	A	X	A	X	B	B	A	B	B	X	X	A	X
GM10:1594921	X	B	B	B	A	X	X	X	B	A	X	X	B	X	B	X	X	A	X	X	X	X	B	X	B	B	X	A	X	X	X	B	A	A	A	B	A	X	A	X	B	B	A	B	B	X	X	A	X
GM10:1595239	X	X	B	B	A	X	X	X	B	A	X	X	B	X	B	X	X	A	X	X	X	X	B	X	B	B	X	A	X	X	X	B	A	A	A	B	A	X	A	X	B	B	A	B	B	X	X	A	X
GM10:1942283	A	X	B	B	A	X	X	X	B	A	X	X	B	X	B	X	X	A	X	X	X	X	B	X	B	B	X	A	X	X	B	B	A	A	A	B	A	A	A	X	B	B	A	B	B	B	X	X	X
GM10:1942397	A	X	B	B	A	X	X	X	B	A	X	X	B	X	B	X	X	A	X	X	X	X	B	X	B	B	X	A	X	X	B	B	A	A	A	B	A	A	A	X	B	B	A	B	B	X	X	A	X
GM10:2837610	A	B	X	B	X	X	B	X	B	A	A	X	X	X	B	X	X	A	X	X	X	X	B	B	B	B	X	A	X	X	B	B	A	X	A	B	X	A	X	X	X	B	A	B	B	A	X	X	X
GM10:2845399	A	B	X	B	X	X	B	X	B	A	A	X	X	X	B	X	X	A	X	X	X	X	B	B	B	B	A	A	X	X	B	B	A	X	A	B	X	A	X	X	X	B	A	B	B	A	X	X	A
GM10:2895920	A	B	X	B	X	X	B	X	B	A	A	X	X	X	B	X	X	A	X	X	X	X	B	B	B	B	A	A	X	X	B	B	A	X	A	B	X	A	X	X	X	B	A	B	B	A	X	X	A
GM10:2985808	A	B	X	B	X	X	B	X	B	A	A	X	X	X	B	X	X	A	X	X	X	X	B	B	B	B	A	A	X	X	B	B	A	X	A	B	X	A	X	X	X	B	A	B	B	A	X	X	A
GM10:3186868	A	B	X	B	X	X	B	X	B	A	A	X	X	X	B	X	X	A	X	X	X	X	B	B	B	B	A	A	X	X	B	B	A	X	A	B	X	A	X	B	X	B	A	B	B	A	X	X	A
GM10:3311680	A	B	X	B	X	X	B	X	B	A	A	X	X	X	B	X	X	A	X	X	X	X	X	B	B	B	A	A	X	X	B	B	A	X	A	B	X	A	X	B	X	B	A	B	B	A	X	X	A
GM10:3454025	A	B	X	B	X	X	B	X	B	A	A	X	X	X	B	X	X	A	X	X	X	X	X	B	B	B	A	A	X	X	B	B	A	X	A	B	X	A	X	B	X	B	A	B	B	A	X	X	A
GM10:3498690	A	B	X	B	X	X	B	X	B	A	A	X	X	X	B	X	X	A	X	X	X	X	X	B	B	B	A	A	X	X	B	B	A	X	A	B	X	A	X	B	X	B	A	B	B	A	X	X	A
GM10:3918958	A	B	X	B	X	X	B	X	B	A	A	X	X	X	B	X	X	A	X	X	X	X	X	B	B	B	A	A	X	X	B	B	A	X	A	B	X	A	X	B	X	B	A	B	B	A	X	X	A
GM10:3947698	A	B	X	B	X	X	B	X	B	A	A	X	X	X	B	X	X	A	X	X	X	X	X	B	B	X	A	A	X	X	B	B	A	X	A	B	X	A	X	B	X	B	A	X	B	A	X	X	A
GM10:4042618	A	B	X	B	X	X	B	B	B	A	A	X	X	X	B	X	X	A	X	X	X	X	X	B	B	X	A	A	X	X	B	B	A	X	A	B	X	A	X	B	X	B	A	X	B	A	X	X	A
GM10:4093743	A	B	X	B	X	X	B	B	B	A	A	X	X	X	B	X	X	A	X	X	X	X	X	B	B	X	A	A	X	X	B	B	A	X	A	B	X	A	X	B	X	B	A	X	B	A	X	X	A
GM10:4144672	A	B	X	B	X	X	B	B	B	A	A	X	X	X	B	X	X	A	X	X	X	X	X	B	B	X	A	A	X	X	B	B	A	X	A	B	X	A	X	B	X	B	A	X	B	A	X	X	A
GM10:4296951	A	B	X	B	X	X	B	B	B	A	A	X	X	X	B	X	X	A	X	X	X	X	X	B	X	X	A	A	X	X	B	B	A	X	A	B	X	A	X	B	X	B	A	X	B	A	X	X	A
GM10:4603708	A	X	X	B	X	X	B	B	B	A	A	X	X	X	B	X	X	A	X	X	X	A	X	B	X	X	A	A	X	X	B	B	A	X	A	B	X	A	X	B	X	B	A	X	B	A	X	X	A
GM10:4624770	A	X	X	B	X	X	B	B	B	A	A	X	X	X	B	X	X	A	X	X	X	A	X	B	X	X	A	A	X	X	B	B	A	X	A	B	X	A	X	B	X	B	A	X	B	A	X	X	A
GM10:5102457	A	X	X	B	X	X	B	B	B	A	A	X	X	X	B	X	X	B	B	X	X	A	X	B	X	X	A	A	X	X	B	B	A	X	A	B	B	X	X	B	X	B	A	A	A	A	X	X	A
GM10:5417248	A	X	X	B	B	X	B	B	B	A	A	X	X	X	B	X	X	B	B	X	X	A	X	B	X	A	A	A	X	X	B	B	A	X	A	B	B	X	X	B	X	B	A	A	A	A	X	X	A
GM10:5423579	A	X	X	B	B	X	B	B	B	A	A	X	X	X	B	X	X	B	B	X	X	A	A	B	X	A	A	A	X	X	B	B	A	X	A	B	B	X	X	B	X	B	A	A	A	A	X	X	A
GM10:5502466	A	X	X	B	B	X	B	B	B	A	A	X	X	X	B	B	X	B	B	X	X	A	A	B	X	A	A	A	X	X	B	B	A	X	A	B	B	X	X	B	X	B	A	A	A	A	X	X	A
GM10:5591282	A	X	X	B	B	X	B	B	B	A	A	X	X	X	B	B	X	B	B	X	X	A	A	B	X	A	A	A	X	X	B	B	A	X	A	B	B	X	X	B	X	B	A	A	A	A	X	X	A
GM10:6388276	A	X	A	B	B	X	B	B	A	A	A	X	X	X	B	B	X	B	B	X	X	A	A	B	X	A	A	A	A	X	B	B	A	X	A	B	B	X	X	X	X	B	A	A	A	A	X	X	A
GM10:7155591	A	X	A	B	B	X	B	B	A	A	A	X	X	X	B	B	X	B	B	X	X	A	A	X	X	A	A	A	A	X	B	X	A	X	A	B	B	X	X	X	X	B	A	A	A	A	X	X	A
GM10:7251538	A	X	A	B	B	X	B	B	A	A	A	X	X	X	B	B	X	B	B	X	X	A	A	X	X	A	A	A	A	X	B	X	A	X	A	B	B	X	X	X	X	X	A	A	A	A	X	X	A
GM10:7479743	A	X	A	B	B	X	B	B	A	A	A	X	X	X	B	B	X	B	B	X	X	A	A	X	X	A	A	A	A	X	B	X	A	X	A	B	B	X	X	X	X	X	A	A	A	A	X	X	A
GM10:7580008	A	X	A	B	B	X	B	B	A	A	A	X	X	X	B	B	X	B	B	X	X	A	A	X	X	A	A	A	A	X	B	X	A	X	A	B	B	X	X	X	X	X	A	A	A	A	X	X	A
GM10:7788674	A	X	A	B	B	X	B	B	A	A	A	X	X	X	B	B	X	B	B	X	X	A	A	X	X	A	A	A	A	X	B	X	A	X	A	B	B	X	X	X	X	X	A	A	A	A	X	X	A
GM10:8300648	A	X	A	B	B	X	B	B	A	A	A	X	X	X	B	B	X	B	B	X	X	A	A	X	X	A	A	A	A	X	B	X	A	X	A	B	B	X	X	X	X	X	A	A	A	A	X	X	A
GM10:8429411	A	X	A	B	B	X	B	B	A	A	A	X	X	X	B	B	X	B	B	X	X	A	A	X	X	A	A	A	A	X	B	X	A	X	A	B	B	X	X	X	X	X	A	A	A	A	X	X	A
GM10:9111767	A	X	A	B	B	X	B	B	A	A	A	X	X	X	B	B	X	B	B	X	X	A	A	X	X	A	A	A	A	X	B	X	A	X	A	B	B	X	X	X	X	X	A	A	A	A	X	X	A
GM10:10127286	A	X	A	B	B	X	B	B	A	A	A	X	X	X	B	B	X	B	B	X	X	A	A	X	X	A	A	A	A	X	B	X	A	X	A	B	B	X	X	X	X	X	A	A	A	A	X	X	A
GM10:10231650	A	X	A	B	B	X	B	B	A	A	A	X	X	X	B	B	B	B	B	X	X	A	A	X	X	A	A	A	A	X	B	X	A	X	A	B	B	X	X	X	X	X	A	A	A	A	X	X	A
GM10:12855467	A	X	A	B	B	X	B	B	A	A	A	X	X	X	B	B	B	B	B	X	X	A	A	X	X	A	A	A	A	X	B	X	A	X	A	B	B	X	X	X	X	X	A	A	A	A	X	X	A
GM10:12946407	A	X	A	B	B	X	B	B	A	A	A	X	X	X	B	B	B	B	B	X	X	A	A	X	X	A	A	A	A	X	B	X	A	A	A	B	B	X	X	X	X	X	A	A	A	A	X	X	A
GM10:13256754	A	X	A	B	B	X	B	B	A	A	A	X	X	X	B	B	B	B	B	X	B	A	A	X	X	A	A	A	A	X	B	X	A	A	A	B	B	X	X	X	X	X	A	A	A	A	X	X	A
GM10:13358967	A	X	A	B	B	X	B	B	A	A	A	X	X	X	B	B	B	B	B	X	B	A	A	X	X	A	A	A	A	X	B	X	A	A	A	B	B	X	X	X	X	X	A	A	A	A	X	X	A
GM10:17115623	A	X	A	B	B	X	B	B	A	A	A	X	X	X	B	B	B	B	B	X	B	A	A	X	X	A	A	A	A	X	B	X	A	A	A	B	B	X	X	X	X	X	A	A	A	A	X	X	A
GM10:17593646	A	X	A	B	B	X	B	B	A	A	A	X	X	X	B	B	B	B	B	X	B	A	A	X	X	A	A	A	A	X	B	X	A	A	A	B	B	X	X	X	X	X	A	A	A	A	X	X	A
GM10:17933487	A	X	A	B	B	X	B	B	A	A	A	X	X	X	B	B	B	B	B	X	B	A	A	X	X	A	A	A	A	X	B	X	A	A	A	B	B	X	X	X	X	A	A	A	A	A	X	X	A
GM10:18288518	A	X	A	B	B	X	B	B	A	A	A	X	X	X	B	B	B	B	B	X	B	A	A	X	X	A	A	A	A	X	B	X	A	A	A	B	B	X	X	X	X	X	A	A	A	A	X	X	A
GM10:19620293	A	X	A	B	B	X	B	B	A	A	A	X	X	X	B	B	B	B	B	X	B	A	A	X	X	A	A	A	A	X	B	X	A	A	A	B	B	X	X	X	X	X	A	A	A	A	X	X	A
GM10:20485060	A	X	A	B	B	X	B	B	A	A	A	X	X	X	B	B	B	B	B	X	B	A	A	X	X	A	A	A	A	X	B	X	A	A	A	B	B	X	X	X	X	X	A	A	A	A	X	X	A
GM10:25119237	A	B	A	B	B	A	B	B	A	A	A	X	X	X	B	B	B	B	B	X	B	A	A	X	X	A	A	A	A	X	B	X	A	A	A	B	B	X	B	X	B	B	A	A	A	A	X	X	A
GM10:25128745	A	B	A	B	B	X	B	B	A	A	A	X	X	X	B	B	B	B	B	X	B	A	A	X	X	A	A	A	A	X	B	X	A	A	A	B	B	X	X	X	X	B	A	A	A	A	X	X	A
GM10:26321340	A	B	A	B	B	X	B	B	A	A	A	A	B	X	B	B	B	B	B	A	B	A	A	X	X	A	A	A	A	X	B	X	A	A	A	B	B	B	X	A	X	A	A	A	A	A	X	B	A
GM10:28254505	A	B	A	B	B	X	B	B	A	A	A	A	X	X	B	B	B	B	B	A	B	A	A	X	X	A	A	A	A	B	B	X	A	A	A	B	B	B	X	A	X	B	A	A	A	A	X	B	A
GM11:446923	X	A	X	X	B	B	B	X	A	A	A	X	X	A	B	X	B	A	A	X	X	X	B	X	X	B	B	A	A	X	X	B	X	X	X	A	A	B	X	X	X	B	X	X	A	X	A	X	X
GM11:667879	X	A	X	A	B	B	B	X	A	A	A	X	X	A	B	X	B	A	X	X	X	B	B	X	X	B	B	A	A	A	X	B	X	X	X	A	A	B	X	X	X	B	X	X	X	X	A	X	X
GM11:676727	X	A	X	A	B	B	B	X	A	A	A	X	X	A	B	X	B	A	X	X	X	B	B	X	X	B	B	A	A	A	X	B	X	X	X	A	A	B	X	X	X	B	X	X	X	X	A	X	X
GM11:1053920	X	A	X	A	B	B	B	X	A	A	A	X	X	A	B	X	B	X	X	X	X	B	B	X	X	B	B	A	A	A	X	B	X	X	X	A	A	B	X	X	X	B	X	X	X	X	A	X	X
GM11:1099395	X	A	X	A	B	B	B	X	A	A	A	X	X	A	B	X	B	X	X	X	X	B	B	X	X	B	B	A	A	A	X	B	X	X	X	A	A	B	X	X	X	B	X	X	X	X	A	X	X
GM11:1333289	X	A	X	A	B	B	B	X	A	A	A	X	X	A	B	X	B	B	X	X	X	B	B	X	X	B	B	A	A	A	X	B	X	X	X	A	A	B	X	X	X	B	X	X	B	X	A	X	X
GM11:1354400	X	A	X	A	B	B	B	X	A	A	A	X	X	A	B	X	B	B	X	X	X	B	B	X	X	B	B	A	A	A	X	B	X	X	X	A	A	B	X	X	X	B	X	X	B	X	A	X	X
GM11:1389038	X	A	X	A	B	B	B	X	A	A	A	X	X	A	B	X	B	B	X	X	X	B	B	X	X	B	B	A	A	A	X	B	X	X	X	A	A	B	X	X	X	B	X	X	B	X	A	X	X
GM11:1617526	X	A	X	A	B	B	B	X	A	A	A	X	X	A	B	X	B	B	X	X	X	B	B	X	X	B	B	A	A	A	X	B	X	X	X	A	A	B	X	X	X	B	X	X	B	X	A	X	X
GM11:1873243	X	A	X	A	B	B	B	X	A	A	A	X	X	A	B	X	B	B	X	X	X	B	B	X	X	B	B	A	A	A	X	B	X	X	X	A	A	X	X	X	X	B	X	X	B	X	A	X	X
GM11:1968549	X	A	X	A	B	B	B	X	A	A	A	X	X	A	B	B	B	B	X	X	X	B	B	X	X	B	B	A	A	A	X	B	X	X	X	A	A	X	X	X	X	B	X	X	B	X	A	X	X
GM11:1968786	X	A	X	A	B	B	B	X	A	A	A	X	X	A	B	B	B	B	X	X	X	B	B	X	X	B	B	A	A	A	X	B	X	X	X	A	A	X	X	X	X	B	X	X	B	X	A	X	X
GM11:2662888	X	A	X	A	B	B	B	X	A	A	A	X	A	A	B	B	B	B	X	X	X	B	X	X	X	B	X	X	A	A	X	B	X	X	B	A	B	X	X	X	X	B	X	X	B	X	A	X	X
GM11:2696834	X	A	X	A	B	B	B	X	A	A	A	X	A	A	B	B	B	B	X	X	X	B	X	X	X	B	X	X	A	A	X	B	X	X	B	A	B	X	X	X	X	B	X	X	B	X	A	A	X
GM11:2730006	X	A	X	A	B	B	X	X	A	A	A	X	A	A	B	B	B	B	X	X	X	B	X	X	X	B	X	X	A	A	X	B	X	X	B	A	B	X	X	X	X	B	X	X	B	X	A	A	X
GM11:3016770	X	A	X	A	B	B	X	X	A	A	A	X	A	A	B	B	B	B	X	X	X	B	X	X	X	B	X	X	A	A	X	B	X	X	B	A	B	X	X	X	X	B	X	X	B	X	A	A	X
GM11:3298485	X	A	X	A	B	B	X	X	A	A	A	X	A	A	B	B	B	B	X	X	X	B	X	X	X	B	X	X	A	A	X	B	X	X	B	A	B	X	X	X	X	B	X	X	B	X	A	A	X
GM11:3758635	X	A	X	A	B	B	X	X	A	A	A	X	A	A	B	B	B	B	X	X	X	B	X	X	X	B	X	X	A	A	X	B	X	X	B	A	B	X	X	X	X	X	A	X	B	X	A	A	X
GM11:3779452	X	A	X	A	B	B	X	X	A	A	A	X	X	A	B	B	B	B	X	X	X	B	X	X	X	B	X	X	A	A	X	B	X	X	B	A	B	X	X	X	X	X	A	X	B	X	A	A	X
GM11:4204677	X	A	X	A	B	B	X	X	A	A	A	X	X	A	B	B	B	B	X	X	X	B	X	X	X	B	X	X	A	A	X	B	X	X	B	A	B	X	X	X	X	X	X	X	B	X	A	A	X
GM11:4237155	X	A	X	A	B	B	X	X	A	A	A	X	X	A	B	B	B	B	X	X	X	B	X	X	X	B	X	X	A	A	X	X	X	X	B	A	B	X	X	X	X	X	X	X	B	X	A	A	X
GM11:4257271	X	A	X	A	B	B	X	X	A	A	A	X	X	A	B	B	B	B	X	X	X	B	X	X	X	B	X	X	A	A	X	X	X	X	B	A	B	X	X	X	X	X	X	X	B	X	A	A	X
GM11:4356051	X	A	X	A	B	B	X	X	A	A	A	X	X	A	B	B	B	B	X	X	X	B	X	X	X	B	X	X	A	A	X	X	X	X	B	A	B	X	X	X	X	X	A	X	B	X	A	A	X
GM11:4368030	X	A	X	A	B	B	X	X	A	A	A	X	X	A	B	B	B	B	X	X	X	B	X	X	X	B	X	X	A	A	X	X	X	X	B	A	B	X	X	X	X	X	A	X	B	X	A	A	X
GM11:4411768	X	A	X	A	B	B	X	X	A	A	A	X	X	A	B	B	B	B	X	X	X	B	X	X	X	B	X	X	A	A	X	X	X	X	B	A	B	X	X	X	X	X	A	X	B	X	A	A	X
GM11:4418228	X	A	X	A	B	B	X	X	A	A	A	X	X	A	B	B	B	B	X	X	X	B	X	X	X	B	X	X	A	A	X	X	X	X	B	A	B	X	X	X	X	X	A	X	B	X	A	A	X
GM11:4420134	X	A	X	A	B	B	X	X	A	A	A	X	X	A	B	B	B	B	X	X	X	B	X	X	X	B	X	X	A	A	X	X	X	X	B	A	B	X	X	X	X	X	A	X	B	X	A	A	X
GM11:4712550	X	A	X	A	B	B	X	X	A	A	A	X	X	A	X	B	B	B	X	X	X	B	X	X	X	B	X	X	A	A	X	X	X	X	B	A	B	X	X	X	X	X	A	X	B	X	B	A	X
GM11:4836389	X	A	X	A	B	B	X	X	A	A	A	X	X	A	X	B	B	B	X	X	X	X	X	X	X	B	X	X	A	A	X	X	X	X	B	A	B	X	X	X	X	X	A	X	B	X	B	A	X
GM11:4860419	X	A	X	A	B	B	X	X	A	A	A	X	X	A	X	B	B	B	X	X	X	X	X	X	X	B	X	X	A	A	X	X	X	X	B	A	B	X	X	X	X	X	A	X	B	A	B	A	X
GM11:5098527	X	A	X	A	B	B	X	X	A	A	A	X	X	A	X	B	B	B	X	X	X	X	X	X	X	B	X	X	A	A	X	X	X	X	B	A	B	X	X	X	X	X	A	X	B	A	B	A	X
GM11:5291716	X	A	X	A	B	B	X	X	A	A	A	X	X	A	X	B	B	B	X	X	X	X	X	X	X	B	X	X	A	A	X	X	X	X	B	A	B	X	X	X	X	X	A	X	B	A	B	A	X
GM11:5665237	X	A	X	A	X	X	X	X	X	A	A	X	X	A	X	B	B	B	X	X	X	X	X	X	X	X	X	X	A	A	X	X	X	X	B	A	B	X	X	B	X	X	A	X	B	A	B	A	X
GM11:5673178	X	A	X	A	X	X	X	X	X	A	A	X	X	A	X	B	B	B	X	X	X	X	X	X	X	X	X	X	A	A	X	X	X	X	B	A	B	X	X	B	X	X	A	X	B	A	B	A	X
GM11:5673373	X	A	X	A	X	X	X	X	X	A	A	X	X	A	X	B	B	B	X	X	X	X	X	X	X	X	X	X	A	A	X	X	X	X	B	A	B	X	X	B	X	X	A	X	B	A	B	A	X
GM11:5693439	X	A	X	A	X	X	X	X	X	A	A	X	X	A	X	B	B	B	X	X	X	X	X	X	X	X	X	X	A	A	X	X	X	X	B	A	B	X	X	B	X	X	A	X	B	A	B	A	X
GM11:5993561	X	X	X	A	X	X	X	X	X	A	A	X	X	A	X	B	B	B	X	X	X	X	X	X	X	X	X	X	A	A	X	X	X	X	B	A	B	X	X	B	X	X	A	X	B	A	B	A	X
GM11:6060525	X	X	X	A	X	X	X	X	X	A	A	X	X	A	X	B	B	B	X	X	X	X	X	X	X	X	X	X	A	A	X	X	X	A	B	A	B	X	X	B	X	X	A	X	B	A	B	A	X
GM11:6145362	X	X	X	A	X	X	X	X	X	A	A	X	X	A	X	B	B	B	X	X	X	X	X	X	X	X	X	X	A	A	X	X	X	A	B	A	B	X	X	B	X	X	A	X	B	A	B	A	X
GM11:6155839	X	X	X	A	X	X	X	X	X	A	A	X	X	A	X	B	B	B	X	X	X	X	X	X	X	X	X	X	A	A	X	X	X	A	B	A	B	X	X	B	X	X	A	X	B	A	B	A	X
GM11:6247448	X	X	X	A	X	B	X	X	X	A	A	X	X	A	X	B	B	B	X	X	X	X	X	X	X	X	X	X	A	A	X	X	X	A	B	A	B	X	X	B	X	X	X	X	B	A	B	A	X
GM11:6324789	X	X	X	A	X	B	X	X	X	A	A	X	X	A	X	B	B	B	X	X	X	X	X	X	X	X	X	X	A	A	X	X	X	A	B	A	B	X	X	B	X	X	X	X	B	A	B	A	X
GM11:6333581	X	X	X	A	X	B	X	X	X	A	A	X	X	A	X	B	B	B	X	X	X	X	X	X	X	X	X	X	A	A	X	X	X	A	B	A	B	X	X	B	X	X	X	X	B	A	B	A	X
GM11:6496544	X	X	X	A	X	B	X	X	X	A	A	X	X	A	X	B	B	B	X	X	X	X	X	X	X	X	X	X	A	A	X	X	X	A	B	A	B	X	X	B	X	X	X	X	B	A	B	A	X
GM11:6502176	X	X	X	A	X	B	X	X	X	A	A	X	X	A	X	B	B	B	X	X	X	X	X	X	X	X	X	X	A	A	X	X	X	A	B	A	B	X	X	B	X	X	X	X	B	A	B	A	X
GM11:6704494	X	X	X	A	X	B	X	X	X	A	A	X	X	A	X	B	B	B	X	X	X	X	X	X	X	X	X	X	A	A	X	X	X	A	B	A	B	X	X	B	X	X	X	X	B	A	B	A	X
GM11:6783697	X	X	X	A	X	B	X	X	X	A	A	X	X	A	X	B	B	B	X	X	X	X	X	X	X	X	X	X	A	A	X	X	X	A	B	A	B	X	X	B	X	X	X	X	B	A	B	A	X
GM11:6791474	X	X	X	A	X	B	X	X	X	A	A	X	X	A	X	B	B	B	X	X	X	X	X	X	X	X	X	X	A	A	X	X	X	A	B	A	B	X	X	B	X	X	X	X	B	A	B	A	X
GM11:6792016	X	X	X	A	X	B	X	X	X	A	A	X	X	X	X	B	B	B	X	X	X	X	X	X	X	X	X	X	X	A	X	X	X	A	B	A	B	X	X	B	X	X	X	X	B	A	B	A	X
GM11:6870663	X	X	X	A	X	B	X	X	X	A	A	X	X	X	X	B	B	B	X	X	X	X	X	X	X	X	X	X	X	B	X	X	X	A	B	A	B	X	X	B	X	X	X	X	B	A	B	A	X
GM11:6881899	X	X	X	A	X	B	X	X	X	A	A	X	X	X	X	B	B	B	X	X	X	X	X	X	X	X	X	X	X	B	X	X	X	A	B	A	B	X	X	B	X	X	X	X	B	A	B	A	X
GM11:6903111	X	X	X	A	X	B	X	X	X	A	A	X	X	X	X	X	B	B	X	X	X	X	X	X	X	X	X	X	X	B	X	X	X	A	B	A	B	X	X	B	X	X	X	X	B	X	B	A	X
GM11:11351611	X	A	X	B	X	B	A	B	X	A	X	X	X	X	X	X	B	X	A	X	B	X	X	X	X	B	X	X	X	B	X	X	X	X	B	B	B	X	X	X	X	X	A	X	X	X	X	B	X
GM11:11423432	X	A	X	B	X	B	A	B	X	A	X	X	X	X	X	X	B	X	A	X	B	X	X	X	X	B	X	X	X	B	X	A	X	A	B	B	B	X	A	X	X	X	A	X	X	X	X	B	X
GM11:12589439	X	A	X	B	X	B	A	B	X	A	X	X	X	X	X	X	B	X	A	X	B	X	X	X	X	B	X	X	X	B	X	A	X	X	B	B	B	X	A	X	X	X	A	B	X	X	X	B	X
GM11:13612948	X	A	X	B	X	B	A	B	X	A	X	X	X	X	X	X	B	X	A	X	B	X	X	X	X	B	X	X	X	B	X	A	X	X	B	B	B	X	A	X	X	X	A	X	X	X	X	B	X
GM11:14126735	X	A	X	B	X	B	A	B	X	A	X	X	X	X	X	X	B	X	A	X	B	X	X	X	X	B	X	X	X	B	X	A	X	X	B	B	B	X	A	X	X	X	A	B	X	X	X	B	X
GM11:15467236	X	A	X	B	X	B	A	B	X	A	X	X	X	X	X	X	B	X	A	X	B	X	X	X	X	B	X	X	X	B	X	A	X	X	B	B	B	X	A	X	X	X	A	B	X	X	X	B	X
GM11:15608616	X	A	X	B	X	B	A	B	X	A	X	X	X	X	X	X	X	X	A	X	B	X	X	X	X	B	X	X	X	B	X	A	X	X	B	B	B	X	A	X	X	X	A	B	X	X	X	B	X
GM11:15678729	X	A	X	B	X	B	A	B	X	A	X	X	X	X	X	X	X	X	A	X	B	X	X	X	X	B	X	X	X	B	X	A	X	X	B	B	B	X	A	X	X	X	A	B	X	X	X	B	X
GM11:27633577	X	A	X	B	X	B	A	B	X	A	X	A	X	X	X	X	X	X	X	X	B	X	X	X	X	B	X	X	X	B	X	A	X	X	B	B	B	X	A	X	X	X	A	B	X	X	X	B	X
GM11:28156772	X	A	X	B	X	B	A	B	X	A	X	A	X	X	X	X	X	X	X	X	B	X	X	X	X	B	X	X	X	B	X	A	X	X	B	B	B	X	A	X	X	X	A	X	X	X	X	B	X
GM11:29300095	X	A	X	B	X	B	A	B	X	A	X	A	X	X	X	X	X	X	X	X	B	X	X	X	X	B	X	X	X	B	X	A	X	X	B	B	B	X	A	X	X	X	A	X	X	X	X	B	X
GM11:29541644	X	A	X	B	X	B	A	B	X	A	X	A	X	X	X	X	X	X	X	X	B	X	X	X	X	B	X	X	X	B	X	A	X	X	B	B	B	X	A	X	X	X	A	X	X	X	X	B	X
GM11:30969031	X	A	X	B	X	B	A	B	B	A	A	A	X	X	X	X	X	X	X	X	B	X	X	B	X	B	X	X	X	X	X	A	X	X	B	B	B	X	A	X	X	X	A	X	X	X	X	B	B
GM11:31202469	X	A	X	B	X	B	A	B	B	X	A	A	X	X	X	X	X	A	X	X	B	X	X	B	B	B	X	X	X	X	X	A	X	X	B	B	B	X	A	X	B	B	A	X	X	X	X	B	B
GM11:31650318	X	A	X	B	X	B	A	X	B	X	A	A	X	X	X	X	X	A	X	X	B	X	X	B	B	B	X	X	X	X	X	A	X	X	B	B	B	X	B	X	B	B	A	X	X	X	X	B	B
GM11:31815951	X	A	X	B	X	B	A	X	B	X	A	A	X	X	X	X	X	A	X	X	B	X	X	B	B	X	X	X	X	X	X	A	X	X	B	B	B	X	B	X	B	B	A	X	X	X	X	B	B
GM11:31816042	X	A	X	B	X	B	A	X	B	X	A	A	X	X	X	X	X	A	X	X	B	X	X	B	B	X	X	X	X	X	X	A	X	X	B	B	B	X	B	X	B	B	A	X	X	X	X	B	B
GM11:31828529	X	A	X	B	X	B	A	X	B	X	A	A	X	X	X	X	X	A	X	X	B	X	X	B	B	X	X	X	X	X	X	A	X	X	B	B	B	X	B	X	B	B	A	X	X	X	X	B	B
GM11:31893947	X	A	X	B	X	B	A	X	B	X	A	A	X	X	X	X	X	A	X	X	B	X	X	B	B	X	X	X	X	X	X	A	X	X	B	X	B	X	B	X	B	B	A	X	X	X	X	B	B
GM11:32351039	X	A	X	B	X	B	A	X	B	X	A	A	X	X	X	X	X	A	X	X	B	X	X	B	B	X	X	X	X	X	X	A	X	X	B	X	B	X	B	X	B	B	A	X	X	X	X	B	B
GM11:32377256	X	A	X	B	X	B	A	X	B	X	A	A	X	X	X	X	X	A	X	X	B	X	X	B	B	X	X	X	X	X	X	A	X	X	B	X	B	X	B	X	B	B	A	X	X	X	X	B	B
GM11:32763252	X	A	X	B	X	B	X	X	B	X	A	A	X	X	X	X	X	A	X	X	B	X	X	B	B	X	X	X	X	X	X	X	X	X	B	X	B	X	B	X	B	B	A	X	X	X	X	B	B
GM11:32783790	X	A	X	B	X	B	X	X	B	X	A	A	X	X	X	X	X	A	X	X	B	X	X	B	B	X	X	X	X	X	X	X	X	X	B	X	B	X	B	X	B	B	A	X	X	X	X	B	B
GM11:33176617	X	A	X	B	X	B	X	X	B	X	A	A	X	B	X	X	X	A	X	X	X	X	X	B	B	X	X	X	X	B	X	X	X	X	B	X	B	A	B	X	B	X	A	X	X	X	X	B	B
GM11:33258317	X	A	A	B	X	B	X	X	B	X	A	A	X	B	X	X	X	A	X	X	X	X	A	B	B	X	X	X	X	B	X	X	X	X	B	X	B	A	B	X	B	B	A	X	X	X	X	B	B
GM11:33429653	X	A	X	B	X	B	X	X	B	X	A	A	X	X	X	X	X	A	B	X	X	B	X	B	B	X	X	X	X	B	X	X	X	X	B	X	B	A	B	X	B	X	A	X	X	X	X	B	B
GM11:33571636	X	A	X	B	X	B	X	X	B	X	A	A	B	X	X	X	B	A	B	X	X	B	B	B	B	X	X	B	X	B	X	B	X	X	B	X	B	A	B	X	B	B	A	X	X	X	X	B	B
GM11:33581006	X	A	B	B	X	B	X	B	B	X	A	A	B	X	X	X	B	A	B	X	X	B	B	B	B	X	X	B	B	B	X	B	X	X	B	B	B	A	B	X	B	B	A	X	X	X	A	B	B
GM12:91611	B	X	X	X	A	B	B	X	A	A	X	A	X	B	B	A	A	B	A	B	X	X	X	X	B	A	X	X	X	B	A	B	B	B	A	A	B	A	B	X	X	B	X	A	B	X	X	A	X
GM12:116309	B	X	X	X	X	B	B	X	A	X	X	A	X	B	B	A	A	B	A	B	X	X	X	X	B	A	X	X	X	B	A	B	B	B	X	X	B	A	B	X	X	B	X	X	B	X	X	A	X
GM12:160184	B	X	X	X	X	B	B	X	A	X	X	A	X	B	B	A	A	B	A	B	X	X	X	X	B	A	X	X	X	B	A	X	B	B	X	X	B	A	B	X	X	B	X	X	B	X	X	A	X
GM12:169114	B	X	X	X	X	B	B	X	A	X	X	A	X	B	B	A	A	B	A	B	X	X	X	X	B	A	X	X	X	B	A	X	B	B	X	X	B	A	B	X	X	B	X	X	B	X	X	A	X
GM12:182011	B	X	X	X	X	B	B	X	A	X	X	A	X	B	B	A	A	B	A	B	X	X	X	X	B	A	X	X	X	B	A	X	B	B	X	X	B	A	B	X	X	B	X	X	B	X	X	A	X
GM12:190619	B	X	X	X	X	B	B	X	A	X	X	A	X	B	B	A	A	B	A	B	X	X	X	X	B	A	X	X	X	B	A	X	B	B	X	X	B	A	B	X	X	B	X	X	B	X	X	A	X
GM12:336218	B	X	X	X	X	B	B	X	A	X	X	A	X	B	B	A	A	B	A	B	X	X	X	X	B	A	X	X	X	B	A	X	B	B	X	X	B	A	B	X	X	B	X	X	B	X	X	A	X
GM12:341887	B	X	X	X	X	B	B	X	A	X	X	A	X	B	B	A	A	B	A	B	X	X	X	X	B	A	X	X	X	B	A	X	B	B	X	X	B	A	B	X	X	B	X	X	B	X	X	A	X
GM12:746022	B	X	X	X	X	B	B	X	A	X	X	A	X	B	B	A	A	B	A	B	X	X	X	X	B	A	X	X	X	B	A	X	B	B	X	X	B	A	B	X	X	B	X	X	B	X	X	A	X
GM12:850133	B	X	X	X	X	B	B	X	A	X	X	A	X	B	B	A	A	B	A	B	X	X	X	X	B	A	X	X	X	B	A	X	B	B	X	X	B	A	B	X	X	B	X	X	B	X	X	A	X
GM12:924424	B	X	X	X	X	B	B	X	A	X	X	A	X	B	B	A	A	B	A	B	X	B	X	X	B	A	X	X	X	B	A	X	B	B	X	X	B	A	B	X	X	B	X	X	B	X	X	A	X
GM12:1101236	B	X	X	X	X	B	B	X	A	X	X	A	X	B	B	A	A	B	A	B	X	B	X	X	B	A	X	X	X	B	A	X	B	B	X	X	B	A	B	X	X	B	X	X	B	X	X	A	X
GM12:1148005	B	X	X	X	X	B	B	X	A	X	X	A	X	B	B	A	A	B	A	B	X	B	X	X	B	A	X	X	X	B	A	X	B	B	X	X	B	A	B	X	X	B	X	X	B	X	X	A	X
GM12:1428945	B	A	X	X	X	B	B	X	A	X	X	A	X	B	B	A	A	B	A	B	X	B	X	X	B	A	X	X	X	B	A	X	B	B	X	X	B	A	B	X	A	B	X	X	B	X	X	A	X
GM12:1507259	B	A	X	X	X	B	B	X	A	X	X	A	X	B	B	A	A	B	A	B	X	B	X	X	B	A	X	X	X	B	A	X	B	B	X	X	B	A	B	X	A	B	X	X	B	X	X	A	X
GM12:1648102	B	A	X	X	X	B	B	X	A	X	X	A	X	B	B	A	A	B	A	B	X	B	X	X	B	A	X	X	X	B	A	X	B	B	X	X	B	A	B	X	A	B	X	X	B	X	X	A	X
GM12:2676105	X	A	X	X	X	B	B	X	A	X	X	A	X	B	B	X	A	B	A	B	X	B	X	X	B	A	A	X	X	B	A	X	B	B	X	X	B	A	B	X	A	B	X	X	B	X	B	A	X
GM12:2677245	X	A	X	X	X	B	B	X	A	X	X	A	X	B	B	X	A	B	A	B	X	B	X	X	B	A	A	X	X	B	A	X	B	B	X	X	B	A	B	X	A	B	X	X	B	X	B	A	X
GM12:2677409	X	A	X	X	X	B	B	X	A	X	X	A	X	B	B	X	A	B	A	B	X	B	X	X	B	A	A	X	X	B	A	X	B	B	X	X	B	A	B	X	A	B	X	X	B	X	B	A	X
GM12:2688539	X	A	X	X	X	B	B	X	A	X	X	A	X	B	B	X	A	B	A	B	X	B	X	X	B	A	A	X	X	B	A	X	B	B	X	X	B	A	B	X	A	B	X	X	B	X	B	A	X
GM12:2819616	X	A	X	X	X	B	B	X	A	X	X	A	X	B	B	X	A	B	A	B	X	B	X	X	B	A	A	X	X	B	A	X	B	B	X	X	B	A	B	X	A	B	X	X	B	X	B	A	X
GM12:2974067	X	A	X	X	X	B	B	X	A	X	X	A	X	B	B	X	A	B	A	B	X	B	X	X	B	A	A	X	X	B	A	X	B	B	X	X	B	A	B	X	A	B	X	X	B	X	B	A	X
GM12:3324328	X	A	X	X	X	B	B	X	A	X	X	A	X	B	B	X	A	B	A	B	X	B	X	X	B	A	A	X	X	B	A	X	B	B	X	X	B	A	B	X	A	X	X	X	B	X	B	A	X
GM12:3388472	X	A	X	X	X	B	B	X	A	X	X	A	X	B	B	X	A	B	A	B	X	B	X	X	B	A	A	X	X	B	A	X	B	B	X	X	B	A	A	X	A	X	X	X	B	X	B	A	X
GM12:3391462	X	A	X	X	X	B	B	X	A	X	X	A	X	B	B	X	A	B	A	B	X	B	X	A	B	A	A	X	X	B	A	X	B	B	X	X	B	A	A	X	A	X	X	X	B	X	B	A	X
GM12:3391590	X	A	X	X	X	B	B	X	A	X	X	A	X	B	B	X	A	B	A	B	X	B	X	A	B	A	A	X	X	B	A	X	B	B	X	X	B	A	A	X	A	X	X	X	B	X	B	A	X
GM12:3666689	X	A	X	X	X	B	B	X	A	A	X	A	X	X	X	X	A	B	A	B	X	B	X	X	B	A	A	X	X	B	A	X	B	B	X	X	B	A	A	X	A	X	X	X	X	X	B	A	X
GM12:4036045	X	A	X	X	X	B	B	X	A	A	X	A	X	X	X	X	A	B	B	A	X	B	X	X	B	A	X	X	X	B	A	X	B	B	X	X	B	A	A	X	A	X	X	X	X	X	B	A	X
GM12:6446818	X	A	X	X	X	B	B	X	X	A	X	A	X	X	X	B	A	B	B	A	X	B	X	A	B	A	X	X	X	X	A	X	A	B	X	X	X	A	A	B	A	B	X	X	X	X	X	A	X
GM12:6478299	X	A	X	A	A	B	B	X	X	A	X	A	X	X	X	B	A	B	B	A	X	B	X	A	A	A	X	X	X	X	A	X	A	B	X	A	X	A	A	B	B	B	X	X	X	X	X	A	X
GM12:7358992	X	A	X	A	A	X	B	A	X	A	X	A	X	X	X	B	A	X	B	A	X	B	X	A	A	A	X	X	X	X	A	X	A	B	X	A	X	A	A	B	B	B	A	X	X	X	X	A	X
GM12:8010449	X	A	X	A	A	X	B	A	X	A	X	A	X	X	X	B	A	X	B	A	X	B	X	A	A	A	X	X	B	X	A	X	A	B	X	A	X	A	A	B	B	B	A	A	X	X	X	A	X
GM12:8014167	X	A	X	A	A	X	B	A	X	A	X	A	X	X	X	B	A	X	B	A	X	B	X	A	A	A	X	X	B	X	A	X	A	B	X	A	X	A	A	B	B	B	A	A	X	X	X	A	X
GM12:8014367	X	A	X	A	A	X	B	A	X	A	X	A	X	X	X	B	A	X	B	A	X	B	X	A	A	A	X	X	B	X	A	X	A	B	X	A	X	A	A	B	B	B	A	A	X	X	X	B	X
GM12:8050159	X	A	X	A	A	X	B	A	X	A	X	A	X	X	X	B	A	X	B	A	X	B	X	A	A	A	X	X	B	X	A	X	A	B	X	A	X	B	A	B	B	B	A	A	X	X	X	B	X
GM12:8518559	X	X	X	A	A	X	B	A	X	A	X	A	X	X	X	B	A	X	B	A	X	B	X	A	A	A	X	X	B	X	A	X	A	B	X	A	X	B	A	B	B	B	A	A	X	X	X	B	X
GM12:9094142	X	X	X	A	A	X	B	A	X	A	X	A	X	X	X	B	B	X	B	A	B	B	X	B	A	A	X	X	B	X	A	X	A	B	X	A	X	B	A	B	B	B	A	A	X	X	X	B	X
GM12:9144133	X	X	X	A	A	X	B	A	X	A	X	A	X	X	X	B	B	X	B	A	B	B	X	B	A	A	X	X	B	X	A	X	A	B	X	A	X	B	A	B	B	B	A	A	X	X	X	B	X
GM12:9543049	X	X	X	A	A	X	B	A	X	A	X	X	X	X	X	B	B	X	B	A	B	B	X	B	A	A	X	A	B	X	A	X	A	B	X	A	X	B	A	B	X	B	A	A	B	X	X	B	X
GM12:9665272	X	X	X	A	A	X	B	A	X	A	X	X	X	X	X	B	B	X	B	A	B	B	X	B	A	A	X	A	B	X	A	X	A	B	X	A	X	B	A	B	X	B	A	A	B	X	X	B	X
GM12:9754544	X	X	X	A	A	X	B	A	X	A	X	X	A	X	X	B	B	X	B	A	B	B	X	B	A	A	X	A	B	X	A	X	A	B	X	A	X	B	A	B	X	B	A	A	B	X	X	B	X
GM12:9754689	X	X	X	A	A	X	B	A	X	A	X	X	A	X	X	B	B	X	B	A	B	B	X	B	A	A	X	A	B	X	A	X	A	B	X	A	X	B	A	B	X	B	A	X	B	X	X	B	X
GM12:14515603	X	X	X	A	A	X	B	A	X	A	X	X	A	X	X	X	B	B	X	A	B	B	X	B	A	A	X	A	B	X	X	X	A	B	X	A	X	B	A	B	X	B	X	X	B	X	X	B	X
GM12:14546889	X	X	X	A	A	X	B	A	X	A	X	X	A	X	X	X	B	B	X	A	B	B	X	B	A	A	X	X	B	X	X	X	A	B	X	A	X	B	A	B	X	B	X	X	B	X	X	B	X
GM12:14546990	X	X	X	A	A	X	B	A	X	A	X	X	A	X	X	X	B	B	X	A	B	B	X	B	A	A	A	X	B	X	X	X	A	B	X	A	X	B	A	B	X	B	X	X	B	X	X	B	X
GM12:15233836	X	X	X	A	A	X	B	A	X	A	X	X	A	X	X	X	B	B	X	A	B	B	X	B	A	A	A	X	B	X	X	X	A	B	X	A	X	B	A	B	X	B	X	X	B	X	X	B	X
GM12:15431876	X	X	X	A	A	X	B	A	X	A	X	X	A	X	X	X	B	B	X	A	B	B	X	B	A	A	A	X	B	X	X	X	A	B	X	A	X	B	A	B	X	B	X	X	B	X	X	B	X
GM12:15571035	X	X	X	A	A	X	B	A	X	A	X	X	A	X	X	X	B	B	X	A	B	B	X	B	A	A	A	X	B	X	X	X	A	B	X	A	X	B	A	B	X	B	X	X	B	X	X	B	X
GM12:16108975	X	X	X	A	A	X	B	A	X	A	X	X	A	X	X	X	B	B	X	A	B	B	X	B	A	A	A	X	B	X	X	X	A	B	X	A	X	B	A	B	X	B	X	X	B	X	X	B	X
GM12:16402212	X	X	X	A	A	X	B	A	X	A	X	X	A	X	X	X	B	B	X	A	B	B	X	B	A	A	A	X	B	X	X	X	A	B	X	A	X	B	A	B	X	B	X	X	B	X	X	B	X
GM12:16686930	X	X	X	A	A	X	B	A	X	A	X	X	A	X	X	X	B	B	X	A	B	B	X	B	A	A	A	X	B	X	X	X	A	B	X	A	X	B	A	B	X	B	X	X	B	X	X	B	X
GM12:23038546	X	X	X	A	A	X	B	A	X	A	X	X	A	X	X	X	B	B	X	A	B	B	X	B	A	A	A	X	B	X	X	X	A	B	X	A	X	B	A	B	X	B	X	X	B	X	X	B	X
GM12:26635077	X	X	X	A	A	X	B	A	X	A	X	X	A	X	X	X	B	B	X	A	B	B	X	B	A	A	A	X	B	X	X	X	A	B	X	A	X	B	A	B	X	B	X	X	B	X	X	B	X
GM12:32204397	X	X	X	A	A	X	B	A	X	A	X	X	A	X	X	X	B	B	X	A	B	B	X	B	A	X	A	X	B	X	X	X	A	B	X	A	X	B	A	B	X	B	X	X	B	X	X	B	X
GM12:32290805	X	X	X	A	A	X	B	A	X	A	X	X	A	X	X	X	B	B	X	A	B	B	X	B	A	X	A	X	B	X	X	A	A	B	X	A	X	B	A	B	X	B	X	X	B	X	X	B	X
GM12:32356980	X	X	X	A	A	X	B	A	X	A	X	X	A	X	X	X	B	B	X	A	B	B	X	B	A	X	A	X	B	X	X	A	A	B	X	A	X	B	A	B	X	B	X	X	B	X	X	B	X
GM12:32496173	X	X	X	A	A	X	B	A	X	A	X	X	A	X	X	X	B	B	X	A	B	B	X	B	A	X	A	X	B	X	X	A	A	B	X	A	X	B	A	B	X	B	X	X	B	X	X	B	X
GM12:32579389	X	X	X	A	A	X	B	A	X	A	X	X	A	X	X	X	B	B	X	A	B	B	X	B	A	X	A	X	B	X	X	A	A	B	X	A	X	B	A	B	X	B	X	X	B	X	X	B	X
GM12:32893243	X	X	X	A	A	X	B	A	X	A	X	X	A	X	A	X	B	B	X	A	B	X	X	B	A	X	A	X	B	X	X	A	A	B	X	A	X	B	A	B	X	B	X	X	B	X	X	B	X
GM12:33012810	X	X	X	A	A	X	B	A	X	A	X	X	A	X	A	X	B	B	X	A	B	X	X	B	A	X	A	X	B	X	A	A	A	B	X	A	X	B	A	B	X	B	X	X	B	X	X	B	X
GM12:33078239	X	X	X	A	A	X	B	A	X	A	X	X	X	X	A	X	B	B	X	A	B	X	X	B	A	X	A	X	B	X	A	A	A	B	X	A	X	B	A	B	X	X	X	X	B	X	X	B	X
GM12:33249488	X	X	X	A	A	X	B	B	X	A	X	X	X	X	A	X	B	B	X	A	B	X	X	B	A	X	A	X	B	X	A	A	A	B	X	A	X	B	A	B	X	X	X	X	B	X	X	B	X
GM12:33457196	X	X	X	A	A	X	B	B	X	A	X	X	X	A	A	X	X	B	X	A	B	X	X	B	A	X	A	X	B	X	A	A	A	B	X	A	X	B	A	B	X	X	X	X	B	X	X	B	X
GM12:33494536	X	X	X	A	A	X	B	B	X	A	X	X	X	A	A	X	X	B	X	A	B	X	X	B	A	X	A	X	B	X	A	A	A	B	X	A	X	B	A	B	X	X	X	X	B	X	X	B	X
GM12:33521414	X	X	X	B	A	X	B	B	X	A	X	X	X	A	A	X	X	B	X	A	B	X	X	B	A	X	A	X	B	X	A	A	A	B	X	A	X	B	A	B	X	X	X	X	B	X	X	B	X
GM12:33539936	X	X	X	B	A	X	B	B	X	A	X	X	X	A	A	X	X	B	X	A	B	X	X	B	A	X	A	X	B	X	A	A	A	B	X	A	X	B	A	B	X	X	X	X	B	X	X	B	X
GM12:33619560	X	X	X	B	A	X	B	B	X	A	X	X	X	A	A	X	X	B	X	X	B	X	X	B	A	X	A	X	B	X	A	A	A	A	X	A	X	B	X	A	X	X	X	X	B	X	X	A	X
GM12:36431472	X	X	A	B	A	X	B	B	X	A	X	B	X	A	A	X	X	X	B	X	B	X	X	X	A	B	A	X	X	X	A	A	A	A	A	B	B	X	X	A	X	X	X	X	A	X	X	A	X
GM12:36456461	X	A	A	B	A	X	B	B	X	A	A	B	X	A	A	X	X	X	B	X	B	X	X	X	A	B	A	A	X	X	A	A	A	A	A	B	B	X	X	A	X	X	X	A	A	X	X	A	X
GM12:36465953	X	A	A	B	A	X	B	B	X	A	A	B	X	A	A	X	X	X	B	X	B	X	X	X	A	B	A	A	X	X	A	A	A	A	A	B	B	X	X	A	X	X	X	A	A	X	X	A	X
GM12:36495998	X	A	A	B	A	X	B	B	X	A	A	B	X	A	A	X	X	X	B	X	B	X	X	X	A	B	A	A	X	X	A	A	A	A	A	B	B	X	X	A	X	X	X	A	A	X	X	A	X
GM12:36536006	X	A	A	B	A	X	B	B	X	A	A	B	X	X	A	X	X	X	B	X	B	X	X	X	A	B	A	A	X	X	A	A	A	A	A	B	B	X	X	A	X	X	X	A	A	X	X	A	X
GM12:36736475	X	A	A	B	A	X	B	B	X	A	A	B	X	X	A	X	X	X	B	X	B	X	X	X	A	B	A	A	X	X	A	A	A	A	A	B	B	X	X	A	X	B	X	A	A	B	X	A	B
GM12:36928914	X	A	A	B	A	X	B	B	X	A	A	B	X	X	A	X	X	X	B	X	B	X	X	X	A	B	A	A	X	X	A	A	A	A	A	B	B	X	X	A	X	B	X	A	A	B	X	A	B
GM12:37132484	X	A	A	B	A	X	B	B	X	A	A	B	X	X	A	X	X	X	B	X	B	X	X	X	A	B	A	A	X	X	A	A	A	A	A	B	B	X	X	A	X	B	X	A	A	B	X	A	B
GM12:37176340	X	A	A	B	A	X	B	B	X	A	A	B	X	X	A	X	X	X	B	X	B	X	X	X	A	B	A	A	X	X	A	A	A	A	A	B	B	X	X	A	X	B	X	A	A	B	X	A	B
GM12:37671005	X	A	A	B	A	X	B	B	X	A	A	B	A	X	A	A	X	X	B	X	B	X	A	X	A	B	A	A	X	X	A	A	A	A	A	B	B	X	X	A	X	B	X	A	A	B	X	A	B
GM12:37928472	X	A	A	B	A	A	X	B	X	A	A	B	A	X	A	A	X	X	B	X	B	X	A	X	A	B	A	A	X	X	A	A	A	A	A	B	B	X	X	A	X	B	X	A	A	B	X	A	B
GM12:37967374	X	A	A	B	A	A	X	B	X	A	A	B	A	X	A	A	X	X	B	X	B	X	A	X	A	B	A	A	X	X	A	A	A	A	A	B	B	X	X	A	X	B	X	A	A	B	X	A	B
GM12:38019871	X	A	A	B	A	A	X	B	X	A	A	B	A	X	A	A	X	X	B	X	B	X	X	X	A	B	A	A	X	A	A	A	A	A	A	B	B	X	X	A	X	B	X	A	A	B	X	A	B
GM12:38179502	X	A	A	B	A	A	X	B	X	A	A	B	A	X	A	A	X	X	B	X	B	X	X	X	A	B	A	A	X	X	A	A	A	A	A	B	B	X	X	A	X	B	X	A	A	B	X	A	B
GM12:38319250	X	A	A	B	A	A	X	B	X	A	A	B	A	X	A	A	X	X	B	X	B	X	X	X	A	B	A	A	X	X	A	A	A	A	A	B	B	X	X	A	X	B	X	A	A	B	X	A	B
GM13:8769090	X	X	B	B	A	B	A	X	X	A	B	A	X	B	A	X	X	A	B	X	X	B	X	A	X	B	A	X	B	A	A	X	B	B	X	B	X	X	A	B	B	A	B	A	X	A	X	A	X
GM13:9871736	A	X	B	B	A	B	A	X	X	A	B	A	X	B	A	B	X	A	B	X	X	B	X	A	X	B	A	X	B	A	A	X	B	B	X	B	B	X	A	B	B	A	B	A	X	A	X	A	X
GM13:13731743	X	A	A	X	X	B	X	X	X	B	B	A	X	B	A	X	X	A	B	X	X	B	X	A	X	X	A	X	X	A	A	X	B	X	X	B	A	A	A	B	B	A	X	A	X	A	X	A	X
GM13:13826030	X	A	A	X	X	B	X	X	X	B	B	A	X	B	A	X	X	A	B	X	X	B	X	A	X	X	A	X	X	A	A	X	B	X	X	B	A	A	A	B	B	A	X	A	X	A	X	A	X
GM13:13826202	X	A	A	X	X	B	X	X	X	B	B	A	X	B	A	B	X	A	B	X	X	B	X	A	X	X	A	X	X	A	A	X	B	X	X	B	A	A	A	B	B	A	X	A	X	A	X	A	X
GM13:13850933	X	A	A	X	X	B	A	X	X	X	B	A	X	B	A	X	X	A	B	X	X	B	X	A	X	X	A	X	X	A	A	X	B	X	X	B	A	A	A	B	B	A	X	A	X	A	X	A	X
GM13:14188957	X	A	A	X	X	B	A	X	X	B	B	A	X	X	A	X	X	A	B	X	X	B	X	A	X	X	A	X	X	A	A	X	B	X	X	B	A	A	A	B	B	A	X	A	X	A	X	A	X
GM13:14470635	X	A	A	X	X	B	A	X	X	B	B	A	X	X	A	X	X	A	B	X	X	B	X	A	X	X	A	X	X	A	A	X	B	X	X	B	A	A	A	B	B	A	X	A	X	A	X	A	X
GM13:14536814	X	A	A	X	X	B	A	X	X	B	B	A	X	X	A	X	X	A	B	X	X	B	X	A	X	X	A	X	X	A	A	X	B	X	X	B	A	A	A	B	B	A	X	A	X	A	X	A	X
GM13:14720063	X	A	A	X	X	B	A	X	X	B	B	A	X	X	A	X	X	X	B	X	X	B	X	A	X	X	A	X	X	A	A	X	B	X	X	B	A	A	A	B	B	A	X	A	X	A	X	A	X
GM13:14861228	X	A	A	X	X	B	A	X	X	B	B	A	X	X	A	X	X	X	B	X	X	B	X	A	X	X	A	X	X	A	A	X	B	X	X	B	A	A	A	B	B	A	X	A	X	A	X	A	X
GM13:27504780	X	B	A	B	X	X	X	X	X	X	B	B	X	X	B	B	X	X	B	X	B	B	X	B	B	B	B	X	X	B	X	X	B	X	X	A	B	X	X	A	X	A	X	X	X	B	X	A	X
GM13:27566536	X	B	A	B	X	X	X	X	X	X	B	B	X	X	B	B	A	X	B	X	B	B	X	B	B	B	B	X	A	B	X	X	B	X	X	A	B	X	X	A	X	A	X	X	X	B	X	A	X
GM13:27594531	X	B	A	B	X	X	X	X	A	X	B	B	X	X	B	B	A	X	B	X	B	B	X	B	B	B	B	X	A	B	X	X	B	X	X	A	B	X	X	A	X	A	X	X	X	B	X	A	X
GM13:27887987	X	B	A	B	X	X	X	X	A	X	B	B	X	X	B	B	A	X	B	X	B	B	X	B	B	B	B	X	A	B	X	X	B	X	X	A	B	X	X	A	X	A	X	X	X	B	X	A	X
GM13:28117721	X	B	A	B	X	X	X	X	A	X	B	B	X	X	B	B	A	X	B	X	B	B	X	B	B	B	B	X	A	B	X	X	B	X	X	A	B	X	X	A	X	A	X	X	X	B	X	A	X
GM13:28761107	X	B	A	B	X	X	X	X	A	X	B	B	X	X	X	B	X	X	B	X	B	B	X	B	B	B	B	B	A	X	X	X	B	X	A	A	B	X	X	A	X	A	X	X	X	B	X	A	X
GM13:28842184	X	B	A	B	X	X	X	X	A	X	B	B	X	X	X	B	X	X	B	X	B	B	X	B	B	B	B	B	A	X	X	X	B	X	A	A	B	X	X	A	X	A	X	X	X	B	X	A	X
GM13:28853919	X	B	A	B	X	X	X	X	A	X	B	B	X	X	X	B	X	X	B	X	B	B	X	B	B	B	B	B	A	X	X	X	B	X	A	A	B	X	X	A	X	A	X	X	X	B	X	A	X
GM13:29395603	X	X	A	B	X	X	X	X	A	X	B	B	X	X	X	B	X	X	B	B	B	B	X	B	B	B	B	B	A	X	X	X	B	X	A	A	X	X	X	A	X	A	X	X	X	B	X	A	X
GM13:29583916	X	X	A	B	X	X	X	X	A	X	B	B	X	X	X	B	X	X	B	B	B	B	X	B	B	B	B	B	A	X	X	X	B	X	A	A	X	X	X	A	X	A	X	X	X	B	X	A	X
GM13:29649544	X	X	A	B	X	X	X	X	A	X	B	B	X	X	X	B	X	X	B	B	B	B	X	B	B	B	B	B	A	X	X	X	B	X	A	A	X	X	X	A	X	A	X	X	X	B	X	A	X
GM13:29741447	X	X	A	B	X	X	X	X	A	X	B	B	X	X	X	B	X	X	B	B	B	B	X	B	B	B	B	B	A	X	X	X	B	X	A	A	X	X	X	A	X	A	X	X	X	B	X	A	X
GM13:30407202	X	X	A	B	X	X	X	X	A	B	B	B	X	X	X	B	X	X	B	B	B	B	X	B	B	B	B	B	A	X	X	X	B	X	A	A	X	X	X	A	X	A	X	X	X	B	X	A	X
GM13:30594652	X	X	A	B	X	X	X	X	A	B	B	B	X	X	X	B	X	X	B	B	B	B	X	B	B	B	X	B	A	X	X	X	B	X	A	A	X	X	X	A	X	A	X	X	X	B	X	A	X
GM13:30866738	X	X	A	B	X	X	X	X	A	B	B	B	X	X	X	B	X	X	B	B	B	B	X	B	B	B	X	B	A	X	X	X	B	X	A	A	X	X	X	A	X	A	X	X	X	B	X	A	X
GM13:31305291	X	X	A	B	X	X	X	X	A	B	B	B	X	X	X	B	X	X	B	B	B	B	X	B	B	B	X	B	A	X	X	X	B	X	A	A	X	X	X	A	X	A	X	X	X	B	X	A	X
GM13:31531539	X	X	A	B	X	X	X	X	A	B	B	B	X	X	X	B	X	X	B	B	B	B	X	B	B	B	X	B	X	X	X	X	B	X	A	A	X	X	X	A	X	A	X	X	X	B	X	A	X
GM13:31531708	X	X	A	B	X	X	X	X	A	B	B	B	X	X	X	B	X	X	B	B	B	B	X	B	B	B	X	B	X	X	X	X	B	X	A	A	X	X	X	A	X	A	X	X	X	B	X	A	X
GM13:31848689	X	X	A	B	X	X	X	X	A	B	B	B	X	X	X	B	X	A	B	B	B	B	X	B	B	B	X	B	X	X	X	X	B	X	A	A	X	X	X	A	X	A	X	X	X	B	X	A	X
GM13:32418503	X	X	A	B	X	X	X	X	A	B	B	B	X	X	X	B	X	A	B	B	B	B	X	B	B	B	X	B	X	X	X	X	B	X	A	A	X	B	X	A	X	A	X	X	X	B	X	A	X
GM13:32432817	X	X	A	B	X	X	X	X	A	B	B	B	X	X	X	B	X	A	B	B	B	B	X	B	B	B	X	B	X	X	X	X	B	X	A	A	X	B	X	A	A	A	X	X	X	B	X	A	X
GM13:32577652	X	X	A	B	X	X	X	X	A	B	B	B	X	X	X	B	X	A	B	B	B	B	X	B	B	B	X	B	X	X	X	X	B	X	A	A	X	B	X	A	A	A	X	X	X	B	X	A	X
GM13:32863488	X	X	A	B	X	X	X	X	A	B	B	B	X	X	X	B	X	A	B	B	B	B	X	B	B	B	X	B	X	X	X	X	B	X	A	A	X	B	X	A	A	A	X	X	X	B	X	A	X
GM13:33372048	X	X	A	B	X	X	X	X	A	B	B	B	X	B	X	B	X	A	B	B	B	B	X	B	B	B	X	B	X	X	X	X	B	X	A	A	X	B	X	A	A	A	X	X	X	B	X	A	X
GM13:33719549	X	X	A	B	X	X	X	X	A	B	B	B	X	B	X	B	X	A	B	B	B	B	X	B	B	B	X	B	X	A	X	X	B	X	A	A	X	B	B	A	A	A	X	X	X	B	X	A	X
GM13:33810813	X	X	A	B	X	X	X	X	A	B	B	B	X	B	X	B	X	A	B	B	B	B	X	B	A	B	X	B	X	A	X	X	B	X	A	A	X	B	B	A	A	A	X	X	X	B	X	A	X
GM13:33814774	X	X	A	B	X	X	X	X	A	B	B	B	X	B	X	B	X	A	B	B	B	B	X	B	A	B	X	B	X	A	X	X	B	X	A	A	X	B	B	A	A	A	X	X	X	B	X	A	X
GM13:38604376	X	X	X	B	X	A	X	X	X	B	B	B	X	X	X	B	X	A	B	B	X	B	X	B	A	X	X	B	X	A	A	X	X	X	A	X	X	X	B	A	X	X	X	B	X	B	X	X	B
GM13:38620690	X	X	X	B	X	A	A	X	X	B	B	B	X	X	X	B	X	A	B	B	X	B	X	B	A	X	X	B	X	A	A	X	X	X	A	X	X	X	B	A	X	X	X	B	X	B	X	X	B
GM13:38627374	X	X	X	B	X	A	A	X	X	B	B	B	X	X	X	B	X	A	A	B	X	B	X	B	A	X	X	B	X	A	A	X	X	X	A	X	X	X	B	A	X	X	X	B	X	B	X	X	B
GM13:38686988	X	X	X	B	X	A	A	X	X	B	B	A	X	X	X	B	X	A	A	B	X	B	X	B	A	X	X	B	X	A	A	X	X	X	A	X	X	X	B	A	X	X	X	B	X	B	X	X	B
GM13:39169360	A	X	X	B	X	A	A	X	X	B	B	A	X	X	X	B	X	A	A	A	X	B	X	B	A	X	X	B	X	A	A	X	X	X	A	X	X	X	B	A	X	X	X	B	X	B	X	X	B
GM13:41110776	A	X	X	B	X	A	A	X	X	B	B	A	X	X	X	B	X	A	A	A	X	B	X	B	A	X	X	A	X	A	A	X	X	X	A	X	X	X	B	A	X	X	X	B	X	B	X	X	B
GM13:41120172	A	X	X	A	X	A	A	X	X	B	B	A	X	X	X	B	X	A	A	A	X	B	X	B	A	X	X	A	X	A	A	X	X	X	A	X	X	X	B	A	X	X	X	B	X	B	X	X	B
GM13:44141647	A	B	X	A	X	A	A	X	X	B	B	A	A	X	X	B	X	A	A	A	X	B	X	B	A	X	X	A	X	A	A	X	X	X	A	X	X	X	B	A	X	X	X	B	X	B	X	X	B
GM13:44305702	A	B	X	A	X	A	A	X	X	B	B	A	A	X	X	B	X	A	A	A	X	B	A	B	A	X	X	A	X	A	A	X	X	A	A	X	X	X	B	A	X	X	X	B	X	B	X	X	B
GM13:44401257	A	B	X	A	X	A	A	X	X	B	B	A	A	X	X	B	X	A	A	A	X	B	A	B	A	X	X	A	X	A	A	X	X	A	A	X	X	X	B	A	X	X	X	B	X	B	X	X	B
GM13:44431067	A	B	X	A	X	A	A	X	X	B	B	A	A	X	X	A	X	A	A	A	X	B	A	B	A	X	X	A	X	A	A	X	X	A	A	X	X	X	B	A	X	X	X	B	X	B	X	X	B
GM13:44530793	A	B	X	A	X	A	A	X	X	B	B	A	A	X	X	A	X	A	A	A	X	B	A	B	A	X	X	A	X	A	A	X	X	A	X	X	X	X	B	A	X	X	X	B	X	B	X	X	B
GM13:44636829	A	B	X	A	X	A	A	X	X	B	B	A	A	X	X	A	X	A	A	A	X	B	A	B	A	X	X	A	X	A	A	A	X	A	X	X	X	X	B	A	X	X	X	B	X	B	X	X	B
GM13:44657287	A	B	X	X	X	A	A	A	A	B	B	A	B	X	A	X	B	X	A	A	X	B	A	B	A	X	X	X	X	A	X	A	X	A	X	X	X	X	X	A	X	X	X	B	X	B	X	X	B
GM13:44748437	A	B	X	X	X	A	A	A	A	B	B	A	X	X	A	A	B	X	A	A	A	B	A	B	A	X	X	A	X	A	X	A	X	A	B	X	X	X	X	A	X	X	A	B	A	B	B	X	B
GM13:44774167	A	B	X	X	X	A	A	A	X	B	B	A	X	X	X	A	B	X	A	A	X	B	A	B	A	X	X	X	A	A	X	A	X	A	X	X	X	X	X	A	X	X	X	B	X	B	X	X	B
GM13:45465623	A	B	X	X	X	A	A	X	X	B	B	A	X	X	X	X	B	X	A	A	X	B	X	B	A	X	X	X	X	A	B	A	X	A	X	X	X	X	B	A	X	X	A	B	A	B	X	X	B
GM13:45541114	A	B	X	X	B	A	A	B	X	B	B	A	X	X	X	X	B	X	A	A	X	B	X	B	A	X	X	X	X	A	B	A	X	A	X	B	X	X	B	A	X	A	A	B	A	B	X	X	B
GM14:476768	X	A	X	X	A	X	B	X	X	B	A	X	A	B	A	B	A	A	X	X	X	B	B	X	X	A	X	B	A	X	B	A	B	B	A	A	B	X	A	X	A	X	A	X	X	X	X	X	X
GM14:642128	X	A	X	X	A	X	B	X	B	B	A	X	A	X	A	B	A	A	A	A	X	B	B	X	A	A	X	B	A	B	B	A	B	B	A	A	B	A	A	X	A	X	A	X	B	B	B	X	X
GM14:920566	X	A	X	X	A	X	B	X	X	B	A	X	X	B	A	B	A	A	X	X	X	B	B	X	X	A	X	B	A	X	B	A	B	B	A	A	B	X	A	X	A	X	A	X	X	B	B	X	X
GM14:950893	X	A	X	X	A	X	B	X	A	B	A	X	X	B	A	B	A	A	X	X	X	B	B	A	X	A	X	B	A	X	B	A	B	B	A	A	B	X	A	X	A	X	A	A	A	B	B	B	A
GM14:955581	X	A	X	X	A	X	B	A	X	B	A	X	X	B	A	B	A	A	X	X	X	B	B	X	X	A	X	B	A	X	B	A	B	B	A	A	B	X	A	X	A	X	A	X	X	B	B	X	X
GM14:956017	X	A	X	X	A	X	B	X	X	B	A	X	X	B	A	B	A	A	X	A	X	B	B	B	X	A	X	B	A	X	B	A	B	B	A	A	B	X	A	X	A	X	A	X	X	B	B	X	A
GM14:1058426	X	A	X	X	A	X	B	X	X	B	A	X	X	B	A	B	A	A	X	A	X	B	B	B	X	A	X	B	A	X	B	A	B	B	A	A	B	X	A	X	A	X	A	X	X	B	B	X	A
GM14:1086306	X	A	X	X	A	X	B	X	X	B	A	X	X	B	A	B	A	A	X	B	X	B	B	B	X	A	X	B	A	X	B	A	B	B	A	A	B	X	A	X	A	X	A	X	X	B	B	X	A
GM14:1230726	X	A	X	X	A	X	B	X	X	B	A	X	X	B	A	B	A	X	X	B	X	B	B	B	X	A	X	B	A	X	B	A	B	B	A	A	B	X	A	X	A	X	A	X	X	B	B	X	A
GM14:1595372	X	A	X	X	A	X	B	X	X	B	A	X	X	B	A	B	X	X	X	B	X	B	B	B	X	A	X	B	A	X	B	A	B	B	A	A	B	X	A	X	A	X	A	X	X	B	B	X	A
GM14:1625474	X	A	X	X	A	X	B	X	X	B	A	X	X	B	A	B	X	X	X	B	X	B	B	B	X	X	X	B	A	X	B	A	B	B	A	A	B	X	A	X	A	X	A	X	X	B	B	X	A
GM14:1795219	X	A	X	X	A	X	B	X	X	B	A	X	X	B	A	B	X	X	X	B	X	B	B	B	X	X	X	B	A	X	B	A	B	B	A	A	B	X	A	X	A	X	A	X	X	B	B	X	A
GM14:1797182	X	A	X	X	A	X	B	X	X	B	A	X	X	B	A	B	X	X	X	B	X	B	B	B	X	X	X	B	A	X	B	A	B	B	A	A	B	X	A	X	A	X	A	X	X	B	B	X	A
GM14:1850964	X	A	X	X	A	X	B	X	X	B	A	X	X	B	A	B	X	X	X	B	X	B	B	B	X	X	X	B	A	X	B	A	B	B	A	A	B	X	A	X	A	X	A	X	X	B	B	X	A
GM14:2222718	X	A	X	X	A	X	B	X	X	B	A	X	X	B	A	B	X	X	X	B	X	B	B	B	X	X	X	B	A	X	B	A	B	B	A	A	B	X	A	X	A	X	A	X	X	B	B	B	A
GM14:2259506	X	A	X	X	A	X	B	X	X	B	A	X	X	B	X	B	X	X	X	B	X	B	B	B	X	X	X	B	A	X	B	A	B	B	A	A	B	X	A	X	X	X	A	X	X	B	B	B	A
GM14:2757199	X	A	X	X	A	X	B	X	X	B	A	X	X	B	X	B	X	X	X	B	B	B	B	B	A	X	X	B	A	X	B	A	B	B	A	A	X	X	A	X	X	X	A	X	X	B	B	B	A
GM14:2853858	X	A	X	X	A	X	B	X	X	B	A	X	X	B	X	B	X	X	X	B	B	B	B	B	A	X	X	B	A	X	B	A	B	B	A	A	X	X	A	X	X	X	A	X	B	B	B	B	A
GM14:3041424	X	A	X	X	A	X	B	X	X	B	A	X	X	B	X	B	X	X	X	B	B	B	B	B	A	X	X	B	A	X	B	A	B	B	A	A	X	X	A	X	X	X	A	X	B	B	B	B	A
GM14:3094471	X	A	X	X	A	X	B	X	X	B	A	X	X	B	X	B	X	X	X	B	B	B	B	B	A	X	X	B	A	X	B	A	B	B	A	A	X	X	A	X	X	X	A	X	B	B	B	B	A
GM14:3441904	X	A	X	X	A	X	B	X	X	B	A	X	X	B	X	B	X	X	X	B	B	B	B	B	A	X	X	B	A	X	B	A	B	B	A	A	X	X	A	X	X	X	A	X	B	B	B	B	A
GM14:3472413	X	A	X	X	A	X	B	X	X	B	A	X	X	B	X	B	X	X	X	B	B	B	B	B	A	X	X	B	A	X	B	A	B	B	A	A	X	X	A	X	X	X	A	X	B	B	B	B	A
GM14:3546556	X	A	X	X	A	X	B	X	X	B	A	X	X	B	X	B	X	X	X	B	B	B	B	B	A	X	X	B	A	X	B	A	B	B	A	A	X	X	A	X	X	X	A	X	B	B	B	B	A
GM14:3557612	X	A	X	X	A	X	B	X	X	B	A	X	X	B	X	B	X	X	X	B	B	B	B	B	A	X	X	B	A	X	B	A	B	B	A	A	X	X	A	X	X	X	A	X	B	B	B	B	A
GM14:3606624	X	A	X	X	A	X	B	X	X	B	A	X	X	B	X	B	X	X	X	B	B	B	B	B	A	X	X	B	A	X	B	A	B	B	A	X	X	X	A	X	X	X	A	X	B	B	B	B	A
GM14:3643003	X	A	X	X	A	X	B	X	X	B	A	X	X	B	X	B	X	X	X	B	B	B	B	B	A	X	X	B	A	X	B	A	B	B	A	X	X	X	A	X	X	X	A	X	B	B	B	B	A
GM14:3785263	X	A	X	X	A	X	B	X	X	B	A	X	X	B	X	B	X	X	X	B	B	B	B	B	A	X	X	B	A	X	B	A	B	B	A	X	X	X	A	X	X	X	A	X	B	B	B	B	A
GM14:3787031	X	A	X	X	A	X	B	X	X	B	A	X	X	B	X	B	X	X	X	B	B	B	B	B	A	X	X	B	A	X	B	A	B	B	A	X	X	X	A	X	X	X	A	X	B	B	B	B	A
GM14:3787078	X	A	X	X	A	X	B	X	X	B	A	X	X	B	X	B	X	X	X	B	B	B	B	B	A	X	X	B	A	X	B	X	B	B	A	X	X	X	A	X	X	X	X	X	B	B	B	B	A
GM14:4506718	X	A	X	X	A	X	B	X	X	B	A	X	X	B	X	B	X	X	X	B	B	B	B	B	A	X	X	B	A	X	B	X	B	B	A	X	X	X	A	X	X	X	X	B	B	B	B	B	A
GM14:4605166	X	A	X	X	A	X	B	X	X	B	A	A	X	B	X	B	X	X	A	B	B	B	B	B	A	X	X	B	A	X	B	X	B	B	A	X	X	X	A	X	X	X	X	B	B	B	B	B	A
GM14:4658146	X	A	X	X	A	X	B	X	X	B	A	A	X	B	X	B	X	X	A	B	B	B	B	B	A	X	X	B	A	X	B	X	B	B	A	X	X	X	A	X	X	X	X	B	B	B	B	B	A
GM14:4724167	X	A	X	X	X	X	B	X	X	B	A	A	X	B	X	B	X	X	A	B	B	B	B	B	A	X	X	B	A	X	B	X	B	B	A	X	X	X	A	X	X	X	X	B	B	B	B	B	A
GM14:4979609	X	A	X	X	X	X	B	X	X	B	A	A	X	B	X	B	X	X	A	B	B	B	B	B	A	X	X	B	A	X	B	X	B	B	A	X	X	X	A	X	X	X	X	B	B	B	B	B	A
GM14:5297949	X	A	X	X	X	X	B	X	X	B	A	A	X	B	X	B	X	X	A	B	B	X	B	B	A	X	X	B	A	X	B	X	X	B	X	X	X	X	A	X	X	X	X	B	B	B	B	B	A
GM14:5884688	X	A	X	X	X	X	B	X	X	B	A	A	X	B	X	B	X	X	A	B	B	X	B	B	A	X	X	B	A	X	B	X	X	B	X	X	X	X	A	X	X	X	X	B	B	B	B	B	A
GM14:5907726	X	A	X	X	X	X	B	X	X	B	A	A	X	B	X	B	X	X	A	B	B	X	B	B	A	X	X	B	A	X	B	X	X	B	X	X	X	X	A	X	X	X	X	B	B	B	B	B	A
GM14:5951258	X	A	X	X	X	X	B	X	X	B	A	A	X	B	X	B	X	X	A	B	B	X	B	B	A	X	X	B	A	X	B	X	X	B	X	X	X	X	A	X	X	X	X	B	B	B	B	B	A
GM14:6553036	X	A	X	X	X	B	B	X	X	B	A	A	X	B	X	B	X	X	A	B	X	X	B	B	A	X	X	B	A	X	B	X	X	B	X	X	X	X	A	X	X	X	X	B	B	B	X	B	A
GM14:6626437	X	A	X	X	X	B	B	X	X	B	A	A	X	B	X	B	X	X	A	B	X	X	B	B	A	X	X	B	A	X	B	X	X	B	X	X	X	X	A	X	X	X	B	B	B	B	X	B	A
GM14:6909284	X	A	X	X	X	B	B	X	X	B	A	A	X	B	X	B	X	X	A	B	X	X	B	B	A	X	X	B	A	X	B	X	X	B	X	X	X	X	A	X	X	X	B	B	B	B	X	B	A
GM14:6976251	X	A	X	X	X	B	B	X	X	B	A	A	X	B	X	B	X	X	A	B	X	X	B	B	A	X	X	B	A	X	B	X	X	B	X	X	X	X	A	X	X	X	B	B	B	B	X	B	A
GM14:7261216	X	A	X	X	X	B	B	X	X	B	A	A	X	B	X	B	X	X	A	B	X	X	B	B	A	X	X	B	A	X	B	X	X	B	X	X	X	X	A	X	X	X	B	B	B	B	X	B	A
GM14:7418945	X	A	X	X	X	B	B	X	X	B	A	A	X	B	X	B	X	X	A	B	X	X	B	A	A	X	X	B	A	X	B	X	X	B	X	X	X	X	A	X	X	X	B	B	B	B	X	B	A
GM14:7491406	X	A	X	X	X	B	B	X	X	B	A	A	X	B	X	B	X	X	A	B	X	X	B	A	A	X	X	B	A	X	B	X	X	B	X	X	X	X	A	X	X	X	B	B	B	B	X	B	A
GM14:7497416	X	A	B	X	X	B	B	B	X	B	A	A	X	B	X	B	X	X	A	B	X	X	B	A	X	X	X	B	A	X	B	X	X	B	X	X	X	X	A	X	X	X	B	B	B	B	X	B	A
GM14:47549224	X	A	B	X	X	B	B	B	A	X	B	B	X	B	X	X	X	X	A	B	X	B	B	A	X	B	X	B	B	X	B	B	X	B	X	X	X	B	A	X	B	B	X	X	X	B	X	A	X
GM14:47592277	X	A	B	X	X	X	B	B	A	X	B	B	B	B	A	X	X	X	A	B	X	B	B	A	X	B	X	B	B	X	B	B	A	B	X	X	X	B	A	X	B	B	X	X	X	B	X	A	X
GM14:47607137	X	B	B	X	X	X	B	B	A	X	B	B	B	B	A	X	X	X	A	B	X	B	B	A	X	B	X	B	B	X	B	B	A	B	X	X	X	B	A	X	B	B	X	X	X	B	X	A	X
GM14:47622512	X	B	B	X	X	X	B	B	A	X	B	B	B	B	A	X	X	X	A	B	X	B	B	A	X	B	X	B	B	X	B	B	A	B	X	X	X	B	A	X	B	B	X	X	X	B	X	A	X
GM14:47666489	B	B	B	X	X	X	B	B	A	X	B	B	B	B	A	X	X	X	A	B	X	B	B	A	X	B	X	B	B	X	B	B	A	B	X	X	X	B	A	X	B	B	X	X	X	B	X	A	X
GM14:47666509	B	B	B	X	X	X	B	B	A	X	B	B	B	B	A	X	X	X	A	B	X	B	B	A	X	B	X	B	B	X	B	B	A	B	X	X	X	B	A	X	B	B	X	X	X	B	X	A	X
GM14:47676252	B	B	B	X	X	X	B	B	A	X	B	B	B	B	A	X	X	X	A	B	X	B	B	A	X	B	X	B	B	X	B	B	A	B	X	X	X	B	A	X	B	B	X	X	X	B	X	A	X
GM14:47756296	B	B	B	X	X	X	B	B	A	X	B	B	B	B	A	X	X	X	A	B	X	B	B	A	X	B	X	B	B	X	B	B	A	B	X	X	X	B	A	X	B	B	X	X	X	B	X	A	X
GM14:48089122	B	B	B	B	X	X	B	B	A	X	B	B	B	B	A	X	X	X	A	B	X	B	B	A	X	B	X	B	B	X	B	B	A	X	X	X	X	B	A	X	B	B	X	X	X	B	X	A	X
GM14:48605958	B	B	B	B	X	X	B	B	A	X	B	B	B	X	A	X	X	X	A	B	X	B	B	A	X	B	B	B	B	X	B	B	A	X	X	X	X	B	A	X	B	B	X	X	X	B	X	A	X
GM14:48624485	B	B	B	B	X	X	B	B	A	X	B	B	B	X	A	X	X	X	A	B	X	B	B	A	X	B	B	B	B	X	B	B	A	X	X	X	X	B	A	X	B	B	X	X	X	B	A	A	X
GM14:48626098	B	B	B	B	X	X	B	B	A	X	B	B	B	X	A	X	X	X	A	B	X	B	B	A	X	B	B	B	B	X	B	B	A	X	X	X	X	B	A	X	B	B	X	X	X	B	A	A	X
GM14:48696394	B	B	B	B	X	X	B	B	A	X	B	B	B	X	A	X	X	X	A	B	X	B	B	A	X	B	B	B	B	X	B	B	A	X	X	X	X	B	X	X	B	B	X	X	X	B	A	A	X
GM14:48696562	B	B	B	B	X	X	B	B	A	X	B	B	B	A	A	X	X	X	A	B	X	B	B	A	X	B	B	B	B	B	B	B	A	X	X	X	A	B	A	X	B	B	X	A	A	B	A	A	X
GM14:48779891	B	B	B	B	X	X	B	B	A	X	B	B	B	B	A	X	X	X	A	B	X	B	B	A	X	B	B	B	B	X	B	B	A	X	X	X	X	B	B	X	B	B	X	X	X	B	A	A	X
GM14:48780053	B	B	B	B	X	A	B	B	A	X	B	B	B	B	A	X	X	X	A	B	X	B	B	A	X	B	B	B	B	X	B	B	A	X	X	X	X	B	X	B	B	B	X	X	X	B	A	A	X
GM15:484899	X	X	A	B	X	X	B	X	A	B	B	X	X	X	X	X	X	B	B	X	A	X	B	B	B	A	X	A	B	A	B	B	X	B	X	X	X	A	A	B	B	B	B	B	X	B	A	X	B
GM15:598628	X	X	A	B	A	X	B	A	A	B	B	X	X	B	X	A	B	X	B	X	A	X	B	A	B	A	A	A	X	A	B	B	X	B	X	X	X	A	A	X	B	B	B	B	A	B	A	X	X
GM15:807807	X	X	A	B	X	X	B	X	A	B	X	X	X	B	X	X	X	B	X	X	A	X	B	X	B	A	X	A	A	A	B	B	X	X	X	X	X	A	A	B	B	B	B	B	X	X	A	X	X
GM15:943427	X	X	A	B	A	X	B	A	A	B	X	X	X	B	X	A	X	X	X	X	A	X	B	A	B	A	A	A	A	A	B	B	X	B	B	X	X	A	A	X	B	B	B	B	A	X	A	X	X
GM15:958397	B	X	A	B	X	X	B	X	X	B	X	X	X	B	X	X	X	B	X	X	A	B	B	X	B	X	X	A	A	A	B	B	X	X	A	X	X	A	A	B	B	B	B	B	X	X	A	X	X
GM15:999344	X	X	A	B	X	X	B	X	X	B	X	X	X	B	X	X	X	B	X	X	A	X	B	X	B	X	X	A	X	A	B	B	X	X	X	X	X	A	A	X	B	B	B	B	X	X	A	X	X
GM15:1301343	X	X	A	B	X	X	B	A	X	B	X	X	X	B	X	X	X	B	X	X	A	X	B	X	B	X	X	A	X	A	B	B	X	X	X	X	X	A	A	X	B	B	B	B	X	X	A	X	X
GM15:1488925	X	X	A	B	X	X	B	A	X	B	X	X	X	B	X	X	X	B	X	X	A	X	B	X	B	X	X	A	X	A	B	B	X	X	X	X	X	A	A	X	B	B	B	B	X	X	A	X	X
GM15:1504872	X	X	A	B	X	X	B	A	X	B	X	X	X	B	X	X	X	B	X	X	A	X	B	X	B	X	X	A	X	A	B	B	X	X	X	X	X	A	A	X	B	B	B	B	X	X	A	X	X
GM15:1615813	X	X	A	B	X	X	B	A	X	B	X	X	X	B	X	X	X	B	X	X	A	X	B	X	B	X	X	A	X	A	B	B	X	X	X	X	X	A	A	X	B	B	B	B	X	X	A	X	X
GM15:1768122	X	X	A	B	X	X	B	A	X	B	X	X	X	B	X	X	X	B	X	X	A	X	B	X	B	X	X	A	X	A	B	B	X	X	X	X	X	A	A	X	B	B	B	B	X	X	A	X	X
GM15:1890050	X	X	A	B	X	X	B	A	X	B	X	X	X	B	X	X	X	B	X	X	A	X	B	X	B	X	X	A	X	A	B	B	X	X	X	X	X	A	X	X	B	B	X	B	X	X	A	X	X
GM15:2174964	X	X	A	B	X	X	B	A	X	B	X	X	X	B	X	X	X	B	X	X	A	X	B	X	B	X	X	A	X	A	B	B	X	A	X	X	X	A	X	X	B	B	X	B	X	X	A	X	X
GM15:2340284	X	X	A	B	X	X	B	A	X	B	X	X	X	B	X	X	X	B	X	X	A	X	B	X	B	X	X	A	X	A	B	B	X	A	X	X	X	A	X	X	B	B	X	B	A	X	A	X	X
GM15:2510111	X	X	A	B	X	X	B	A	X	B	X	X	X	B	X	X	X	X	X	X	A	X	B	X	B	X	X	A	X	A	B	B	X	A	X	X	X	A	X	X	B	B	X	B	A	X	A	X	X
GM15:2531385	X	X	A	B	X	X	B	A	X	B	X	X	X	B	X	X	X	X	X	X	A	X	B	X	B	X	X	A	X	A	B	B	X	A	X	X	X	A	X	X	B	B	X	B	A	X	A	X	X
GM15:2630836	X	X	A	B	X	X	B	A	X	B	X	X	X	B	X	X	X	X	X	X	A	X	B	X	B	X	X	A	X	A	B	B	X	A	X	X	X	A	X	X	B	B	X	B	A	X	A	X	X
GM15:2669032	X	X	A	B	X	X	B	A	X	B	X	X	X	B	X	X	X	X	X	X	A	X	B	X	B	X	X	A	X	A	X	B	X	A	X	X	X	A	X	X	B	B	X	B	A	X	A	X	X
GM15:3593701	X	X	A	B	X	X	X	A	X	B	X	X	X	B	X	X	X	X	X	X	A	X	B	X	B	A	X	A	X	X	X	B	X	A	B	X	X	A	X	X	B	X	X	B	A	X	A	X	X
GM15:3657456	X	X	A	B	X	X	X	A	X	B	X	X	X	B	X	X	X	X	X	X	A	X	B	X	B	A	X	A	X	X	X	B	X	A	B	X	X	B	X	X	B	X	X	B	A	X	A	X	X
GM15:3686829	X	X	A	B	X	X	X	A	X	X	X	X	X	B	X	X	X	X	X	X	A	X	B	B	B	A	X	A	X	X	X	B	X	A	B	X	X	B	X	X	B	X	X	B	A	X	A	X	X
GM15:8671301	B	B	A	X	X	X	B	A	X	X	X	X	B	B	X	X	X	B	X	X	A	X	X	B	B	A	X	A	B	X	X	B	X	X	B	X	A	B	X	X	B	X	B	X	A	X	A	X	A
GM15:8682790	B	B	A	X	X	X	B	A	X	X	X	X	B	B	A	A	X	B	X	X	A	X	X	B	B	A	X	A	B	X	X	B	X	X	B	X	A	B	X	A	B	X	B	X	A	A	A	X	A
GM15:8696672	B	B	A	X	X	A	B	A	X	X	X	X	B	B	A	A	X	B	X	X	A	X	X	B	B	A	X	A	B	X	X	B	X	X	B	X	A	B	X	A	B	X	B	X	A	A	A	X	A
GM15:8860403	B	B	A	X	X	A	B	A	X	X	X	X	B	B	A	A	X	B	X	X	A	B	X	B	B	A	X	A	B	X	X	B	X	X	B	X	A	B	X	A	B	X	B	X	A	A	A	X	A
GM15:8864591	B	B	A	X	X	A	B	A	X	X	X	X	B	B	A	A	X	B	X	X	A	B	X	B	B	A	X	A	B	X	X	B	X	X	B	X	A	B	X	A	B	X	B	X	B	A	A	X	A
GM15:8921374	B	B	A	X	X	A	B	A	X	X	X	X	B	B	A	A	X	B	X	X	A	B	X	B	B	A	X	A	B	X	X	B	X	X	B	X	A	B	X	A	B	X	B	X	B	A	A	X	A
GM15:8992479	B	B	A	X	X	A	B	A	X	X	X	X	B	B	A	A	X	B	X	X	A	B	X	B	B	A	X	A	B	X	X	B	X	X	B	X	A	B	X	A	B	X	B	X	B	A	A	X	A
GM15:9931105	B	B	A	X	X	A	B	A	X	X	X	X	B	B	A	A	X	B	B	X	A	B	X	B	B	A	B	A	B	X	X	B	X	X	B	X	A	B	X	A	B	X	B	X	B	A	A	X	A
GM15:10107972	B	B	A	X	X	A	B	A	X	X	X	X	B	B	A	A	A	B	B	X	A	B	X	B	B	A	B	A	B	X	X	B	X	X	B	X	A	B	X	A	B	X	B	X	B	A	A	X	A
GM15:10136429	B	B	A	X	X	A	B	A	X	X	X	X	B	B	A	A	A	B	B	X	A	B	X	B	B	A	B	A	B	X	X	B	X	X	B	X	A	B	X	A	B	X	B	X	B	A	A	X	A
GM15:10731054	B	X	A	X	X	A	B	A	X	X	X	X	B	B	A	A	A	B	B	X	A	B	X	B	B	A	B	A	X	X	X	B	X	B	B	X	A	B	X	X	B	X	B	X	B	A	A	X	A
GM15:10773374	B	X	A	X	X	A	B	A	X	X	X	X	B	B	A	A	A	B	B	X	A	B	X	B	B	A	B	A	X	X	X	B	X	B	B	X	A	A	X	X	B	X	B	X	B	A	A	X	A
GM15:10877491	B	X	A	X	X	A	B	A	X	X	X	X	B	B	A	A	A	B	B	X	A	B	X	B	B	A	B	A	X	X	X	B	X	B	B	X	A	A	X	X	B	X	B	X	B	A	A	X	A
GM15:11110391	B	X	A	X	X	A	B	A	X	X	X	X	B	B	A	A	A	B	B	X	A	B	X	B	B	A	B	A	X	X	X	B	X	B	B	X	A	A	X	X	B	X	B	X	B	A	A	X	X
GM15:11406370	B	X	X	X	X	A	B	A	A	X	X	X	B	B	A	A	A	B	B	X	A	B	X	X	B	A	B	A	X	X	X	B	X	B	B	X	A	A	X	X	B	X	B	X	B	A	A	X	X
GM15:11441207	B	X	X	X	X	A	B	X	A	X	X	X	B	B	A	A	A	B	B	X	A	B	X	X	B	A	B	A	X	X	A	B	X	B	B	X	A	A	X	X	B	X	B	X	B	A	X	X	X
GM15:15888856	X	X	X	B	X	X	B	X	A	A	X	X	B	X	X	A	X	B	A	B	X	B	X	X	B	A	B	A	X	B	A	B	X	B	B	B	X	A	X	X	X	B	B	B	B	A	X	A	X
GM15:16781485	X	X	X	B	X	X	B	X	A	A	X	X	X	X	X	A	X	X	A	B	X	B	X	X	B	A	B	A	X	B	A	X	X	B	B	B	X	A	X	X	X	B	B	B	B	A	X	A	X
GM15:16782606	X	X	X	B	X	X	B	X	A	A	X	X	X	X	X	A	X	X	A	B	X	B	A	X	B	A	B	A	X	B	A	X	X	B	B	B	X	A	X	X	X	B	B	B	B	A	X	A	X
GM15:16796499	X	X	X	B	X	X	B	X	A	A	X	X	X	X	X	A	A	X	A	B	X	B	A	X	B	A	B	A	X	B	A	X	X	B	B	B	X	A	X	X	X	B	B	B	B	A	X	A	X
GM15:16799317	X	X	X	B	X	X	B	X	A	A	X	X	X	X	X	A	A	X	A	B	X	A	A	X	B	A	B	A	X	B	A	X	X	B	B	B	X	A	X	X	X	B	B	B	B	A	X	A	X
GM15:16809182	X	X	X	B	X	X	B	X	A	A	X	X	X	X	X	A	X	X	A	B	X	A	A	X	B	A	B	A	X	B	A	X	X	B	B	B	X	A	X	X	X	B	B	B	B	A	X	A	X
GM15:16819749	X	X	X	B	X	X	B	X	A	A	X	X	X	X	X	A	X	X	A	B	X	A	A	X	B	A	B	A	X	B	A	X	X	B	B	B	X	A	X	X	X	B	B	B	B	A	X	A	X
GM15:16981387	X	X	X	B	X	X	B	X	A	A	X	X	X	X	X	A	X	X	A	B	X	A	A	X	B	A	B	A	X	B	A	X	X	B	B	B	X	A	X	X	X	B	B	B	B	A	X	A	X
GM15:17327428	X	X	X	B	X	X	B	X	A	A	X	A	X	X	X	A	X	X	A	B	X	A	A	X	B	A	B	A	X	B	A	X	X	B	B	B	X	A	X	X	X	B	B	B	B	A	X	A	X
GM15:17362634	X	X	X	B	X	X	B	X	A	A	X	A	X	X	X	A	X	X	A	B	X	A	A	X	B	A	B	A	X	B	A	X	X	B	B	B	X	A	X	X	X	B	B	B	B	A	X	A	X
GM15:17534837	X	X	X	B	X	X	X	X	A	A	X	A	X	X	X	A	X	X	A	B	X	A	A	X	B	A	B	A	X	B	A	X	X	B	B	B	X	A	X	X	X	B	B	B	B	A	X	A	X
GM15:20470135	X	X	X	B	X	X	X	X	A	A	X	A	X	X	X	A	X	X	A	B	X	A	A	X	B	A	B	A	X	B	A	X	X	B	B	B	X	A	X	X	X	B	B	B	B	X	X	A	X
GM15:20547434	X	X	X	B	X	X	X	X	A	A	X	A	X	X	X	A	X	X	A	B	X	A	A	X	B	A	B	A	X	B	A	X	X	B	B	B	X	A	X	X	X	B	B	B	B	X	X	A	X
GM15:20814426	X	X	X	B	X	X	X	X	A	A	X	A	X	X	X	A	X	X	A	B	X	A	A	X	B	A	B	A	X	B	A	X	X	B	B	B	X	A	X	X	X	B	B	B	B	X	X	A	X
GM15:20843648	X	X	X	B	X	X	X	X	A	A	X	A	X	X	X	A	X	X	A	B	X	A	A	X	B	A	B	A	X	B	A	X	X	B	B	B	X	A	X	X	X	B	B	B	B	X	X	A	X
GM15:21325747	X	X	X	B	X	X	X	X	A	A	X	A	X	X	X	A	X	X	A	B	X	A	A	X	B	A	B	A	X	B	A	X	X	B	B	B	X	A	X	X	X	B	B	B	B	X	X	A	X
GM15:21373859	X	X	X	B	X	X	X	X	A	A	X	A	X	X	X	A	X	X	A	B	X	A	A	X	B	A	B	A	X	B	A	X	X	B	B	B	X	A	X	X	X	B	B	B	B	X	X	A	X
GM15:22581813	X	X	X	B	X	X	X	X	A	A	X	A	X	X	X	A	X	X	A	B	X	A	A	X	B	A	B	A	X	B	A	X	X	B	B	B	X	A	X	X	X	B	B	B	B	X	X	A	X
GM15:22699897	X	X	X	B	X	X	X	X	A	A	X	A	X	X	X	A	X	X	A	B	X	A	A	X	B	A	B	A	X	B	A	X	X	B	B	B	X	A	X	X	X	B	B	B	B	X	X	A	X
GM15:22972123	X	X	X	B	X	X	X	X	A	A	X	A	X	X	X	A	X	X	A	B	X	A	A	X	B	A	B	A	X	B	A	X	X	B	B	B	X	A	X	X	X	B	B	B	B	X	X	A	X
GM15:23360966	X	X	X	B	X	X	X	X	A	A	X	A	X	X	X	A	X	X	A	B	X	A	A	X	B	A	B	A	X	B	A	X	X	B	B	B	X	A	X	X	X	B	B	B	B	X	X	A	X
GM15:23599031	X	X	X	B	X	X	X	X	A	A	X	A	X	X	X	A	X	X	A	B	X	A	A	X	B	A	B	A	X	B	A	X	X	B	B	B	X	A	X	X	X	B	B	B	B	X	X	A	X
GM15:32829022	X	X	X	B	X	X	X	X	A	A	X	A	X	X	X	A	X	X	A	B	X	A	A	X	B	A	B	A	X	B	A	X	X	B	B	B	X	A	X	X	X	B	B	B	B	X	X	A	X
GM15:37581457	X	X	X	B	X	X	X	X	A	A	X	A	X	X	X	A	X	X	A	B	X	A	A	X	B	A	B	A	X	B	A	X	X	B	B	B	X	A	X	X	X	B	B	B	B	X	X	A	X
GM15:37810828	X	X	X	B	X	X	X	X	A	A	X	A	X	X	X	A	X	X	A	B	X	A	A	X	B	A	B	A	X	B	A	X	X	B	B	B	X	A	X	X	X	B	B	B	B	X	X	A	X
GM15:39906380	X	X	X	B	X	X	X	X	A	A	X	A	X	X	X	A	X	X	A	B	X	A	A	X	B	A	B	A	X	B	A	X	X	B	B	B	X	A	X	X	X	B	B	B	B	X	X	A	X
GM15:40628578	X	X	X	B	X	X	X	X	A	A	X	A	X	X	X	A	X	X	A	B	X	A	A	X	B	A	B	A	X	B	A	X	X	B	B	B	X	A	X	X	X	B	B	B	B	X	X	A	X
GM15:40893030	X	X	X	B	X	X	X	X	A	A	X	A	X	X	X	A	X	X	A	B	X	A	A	X	B	A	B	A	X	B	A	X	X	B	B	B	X	A	X	X	X	B	B	B	B	X	X	A	X
GM15:43131000	X	X	X	B	X	X	X	X	A	A	X	A	X	X	X	A	X	X	A	B	X	A	A	X	B	A	B	A	X	B	A	X	X	B	B	B	X	A	X	X	X	B	B	B	B	X	X	A	X
GM15:43979124	X	X	X	B	X	X	X	X	A	A	X	A	X	X	X	A	X	X	A	B	X	A	A	X	B	A	B	A	X	B	A	X	X	B	B	B	X	A	X	X	X	B	B	B	B	X	X	A	X
GM15:44322902	X	X	X	B	X	X	X	X	A	A	X	A	X	X	X	A	X	X	A	B	X	A	A	X	B	A	B	A	X	B	A	X	X	B	B	B	X	A	X	X	X	B	B	B	B	X	X	A	X
GM15:44531963	X	X	X	B	X	X	X	X	A	A	X	A	X	X	X	A	X	X	A	B	X	A	A	X	B	A	B	A	X	B	A	X	X	B	B	B	X	A	X	X	X	B	B	B	B	X	X	A	X
GM15:44788446	X	X	X	B	X	X	X	X	A	A	X	A	X	X	X	A	X	X	A	B	X	A	A	X	B	A	B	A	X	B	A	X	X	B	X	B	X	A	X	X	X	B	B	B	B	X	X	A	X
GM15:45195112	X	X	X	B	X	X	X	X	A	A	X	A	X	X	X	A	X	X	A	B	X	A	A	X	B	A	B	A	X	B	A	B	X	B	X	B	X	A	X	X	X	B	B	B	B	X	X	A	X
GM15:46451971	X	X	X	B	X	X	X	X	A	A	X	A	X	X	X	A	X	X	A	B	X	A	A	X	B	A	B	A	X	B	A	B	X	B	X	B	X	A	X	X	X	B	B	B	B	X	X	A	X
GM15:47173534	X	X	X	B	X	X	X	X	A	A	X	A	X	X	X	A	X	X	A	B	X	A	A	X	X	A	B	A	X	B	A	B	X	B	X	B	X	A	X	X	X	B	B	B	B	X	X	A	X
GM15:47476421	X	X	X	B	X	X	X	X	A	A	X	A	X	X	X	A	X	X	A	B	X	A	A	X	X	A	B	A	X	B	A	B	X	B	X	B	X	A	X	X	X	B	B	B	B	X	X	A	X
GM15:48782223	X	X	B	B	X	X	X	X	A	A	X	A	X	X	X	B	X	B	A	B	A	A	A	X	X	A	B	A	X	B	A	B	X	B	X	B	B	A	X	X	B	B	B	B	B	X	A	A	B
GM15:48855134	X	X	B	B	A	X	X	X	A	A	X	A	X	X	X	B	X	B	A	B	A	A	A	X	X	A	B	A	X	B	A	B	X	B	X	B	B	A	X	X	B	B	B	B	B	X	A	A	B
GM15:48918818	X	X	B	B	A	X	X	X	A	A	X	A	X	X	X	B	X	B	A	B	A	A	A	X	X	A	B	A	X	B	A	B	X	B	X	B	B	A	X	X	B	B	B	B	B	X	A	A	B
GM15:49336486	X	X	B	B	A	X	X	X	A	A	X	A	X	X	X	B	X	B	A	B	A	A	A	X	X	A	B	A	X	B	A	B	X	B	X	B	B	A	X	X	B	B	B	B	B	X	A	A	B
GM15:49358567	X	X	B	B	A	X	X	X	A	A	X	A	X	X	X	B	X	B	A	B	A	A	A	X	X	A	B	X	X	B	A	B	X	B	X	B	B	A	X	X	B	B	B	B	B	X	A	A	B
GM15:49359306	X	X	B	B	A	X	X	X	X	A	X	A	X	X	X	B	X	B	A	B	A	A	A	X	X	A	B	X	X	B	X	B	X	B	X	B	B	A	X	X	B	B	B	X	B	X	A	A	B
GM15:49366538	X	X	B	B	A	X	X	X	X	A	X	A	X	X	X	B	A	B	A	X	X	A	X	B	X	A	X	X	X	B	X	B	X	B	X	B	B	A	B	X	B	X	B	X	B	X	A	A	B
GM15:49385092	X	X	B	B	A	X	X	X	X	A	X	A	X	X	X	B	X	B	A	X	X	A	X	B	X	A	X	X	X	B	X	B	X	B	X	B	B	A	X	X	B	X	B	X	B	X	A	A	B
GM15:49442075	X	B	B	B	A	A	B	A	X	A	X	A	X	X	X	B	X	B	A	A	X	A	A	B	A	A	B	X	B	B	B	B	A	B	X	B	B	A	B	X	B	X	B	B	B	A	A	A	B
GM15:49442237	X	X	B	B	A	A	X	X	X	A	A	A	B	X	X	B	X	B	A	X	X	A	A	B	X	A	A	B	X	B	X	B	X	B	X	B	B	A	B	X	B	B	B	X	B	X	A	A	X
GM15:49771630	X	B	B	B	A	B	X	X	B	A	X	A	X	X	B	B	X	B	X	X	X	A	X	B	X	A	X	X	X	B	B	B	B	B	X	B	B	A	X	X	B	B	B	X	B	X	A	A	B
GM16:17858	B	X	B	B	X	B	X	X	X	X	A	A	A	X	X	X	B	X	B	A	X	X	X	X	A	A	A	B	B	X	X	X	X	A	A	X	X	A	A	B	B	X	X	X	X	B	X	X	X
GM16:18007	B	X	B	B	X	B	X	X	X	X	A	A	A	X	X	X	B	X	B	A	X	X	X	X	A	A	A	B	B	X	X	X	X	A	A	X	X	A	A	B	B	X	X	X	X	B	X	X	X
GM16:31887	B	X	B	B	X	B	X	X	X	X	A	A	A	X	X	X	B	X	B	A	X	X	X	X	A	A	A	B	B	X	X	X	X	A	A	X	X	A	A	B	B	X	X	X	X	B	X	X	X
GM16:60357	B	X	B	B	X	B	X	X	X	X	A	A	A	X	X	X	B	X	B	A	X	X	X	X	A	A	A	B	B	X	X	X	X	A	A	X	A	A	A	B	B	A	X	A	X	B	A	X	X
GM16:68680	B	X	B	B	X	B	X	X	X	X	A	A	A	X	X	X	B	X	B	A	X	X	X	X	A	A	A	B	B	X	X	X	X	A	A	X	X	A	A	B	B	X	X	B	X	B	X	X	X
GM16:68829	B	X	B	B	X	B	X	X	X	X	A	A	A	X	X	X	B	X	B	A	X	X	X	X	A	A	A	B	B	X	X	X	X	A	A	X	X	A	A	B	B	X	X	X	X	B	X	X	X
GM16:69307	B	X	B	B	X	B	X	X	X	X	A	A	A	X	X	X	B	X	B	A	X	X	X	X	A	A	A	B	B	X	X	X	X	A	A	X	X	A	A	B	B	X	X	A	X	B	X	X	X
GM16:638517	B	X	B	B	X	B	X	X	X	X	A	A	A	X	X	X	B	X	B	A	X	X	X	X	A	A	A	B	B	X	X	X	X	A	A	X	X	A	A	B	B	X	X	A	X	B	X	X	X
GM16:724973	B	X	B	X	X	B	X	X	X	X	A	A	A	X	X	X	B	X	B	A	X	X	X	X	A	A	A	B	B	X	X	X	X	A	A	X	X	A	A	B	B	X	X	A	X	B	X	X	X
GM16:781974	B	X	B	X	X	B	X	X	X	X	A	A	A	X	X	X	B	X	B	A	X	X	X	X	A	A	A	B	B	X	X	X	X	A	A	X	X	A	A	B	B	X	X	A	X	B	X	X	X
GM16:1021795	B	X	B	X	X	B	X	X	X	X	A	A	A	X	X	X	B	X	B	A	X	X	X	X	A	A	A	B	B	X	X	X	X	A	A	X	X	A	A	B	B	X	X	A	X	B	X	X	A
GM16:1526383	X	X	B	X	X	B	X	X	X	X	A	A	A	X	X	X	X	X	B	A	X	X	X	X	A	A	A	B	B	X	X	X	X	A	A	X	X	A	A	B	B	X	X	A	X	B	X	X	A
GM16:1526409	X	X	B	X	X	B	X	X	X	X	A	A	A	X	X	X	X	X	B	A	X	X	X	X	A	A	A	B	B	X	X	X	X	A	A	X	X	A	A	B	B	X	X	A	X	B	X	X	A
GM16:1602671	X	X	B	X	X	B	X	X	X	X	A	A	A	X	X	X	X	X	B	A	X	X	X	X	A	A	A	B	B	X	X	X	X	A	A	X	X	A	A	B	B	X	X	A	X	B	X	X	A
GM16:1612441	X	X	B	X	X	B	X	X	X	X	A	A	A	X	X	X	X	X	B	A	X	X	X	X	A	A	A	B	B	X	X	X	X	A	A	X	X	A	A	B	B	X	X	A	X	B	X	X	A
GM16:1630079	X	X	B	X	X	B	X	X	X	X	A	A	A	X	X	X	X	X	B	A	X	X	X	X	A	A	A	B	B	X	X	X	X	A	A	X	X	A	A	B	B	X	X	A	X	B	X	X	A
GM16:1856059	X	X	B	X	X	B	X	X	X	X	A	A	A	X	X	X	X	X	B	A	X	X	X	X	A	A	A	B	B	X	X	X	X	A	A	X	X	A	A	B	B	X	X	X	X	B	X	X	A
GM16:2542027	X	X	B	X	X	B	X	X	X	X	A	A	A	X	X	X	X	X	B	A	X	X	X	X	A	A	A	B	B	X	X	X	X	A	A	X	X	A	A	B	B	X	X	X	X	B	X	A	A
GM16:2544055	X	X	B	X	X	B	X	X	X	X	A	A	A	X	X	X	X	X	B	A	X	X	X	X	A	A	A	B	B	X	X	X	X	A	A	X	X	A	A	B	B	X	X	X	X	B	X	A	A
GM16:2693860	X	X	B	X	X	B	X	X	X	X	A	A	A	X	X	X	X	X	B	A	X	X	X	X	A	A	A	B	B	X	X	X	X	A	A	X	X	A	A	B	B	X	X	X	X	B	X	A	A
GM16:2758543	X	X	B	X	X	B	X	X	X	X	A	A	A	X	X	X	X	X	B	A	X	X	X	X	A	A	A	B	B	X	X	X	X	A	A	X	X	A	A	B	B	X	X	X	X	B	X	A	A
GM16:2883117	X	X	B	X	X	B	X	B	X	X	A	A	A	X	X	X	X	X	B	A	X	X	X	X	A	A	A	B	B	X	X	X	X	A	A	X	X	A	A	B	B	X	X	X	X	B	X	A	A
GM16:2918950	X	X	B	X	X	B	X	B	X	X	A	A	A	X	X	X	X	X	B	A	X	X	X	X	A	A	A	B	B	X	X	X	X	A	A	X	X	A	A	B	B	X	X	X	X	B	X	A	A
GM16:3063163	X	X	B	X	X	B	X	B	X	X	A	A	A	X	X	X	X	X	B	A	X	X	X	X	A	A	A	B	B	X	X	X	X	A	A	X	X	A	A	B	B	X	X	X	X	B	X	A	A
GM16:3346504	X	X	B	A	X	B	X	B	A	X	A	A	A	X	X	X	X	X	B	A	X	X	X	X	A	A	A	B	B	X	X	X	X	A	A	X	X	A	A	B	B	X	X	X	X	B	X	A	A
GM16:3585002	X	X	B	A	X	B	X	B	A	X	A	A	A	X	X	X	X	X	B	A	X	X	X	X	A	A	A	B	B	X	X	X	X	A	A	X	X	A	A	B	B	X	X	X	X	X	X	A	A
GM16:3627910	X	X	B	A	X	B	X	B	A	X	A	A	A	X	X	X	X	X	B	A	X	X	X	X	A	A	A	B	B	X	X	X	X	A	A	X	X	A	A	B	B	X	X	X	X	X	X	A	A
GM16:3739791	X	X	B	A	X	B	X	B	A	X	A	A	A	X	X	X	X	X	B	A	X	X	X	X	A	A	A	B	B	X	X	X	X	A	A	X	X	A	A	B	B	X	X	X	X	X	X	A	A
GM16:4855876	X	X	B	A	X	B	X	B	A	X	A	A	A	X	X	X	X	X	X	A	X	X	B	X	A	X	A	B	B	X	X	X	X	A	A	X	X	A	A	B	B	B	X	X	B	X	X	A	A
GM16:4875047	X	X	B	A	X	B	X	B	A	X	A	A	A	X	X	X	X	X	X	A	X	X	B	X	A	X	A	B	B	X	X	X	A	A	A	X	X	A	A	B	B	B	X	X	B	X	X	A	A
GM16:4931713	X	X	B	A	X	B	X	B	A	X	A	A	A	X	X	X	X	X	X	A	X	X	B	X	A	X	A	B	B	X	X	X	A	A	A	X	X	A	A	B	B	B	X	X	B	X	X	A	A
GM16:4945172	X	X	B	A	X	B	X	B	A	X	A	A	X	X	X	X	X	X	X	A	X	X	B	X	B	X	A	B	B	X	X	X	A	A	A	X	X	A	A	B	B	B	X	X	B	X	X	A	A
GM16:6934690	X	X	A	A	X	X	X	B	X	X	X	A	X	X	B	X	X	X	X	B	X	X	B	X	B	X	X	B	B	X	X	A	A	A	A	X	X	A	A	B	B	B	X	X	B	X	X	A	A
GM16:7026287	X	X	A	A	X	X	X	B	X	X	X	A	X	X	B	X	A	X	X	B	X	X	B	X	B	X	X	B	B	B	X	A	A	A	A	X	X	A	A	B	A	B	X	X	B	X	X	A	A
GM16:7301072	A	X	A	A	X	X	X	B	X	X	X	A	X	X	B	X	A	X	X	B	X	X	B	X	B	X	X	B	B	B	X	A	A	A	A	X	X	A	A	B	A	B	X	X	B	X	X	A	A
GM16:7317205	A	X	A	A	X	X	X	B	X	X	X	A	X	X	B	X	A	X	X	B	X	X	B	X	B	X	X	B	B	B	X	A	A	A	A	X	X	A	A	B	A	B	X	X	B	X	X	A	A
GM16:7539476	A	X	A	A	X	X	X	B	X	X	X	A	X	X	B	X	A	X	X	B	X	A	B	X	B	X	X	B	B	B	B	A	A	A	A	X	X	A	A	B	A	B	X	X	B	X	X	A	A
GM16:7618284	A	B	A	A	X	X	X	B	X	X	X	A	X	X	B	X	A	X	X	B	X	A	B	X	B	X	X	B	B	B	B	A	A	A	A	X	X	A	A	B	A	B	X	X	B	X	X	A	A
GM16:7968949	A	B	A	A	X	X	X	B	X	X	X	A	X	X	B	X	A	X	X	B	X	A	B	X	B	X	X	B	B	B	B	A	A	A	A	X	X	A	X	B	A	B	X	X	B	X	X	A	A
GM16:8179117	A	B	A	A	X	X	X	B	X	X	X	A	X	X	B	X	A	X	X	B	X	A	B	X	B	X	X	B	B	B	B	A	A	X	A	X	X	A	X	B	A	B	X	X	B	X	X	A	A
GM16:9835461	A	B	A	A	X	X	X	B	X	X	X	A	X	X	B	X	A	X	X	B	X	A	B	X	B	X	X	B	B	B	B	A	A	X	A	X	X	A	X	B	A	B	X	X	B	X	X	A	A
GM16:10592277	A	B	A	A	X	X	X	B	X	X	X	A	X	X	B	X	A	X	X	B	X	A	B	X	B	X	X	B	B	B	B	A	A	X	A	X	X	A	X	B	A	B	X	X	B	X	X	A	A
GM16:10952806	A	B	A	A	X	X	X	B	X	X	X	A	X	X	B	X	A	X	X	B	X	A	B	X	B	X	X	B	B	B	B	A	A	B	A	X	X	A	X	B	A	B	X	X	B	X	X	A	A
GM16:18876910	A	B	A	A	X	X	X	B	X	X	X	A	X	X	B	X	A	X	X	B	X	A	B	X	B	X	X	B	B	B	B	A	A	B	A	X	X	A	X	B	A	B	X	X	B	X	X	A	A
GM16:23719073	A	B	A	A	X	X	X	B	X	X	X	A	X	X	B	X	A	X	X	B	X	A	B	X	B	X	X	B	B	B	B	A	A	B	A	X	X	A	X	B	A	B	X	B	B	X	X	A	A
GM16:25072444	A	B	A	A	X	X	X	B	X	X	X	A	X	X	B	X	A	X	X	B	X	A	B	X	B	X	X	B	B	B	B	A	A	B	A	X	X	A	X	B	A	B	X	B	B	X	X	A	A
GM16:27182787	A	B	A	X	X	X	X	X	X	X	X	A	X	X	B	A	A	X	X	B	X	A	B	X	B	X	A	B	B	B	B	A	A	B	A	X	X	A	X	B	A	B	X	B	B	X	X	A	A
GM16:27318125	A	B	A	X	X	X	X	X	X	X	X	A	X	X	B	A	A	X	X	B	X	A	B	X	B	X	A	B	X	B	B	A	A	B	A	X	X	A	X	B	A	B	X	B	B	X	X	A	A
GM16:27510547	A	X	A	X	X	X	X	X	X	X	X	A	X	X	B	A	A	X	X	B	X	A	B	X	B	X	A	B	X	B	B	A	A	B	A	X	X	A	X	B	A	B	X	B	B	X	X	A	A
GM16:27874779	A	X	A	X	X	X	X	X	X	X	X	A	X	X	B	A	A	X	X	B	X	A	B	X	B	X	A	B	X	B	B	A	A	B	A	X	X	A	X	B	A	B	X	B	B	X	X	A	A
GM16:27945004	A	X	A	X	X	X	X	X	X	X	X	A	X	X	B	A	A	X	X	B	X	A	B	X	B	X	A	B	X	B	B	A	A	B	A	X	X	A	X	B	A	B	X	B	B	X	X	A	A
GM16:28388385	A	X	A	X	X	X	X	X	X	X	X	A	X	X	B	A	A	X	X	B	X	X	B	X	B	X	A	B	X	B	B	A	A	B	X	X	X	A	X	B	A	B	X	B	B	X	X	A	A
GM16:28687279	A	X	A	X	X	X	X	X	X	X	X	A	X	X	B	A	A	X	X	B	X	X	B	X	B	X	A	B	X	B	B	A	A	B	X	X	X	A	X	B	A	B	X	B	B	X	X	A	A
GM16:28711544	A	X	A	X	X	X	X	X	X	X	X	A	A	X	B	A	A	X	X	B	X	X	B	X	B	X	A	B	X	B	B	A	A	B	X	X	X	A	X	B	A	B	X	B	B	X	X	A	A
GM16:28771344	A	X	A	X	X	X	X	X	X	X	X	A	A	X	B	A	A	X	X	B	X	X	B	X	B	X	A	B	X	B	B	A	A	B	X	X	X	A	X	B	A	B	X	B	B	X	X	A	A
GM16:28792759	A	X	A	X	X	X	X	X	X	X	X	A	A	X	B	A	A	X	X	B	X	X	B	A	B	X	A	B	X	B	B	A	A	B	X	X	X	A	X	B	A	B	X	B	B	X	X	A	A
GM16:28926313	A	X	A	X	X	X	X	X	X	X	X	A	A	X	B	A	A	X	X	B	X	X	B	A	B	X	A	B	X	B	B	A	A	B	X	X	X	A	X	B	A	B	X	B	B	X	A	A	A
GM16:28997668	A	X	A	X	X	X	X	X	X	X	X	A	A	X	B	A	A	X	X	B	X	X	B	A	B	X	A	B	X	B	B	A	A	B	X	X	X	X	X	B	A	B	X	B	B	X	A	A	A
GM16:29523383	A	X	A	X	X	X	X	X	X	X	A	A	A	X	B	A	A	X	X	B	X	X	B	A	B	X	A	B	X	B	B	A	A	B	X	X	X	X	X	B	A	B	X	B	B	X	A	A	A
GM16:29691657	A	X	A	X	X	X	X	X	X	X	A	A	A	X	B	A	A	X	X	X	X	X	B	A	B	X	A	B	X	B	B	A	A	B	X	X	X	X	X	B	A	B	X	B	B	X	A	A	A
GM16:29887022	A	X	A	X	X	X	X	X	X	X	A	A	A	X	B	A	A	X	X	X	X	X	B	A	B	X	A	B	X	B	B	A	A	B	X	X	X	X	X	X	A	B	X	B	B	X	A	A	A
GM16:30061069	A	X	A	X	X	X	X	X	X	X	A	A	A	X	B	A	A	X	X	X	X	X	B	A	B	X	A	X	X	B	B	A	A	B	X	X	X	X	X	X	A	B	X	B	B	X	A	A	A
GM16:30346317	A	X	A	X	X	X	X	X	B	X	A	A	A	X	B	A	X	X	X	X	X	X	B	A	B	X	A	X	X	B	X	A	A	B	X	X	X	X	X	X	A	B	X	B	B	X	A	A	A
GM16:30346421	A	X	A	X	X	X	X	X	B	X	A	A	A	X	X	A	X	X	X	X	X	X	B	A	B	X	A	X	X	B	X	A	A	B	X	X	X	X	X	X	A	B	X	B	B	X	A	A	A
GM16:30552947	A	X	A	X	X	X	X	X	B	X	A	A	A	X	X	A	X	X	X	X	X	X	B	A	B	X	A	X	X	B	X	A	A	B	X	X	X	X	X	X	A	B	A	B	B	X	A	A	A
GM16:30671452	A	X	A	X	X	X	X	X	B	X	A	A	A	X	X	A	X	X	X	X	X	X	B	A	B	X	A	X	X	B	X	A	A	B	X	X	X	X	X	X	A	B	A	B	B	X	A	A	A
GM16:31395254	A	X	A	X	X	X	A	X	B	B	A	A	A	X	X	A	X	X	X	X	X	X	B	A	B	X	A	X	X	B	X	A	A	B	X	B	X	X	X	X	A	B	A	B	B	A	A	A	A
GM16:31502165	A	X	A	X	X	X	A	X	B	B	A	A	A	X	X	A	X	X	X	X	X	X	B	A	B	X	A	X	X	X	X	A	A	B	X	B	X	X	X	X	A	B	A	B	B	A	A	A	A
GM16:31513904	A	X	X	X	X	X	A	X	B	B	A	A	A	X	X	A	X	X	X	X	X	X	B	A	B	X	A	X	X	X	X	A	A	B	X	B	X	X	X	X	A	B	A	B	B	A	A	A	A
GM16:31702808	X	X	X	X	X	X	A	X	B	B	A	X	A	X	X	A	X	X	X	X	X	X	B	A	X	X	A	X	X	X	X	A	A	B	X	B	X	X	X	X	A	B	A	B	B	A	A	A	A
GM16:31703036	X	X	X	X	X	X	A	X	B	B	A	X	A	X	X	A	X	X	X	X	X	X	B	A	X	X	A	X	X	X	X	A	A	B	X	B	X	X	B	X	A	B	A	B	B	A	A	A	A
GM16:31840567	X	X	X	X	X	X	A	X	B	B	A	X	A	X	X	A	X	X	X	X	X	X	B	A	X	X	A	X	X	X	X	A	A	B	X	B	X	X	X	X	A	B	A	B	B	A	A	A	A
GM16:31849307	X	B	X	X	B	B	A	X	B	B	A	A	A	X	B	A	X	X	X	B	A	X	B	A	X	B	A	B	B	A	X	A	A	B	X	B	X	X	X	B	A	B	A	B	B	A	A	A	A
GM16:31951879	X	X	X	X	X	B	A	A	B	B	A	X	A	X	B	A	X	B	X	B	B	X	B	A	X	X	A	X	X	X	X	A	A	B	X	B	A	A	A	B	A	B	A	B	B	A	A	A	A
GM17:285231	B	X	X	X	A	A	X	X	X	X	X	X	X	X	A	X	B	B	X	B	X	A	A	X	X	X	X	X	B	X	X	X	B	X	X	A	X	B	X	X	B	X	X	B	B	X	X	B	A
GM17:415405	B	X	X	X	A	A	X	X	X	X	X	X	X	X	A	X	B	B	X	B	X	A	A	X	X	X	X	X	B	X	X	X	B	X	X	A	X	B	X	X	B	X	X	B	B	X	B	B	A
GM17:423737	B	X	X	X	A	A	X	X	X	X	X	X	X	X	A	X	B	B	X	B	X	A	A	X	X	X	X	X	B	X	X	X	B	X	X	A	X	B	X	X	B	X	X	B	B	X	X	B	A
GM17:470735	B	A	X	A	A	A	X	A	X	X	X	X	X	X	A	X	B	B	X	B	X	A	A	X	X	X	X	X	B	X	X	X	B	X	X	A	X	B	A	X	B	X	X	B	B	X	X	B	A
GM17:496580	B	X	X	X	A	A	X	X	X	X	X	X	X	X	A	X	B	B	X	B	X	A	A	X	X	X	X	X	B	X	X	X	B	X	X	A	X	B	X	X	B	X	X	B	B	X	X	B	A
GM17:608239	B	X	X	X	A	A	X	X	X	X	X	X	X	X	A	X	B	B	X	B	X	A	A	X	B	X	X	X	B	X	X	X	B	X	A	A	B	B	X	X	B	A	X	B	B	X	X	B	A
GM17:664440	B	X	X	X	A	A	X	X	A	X	X	X	X	X	A	X	B	B	X	B	X	A	A	X	B	X	X	X	B	X	X	X	A	A	A	A	B	B	X	X	B	A	X	B	B	X	X	B	A
GM17:716345	B	X	X	X	A	A	X	X	A	X	X	X	X	X	A	X	B	B	X	B	X	A	A	X	B	X	X	X	B	X	X	X	A	A	A	A	B	B	X	X	B	A	X	B	B	X	X	B	A
GM17:796978	B	X	X	X	A	X	X	X	A	X	X	X	X	X	A	X	B	B	X	B	X	A	A	X	B	X	X	X	B	X	X	X	A	A	A	A	B	B	X	X	B	A	X	B	B	X	X	B	X
GM17:2195025	B	X	X	X	A	X	X	X	A	X	X	X	X	X	A	X	B	B	X	B	X	A	A	X	X	X	X	X	B	X	X	X	A	A	A	A	B	B	X	X	B	A	X	B	X	X	X	X	X
GM17:2447875	B	X	X	X	A	X	X	X	A	X	X	X	X	X	A	X	B	B	X	B	X	A	A	X	X	X	X	X	B	X	X	X	A	A	A	A	B	B	X	X	B	A	X	B	X	X	X	X	X
GM17:2452744	B	X	X	X	A	X	X	X	A	X	X	X	X	X	A	X	B	B	X	B	X	A	A	X	X	X	X	X	B	X	X	X	A	X	A	A	B	B	X	X	B	A	X	B	X	X	X	X	X
GM17:2468970	B	X	X	X	A	X	X	X	A	X	X	X	X	X	A	X	B	B	X	B	X	A	A	X	X	X	X	X	B	X	X	X	A	X	A	A	B	B	X	X	B	A	X	B	X	X	X	X	X
GM17:3206633	X	X	X	X	A	X	X	X	A	X	X	X	X	X	A	X	B	B	X	X	B	A	A	X	X	X	X	X	B	X	X	X	A	X	A	A	B	X	X	X	X	A	A	B	X	X	X	X	X
GM17:3271562	X	X	X	X	A	X	X	X	A	X	X	A	X	X	A	X	B	B	X	X	B	A	A	X	X	X	X	X	B	X	X	X	A	X	A	A	B	X	X	X	X	A	A	B	X	X	X	X	X
GM17:3285740	X	X	X	X	A	X	X	X	A	X	X	A	X	X	A	X	B	B	X	X	B	A	A	X	X	X	X	X	B	X	X	X	A	X	A	A	B	X	X	X	X	A	A	B	X	X	X	X	X
GM17:3288773	X	X	X	X	A	X	X	X	A	X	X	A	X	X	A	X	B	B	X	X	B	A	A	X	X	X	X	X	B	X	X	X	A	X	A	A	B	X	X	X	X	A	A	B	X	X	X	X	X
GM17:3685118	X	X	X	X	A	X	X	X	A	X	X	A	X	X	A	X	B	X	X	X	B	A	A	X	X	X	X	X	B	X	X	A	A	X	A	A	B	X	X	X	X	A	A	B	X	X	X	X	X
GM17:3694817	X	X	X	X	A	X	X	X	A	X	X	A	X	X	A	X	B	X	A	X	B	A	A	X	X	X	X	X	B	X	X	A	A	X	A	A	B	X	X	X	X	A	A	B	X	X	X	X	X
GM17:3737702	X	X	X	X	X	X	X	X	A	X	X	A	X	X	A	X	B	X	A	X	B	A	A	X	X	X	X	X	B	X	X	A	A	X	A	A	B	X	X	X	X	A	A	B	X	X	X	X	X
GM17:3923288	X	X	X	X	X	X	X	X	A	B	X	A	X	X	A	X	B	X	A	X	B	A	A	X	X	X	X	X	B	X	X	A	A	X	A	A	B	X	X	X	X	A	A	B	X	X	X	X	X
GM17:3939329	X	X	X	X	X	X	X	X	A	B	X	A	X	X	A	X	B	X	A	X	B	A	A	X	X	X	X	X	B	X	X	A	A	X	A	A	B	X	X	X	X	A	A	B	X	X	X	X	X
GM17:4213729	X	X	X	X	X	X	X	X	A	B	X	A	X	X	A	X	B	X	A	X	B	A	A	X	X	X	X	X	B	X	X	A	A	X	A	A	B	X	X	X	X	A	A	X	X	X	X	X	X
GM17:4278220	X	X	X	X	X	X	X	X	A	B	X	A	X	X	A	X	B	X	A	X	B	A	A	X	X	X	X	X	B	X	X	A	A	X	A	A	B	X	X	X	X	A	A	X	X	X	X	X	X
GM17:4288141	X	X	X	X	X	X	X	X	A	B	X	A	X	X	A	X	B	X	A	X	B	A	A	X	X	X	X	X	B	X	X	A	A	X	A	A	B	X	X	X	X	A	A	X	X	X	X	X	X
GM17:4475625	X	X	X	X	X	X	X	X	A	B	X	A	X	X	A	X	B	X	A	X	B	A	A	X	X	X	X	X	X	X	X	A	A	X	A	A	B	X	X	X	X	A	A	X	X	X	X	X	X
GM17:4928431	X	X	X	X	X	X	X	X	A	B	X	A	X	X	A	X	B	X	A	X	B	A	A	X	X	X	X	X	X	X	X	A	A	X	A	A	B	X	X	X	X	A	A	X	X	X	X	X	X
GM17:5059637	X	X	X	X	X	X	X	X	A	B	X	A	X	X	A	X	B	X	A	X	B	A	A	X	X	X	X	X	X	X	X	A	X	X	A	A	B	X	X	X	X	A	A	X	X	X	X	X	X
GM17:5060217	X	X	X	X	X	X	X	X	A	B	X	A	X	X	A	X	B	X	A	X	B	A	A	X	X	X	X	X	X	X	X	A	X	X	A	A	B	X	X	X	X	A	A	X	X	X	X	X	X
GM17:5264271	X	X	X	X	X	X	X	X	A	B	X	A	X	X	A	X	B	X	A	X	B	A	A	X	X	X	X	X	X	X	X	A	X	X	A	A	B	X	X	X	X	A	A	X	X	X	X	X	X
GM17:5405549	X	X	X	X	X	X	X	X	A	B	X	A	X	X	A	X	B	X	A	X	B	A	A	X	X	X	X	X	X	X	X	A	X	X	A	A	B	X	X	X	X	A	A	X	X	X	X	X	X
GM17:5431473	X	X	X	X	X	X	X	X	A	X	X	A	X	X	A	X	B	X	A	X	B	A	A	X	X	X	X	X	X	X	X	A	X	X	A	A	A	A	X	X	X	X	A	X	X	X	X	X	B
GM17:7260313	X	X	X	B	X	X	X	X	A	X	X	A	X	X	A	X	X	X	A	X	B	A	A	B	X	X	X	X	X	X	X	A	X	X	X	A	A	A	X	A	X	X	A	X	X	X	X	X	B
GM17:7813728	A	X	X	B	X	X	X	X	A	X	A	A	X	X	A	A	X	X	A	X	B	A	A	B	X	X	X	X	X	X	A	A	X	X	X	A	A	A	B	A	X	X	A	X	X	X	B	X	B
GM17:7958883	A	X	X	B	X	X	X	X	A	X	A	A	X	X	A	A	X	X	A	X	B	A	A	B	X	X	X	X	X	X	A	A	X	X	X	A	A	A	B	A	X	X	A	X	X	X	B	X	B
GM17:8042370	A	X	X	B	X	X	X	X	A	X	A	A	X	X	A	A	X	X	A	X	B	A	A	B	X	X	X	X	X	X	A	A	X	X	X	A	A	A	B	A	X	X	A	X	X	X	B	X	B
GM17:8255165	A	X	X	B	X	X	X	X	A	X	A	A	X	X	A	A	X	X	A	X	B	A	A	B	X	X	X	X	X	X	A	A	X	X	X	A	A	A	B	A	X	X	X	X	X	X	B	X	B
GM17:9077708	A	X	X	B	X	A	X	X	A	X	A	A	X	X	A	A	X	X	A	X	B	A	X	B	X	B	X	A	X	X	A	A	A	X	X	A	A	A	B	A	X	X	X	X	X	X	B	X	B
GM17:9102933	A	X	X	B	X	A	X	X	A	X	A	A	X	X	A	A	X	X	A	X	B	A	X	B	X	B	X	A	X	B	A	A	A	X	X	A	A	A	B	A	X	X	X	X	X	X	B	X	B
GM17:9138333	A	X	X	B	X	A	X	X	A	X	A	A	X	X	A	A	X	X	A	X	B	A	X	B	X	B	X	A	X	B	A	A	A	X	X	A	A	A	B	A	X	X	X	X	X	X	B	X	B
GM17:9242669	A	X	X	B	X	A	X	X	A	X	X	A	X	X	A	A	A	X	A	X	B	A	X	B	X	B	X	A	X	B	A	A	A	X	X	A	A	A	B	A	X	X	X	X	X	X	B	X	B
GM17:9488230	A	X	X	B	X	A	X	X	A	X	X	A	X	X	X	A	A	X	A	X	B	A	X	B	X	B	X	A	X	B	A	A	A	X	X	A	A	A	B	A	X	X	X	X	X	X	B	X	B
GM17:10871828	X	X	X	B	X	A	X	X	A	X	X	A	X	X	X	X	A	X	A	X	B	A	X	B	X	B	X	A	B	B	A	A	A	X	X	A	A	A	X	A	X	X	X	X	X	X	B	X	B
GM17:11283559	X	X	X	B	X	A	X	X	A	X	X	A	X	X	X	X	A	X	A	X	B	A	X	B	X	B	X	A	B	B	A	A	A	X	X	A	A	A	X	A	X	X	X	X	X	X	B	X	B
GM17:12738323	X	X	X	B	X	A	X	X	A	X	X	A	X	B	X	X	A	X	A	X	B	X	X	B	X	B	X	A	B	B	A	A	B	X	X	A	X	B	X	A	X	B	X	X	X	X	B	X	X
GM17:12757397	X	X	X	B	X	A	X	X	A	X	X	A	X	B	X	X	A	X	A	X	B	X	X	B	X	B	X	A	B	B	A	B	B	X	X	A	X	B	X	A	X	B	X	X	X	X	B	X	X
GM17:22785683	X	B	X	A	X	X	X	X	A	X	X	A	X	B	X	X	A	X	A	X	X	X	X	B	X	X	X	A	B	X	A	B	B	X	X	X	X	B	X	A	A	B	X	X	X	B	X	X	X
GM17:24609079	X	B	X	A	X	X	A	X	A	X	X	A	X	B	X	X	A	X	A	X	X	X	X	B	X	X	X	A	B	X	A	B	B	X	X	X	X	B	X	A	A	B	X	X	X	B	X	X	X
GM17:31760140	X	B	X	A	X	X	A	X	A	X	X	A	X	B	X	X	A	X	A	X	X	X	X	B	X	X	X	A	B	X	A	B	B	X	A	X	X	B	X	B	A	B	X	X	X	B	X	X	X
GM17:31797213	X	B	X	A	X	X	A	X	A	X	X	A	X	B	X	X	A	X	A	X	X	X	X	B	X	X	X	A	B	X	A	B	B	X	A	X	X	B	X	B	A	B	X	X	A	B	X	X	X
GM17:31817568	X	B	X	A	X	X	A	X	A	X	X	A	X	B	X	X	A	X	A	X	X	X	X	B	X	X	X	A	B	X	A	B	B	X	A	X	X	B	X	B	A	B	X	X	A	B	X	X	X
GM17:32886923	X	B	X	A	X	X	A	X	A	X	X	A	X	B	X	X	A	X	A	X	X	X	X	B	X	X	X	A	B	X	A	B	B	X	A	X	X	B	X	B	A	B	X	X	A	B	X	X	X
GM17:33489362	X	B	X	A	X	X	A	X	A	X	X	A	X	B	X	X	A	X	A	X	X	X	X	B	X	X	X	A	B	X	A	B	B	X	A	X	X	B	X	B	A	B	X	X	A	B	X	X	X
GM17:34114127	X	B	X	A	X	X	A	X	A	X	X	A	X	B	X	X	A	X	A	X	X	X	X	B	X	X	X	A	B	X	A	B	B	X	A	X	X	B	X	B	A	B	X	X	A	B	X	X	X
GM17:34684468	X	B	X	A	X	X	A	X	A	X	X	A	X	B	X	X	A	X	A	X	X	X	X	B	X	X	X	A	B	X	A	B	B	X	A	X	X	B	X	B	A	B	X	X	A	B	X	X	X
GM17:34794118	X	B	X	A	X	X	A	X	A	X	X	A	X	B	X	X	A	X	A	X	X	X	X	B	X	X	X	A	B	X	A	B	B	X	A	X	X	B	X	B	A	B	X	X	A	B	X	X	X
GM17:34922176	X	B	X	A	X	X	A	X	A	X	X	X	X	B	X	X	A	X	A	X	X	X	X	B	X	X	X	A	B	X	A	B	B	X	A	X	X	B	X	B	A	B	X	X	A	B	X	X	X
GM17:36601605	X	B	X	A	X	X	A	X	A	X	X	X	B	B	X	X	A	X	A	B	X	X	X	B	X	X	X	A	B	X	A	B	B	X	A	X	X	B	X	B	A	B	X	X	A	X	X	X	X
GM17:36601695	X	B	X	A	X	X	A	X	A	X	X	X	B	B	X	X	A	X	A	B	A	X	X	B	X	X	X	A	B	X	A	B	B	X	A	X	X	B	X	B	A	B	X	X	A	X	X	X	X
GM17:36622766	X	B	X	A	X	X	A	X	A	X	X	X	B	B	X	X	A	X	A	B	A	X	X	B	X	X	X	A	B	X	A	B	B	X	A	X	X	B	X	B	A	B	X	X	A	X	X	X	X
GM17:36783658	X	B	X	A	X	X	A	X	A	X	X	X	B	B	X	X	A	X	A	B	A	X	X	B	X	X	X	A	B	X	A	B	B	X	A	X	X	B	X	B	A	B	X	X	A	X	X	X	X
GM17:37098186	X	B	X	A	X	X	X	X	A	X	X	X	B	B	X	X	A	X	A	B	A	X	X	B	X	X	X	A	B	X	A	B	B	X	A	X	X	B	X	B	A	B	X	X	A	X	X	X	X
GM17:37130099	X	B	X	A	X	X	X	X	A	X	X	B	B	B	X	X	A	X	A	B	A	X	X	B	X	X	X	A	B	X	A	B	B	X	A	X	X	B	X	B	A	B	X	X	A	X	X	X	X
GM17:37742401	X	B	X	A	X	X	X	X	A	X	A	B	B	B	B	X	A	X	A	B	A	X	X	B	X	X	X	A	B	B	A	B	B	X	A	X	X	B	X	B	A	B	X	X	A	X	X	X	X
GM17:37781272	X	B	X	A	X	X	X	X	A	X	A	B	B	B	B	X	A	X	A	B	A	X	X	B	X	X	X	A	B	B	A	B	B	X	A	X	X	B	X	B	A	B	X	X	A	X	X	X	X
GM17:37806259	X	B	X	A	X	X	X	X	A	X	A	B	B	B	B	X	A	X	A	B	A	X	X	B	X	X	X	A	B	B	A	B	B	X	A	X	X	B	X	B	A	B	X	X	A	X	X	X	X
GM17:37875314	X	B	X	A	X	X	X	X	A	X	A	B	B	B	B	X	A	X	A	B	A	X	X	B	X	X	X	A	B	B	A	B	B	X	A	X	X	B	X	B	A	B	X	X	A	X	X	X	X
GM17:38074662	X	B	X	A	X	X	X	X	A	X	A	B	B	B	B	X	A	X	A	X	A	X	X	B	X	X	X	A	B	B	A	B	B	X	A	X	X	B	X	B	A	B	X	X	A	X	X	X	X
GM17:38153872	X	B	X	A	X	X	X	X	A	X	A	B	B	B	B	X	A	X	A	X	A	X	X	B	X	X	X	A	B	B	A	B	B	X	A	X	X	B	X	B	A	B	X	X	A	X	X	B	X
GM17:38271100	X	B	X	A	X	X	X	X	A	X	A	B	B	B	B	X	A	A	A	X	A	X	A	B	X	X	X	A	B	B	A	B	B	X	A	X	X	B	X	B	A	B	X	X	A	X	X	B	X
GM17:38408508	X	B	X	A	X	X	X	X	A	X	A	B	B	X	B	X	A	A	A	X	A	X	A	X	X	X	X	A	B	B	A	B	B	X	A	X	X	B	X	B	A	B	X	X	A	X	X	B	X
GM17:38631577	X	B	X	A	X	X	X	X	A	X	A	B	B	X	B	X	A	A	A	X	A	X	A	X	X	X	X	A	B	B	A	B	B	X	A	X	X	B	B	B	A	B	X	X	A	X	X	B	X
GM17:38638643	X	B	X	A	X	X	X	X	A	X	A	B	B	X	B	B	A	A	A	X	A	A	A	X	X	X	X	A	B	B	A	B	B	X	A	X	X	B	B	B	A	B	X	X	A	X	X	B	X
GM17:38656525	X	B	X	A	X	X	X	X	A	X	A	B	B	X	B	B	A	A	A	X	A	A	A	X	X	X	X	A	B	B	A	B	B	X	A	X	X	A	B	B	A	B	X	X	A	X	X	B	X
GM17:38656687	X	B	X	X	X	X	X	X	A	X	A	B	B	X	B	B	A	A	A	X	A	A	A	X	X	X	X	A	B	B	A	B	B	X	A	X	X	A	B	B	A	B	X	X	X	X	X	B	X
GM17:38929104	X	B	X	X	X	B	X	X	A	X	A	B	B	X	B	B	A	A	A	X	A	A	A	X	X	X	X	A	B	B	A	B	B	X	A	X	X	A	B	B	A	B	X	X	X	X	X	X	X
GM17:38944903	X	B	X	X	X	B	X	X	A	X	A	B	B	X	B	B	A	A	A	X	A	A	A	X	X	X	X	A	B	B	A	B	B	X	A	X	X	A	B	B	A	B	X	X	X	X	X	X	X
GM17:38944930	X	B	X	X	X	B	X	X	A	X	A	B	B	X	B	B	A	A	A	X	A	A	A	X	A	X	X	A	B	B	A	B	B	X	A	X	X	A	B	B	A	B	X	X	X	X	X	X	X
GM17:38946963	X	B	X	X	X	B	X	X	A	X	A	B	B	X	B	B	A	A	A	X	A	A	A	X	A	X	X	A	B	B	A	B	B	X	A	X	X	A	B	B	A	B	X	X	X	X	X	X	X
GM17:39180102	X	B	X	X	X	B	X	X	A	A	A	B	B	X	B	B	A	A	A	X	A	A	A	X	A	X	B	A	B	B	A	B	B	X	A	X	X	A	B	B	A	B	X	X	X	X	A	X	X
GM17:39263187	X	B	X	X	X	B	X	X	A	A	A	B	B	X	B	B	A	A	A	X	A	A	A	X	A	X	B	A	B	B	A	B	B	X	A	X	X	A	B	B	A	B	X	X	X	X	A	X	X
GM17:39433946	X	B	X	X	X	B	X	X	X	A	A	B	B	X	B	B	A	A	A	X	A	A	A	X	A	X	B	A	B	B	A	X	B	X	A	X	X	A	X	B	A	B	X	X	X	X	A	X	X
GM17:39603730	X	B	X	X	X	B	X	X	X	A	A	B	B	X	B	X	A	A	A	X	A	A	A	X	A	X	B	A	B	B	A	X	X	X	A	X	X	A	X	B	A	B	X	X	X	X	A	X	X
GM17:39652409	X	B	X	X	X	B	X	X	X	A	A	B	B	X	B	X	A	A	A	X	A	A	A	X	A	X	B	X	B	B	A	X	X	X	A	X	X	A	X	B	A	B	X	X	X	X	A	X	X
GM17:39738603	X	B	X	X	X	B	X	X	X	A	A	B	B	X	B	X	A	A	A	X	A	A	A	X	A	X	B	X	B	B	A	X	X	X	A	X	X	A	X	B	A	B	X	X	X	X	A	X	X
GM17:39745942	X	B	X	X	X	B	X	X	X	A	A	B	B	X	B	X	A	A	A	X	A	A	X	X	A	X	B	X	B	B	A	X	X	X	A	X	X	A	X	B	A	B	X	X	X	X	A	X	X
GM17:40059506	X	B	X	X	X	B	X	X	X	A	A	B	B	X	B	X	A	A	A	X	A	A	X	X	A	X	B	X	B	B	A	X	X	X	A	X	X	A	X	B	A	B	B	X	B	X	A	X	X
GM17:40153761	X	B	X	X	X	B	X	B	X	A	A	B	B	X	B	X	A	A	A	X	A	A	X	X	A	X	B	X	B	B	A	X	X	X	A	X	X	A	X	B	A	B	B	X	B	X	A	X	X
GM17:40234459	X	B	X	X	X	B	X	B	X	A	A	B	B	X	B	X	A	A	A	X	A	A	X	X	A	X	B	X	B	B	A	X	X	X	A	X	X	A	X	B	A	B	B	X	B	X	A	X	X
GM17:40269918	X	B	X	X	X	B	X	B	X	A	A	B	B	X	B	X	A	A	A	X	A	A	X	X	A	X	B	X	B	B	A	X	X	X	A	X	X	A	X	B	A	B	B	X	B	X	A	X	A
GM17:40701207	X	B	X	X	X	B	X	B	X	A	A	B	B	X	B	X	A	A	A	X	A	A	X	X	A	X	B	X	B	B	A	X	X	A	A	X	X	A	X	B	A	B	B	X	B	X	A	X	A
GM17:40757108	X	B	X	X	X	B	X	B	X	A	A	B	B	X	B	X	A	A	A	X	A	A	X	X	A	X	B	X	B	B	A	X	X	A	A	X	X	A	X	B	A	B	B	X	B	X	A	X	A
GM17:40847339	X	B	X	X	X	B	X	B	X	A	A	B	B	X	B	X	A	A	A	X	A	A	X	X	A	X	B	X	B	B	A	X	X	A	A	X	X	A	X	B	A	B	B	X	B	X	A	X	A
GM17:41149771	X	B	X	X	X	B	X	B	X	A	A	B	B	X	B	X	A	A	A	X	A	A	X	X	A	X	B	X	B	B	A	X	A	A	A	X	X	A	X	B	A	B	B	X	B	X	A	X	A
GM17:41275983	X	B	X	X	X	B	X	B	X	A	X	B	A	X	B	X	A	A	A	X	A	A	X	X	A	X	B	X	B	B	A	X	A	A	A	X	X	A	X	B	A	B	B	X	B	X	A	X	A
GM17:41276153	X	B	X	X	X	B	X	B	A	A	X	B	X	X	B	A	A	A	A	X	A	A	X	A	A	B	B	X	B	B	A	X	A	A	A	X	X	A	X	B	A	B	B	A	B	X	A	X	A
GM17:41448081	X	X	X	X	X	B	X	B	X	A	X	B	X	X	B	X	A	A	A	X	A	A	X	X	A	A	B	X	B	B	A	X	A	A	X	X	X	A	X	B	A	B	B	X	B	X	A	X	A
GM17:41474373	B	B	B	X	X	B	X	B	X	A	X	B	X	X	B	X	A	A	A	X	A	A	X	B	A	A	B	B	B	B	A	X	A	A	X	X	B	A	X	B	A	B	B	B	B	B	A	X	A
GM17:41474837	B	A	B	X	X	B	X	B	X	A	A	B	A	B	B	X	A	A	A	X	A	A	X	X	A	A	B	B	B	B	A	X	A	A	X	X	B	A	B	B	A	B	B	X	B	X	A	A	A
GM17:41616826	X	X	X	X	X	B	X	B	X	A	X	B	X	X	B	X	A	A	A	X	A	A	X	X	A	A	B	X	B	B	A	X	A	A	X	X	X	A	X	B	A	B	B	X	B	B	A	X	A
GM18:102441	A	B	X	X	X	X	X	B	A	X	A	B	X	B	A	X	X	X	B	A	B	X	B	X	X	X	X	A	X	A	A	A	A	X	A	X	X	B	B	X	X	A	A	A	A	X	A	A	X
GM18:139771	A	B	X	X	X	X	X	B	A	X	X	B	X	B	A	X	X	X	B	A	B	X	B	X	X	X	X	A	X	A	A	A	A	X	A	X	X	B	B	X	X	A	A	A	A	X	A	A	X
GM18:143167	A	B	X	X	X	X	X	B	A	X	X	B	X	B	A	X	X	X	B	A	B	X	B	X	X	X	X	A	X	A	A	A	A	X	A	X	A	B	B	A	X	A	A	A	A	X	A	A	X
GM18:144692	A	B	X	X	X	X	X	B	A	X	X	B	X	B	A	X	X	X	B	A	B	X	B	X	X	X	X	A	X	A	A	A	A	X	A	X	X	B	B	X	X	A	A	A	A	X	A	A	X
GM18:232001	A	B	X	X	X	X	X	B	A	X	X	B	X	B	A	X	X	X	B	A	B	X	B	X	X	X	X	A	X	A	A	A	A	X	A	X	X	B	B	X	X	A	A	A	A	X	A	A	X
GM18:251829	A	B	X	X	X	X	X	B	A	X	X	B	X	B	A	A	X	A	B	A	B	X	B	X	X	X	X	A	X	A	A	A	A	X	A	X	X	B	B	X	X	A	A	A	A	X	A	A	X
GM18:259462	A	B	X	A	A	X	X	B	A	X	X	B	X	B	A	A	X	A	B	A	B	X	B	X	X	X	X	A	X	A	A	A	A	X	A	X	X	B	B	X	X	A	A	A	A	X	A	A	X
GM18:317832	A	B	X	A	A	X	X	B	A	X	X	B	X	B	A	A	X	A	B	A	B	X	B	X	X	X	X	A	X	A	A	A	A	X	A	X	X	B	B	X	X	A	A	A	A	X	A	A	X
GM18:328724	A	B	X	A	A	X	X	B	A	X	X	B	X	B	A	A	X	A	B	A	B	X	B	X	X	X	X	A	X	A	A	A	A	X	A	X	X	B	B	X	X	A	A	A	A	X	A	A	X
GM18:464883	A	B	X	A	A	X	X	B	A	X	X	B	X	B	A	A	X	A	B	A	B	X	B	X	X	X	X	A	X	A	A	A	A	X	A	X	X	B	B	X	X	A	A	A	A	X	A	A	X
GM18:915738	A	B	X	A	A	X	X	X	A	X	X	B	X	B	A	A	X	A	X	A	B	X	B	X	X	X	X	A	X	A	A	A	A	X	A	X	X	B	B	X	X	A	A	A	A	X	A	A	X
GM18:1022333	A	B	X	A	A	X	X	X	A	X	X	B	X	B	A	A	X	A	X	A	B	X	B	X	X	X	X	A	X	A	A	A	A	A	A	X	X	B	B	X	X	A	A	A	A	X	A	A	X
GM18:1338387	A	B	X	A	A	X	X	X	A	X	X	B	X	B	A	A	X	A	X	A	B	X	B	A	X	X	X	A	X	A	A	A	A	X	A	X	X	B	B	X	X	A	A	A	A	X	A	A	X
GM18:1418228	A	B	X	A	A	X	X	X	A	X	X	B	X	B	A	A	X	A	X	A	B	X	B	A	X	X	X	A	A	A	A	A	A	X	A	X	X	B	B	X	X	A	A	A	A	X	A	A	X
GM18:1434182	A	B	X	A	A	X	X	X	A	X	X	B	X	B	A	A	X	A	X	A	B	X	B	A	X	X	X	A	A	A	A	A	A	X	A	X	X	B	B	X	X	A	A	A	A	X	A	A	X
GM18:1911667	A	B	X	A	A	X	X	X	A	X	X	B	X	B	A	X	X	A	X	A	X	X	B	A	X	X	X	A	A	A	A	A	A	X	A	X	X	B	B	X	X	X	A	A	A	X	A	A	X
GM18:1935386	A	B	X	A	A	X	X	X	A	X	X	B	X	B	A	X	X	A	X	A	X	A	B	A	X	X	X	A	A	A	A	A	A	X	A	X	X	B	B	X	X	X	A	A	A	X	A	A	X
GM18:2073999	A	B	X	A	A	X	X	X	A	X	X	B	X	B	A	X	X	A	X	A	X	A	B	A	X	X	X	A	A	A	A	A	A	X	A	X	X	B	B	X	X	X	A	A	A	X	A	A	X
GM18:2419155	A	B	X	A	A	X	X	X	A	X	X	B	X	B	A	X	X	A	X	A	X	A	B	A	X	X	X	A	A	A	A	A	A	X	A	X	X	B	B	X	B	X	A	A	A	B	A	A	X
GM18:2460215	A	B	X	A	A	X	X	X	A	X	X	B	X	B	A	X	X	A	X	A	X	A	B	A	X	X	X	A	A	A	A	A	A	X	A	X	X	B	B	X	B	X	A	A	A	B	A	A	X
GM18:3091546	A	B	X	A	A	X	X	X	A	A	X	B	B	B	A	X	X	A	X	A	X	A	B	A	X	X	X	A	A	A	A	A	A	X	X	X	X	B	B	X	B	X	A	A	A	B	A	A	X
GM18:3183376	A	B	X	B	A	X	X	X	A	A	X	B	B	B	A	A	X	A	X	A	X	A	B	A	X	X	X	A	A	A	A	A	A	X	X	X	X	B	B	X	B	X	A	A	A	B	A	A	X
GM18:3215587	A	B	X	B	A	X	X	X	A	A	X	B	B	B	A	A	X	A	X	X	X	A	B	A	X	X	X	A	A	A	X	A	A	X	X	X	X	B	B	X	B	X	A	A	A	B	A	A	X
GM18:3222446	A	B	X	B	A	X	X	X	A	A	X	B	B	B	A	A	X	A	X	X	X	X	B	A	X	X	X	X	A	A	X	A	A	X	X	X	X	B	B	X	B	X	A	A	A	B	A	X	X
GM18:5009421	A	X	X	B	A	X	X	X	A	A	B	B	B	X	B	A	X	A	B	X	X	X	X	A	X	X	X	X	A	X	X	A	A	X	X	B	X	X	B	X	B	X	A	B	A	B	A	X	X
GM18:5017071	A	X	X	B	A	X	A	X	A	A	B	B	B	X	B	A	X	A	B	X	X	X	X	A	X	X	X	X	A	X	X	A	A	X	X	B	X	X	B	X	B	X	A	B	A	X	A	X	X
GM18:5024959	A	X	X	B	A	X	A	X	A	A	B	B	B	X	B	A	X	A	B	X	X	X	X	A	X	X	X	X	A	X	X	A	A	X	X	B	X	X	B	X	B	X	A	B	A	X	A	X	X
GM18:5036060	A	X	X	B	A	X	A	X	A	A	B	B	B	X	B	A	X	A	B	X	X	X	X	A	X	X	X	X	A	X	X	A	A	X	X	B	X	X	B	X	B	X	A	B	A	X	A	X	X
GM18:5209284	A	X	B	B	B	X	A	X	A	A	B	B	B	X	B	A	X	A	B	X	X	X	X	A	X	X	X	X	A	X	X	A	A	X	X	B	X	X	B	X	B	X	A	B	A	X	A	X	X
GM18:5212792	A	X	B	B	B	X	A	X	A	A	B	B	B	X	B	A	X	A	B	X	X	X	X	A	X	X	X	X	A	X	X	A	A	X	X	B	X	X	B	X	B	X	A	B	A	X	A	X	X
GM18:5966989	A	X	B	B	B	X	A	A	A	A	B	B	B	X	B	A	X	A	B	X	X	X	X	A	X	X	X	B	A	X	X	X	X	X	X	B	X	X	B	B	B	X	A	B	A	X	A	X	X
GM18:6719853	X	X	B	B	B	X	A	A	A	X	B	B	B	X	B	A	X	A	B	X	X	X	X	A	X	X	X	B	A	X	X	X	X	X	X	B	X	X	B	B	X	X	A	B	A	X	A	X	X
GM18:6923940	X	X	B	B	B	X	A	A	A	X	B	X	B	X	B	A	X	A	B	X	X	X	X	A	X	X	X	B	A	X	X	X	X	X	X	B	B	X	B	B	X	X	A	B	A	X	A	X	X
GM18:7022373	X	X	B	B	B	X	A	A	A	X	B	X	B	X	B	A	X	A	B	X	X	X	X	A	X	X	X	B	A	X	X	X	X	X	X	B	B	X	B	B	X	X	A	B	A	X	A	X	X
GM18:7124991	X	X	B	B	B	X	A	A	A	X	B	X	B	X	B	A	X	A	B	X	X	X	X	A	X	X	X	B	A	X	X	X	X	X	X	B	B	X	B	B	X	X	A	B	A	X	A	X	X
GM18:7133465	X	X	B	B	B	X	A	A	A	X	B	X	B	X	B	A	X	A	B	X	X	X	X	A	X	X	X	B	A	X	X	X	X	X	X	B	B	X	B	B	X	X	A	B	A	X	A	X	X
GM18:7465904	X	X	B	B	B	X	A	A	A	X	B	X	B	X	B	A	X	A	B	X	X	X	X	A	X	X	X	B	A	X	X	X	X	X	X	B	B	X	B	B	X	X	A	B	A	X	A	X	X
GM18:7578129	X	X	B	B	B	X	A	A	A	X	B	X	B	X	B	A	X	A	B	X	X	X	X	A	X	X	X	B	A	X	X	X	X	X	X	X	B	X	B	B	X	X	A	B	A	X	A	X	X
GM18:8515495	X	X	B	B	B	X	A	A	A	X	B	X	B	X	B	A	X	A	B	X	X	X	X	A	X	X	X	B	A	X	X	X	X	X	X	X	B	X	B	B	X	X	A	B	A	X	A	X	X
GM18:9105976	X	X	B	B	B	X	A	A	A	X	B	X	B	X	B	A	X	A	B	X	X	X	X	A	B	X	X	B	B	X	X	X	X	X	X	X	B	X	B	B	X	X	A	B	A	X	A	X	X
GM18:9297911	X	X	B	B	B	X	A	A	A	X	B	X	B	X	B	X	X	A	B	X	X	X	X	A	B	X	X	B	B	X	X	X	X	X	X	X	B	X	B	B	X	X	A	B	A	X	A	X	X
GM18:16961780	X	X	X	X	X	X	A	A	A	B	B	X	B	B	X	X	X	A	B	B	X	X	X	A	B	X	X	B	B	X	X	X	X	X	X	X	B	X	B	B	X	X	A	B	A	X	A	X	B
GM18:18561337	X	X	X	X	X	X	X	A	A	B	B	X	B	B	X	X	X	A	B	B	X	X	X	A	B	X	X	B	B	X	X	X	X	X	X	X	B	A	B	B	X	X	A	B	X	X	A	A	B
GM18:23388188	X	X	X	X	X	X	X	A	X	B	B	X	X	B	X	X	X	A	B	B	X	X	X	A	B	X	X	B	B	X	X	A	X	X	X	X	B	A	B	B	X	X	A	B	X	X	A	A	B
GM18:28991735	X	X	X	X	X	X	X	A	X	B	B	X	X	B	X	X	X	A	B	B	X	X	X	A	B	X	X	B	B	X	X	A	X	X	X	X	B	A	B	B	X	X	A	B	X	X	A	A	B
GM18:28995258	X	X	X	X	X	X	X	A	X	B	B	X	X	B	X	X	X	A	B	B	X	X	X	A	B	X	X	B	B	X	X	A	X	X	X	X	B	A	B	B	X	X	A	B	X	X	A	A	B
GM18:29181307	X	X	X	X	X	X	X	A	X	B	B	X	X	B	X	X	X	A	X	B	X	X	X	A	B	X	X	B	B	X	X	A	X	X	X	X	B	A	B	B	X	X	A	B	X	X	A	A	B
GM18:30388018	X	X	X	X	X	X	X	A	X	B	B	X	X	B	X	X	X	A	X	B	X	X	X	A	B	X	X	B	B	X	X	A	X	X	X	X	B	A	B	B	X	X	A	B	X	X	A	A	B
GM18:35376445	X	X	X	X	X	X	X	A	X	B	B	X	X	B	X	X	X	X	X	B	X	X	X	A	B	X	X	B	B	X	X	A	X	X	X	X	B	A	B	B	X	X	A	B	X	X	A	A	B
GM18:36157095	X	X	X	X	X	X	X	A	X	B	B	X	X	B	X	X	X	X	A	B	X	X	X	A	B	X	X	B	B	X	X	A	X	X	X	X	B	A	B	B	X	X	A	B	X	X	A	A	B
GM18:38559660	X	X	X	X	X	X	X	A	X	B	B	X	X	B	X	X	X	X	A	B	X	X	X	A	B	X	X	B	B	X	X	A	X	X	X	X	B	A	B	B	X	X	A	B	X	X	A	A	B
GM18:41263830	X	X	X	X	X	X	X	A	X	B	B	X	X	B	X	X	X	X	A	B	X	X	X	A	B	X	X	B	B	X	X	A	X	X	X	A	B	A	B	B	X	X	A	B	X	X	A	A	B
GM18:42040720	X	X	X	X	X	X	X	A	X	B	B	X	X	X	X	X	X	X	A	B	X	X	X	A	B	X	X	B	B	X	X	A	X	X	X	A	B	A	B	B	X	X	A	B	X	X	A	A	B
GM18:42241522	X	X	X	X	X	X	X	A	X	B	B	X	X	X	X	X	X	X	A	B	X	X	X	A	B	X	X	B	B	X	X	A	X	X	X	A	B	A	B	B	X	X	A	B	X	X	A	A	B
GM18:43061129	X	X	X	X	X	X	X	A	A	B	B	X	X	X	X	X	X	X	A	B	X	X	X	A	B	X	X	B	B	X	X	A	X	X	X	A	B	A	B	B	X	X	A	B	X	X	A	A	B
GM18:43063284	X	X	X	X	X	X	X	A	A	B	B	X	X	X	X	X	X	X	A	B	X	X	X	A	B	X	X	B	B	X	X	A	X	X	X	A	B	A	B	B	X	X	A	B	X	X	A	A	B
GM18:43405348	X	X	X	X	B	X	X	A	A	B	B	X	X	X	X	X	X	X	A	B	X	X	X	A	B	X	X	B	B	X	X	A	X	X	X	A	B	X	B	B	X	X	A	B	X	X	A	A	B
GM18:46231330	X	X	X	X	B	X	X	A	X	B	B	X	X	X	X	X	X	X	A	B	X	X	X	A	B	X	X	B	B	X	X	A	X	X	X	A	B	X	X	B	X	X	A	B	X	X	A	A	B
GM18:46709325	X	X	X	X	B	X	X	A	X	B	B	X	X	X	X	X	X	X	A	X	X	X	X	X	B	X	X	B	B	X	X	A	X	X	X	A	B	X	X	B	X	X	A	B	X	X	A	A	B
GM18:46965460	X	X	X	X	B	X	X	A	X	B	B	X	X	X	X	X	X	X	A	X	X	A	X	X	B	X	X	B	B	X	X	A	X	X	X	A	B	X	X	B	X	X	X	B	X	X	A	A	B
GM18:47043209	X	X	X	X	B	X	X	A	X	B	B	X	X	X	X	X	X	X	A	X	X	A	X	X	B	X	X	B	B	X	X	A	X	X	X	A	B	X	X	B	X	X	X	B	X	X	A	A	B
GM18:48253133	X	X	X	X	B	X	X	A	X	B	B	X	X	X	X	X	X	X	A	X	X	A	X	X	B	X	X	B	B	X	X	A	X	X	B	A	B	X	X	B	X	B	X	B	X	X	A	A	B
GM18:48396802	X	X	X	X	B	X	X	A	X	B	B	X	X	X	X	X	X	X	A	X	X	A	X	X	B	X	X	B	B	X	X	A	X	X	B	A	B	X	X	B	X	B	X	B	X	X	A	A	B
GM18:48903993	X	X	X	X	B	X	X	A	X	B	B	X	X	X	X	X	X	X	A	X	X	A	X	X	B	X	X	B	B	X	X	A	X	X	B	A	B	X	X	B	X	B	X	B	X	X	A	A	B
GM18:49342270	X	X	A	X	B	X	X	A	X	B	B	X	X	X	X	B	X	X	A	X	X	A	X	X	B	X	X	B	B	X	X	A	X	A	B	A	B	X	X	B	X	B	X	B	X	X	A	A	B
GM18:49342363	X	X	A	X	B	X	X	A	X	B	B	X	X	X	X	B	X	X	A	X	X	A	X	X	B	X	X	B	B	X	X	A	X	A	B	A	B	X	X	B	X	B	X	B	X	X	A	A	B
GM18:49405397	X	X	A	X	B	X	X	A	X	X	B	X	X	X	X	B	X	X	A	X	X	A	X	X	B	X	X	B	B	X	X	A	X	A	B	A	B	X	X	B	X	B	X	B	X	X	A	A	B
GM18:49792236	X	X	A	X	B	X	X	A	X	X	B	X	X	X	X	B	X	X	A	X	B	A	X	X	B	X	X	B	B	X	X	A	X	A	B	A	B	X	X	B	X	B	X	B	B	X	A	A	B
GM18:50126802	X	X	A	A	X	X	X	A	X	X	B	X	X	X	X	B	X	X	A	X	B	A	X	X	B	X	X	B	B	X	X	A	X	A	B	X	B	X	X	B	X	B	X	B	B	X	A	A	B
GM18:50405583	X	X	A	A	X	X	X	A	X	X	B	X	X	X	X	B	X	X	A	X	B	A	X	X	B	X	X	B	B	X	X	A	X	A	B	X	B	X	X	B	X	B	X	B	B	X	A	A	B
GM18:50504563	X	X	A	A	X	X	X	A	X	X	B	X	X	X	X	B	X	X	A	X	B	A	X	X	B	X	X	B	B	X	X	A	X	A	B	X	B	X	X	B	X	B	X	B	B	X	A	A	B
GM18:52537019	X	A	A	A	X	B	X	A	X	X	B	X	X	X	X	B	X	X	A	X	B	A	X	X	X	X	X	B	B	X	X	A	B	A	B	X	B	X	X	B	X	B	B	B	B	B	A	A	B
GM18:52562279	X	A	A	A	X	B	X	A	A	X	B	X	X	X	X	B	X	X	A	X	B	A	A	X	X	X	X	B	B	X	X	A	B	A	B	X	B	X	X	B	A	B	B	B	B	B	A	A	B
GM18:52573168	X	A	A	A	X	B	X	A	A	X	B	X	X	X	X	B	X	X	A	X	B	A	A	X	X	A	X	B	B	X	X	A	B	A	B	X	B	X	X	A	A	B	B	B	B	B	A	A	B
GM18:52713157	X	A	A	A	X	B	X	A	A	X	B	X	X	X	X	B	X	X	A	X	B	A	A	X	X	A	X	B	B	X	A	A	B	A	B	X	B	X	X	A	A	B	B	B	B	B	A	A	B
GM18:52741135	X	A	A	A	X	B	X	A	A	X	B	X	X	X	X	B	X	X	A	X	B	A	A	X	X	A	X	B	B	X	A	A	B	A	B	X	B	A	X	A	A	B	B	B	B	B	A	A	B
GM18:53152970	X	A	A	A	X	B	X	A	A	X	B	X	X	X	X	B	X	X	A	X	B	A	A	X	X	A	X	B	B	X	A	A	B	X	B	X	B	A	X	A	A	B	B	B	B	B	A	A	B
GM18:53190014	X	A	A	A	X	B	X	A	A	X	B	X	X	X	X	B	X	X	A	X	B	A	A	X	X	A	X	B	B	X	A	A	B	X	B	X	B	A	X	A	A	B	B	B	B	B	A	A	B
GM18:53313770	X	A	A	A	X	B	X	A	A	X	B	X	X	X	X	B	X	X	A	X	B	A	A	X	X	A	X	B	B	X	A	A	B	X	B	X	B	A	X	A	A	B	B	B	B	B	A	A	B
GM18:53423442	X	A	A	A	X	B	X	A	A	X	B	X	X	X	X	B	X	X	A	X	B	A	A	X	X	A	X	B	B	X	A	A	B	X	B	X	B	A	X	A	A	B	B	B	B	B	A	A	B
GM18:53502080	X	A	A	A	X	B	X	A	A	X	B	X	X	X	X	B	X	X	A	X	B	A	A	X	X	A	X	B	B	X	A	A	B	X	B	X	B	A	X	A	A	B	B	B	B	B	A	A	B
GM18:53564459	X	A	A	A	X	B	X	A	A	X	B	X	X	X	X	B	X	X	A	X	B	A	A	X	X	A	X	B	B	X	A	A	B	X	B	X	B	A	X	A	A	B	B	B	B	B	A	A	B
GM18:53743245	X	A	A	A	X	B	X	A	A	X	B	X	X	X	X	B	X	X	A	X	B	X	A	X	X	A	X	B	B	X	A	A	B	X	B	X	B	A	X	A	A	B	B	X	B	B	A	A	B
GM18:53971664	X	A	A	A	X	B	X	A	A	X	B	X	X	X	X	X	X	X	A	X	B	X	A	X	X	A	X	X	B	X	A	A	B	X	B	X	B	A	X	A	A	B	B	X	B	B	A	A	B
GM18:54136029	X	A	A	A	X	B	X	A	A	X	B	X	X	X	B	X	X	X	A	X	B	X	A	X	X	A	X	X	B	X	A	A	B	X	B	X	B	A	X	A	A	B	B	X	B	B	A	A	B
GM18:54520015	X	A	A	A	X	B	X	A	A	X	B	X	X	X	B	X	X	X	A	X	B	X	A	X	X	A	X	X	B	X	A	A	B	X	B	X	B	A	X	A	A	B	B	X	B	B	A	A	B
GM18:54702688	X	A	A	A	X	B	X	A	A	X	B	X	X	X	B	X	X	X	A	X	B	X	A	X	X	A	X	X	B	X	A	A	B	X	B	X	B	A	X	A	A	B	B	X	B	B	A	A	B
GM18:54905562	X	A	A	A	X	B	X	A	A	X	B	X	X	X	B	X	X	X	A	X	B	X	A	X	X	A	X	X	B	X	A	A	B	X	B	X	B	A	X	A	A	B	B	X	B	B	A	A	B
GM18:55241144	X	A	A	A	X	X	X	A	A	X	B	X	X	X	B	X	X	X	A	X	B	X	A	X	X	A	X	X	B	A	A	A	B	X	B	X	B	A	X	A	A	B	B	X	B	B	A	A	B
GM18:55248292	X	A	A	A	X	X	X	A	A	X	B	X	X	X	B	X	X	X	A	X	B	X	A	X	X	A	A	X	B	A	A	A	B	X	B	X	B	A	X	A	A	B	B	X	B	B	A	A	B
GM18:55439218	X	A	A	A	X	X	X	A	A	X	B	X	X	X	B	X	X	X	A	X	B	X	A	X	X	A	A	X	B	A	A	A	B	X	B	X	B	A	X	A	A	B	B	X	B	B	A	A	B
GM18:55791677	X	A	A	A	X	X	X	A	A	X	B	X	X	X	B	X	X	X	A	X	B	X	A	X	X	A	A	X	B	A	A	A	X	X	B	X	B	A	X	A	A	B	B	X	B	B	A	A	B
GM18:55913929	X	A	A	A	X	X	X	A	A	X	B	X	X	X	B	X	X	X	A	X	B	X	A	X	X	A	A	X	B	A	A	A	X	X	B	X	X	A	X	A	A	B	B	X	B	B	A	A	B
GM18:56346730	X	A	A	A	X	X	X	A	A	X	B	A	X	X	B	X	X	X	A	X	X	B	A	X	X	A	A	B	B	A	A	A	X	X	X	X	X	A	X	A	A	B	B	X	X	B	X	A	B
GM18:56363161	X	A	A	A	X	X	X	A	A	X	B	A	X	X	B	X	X	X	A	X	X	B	A	X	X	A	A	B	B	A	A	A	X	X	X	X	X	A	X	A	A	B	B	X	X	B	X	A	B
GM18:56412205	X	A	A	A	X	X	X	A	A	X	X	A	X	X	B	X	X	X	A	X	X	B	A	X	X	A	A	B	B	A	A	A	X	X	X	X	X	A	X	A	A	B	B	X	X	B	X	A	B
GM18:56553831	X	A	A	A	X	X	X	A	A	X	X	A	X	X	B	X	X	X	A	X	X	B	A	X	X	A	A	B	B	A	A	A	X	X	X	X	X	A	X	A	A	B	B	X	X	B	X	A	B
GM18:56707146	X	A	A	A	X	X	X	A	A	X	X	A	X	X	B	X	X	X	A	X	X	B	A	X	X	A	A	B	B	A	A	A	X	X	X	X	X	A	X	A	A	B	B	X	X	B	X	A	B
GM18:57072739	X	A	A	A	X	X	X	A	A	X	X	A	X	X	B	X	X	X	X	B	X	B	A	X	X	A	A	B	B	A	A	A	X	X	X	X	X	A	X	A	A	B	B	X	X	B	X	A	B
GM18:57553741	X	A	A	A	X	X	X	A	A	X	X	A	X	X	B	X	X	X	X	B	X	B	A	B	X	A	A	B	B	A	A	A	X	X	X	X	X	A	X	A	A	B	B	X	X	B	X	A	B
GM18:57745955	X	A	A	A	X	X	X	A	A	X	X	A	X	X	B	X	X	X	X	B	X	B	A	B	X	A	A	B	B	A	A	A	A	X	X	X	X	A	X	A	A	B	B	X	X	B	X	A	B
GM18:57772007	X	A	A	X	X	X	X	A	A	X	X	A	X	X	B	X	X	X	X	X	X	B	A	B	X	A	A	B	B	A	A	A	A	X	X	X	X	A	X	A	A	B	B	X	X	B	X	A	B
GM18:57794941	X	A	A	X	X	X	X	A	A	X	X	A	X	X	B	X	X	X	X	X	X	B	A	B	X	A	A	B	B	A	A	A	A	X	X	X	X	A	X	A	A	B	B	X	X	B	X	A	B
GM18:57935633	X	A	A	X	X	B	A	A	A	X	X	A	X	X	B	B	X	B	X	X	X	B	A	B	X	A	A	B	B	A	A	A	A	X	X	X	X	A	X	A	A	B	B	A	B	B	B	A	B
GM18:57979154	X	A	A	X	X	A	X	A	A	X	A	A	X	X	B	X	X	A	A	B	X	B	A	B	X	A	A	B	B	A	A	A	A	X	X	X	X	A	X	A	A	B	B	X	B	B	X	A	B
GM18:57999045	B	A	A	B	X	X	X	A	A	X	X	A	X	X	B	X	X	X	B	B	X	B	A	B	X	A	A	B	B	A	A	A	A	X	X	X	X	A	X	A	A	B	B	X	B	B	X	A	B
GM19:2053805	X	B	X	X	X	A	B	B	A	B	B	X	B	B	X	A	B	A	B	X	A	X	X	X	B	B	B	A	X	B	B	X	A	B	X	X	X	X	X	X	A	X	X	A	A	B	X	A	A
GM19:2053933	X	B	X	X	X	A	B	B	A	B	B	X	B	B	X	A	B	A	B	X	A	X	X	X	B	X	B	A	X	B	B	X	A	B	X	X	X	X	X	B	A	B	X	A	A	B	X	A	A
GM19:2103536	X	B	X	X	X	A	B	B	A	B	X	X	B	X	X	A	B	A	B	X	A	B	X	X	B	A	B	A	X	B	B	X	A	B	X	X	X	X	X	B	A	B	X	A	A	B	X	A	A
GM19:2171261	B	B	X	X	B	A	B	B	A	B	B	A	B	B	X	A	B	A	B	X	A	X	A	X	B	X	B	A	X	B	B	X	A	B	B	X	B	X	X	B	A	B	X	A	A	B	A	A	A
GM19:2171594	X	X	X	X	X	A	B	B	A	B	B	X	B	A	X	A	B	A	B	B	A	X	A	X	B	X	B	A	B	B	B	B	A	B	B	X	X	A	A	B	A	X	X	A	X	B	B	A	A
GM19:2389223	X	X	X	X	X	A	B	B	A	B	B	X	B	A	X	A	B	A	B	B	A	X	A	X	B	X	B	A	B	B	B	B	A	B	B	X	B	A	A	B	A	X	X	A	X	B	B	A	A
GM19:2401959	X	X	A	X	X	A	B	B	A	B	B	X	B	A	X	A	B	A	B	B	A	X	A	X	B	X	B	A	B	B	B	B	A	B	B	X	B	A	A	B	A	X	X	A	X	B	B	A	A
GM19:2405229	X	X	A	X	X	A	B	B	A	B	B	X	B	X	X	A	B	A	B	B	A	X	A	X	B	X	B	A	B	B	B	B	A	B	B	X	B	A	A	B	A	X	X	A	X	B	B	A	A
GM19:2412214	X	X	A	X	X	A	B	B	A	B	B	X	B	X	X	A	B	A	B	B	X	X	A	X	B	X	B	A	B	B	B	B	A	B	B	X	B	A	A	B	A	X	X	A	X	B	B	A	A
GM19:2416533	X	X	A	X	X	A	B	B	A	B	B	X	B	X	X	X	B	X	B	B	X	X	A	X	B	X	B	A	B	B	B	B	A	B	B	X	B	A	A	B	X	X	X	A	X	B	B	A	X
GM19:38085139	X	X	A	X	X	X	B	A	B	X	X	X	X	X	X	X	X	X	B	B	X	X	B	X	B	X	X	B	B	B	B	B	A	X	B	X	B	A	A	X	X	X	X	A	X	A	B	A	X
GM19:38131224	X	X	A	X	X	X	B	A	B	X	X	X	X	B	X	X	X	X	B	B	X	X	B	X	B	X	X	B	B	B	B	B	A	X	B	X	B	A	A	X	X	X	X	A	X	A	B	A	X
GM19:38157961	X	X	A	X	X	X	B	A	B	X	X	X	X	B	X	X	X	X	B	B	X	X	B	X	B	X	X	B	B	B	B	B	A	X	B	X	B	A	A	X	X	X	X	A	X	A	B	A	X
GM19:38325102	X	X	A	X	X	X	B	A	B	X	X	X	X	B	X	X	X	X	B	B	X	X	B	X	B	X	X	B	B	B	B	B	A	X	B	X	B	A	A	X	X	X	X	A	X	A	B	A	X
GM19:38427738	X	X	A	X	X	X	B	A	B	X	X	X	X	B	X	X	X	X	B	B	X	X	B	X	B	X	X	B	B	B	B	B	A	X	B	X	B	A	A	X	X	X	X	A	X	A	B	A	X
GM19:38668934	X	X	A	X	X	X	B	A	B	X	X	X	X	B	X	X	X	X	B	B	X	X	B	X	B	X	X	B	B	B	B	B	A	X	B	X	B	A	A	X	X	X	X	A	X	A	B	A	X
GM19:38819427	X	X	A	X	X	X	B	A	B	X	X	X	X	B	X	X	X	X	B	B	X	X	B	X	B	X	X	B	B	B	B	B	A	X	B	X	B	A	A	X	X	X	X	A	X	A	B	A	X
GM19:38884616	X	X	A	X	X	X	B	A	B	X	X	X	X	B	X	X	X	X	B	B	X	X	B	X	B	X	X	B	B	X	B	B	A	X	B	X	B	A	A	X	X	X	X	A	X	A	B	A	X
GM19:39075579	X	X	A	X	X	X	X	A	B	X	X	X	X	B	X	X	X	X	B	B	X	X	B	X	B	X	X	B	B	X	B	B	A	X	B	X	B	A	A	X	X	X	X	A	X	A	B	A	X
GM19:39078304	X	X	A	X	X	X	X	A	B	X	X	X	X	B	X	X	X	X	B	B	X	X	B	X	B	X	X	B	B	X	B	B	A	X	B	X	B	A	A	X	X	X	X	A	X	A	B	A	X
GM19:39096520	X	X	A	X	X	X	X	A	B	X	X	X	X	B	X	X	X	X	B	B	X	X	B	X	B	X	X	B	B	X	B	B	A	X	B	X	B	A	A	X	X	X	X	A	X	A	B	A	X
GM19:39331658	X	X	A	X	X	X	X	A	B	X	X	X	X	B	X	X	X	X	B	X	X	X	B	X	B	X	X	B	B	X	B	B	A	X	B	X	B	A	A	X	X	X	X	A	X	A	B	A	X
GM19:39348883	X	X	A	X	X	X	X	A	B	X	X	X	X	B	X	X	X	X	B	X	X	X	B	X	B	X	X	B	B	X	B	B	A	X	B	X	B	A	A	X	X	X	X	A	X	A	B	A	X
GM19:39369710	X	X	A	X	X	X	X	A	B	X	X	X	X	B	X	X	X	X	B	X	X	X	B	X	B	X	X	B	B	X	B	X	A	X	B	X	B	A	A	X	X	X	X	A	X	A	B	A	X
GM19:39641563	X	X	A	X	X	X	X	A	B	X	X	X	X	B	X	X	X	X	B	X	X	X	B	X	B	X	X	B	B	X	B	X	A	X	B	X	B	A	A	X	X	X	X	A	X	A	B	A	X
GM19:39891874	X	X	A	X	X	X	X	A	B	X	X	X	X	B	X	X	X	X	B	X	X	X	B	X	B	X	X	B	B	X	B	X	A	X	B	X	B	A	A	X	X	X	X	A	X	A	B	A	X
GM19:39899286	X	X	A	X	X	X	X	A	B	X	X	X	X	B	X	X	X	X	B	X	X	X	B	X	B	X	X	B	B	X	B	X	A	A	B	X	B	A	A	X	X	X	X	A	X	A	B	A	X
GM19:39937327	X	X	A	X	X	X	X	A	B	X	X	X	X	B	X	X	X	X	B	X	X	X	X	X	B	X	X	B	B	X	B	X	A	A	B	X	B	A	A	X	X	X	X	A	X	A	B	A	X
GM19:39977565	X	X	A	X	X	X	X	A	B	X	X	X	X	B	X	X	X	X	B	X	X	X	X	X	B	X	X	B	B	X	B	X	A	A	B	X	B	A	A	X	X	A	X	A	X	A	B	A	X
GM19:40266216	X	X	A	X	A	X	X	A	B	X	X	X	X	B	X	X	X	X	B	X	X	X	X	X	B	X	X	B	B	X	B	X	A	A	B	X	B	A	A	X	X	A	X	A	X	A	B	A	X
GM19:41419450	X	X	A	X	A	X	X	A	B	X	X	X	X	B	X	B	X	X	B	X	X	X	X	X	B	X	X	B	B	X	B	X	A	A	B	X	B	A	A	X	X	A	X	A	X	X	B	X	X
GM19:41433572	X	X	A	X	A	X	X	A	B	X	X	X	X	B	X	B	X	X	B	X	X	X	X	X	B	X	X	B	B	X	B	X	A	A	B	X	B	A	A	X	X	A	X	A	X	X	B	X	X
GM19:41471856	X	X	A	X	A	X	X	A	B	X	X	X	X	B	X	B	X	X	B	X	X	X	X	X	B	X	X	B	B	X	B	X	A	A	B	X	B	A	A	X	X	A	X	A	X	X	B	X	X
GM19:41688299	X	X	A	X	A	X	X	A	B	X	X	X	X	B	X	B	X	X	B	X	X	X	X	X	B	X	X	B	B	X	B	X	A	A	B	X	B	A	A	X	X	A	X	A	X	X	B	X	X
GM19:41805542	X	X	A	X	A	X	X	A	B	X	X	X	X	B	X	B	X	X	B	X	X	X	X	X	B	X	X	B	B	X	B	X	A	A	B	X	B	A	A	X	X	A	X	A	X	X	B	X	X
GM19:42084832	X	X	A	X	A	X	X	A	B	X	X	X	X	B	B	B	X	X	B	X	X	X	X	X	B	X	X	B	B	X	B	X	A	A	B	X	B	A	A	X	X	A	X	A	X	X	B	X	X
GM19:42201464	X	X	A	X	A	X	X	A	B	X	X	X	X	B	B	B	X	X	B	X	X	X	X	X	B	X	X	B	B	X	B	X	A	A	B	X	B	A	A	X	X	A	X	A	X	X	B	X	X
GM19:42883524	X	X	A	X	A	X	X	A	B	X	X	X	X	B	B	B	X	X	B	X	X	X	X	X	B	X	X	B	B	X	B	X	A	A	B	X	B	A	A	X	X	A	X	A	X	X	B	X	X
GM19:43240106	X	X	A	X	A	X	X	A	B	X	X	X	X	B	B	B	X	X	B	X	X	X	X	A	B	X	X	B	B	X	B	X	A	A	B	X	B	A	A	X	X	A	X	A	X	X	X	X	X
GM19:43240193	X	X	A	X	A	X	X	A	B	X	X	X	X	B	B	B	X	X	B	X	A	X	X	A	B	X	X	B	B	X	B	X	A	A	B	X	B	A	A	X	X	A	X	A	X	X	X	X	X
GM19:43315532	X	X	A	X	A	X	X	A	B	X	X	X	X	B	B	B	X	X	B	X	A	X	X	A	B	X	X	B	B	X	B	X	A	A	B	X	B	A	A	X	X	A	X	A	X	X	X	X	X
GM19:43990450	X	X	A	X	A	X	X	A	B	X	X	X	X	B	B	B	X	X	B	X	A	X	X	A	B	X	X	X	B	X	B	X	X	A	B	X	B	X	B	X	B	X	X	A	X	X	X	X	X
GM19:44491689	X	X	X	X	A	X	X	A	B	X	B	X	X	B	X	B	X	X	B	X	A	X	X	A	B	X	X	X	X	X	B	X	X	A	B	X	B	X	B	X	B	X	X	A	X	X	X	X	X
GM19:44600276	X	X	X	X	A	X	X	A	B	X	B	X	X	B	X	B	X	X	B	X	A	X	X	A	B	X	X	X	X	X	B	X	X	A	B	X	B	X	B	X	B	X	X	A	X	X	X	X	X
GM19:44603046	X	X	X	X	A	X	X	A	B	X	B	X	X	B	X	B	X	X	B	X	A	X	X	A	B	X	X	X	X	X	B	X	X	A	B	X	B	X	B	X	B	X	X	A	A	X	X	X	X
GM19:44655139	X	X	X	X	A	X	X	A	B	X	B	X	X	B	X	B	X	X	A	X	A	X	X	A	B	X	X	X	X	X	B	X	X	A	B	X	B	X	B	X	B	X	X	A	A	X	X	X	X
GM19:44657286	X	X	X	X	X	X	X	X	B	X	B	X	X	B	X	B	X	X	A	X	X	X	X	X	B	X	X	X	X	X	B	X	X	X	B	X	B	X	B	X	B	X	X	X	A	X	X	X	X
GM19:49882521	X	A	X	X	X	X	X	X	X	X	B	X	X	B	X	B	X	X	A	B	X	X	B	X	X	X	A	X	X	X	X	X	X	X	B	X	X	X	B	X	B	X	B	X	A	B	A	B	X
GM19:49912458	X	A	X	A	X	X	X	X	X	X	B	X	X	B	X	B	X	X	A	B	X	A	B	X	X	A	A	X	X	X	X	X	X	X	B	X	X	X	B	X	B	X	B	X	A	B	A	B	X
GM19:49931941	X	A	X	A	X	X	X	X	X	X	B	X	X	B	X	B	X	X	A	B	X	A	B	X	X	A	A	X	X	X	X	X	X	X	B	X	X	X	B	X	B	X	B	X	A	B	A	B	A
GM19:50003637	X	A	X	A	X	X	X	X	X	X	B	X	X	B	X	B	X	X	A	B	X	A	B	X	X	A	A	X	X	X	X	X	X	X	B	X	X	X	B	X	B	X	B	X	A	B	A	B	A
GM19:50366360	X	A	X	A	X	X	X	X	X	X	B	X	X	B	X	B	X	X	A	B	X	A	B	X	X	A	A	X	X	X	X	X	X	X	B	X	X	X	B	X	B	X	B	X	A	B	A	B	A
GM19:50660783	X	A	X	A	X	X	X	X	X	X	B	X	X	B	X	B	X	X	A	B	X	A	B	X	X	A	A	X	X	X	X	X	X	X	B	X	X	X	B	X	B	X	B	X	A	B	A	B	A
GM19:50668261	X	A	X	A	X	X	X	X	X	X	B	X	X	B	X	B	X	X	A	B	X	A	B	X	X	A	A	X	X	X	X	X	X	X	B	X	X	X	B	X	B	X	B	X	A	B	A	B	A
GM19:50668662	X	A	X	A	X	X	X	A	X	X	B	X	X	B	B	B	X	B	A	B	X	A	B	X	X	A	A	X	X	X	B	B	X	X	B	X	X	X	B	X	B	X	B	X	A	B	A	B	A
GM20:115264	X	A	B	B	X	X	X	X	A	B	X	X	X	X	B	X	B	X	A	X	B	X	A	X	B	A	X	X	B	A	A	X	A	A	X	A	A	B	X	X	X	B	A	X	X	A	X	A	A
GM20:132627	X	A	B	B	X	X	X	X	A	B	X	X	X	X	B	X	B	X	A	X	B	X	A	X	B	X	X	X	B	A	A	X	X	A	X	A	X	B	X	X	X	B	A	X	X	A	X	X	A
GM20:147915	X	A	B	B	X	B	X	A	A	B	X	X	X	A	B	A	B	B	A	X	B	X	A	X	B	X	X	X	B	A	A	X	X	A	X	A	X	B	X	X	X	B	A	X	X	A	X	X	A
GM20:656317	X	X	B	X	X	X	X	X	X	B	X	B	X	X	B	X	X	X	A	X	B	X	A	A	X	X	X	B	X	A	X	X	X	A	X	A	X	B	X	B	X	B	A	X	X	A	X	X	A
GM20:657441	A	X	B	A	X	X	B	A	X	B	X	B	X	X	B	A	X	X	A	X	B	A	A	A	X	A	X	B	X	A	X	X	X	A	X	A	X	B	X	B	X	B	A	A	A	A	A	X	A
GM20:658073	X	X	B	X	X	X	A	A	X	B	X	B	X	A	B	X	X	X	A	X	B	A	A	A	A	X	X	B	X	A	X	X	X	A	X	A	X	B	X	X	X	B	A	A	X	A	X	B	A
GM20:686368	X	X	B	X	X	X	A	B	X	B	X	B	X	A	B	X	X	X	A	X	B	A	A	A	A	X	X	B	X	A	X	X	X	X	A	A	X	B	X	B	X	B	A	A	X	A	X	B	A
GM20:813732	X	X	B	X	A	X	A	B	X	B	X	B	X	A	B	A	X	X	A	X	B	A	A	A	A	X	X	B	X	A	X	X	X	X	A	A	X	B	X	B	X	B	A	A	X	A	X	B	A
GM20:814253	X	X	B	X	A	X	A	B	X	B	X	B	X	A	B	A	X	X	A	X	B	A	A	A	A	X	X	B	X	A	X	X	X	X	A	A	X	B	X	B	X	B	A	A	X	A	X	B	A
GM20:1157937	X	X	B	X	A	X	A	B	X	X	X	B	X	A	B	A	X	X	A	X	B	A	A	A	A	X	X	B	X	A	X	X	X	X	A	A	X	X	X	B	X	B	X	A	X	B	X	B	X
GM20:1291334	X	X	B	X	A	X	A	B	X	X	X	B	X	A	B	A	X	X	A	X	X	A	A	A	A	X	X	B	X	A	X	X	X	X	A	A	X	X	X	B	X	B	X	A	X	B	X	B	X
GM20:1470837	X	X	B	X	A	X	A	B	X	X	X	B	X	A	B	A	X	X	A	X	X	B	A	A	A	X	X	B	X	A	X	X	X	X	A	A	X	X	X	B	X	X	X	A	X	B	X	B	X
GM20:2039705	X	X	B	X	A	X	A	B	X	X	X	B	X	A	B	A	X	X	A	X	X	B	A	A	A	X	X	B	X	A	X	X	X	X	A	A	X	X	X	B	X	X	X	A	X	B	X	B	X
GM20:2232036	X	X	B	X	A	X	A	B	X	X	X	B	X	A	B	A	X	X	A	X	X	B	A	A	A	X	X	B	X	A	X	X	X	X	A	A	X	X	X	B	X	X	X	A	X	B	X	B	X
GM20:2404100	X	X	B	X	A	X	A	B	X	X	X	B	X	A	B	A	X	X	B	X	X	B	B	A	A	X	X	B	X	B	X	X	X	X	A	A	X	X	X	B	X	X	X	A	X	B	X	B	X
GM20:2405379	X	X	B	X	X	X	A	B	X	X	X	B	X	A	B	A	X	X	B	X	X	B	B	A	X	X	X	B	X	B	X	X	X	X	X	A	X	X	X	B	X	X	X	A	X	B	X	B	X
GM20:2610948	X	X	B	X	X	X	X	B	X	X	X	B	X	X	B	A	X	X	B	X	X	B	B	A	X	X	X	B	X	B	X	X	X	X	X	A	X	X	X	B	X	X	X	A	X	B	X	B	X
GM20:43334460	A	X	B	X	X	X	X	B	X	X	X	X	X	X	B	A	B	X	B	X	X	B	B	A	X	X	X	X	X	B	X	X	A	X	X	A	X	X	X	X	X	B	X	A	B	B	X	X	X
GM20:43342103	A	X	B	X	X	X	X	B	X	X	X	X	X	X	B	X	B	A	B	X	X	B	B	B	X	X	X	X	X	B	X	X	A	X	X	A	X	X	X	X	X	B	X	A	B	B	X	X	X
GM20:43667960	A	X	B	X	X	X	X	B	X	X	X	X	X	X	B	X	B	A	B	X	X	B	B	B	X	X	X	X	X	B	X	X	A	X	X	A	X	X	X	X	X	B	X	A	B	B	X	X	X
GM20:43686172	A	X	B	X	X	X	X	B	X	X	X	X	X	X	B	X	B	A	B	X	X	B	B	B	X	X	X	X	X	B	X	X	A	X	X	A	X	X	X	X	X	B	X	A	B	B	X	X	X
GM20:43691445	A	X	B	X	X	X	X	B	X	X	X	X	X	X	B	X	B	A	B	X	X	B	B	B	X	X	X	X	X	B	X	X	A	X	X	A	X	X	X	X	X	B	X	A	B	B	X	X	X
GM20:43804888	A	X	B	X	X	X	X	B	X	X	X	X	X	X	B	X	B	A	B	X	X	B	B	B	X	X	X	X	X	B	X	X	A	X	X	A	X	X	X	X	X	B	X	A	B	B	X	X	X
GM20:44006264	A	X	B	X	X	X	X	B	X	X	X	X	X	X	B	X	B	A	B	X	X	B	B	B	X	X	X	X	X	B	X	X	A	X	X	A	X	X	X	X	X	B	X	A	B	B	X	B	X
GM20:44258339	A	X	B	X	X	X	X	B	X	X	X	X	X	X	B	X	B	A	B	X	X	B	B	B	X	X	X	X	X	B	X	X	A	X	X	A	X	X	X	X	X	B	X	A	B	B	X	B	X
GM20:44440845	A	X	B	X	X	X	X	B	A	X	X	X	X	X	B	X	B	A	B	X	X	B	B	B	X	X	X	X	X	B	X	X	A	X	X	A	X	X	X	X	X	B	X	A	B	B	X	B	X
GM20:44442500	A	X	B	X	X	X	X	B	A	X	X	X	X	X	B	X	B	A	B	X	X	B	B	B	X	X	A	X	X	B	X	X	A	A	X	A	X	X	X	X	X	B	X	A	B	B	X	B	X
GM20:44443973	A	X	B	X	X	X	X	B	A	X	X	X	X	X	B	X	B	A	B	X	X	B	B	B	X	X	X	X	X	B	X	X	A	X	X	A	X	X	X	X	X	B	X	A	B	B	X	B	X
GM20:44608041	A	X	B	X	X	X	X	B	X	X	X	X	X	X	B	X	B	A	B	X	X	B	B	B	X	X	X	X	X	B	X	X	A	X	X	A	X	X	X	X	X	B	X	A	B	B	X	B	X
[truncated: 127 more columns]

## Sheet: f. Genotypes QS15544
Genotypes	QS15544.10002	QS15544.10005	QS15544.10009	QS15544.10010	QS15544.10012	QS15544.10014	QS15544.10021	QS15544.10022	QS15544.10023	QS15544.10025	QS15544.10030	QS15544.10031	QS15544.10033	QS15544.10034	QS15544.10035	QS15544.10036	QS15544.10037	QS15544.10039	QS15544.10040	QS15544.10042	QS15544.10047	QS15544.10048	QS15544.10051	QS15544.10053	QS15544.10056	QS15544.10057	QS15544.10058	QS15544.10059	QS15544.10060	QS15544.10063	QS15544.10064	QS15544.10065	QS15544.10066	QS15544.10068	QS15544.10071	QS15544.10073	QS15544.10075	QS15544.10076	QS15544.10077	QS15544.10084	QS15544.10087	QS15544.10088	QS15544.10089	QS15544.10092	QS15544.10096	QS15544.10098	QS15544.10100	QS15544.10103	QS15544.10106
GM01:528709	A	X	A	B	B	B	X	B	A	A	A	A	B	B	B	B	B	B	A	A	B	A	X	B	A	B	B	B	A	A	B	B	B	A	B	X	A	B	B	A	A	B	B	X	B	A	B	B	A
GM01:567830	A	A	A	B	B	B	X	B	A	X	A	A	B	B	X	B	B	B	A	A	B	A	A	B	A	B	B	B	A	A	B	B	B	A	X	X	A	B	B	A	A	B	B	X	B	A	B	B	A
GM01:827682	A	X	A	B	B	B	X	B	A	X	A	A	B	B	B	B	B	B	A	A	B	A	B	B	A	A	B	B	A	A	B	B	B	A	B	A	A	B	B	A	A	B	B	X	B	A	B	B	A
GM01:836735	A	A	A	B	B	B	A	B	A	B	A	A	B	B	X	B	B	A	A	A	B	A	A	B	A	A	B	B	A	A	B	B	B	A	B	A	A	B	B	A	A	B	B	X	B	A	B	B	A
GM01:890127	B	A	A	B	B	B	X	B	A	B	A	A	B	B	B	B	B	A	A	A	B	A	B	B	A	A	B	B	A	A	B	B	B	A	B	A	A	B	B	A	A	B	B	X	B	A	B	B	A
GM01:955453	B	X	A	B	B	B	B	B	A	B	A	A	B	B	B	B	B	A	A	A	B	A	B	B	A	A	B	B	A	A	B	B	B	A	B	A	A	B	B	A	A	B	B	B	B	A	B	B	A
GM01:1036669	B	X	A	B	B	B	X	B	A	X	A	A	B	B	B	B	B	A	A	A	B	A	B	B	A	A	B	B	A	A	B	B	B	A	B	A	A	B	B	A	A	B	B	B	B	A	B	B	A
GM01:1036754	B	B	A	B	B	B	B	B	A	X	A	A	B	B	B	B	B	A	A	A	B	A	B	B	A	A	B	B	A	A	B	B	B	A	B	A	A	B	B	A	A	B	B	B	B	A	B	B	A
GM01:1270108	B	B	A	B	B	B	B	B	A	X	A	A	B	B	B	B	B	A	A	A	B	A	B	B	A	A	B	B	A	A	B	B	B	A	B	A	A	B	B	A	A	B	B	B	B	A	B	B	A
GM01:1270186	B	B	A	B	B	B	B	B	A	A	A	A	B	B	B	B	B	A	A	B	B	A	B	B	A	A	B	B	A	A	B	B	B	A	B	A	A	B	B	A	A	B	B	B	B	A	B	B	A
GM01:1335276	B	X	A	B	B	B	X	B	A	X	A	A	B	B	B	B	B	A	A	B	B	A	A	B	A	A	B	B	A	A	B	B	B	A	B	A	A	B	B	A	A	B	B	X	B	A	B	B	A
GM01:1393239	B	X	A	B	B	B	B	B	A	X	A	A	B	B	B	B	B	A	A	B	B	A	A	B	A	A	B	B	A	A	B	A	B	A	B	A	A	B	B	A	X	A	B	B	B	A	B	B	A
GM01:1482495	B	X	A	B	B	B	X	B	A	X	A	A	B	B	B	B	B	A	A	B	X	A	A	B	A	A	B	B	A	A	B	A	B	A	B	A	A	B	B	A	X	A	B	X	B	A	B	B	A
GM01:1482512	B	A	A	B	B	B	B	B	A	A	A	A	B	B	B	B	B	A	A	A	X	A	A	B	A	A	B	B	A	A	B	A	B	A	B	A	A	B	B	A	X	A	B	X	B	A	B	B	A
GM01:1487966	B	X	A	B	B	B	B	B	A	X	A	A	B	B	B	B	B	A	A	B	B	A	A	B	A	A	B	B	A	A	B	A	B	A	B	A	A	B	B	A	X	A	B	X	B	A	B	B	A
GM01:1501401	B	X	A	B	B	B	B	B	A	X	A	A	B	B	B	B	B	A	A	B	B	A	A	B	A	A	B	B	A	A	B	A	B	A	B	A	A	B	B	A	X	A	B	X	B	A	B	B	A
GM01:2738587	B	B	A	B	B	A	A	B	B	A	A	A	B	B	B	B	B	B	A	B	B	A	A	B	A	A	B	A	A	A	B	A	B	A	X	A	X	X	B	A	B	A	B	X	A	B	A	B	B
GM01:2832822	B	B	A	A	B	A	A	B	B	A	A	A	B	B	B	B	A	B	A	B	B	A	A	B	B	A	B	A	A	A	B	A	B	A	B	A	X	A	A	A	B	A	B	X	A	B	A	B	B
GM01:3160203	B	B	A	A	B	A	A	B	B	A	A	A	B	B	B	B	A	B	A	B	B	A	A	B	B	A	B	A	A	A	B	A	B	A	A	A	B	B	A	A	A	A	B	B	A	B	A	B	B
GM01:3160395	B	B	A	A	B	A	A	B	B	A	A	A	B	B	B	B	A	B	A	B	B	A	A	B	B	A	B	A	A	A	B	A	B	A	A	A	B	B	A	A	A	A	B	X	A	B	A	B	B
GM01:3163407	B	B	A	A	B	A	A	B	B	A	A	A	B	B	B	B	A	B	A	B	B	A	A	B	B	A	B	A	A	A	B	A	B	A	A	A	B	B	A	A	A	A	B	X	A	B	A	B	B
GM01:3248515	B	B	A	B	B	A	A	B	B	A	A	A	A	B	A	B	A	B	A	B	B	A	A	B	B	A	B	A	A	A	A	A	B	A	A	A	B	B	A	A	A	A	A	A	A	B	A	B	B
GM01:3270943	B	B	A	A	B	A	A	B	B	A	A	A	A	B	A	B	A	B	A	B	B	A	A	B	B	A	B	A	A	A	B	A	B	A	A	A	B	B	A	A	A	A	A	A	A	B	A	B	B
GM01:3314399	B	B	A	A	B	A	A	B	B	A	A	A	A	B	A	B	A	B	A	B	B	A	A	B	B	A	B	A	A	A	B	A	B	A	A	A	B	B	A	A	A	A	A	A	A	B	A	B	B
GM01:3361195	B	B	A	A	B	A	A	A	B	A	X	A	A	B	A	B	A	B	A	B	B	A	A	B	B	B	B	A	A	A	B	A	B	A	A	A	X	A	A	A	A	A	A	A	A	B	A	B	B
GM01:3453021	B	B	A	A	B	A	A	A	B	A	X	A	A	B	A	B	A	B	A	B	B	A	A	B	B	B	B	A	A	A	B	A	B	A	A	A	X	A	A	A	A	A	A	A	A	B	A	B	B
GM01:3599866	B	B	A	A	B	A	A	A	B	A	X	A	A	B	B	B	A	B	A	B	B	A	A	B	B	B	B	A	A	A	B	A	B	A	A	A	X	A	A	A	X	A	A	A	A	B	A	B	B
GM01:3607146	B	B	A	A	B	A	A	A	B	A	X	A	A	B	B	B	A	B	A	B	B	A	A	B	B	B	B	A	A	A	B	A	B	A	A	A	X	A	A	A	B	A	A	A	A	B	A	B	B
GM01:3686897	B	B	A	A	B	A	A	A	B	A	B	A	A	B	B	B	A	B	A	B	B	A	A	B	B	B	B	A	A	A	B	A	B	A	A	A	A	A	A	A	B	A	A	A	A	B	A	B	B
GM01:3704542	B	B	A	A	B	A	A	A	B	A	B	A	A	B	B	B	A	B	A	B	B	A	A	B	B	B	B	A	A	A	B	A	B	A	A	A	A	A	X	A	B	A	A	A	A	B	A	B	B
GM01:3805813	B	B	A	A	B	A	A	A	B	A	X	A	A	B	B	B	A	B	A	B	B	A	A	B	B	B	B	A	A	A	B	A	B	A	A	A	A	A	A	A	X	A	A	A	A	B	A	B	B
GM01:4226335	B	B	B	A	B	A	A	A	B	A	A	A	X	B	B	B	A	B	A	B	B	X	B	B	B	B	B	A	B	A	B	A	B	A	A	A	A	A	A	A	A	A	A	A	A	B	A	B	B
GM01:4337820	B	B	B	A	B	A	A	A	B	A	B	A	A	B	B	B	A	B	A	B	B	B	B	B	B	B	A	A	B	A	B	A	B	A	A	A	A	A	A	A	A	A	A	A	A	B	A	B	B
GM01:4809449	B	B	B	A	B	A	A	A	B	A	B	A	X	B	B	B	A	B	A	B	B	B	B	B	B	B	A	A	B	A	B	A	B	B	A	A	A	A	A	X	A	A	A	A	A	B	B	B	B
GM01:5016538	A	B	B	A	B	A	A	A	B	A	B	A	A	B	B	B	A	B	A	B	B	B	B	B	B	B	A	A	B	A	B	A	B	B	A	A	A	A	A	X	A	A	A	A	A	B	B	B	B
GM01:5181172	B	B	B	A	B	A	A	A	B	A	B	A	A	B	B	B	A	B	A	B	B	B	B	B	B	B	A	A	B	A	B	A	B	B	A	A	A	A	A	X	A	A	A	A	A	B	B	B	B
GM01:5286010	A	B	B	A	B	A	A	A	B	A	B	A	A	B	B	B	A	B	A	B	B	B	B	B	B	B	A	A	B	A	B	A	B	B	A	A	A	A	A	X	A	A	A	A	A	B	B	B	B
GM01:5347259	A	B	B	A	B	A	A	A	B	A	B	A	A	B	B	B	A	B	A	B	B	B	B	B	B	B	A	A	B	A	B	A	B	B	A	A	A	A	A	X	A	A	A	A	A	B	B	B	B
GM01:5691163	A	B	B	A	B	A	A	A	B	X	B	A	A	B	B	B	A	B	A	B	B	B	B	B	B	B	A	A	B	A	B	A	B	B	A	A	A	X	A	X	A	A	A	A	A	B	B	B	B
GM01:5700523	A	B	B	A	B	A	A	A	B	B	B	A	A	B	B	B	A	B	A	B	B	B	B	B	B	B	A	A	B	A	B	A	B	B	A	A	A	A	A	B	A	A	A	A	A	B	B	B	B
GM01:5939635	A	B	B	A	B	A	A	A	B	B	B	A	A	B	B	B	A	B	A	B	B	B	B	B	B	B	A	A	B	A	B	A	B	B	A	A	A	A	A	B	A	A	A	A	A	B	A	B	B
GM01:6185852	A	B	B	A	B	A	A	A	B	B	B	A	B	B	B	B	A	B	A	B	B	B	B	B	B	B	A	A	B	A	B	A	B	B	A	A	A	A	A	B	A	A	B	A	A	B	B	B	B
GM01:6185939	A	B	B	A	B	A	A	A	B	B	B	A	B	B	B	B	A	B	A	B	B	B	B	B	B	B	A	A	B	A	B	A	B	B	A	A	A	A	A	B	A	A	B	A	A	B	B	B	B
GM01:6223855	A	B	B	A	B	A	A	A	B	B	B	A	B	B	B	B	A	B	A	B	B	B	B	B	B	B	A	A	B	A	B	A	B	B	A	A	A	A	A	B	A	A	B	A	A	B	B	B	B
GM01:6387931	A	B	B	A	B	A	A	A	B	B	B	A	B	B	B	B	A	B	A	B	B	B	B	B	B	B	A	A	B	A	B	A	B	B	A	A	A	A	A	B	A	A	B	A	A	B	B	B	B
GM01:6389714	A	B	B	A	B	A	A	A	B	B	B	A	B	B	B	B	A	B	A	B	B	B	B	B	B	B	A	A	B	A	B	A	B	B	A	A	A	A	A	B	A	A	B	A	A	B	B	B	B
GM01:6517814	A	B	B	A	B	A	A	A	B	B	B	A	B	B	B	B	A	B	A	B	B	B	B	B	B	B	A	A	B	A	B	A	B	B	A	A	A	A	A	B	A	A	B	A	A	B	B	B	B
GM01:6579997	A	B	B	A	B	A	A	A	B	B	B	A	B	B	B	B	A	B	A	B	B	B	B	B	B	B	A	A	B	A	B	A	B	B	A	A	A	A	A	B	A	A	B	A	A	B	B	B	B
GM01:6580096	A	B	B	A	B	A	A	A	B	B	B	A	B	B	B	B	A	B	A	B	B	B	B	B	B	B	A	A	B	A	B	A	B	B	A	A	A	A	A	B	A	A	B	A	A	B	B	B	B
GM01:6580209	A	B	B	A	B	A	A	A	B	B	B	A	B	B	B	B	A	B	A	B	B	B	B	B	B	B	A	A	B	A	B	A	B	B	A	A	A	A	A	B	A	A	B	A	A	B	B	B	B
GM01:6580306	A	B	B	A	B	A	A	A	B	B	B	A	B	B	B	B	A	B	A	B	B	B	B	B	B	B	A	A	B	A	B	A	B	B	A	A	A	A	A	B	A	A	B	A	A	B	B	B	B
GM01:6580569	A	B	B	A	B	A	A	A	B	B	B	A	B	B	B	B	A	B	A	B	B	B	B	B	B	B	A	A	B	A	B	A	B	B	A	A	A	A	A	B	A	A	B	A	A	B	B	B	B
GM01:38875919	A	B	B	A	B	A	A	A	B	B	B	A	A	B	B	B	B	B	A	B	B	B	B	B	B	A	A	B	B	A	B	A	B	B	A	A	A	A	A	A	B	A	A	A	A	B	A	B	B
GM01:38939588	A	B	B	A	B	A	A	A	B	B	B	A	A	B	B	B	A	B	A	B	B	B	B	B	B	A	A	A	B	A	B	A	B	B	A	A	A	A	B	A	B	A	A	A	A	B	A	B	B
GM01:39112506	A	B	B	A	B	A	A	A	B	B	B	A	A	B	B	B	A	B	A	B	B	B	B	B	B	A	A	A	B	A	B	A	B	B	A	A	A	A	A	A	B	A	A	A	A	B	A	B	B
GM01:39154217	A	B	B	A	B	A	A	A	B	B	B	A	A	B	B	B	A	B	A	B	B	B	B	B	B	A	A	B	B	A	B	A	B	B	A	A	A	A	A	A	B	A	A	A	A	B	A	B	B
GM01:39202170	A	B	B	A	B	A	A	A	B	B	B	A	A	B	B	B	A	B	A	B	B	B	B	B	B	A	A	B	B	A	B	A	B	B	A	A	A	A	A	A	B	A	A	A	A	B	A	B	B
GM01:39215368	A	B	B	A	B	A	A	A	B	B	B	A	A	B	B	B	A	B	A	B	B	B	B	B	B	A	A	A	B	A	B	A	B	B	A	A	A	A	A	A	B	A	A	A	A	B	A	B	B
GM01:39390401	A	B	B	A	B	A	A	A	B	B	B	A	A	B	B	B	A	B	A	B	B	B	B	B	B	A	A	A	B	A	B	A	B	B	A	A	A	A	A	A	B	A	A	A	A	B	A	B	B
GM01:39394579	A	B	B	A	B	A	A	A	B	B	B	A	A	B	B	B	B	B	A	B	B	B	B	B	B	A	A	X	B	A	B	A	B	B	A	A	A	A	A	A	B	A	A	A	A	B	A	B	B
GM01:39399889	A	B	B	A	B	A	A	A	B	B	B	A	A	B	B	B	B	B	A	B	B	B	B	B	B	A	A	B	B	X	B	A	B	B	X	B	A	A	A	X	B	X	A	A	A	B	A	B	B
GM01:39404966	A	B	B	A	B	A	A	A	B	B	B	A	A	B	B	B	B	B	A	B	B	B	B	B	B	A	A	B	B	A	B	A	B	B	A	A	A	A	A	A	B	A	A	A	A	B	A	B	B
GM01:39405971	A	B	B	A	B	A	A	A	B	B	B	A	A	B	B	B	A	B	A	B	B	B	B	B	B	A	A	B	B	A	B	A	B	B	A	A	A	A	A	A	B	A	A	A	A	B	A	B	B
GM01:39488080	A	B	B	A	B	A	A	A	B	B	B	A	A	B	B	B	A	B	A	B	B	B	B	B	B	A	A	X	B	A	B	A	B	B	A	A	A	A	A	A	B	A	A	A	A	B	A	B	B
GM01:39628619	A	B	B	A	B	A	A	A	B	B	B	A	A	B	B	B	B	B	A	B	B	B	B	B	B	A	A	A	B	A	B	A	B	B	A	A	A	A	A	A	B	A	A	A	A	B	A	B	B
GM01:39833386	A	B	B	A	B	A	A	A	B	B	B	A	A	B	B	B	B	B	A	B	B	B	B	B	B	A	A	A	B	A	B	A	B	B	A	A	A	A	A	B	B	A	A	A	A	B	A	B	B
GM01:40146476	A	B	B	A	B	A	A	A	B	B	B	A	A	B	B	B	B	B	A	B	B	B	B	B	B	A	A	B	B	A	B	A	B	B	A	A	A	A	A	B	B	A	A	A	A	B	A	B	B
GM01:40215015	A	B	B	A	B	A	A	A	B	B	B	A	A	B	B	B	B	B	A	B	B	B	B	B	B	A	A	B	B	A	B	A	B	B	A	A	A	A	A	B	B	A	A	A	A	B	A	B	B
GM01:40295746	A	B	B	A	B	A	A	A	B	B	B	A	A	B	B	B	B	B	A	B	B	B	B	B	B	A	A	B	B	A	B	A	B	B	A	A	A	A	A	B	B	A	A	A	A	B	A	B	B
GM01:40600608	A	B	B	A	X	B	A	A	B	B	B	A	A	B	B	B	B	B	A	B	B	B	B	B	B	A	A	X	B	A	B	A	B	B	A	A	A	A	A	B	B	A	A	A	A	B	A	B	B
GM01:40632179	A	B	B	A	B	A	A	A	B	B	B	A	A	B	B	B	X	B	A	B	B	B	B	B	B	A	A	A	B	A	B	A	B	B	A	A	A	A	A	B	B	A	A	A	A	B	A	B	B
GM01:40699203	A	B	B	A	B	A	A	A	B	B	B	A	A	B	B	B	B	B	A	B	B	B	B	B	B	A	A	B	B	A	B	A	B	B	A	A	A	A	A	B	B	A	A	A	A	B	A	B	B
GM01:40907974	A	B	B	A	B	A	A	A	B	B	B	A	A	B	B	B	A	B	A	B	B	B	B	B	B	A	A	B	B	A	B	A	B	B	A	A	A	A	A	A	B	A	A	A	A	B	A	B	B
GM01:40908162	A	B	B	A	B	A	A	A	B	B	B	A	A	B	B	B	A	B	A	B	B	B	B	B	B	A	A	A	B	A	B	A	B	B	A	A	A	A	A	A	B	A	A	A	A	B	A	B	B
GM01:41255818	A	B	B	A	B	A	A	A	B	B	B	A	A	B	B	B	A	B	A	B	B	B	B	B	B	A	A	B	B	A	B	A	B	B	A	A	A	A	A	B	B	A	A	A	A	B	A	B	B
GM01:41882611	A	B	B	A	B	A	A	A	B	B	B	A	A	B	B	B	A	B	A	B	B	B	B	B	B	A	A	B	B	A	B	A	B	B	A	A	A	A	A	B	B	A	A	A	A	B	A	B	B
GM01:41894714	A	B	B	A	B	A	A	A	B	B	B	A	A	B	B	B	A	B	A	B	B	B	B	B	B	A	A	B	B	A	B	A	B	B	A	A	A	A	A	B	B	A	A	A	A	B	A	B	B
GM01:41895210	A	B	B	A	B	A	A	A	B	B	B	A	A	B	B	B	B	B	A	B	B	B	B	B	B	A	A	B	B	A	B	A	B	B	A	A	A	A	A	B	B	A	A	A	A	B	A	B	B
GM01:42709578	A	B	B	A	B	A	A	A	B	B	B	A	A	B	B	B	A	B	A	B	B	B	B	B	B	A	A	B	B	A	B	A	B	B	A	A	A	A	A	A	B	A	A	A	A	B	A	B	B
GM01:42832646	A	B	B	A	B	A	A	A	B	B	B	A	A	B	B	A	A	B	A	X	B	B	B	B	B	A	A	B	B	A	B	A	B	B	A	A	A	A	A	A	B	A	A	A	A	A	A	B	B
GM01:43224652	A	B	B	A	B	A	A	A	B	B	B	A	A	B	B	B	A	B	A	B	B	B	B	B	B	A	A	B	B	A	B	A	B	B	A	A	A	A	A	A	B	A	A	A	A	B	A	B	B
GM01:43231559	A	B	B	A	B	A	A	A	B	B	B	A	A	B	B	B	A	B	A	B	B	B	B	B	B	A	A	B	B	A	B	A	B	B	A	A	A	A	A	A	B	A	A	A	A	B	A	B	B
GM01:43640656	A	B	B	A	B	B	A	A	B	B	B	A	A	B	B	B	A	B	A	B	B	B	B	B	B	A	A	B	B	A	B	A	B	B	A	A	A	A	A	B	B	A	A	A	A	B	A	B	B
GM01:43664652	A	B	B	A	B	X	A	A	B	B	B	A	A	B	B	B	B	B	A	B	B	B	B	B	B	A	A	B	B	A	B	A	B	B	A	A	A	A	A	B	B	A	A	A	A	B	A	B	B
GM01:43672482	A	B	B	A	B	X	A	A	B	B	B	A	A	B	B	B	B	B	A	B	B	B	B	B	B	A	A	B	B	A	B	A	B	B	A	A	A	A	A	X	B	A	A	A	A	B	A	B	B
GM01:43799269	A	B	B	A	B	A	A	A	B	B	B	A	A	B	B	B	B	B	A	B	B	B	B	B	B	A	A	B	B	A	B	A	B	B	A	A	A	A	A	A	B	A	A	A	A	B	A	B	B
GM01:43799954	A	B	B	A	B	A	A	A	B	B	B	A	A	B	B	B	B	B	A	B	B	B	B	B	B	A	A	B	B	A	B	A	B	B	A	A	A	A	A	X	B	A	A	A	X	B	A	B	B
GM01:43878616	A	B	B	A	B	A	A	A	B	B	B	X	A	B	B	B	B	B	A	B	B	B	B	B	B	A	A	B	B	A	B	A	B	B	A	X	A	A	A	B	B	A	A	A	B	B	A	B	B
GM01:44005927	A	B	B	A	B	X	A	A	B	B	B	A	A	B	B	B	B	B	A	B	B	B	B	B	B	A	A	B	B	A	B	A	B	B	A	A	A	A	A	A	B	A	A	A	B	B	A	B	B
GM01:44115773	A	B	B	A	B	A	A	A	B	B	B	A	A	B	B	B	B	B	A	B	B	B	B	B	B	A	A	B	B	A	B	A	B	B	A	B	A	A	A	X	B	A	A	A	X	B	A	B	B
GM01:44129114	A	B	B	A	B	A	A	A	B	B	B	X	A	B	B	B	B	B	A	B	B	B	B	B	B	A	A	B	B	A	B	A	B	B	A	A	A	A	A	A	B	A	A	A	X	B	A	B	B
GM01:46770056	A	B	B	X	B	A	A	A	B	B	B	A	A	B	B	B	B	B	A	B	B	B	B	B	B	A	A	B	B	A	A	A	B	B	A	B	A	A	A	A	B	A	A	A	X	B	A	B	B
GM01:46793767	A	B	B	A	B	A	A	A	B	B	B	A	A	B	B	B	A	B	A	B	B	B	B	B	B	A	A	B	B	A	A	A	B	B	A	B	A	A	A	X	B	A	A	A	X	B	A	B	B
GM01:46802690	A	B	B	A	B	A	A	A	B	B	B	A	A	B	B	B	A	B	A	B	B	B	B	B	B	A	A	B	B	A	A	A	B	B	A	B	A	A	A	A	B	A	A	A	X	B	A	B	B
GM01:46803598	A	B	B	A	B	A	A	A	B	B	B	A	A	B	B	B	B	B	A	B	B	B	B	B	B	A	A	B	B	A	A	A	B	B	A	B	A	A	A	X	B	A	A	A	A	B	A	B	B
GM01:47064013	A	B	B	A	B	A	A	A	B	B	B	A	A	B	B	B	B	B	A	B	B	B	B	B	B	A	A	B	B	A	A	A	B	B	A	B	A	A	A	B	B	A	A	A	A	B	A	B	B
GM01:47354523	A	B	B	A	B	A	A	A	B	B	B	A	A	B	B	B	A	B	A	B	A	B	B	B	B	A	A	B	B	A	A	A	B	B	A	B	A	A	A	A	B	A	A	A	B	B	A	B	B
GM01:47434297	A	B	B	A	B	A	A	A	B	B	B	A	A	B	B	B	A	B	A	B	A	B	B	B	B	A	A	B	B	A	A	A	B	B	A	B	A	A	A	B	B	A	A	A	X	B	A	B	B
GM01:47938024	A	B	B	A	B	A	A	A	B	B	B	A	A	B	B	B	A	B	A	B	X	B	B	B	B	A	A	B	B	A	A	A	B	B	A	B	A	A	A	X	B	A	A	A	X	B	A	B	B
GM01:47947628	A	B	B	A	B	A	A	A	B	B	B	A	A	B	B	B	A	B	A	B	X	B	B	B	B	A	A	B	B	A	A	A	B	B	A	B	A	A	A	X	B	A	A	A	X	B	A	B	B
GM01:48514581	A	B	B	A	B	A	A	A	B	B	B	A	A	B	B	B	B	B	A	B	B	B	B	B	B	A	A	B	B	A	A	A	A	B	A	B	A	A	A	X	B	A	A	A	X	B	A	B	B
GM01:48605841	A	B	B	A	B	A	A	A	B	B	B	A	A	B	B	B	B	B	A	B	B	B	B	B	B	A	A	B	B	A	A	A	A	B	A	B	A	A	A	A	B	A	A	A	X	B	A	B	B
GM01:49321456	A	B	B	X	B	B	A	A	B	B	B	A	A	B	B	X	B	B	A	B	B	B	B	B	B	A	A	B	B	A	A	A	A	B	A	B	A	A	B	A	B	A	A	A	B	B	A	B	B
GM01:51080932	B	B	B	B	B	B	A	A	B	B	B	A	B	B	B	B	B	B	B	A	B	B	B	B	B	B	A	B	A	A	A	A	A	B	A	A	A	A	B	A	B	A	B	A	A	A	A	B	B
GM01:51122319	B	B	B	B	B	B	A	A	B	B	B	A	B	B	B	B	B	A	B	A	B	B	B	B	B	A	B	X	A	A	A	A	A	B	A	A	A	A	B	A	B	A	B	X	A	A	A	B	B
GM01:51166859	B	B	B	B	B	B	A	A	B	B	B	A	B	B	B	B	B	B	B	A	B	B	B	B	B	X	B	B	A	X	A	A	A	B	A	A	A	A	B	A	B	A	B	A	A	A	A	B	B
GM01:51393033	B	B	B	A	B	B	A	A	B	B	B	A	B	B	B	B	B	B	B	A	A	B	B	B	B	A	X	B	A	A	A	A	A	B	A	A	A	A	B	A	B	A	B	X	A	A	A	B	B
GM01:51516538	B	B	B	B	B	B	A	A	B	B	B	A	B	B	B	B	B	A	B	A	A	B	B	B	B	A	X	X	A	A	A	A	A	B	A	B	A	A	B	A	B	A	B	X	A	A	A	B	B
GM01:51517082	B	B	B	B	B	B	A	A	B	B	B	A	B	B	B	B	B	A	B	A	A	B	B	B	B	A	A	X	A	A	A	A	A	B	A	A	A	A	B	A	B	A	B	A	A	A	A	B	B
GM01:51589860	B	B	B	X	B	B	A	A	B	B	B	A	B	B	B	B	B	B	B	A	B	B	B	B	B	A	A	B	A	A	A	A	A	B	A	A	A	A	B	A	B	A	B	A	A	A	A	B	B
GM01:51619343	B	B	B	B	B	B	A	A	B	B	B	A	B	B	B	B	B	A	B	A	B	B	B	B	B	A	A	A	A	A	A	A	A	B	A	A	A	A	B	A	B	A	B	A	A	A	A	B	B
GM01:51640106	B	B	B	X	B	B	A	A	B	B	B	A	B	B	B	B	B	B	B	A	B	B	B	B	B	A	A	B	A	A	A	A	A	B	B	A	A	A	B	A	B	A	B	X	A	A	A	B	B
GM01:51764985	B	B	B	X	B	B	A	A	B	B	B	A	B	B	B	B	B	A	B	A	B	B	B	B	B	X	X	X	A	A	A	A	A	B	X	A	A	A	B	A	B	A	B	X	A	A	A	B	B
GM01:51783190	B	B	B	X	B	B	A	A	B	B	B	A	B	B	B	B	B	A	B	A	B	B	B	B	B	A	B	X	A	A	A	A	A	B	B	A	A	A	B	A	B	A	B	A	A	A	A	B	B
GM01:51796787	B	B	B	X	B	B	A	A	B	B	B	A	B	B	B	B	B	A	B	A	B	B	B	B	B	A	A	X	A	A	A	A	A	B	X	A	A	A	B	A	B	A	B	B	A	A	A	B	B
GM01:51814345	B	B	B	B	B	B	A	A	B	B	B	A	B	B	B	B	B	B	B	A	B	B	B	B	B	A	A	X	A	A	A	A	A	B	B	A	A	A	B	A	B	A	B	B	A	A	A	B	B
GM01:52256221	B	B	B	X	B	B	A	A	B	B	B	A	B	B	B	B	B	B	B	A	A	B	B	A	B	A	A	B	A	A	B	A	A	B	B	A	A	A	A	A	B	A	B	B	A	A	A	B	A
GM01:52517162	B	B	B	B	B	B	A	A	B	B	B	A	B	B	A	B	A	A	B	A	B	B	B	A	B	A	A	B	A	A	A	A	A	A	B	A	A	A	B	A	B	A	B	A	A	A	A	B	A
GM01:52567563	X	B	B	A	A	B	A	A	B	B	B	A	B	X	A	B	A	A	B	A	B	B	B	A	B	A	A	B	A	A	A	A	A	A	B	A	A	A	B	A	B	A	B	A	A	A	A	B	A
GM01:52567721	X	B	B	A	A	B	A	A	B	B	B	A	B	X	A	B	A	A	B	A	B	B	B	A	B	A	A	B	A	A	A	A	A	A	B	A	A	A	B	A	B	A	B	A	A	A	A	B	A
GM01:53065563	A	B	B	A	A	B	A	A	B	B	A	A	B	X	A	X	A	A	B	A	B	B	B	A	B	A	A	B	A	A	A	A	A	A	B	A	A	A	B	A	B	A	B	A	A	A	A	B	A
GM01:54467121	A	B	B	A	A	A	B	A	B	B	A	A	B	A	A	A	A	A	B	A	B	A	B	A	B	A	A	B	A	A	B	A	A	A	B	A	A	X	B	A	B	A	B	A	A	A	A	A	A
GM01:54489344	A	B	B	A	A	A	B	A	B	B	A	A	B	A	A	A	A	A	B	A	B	A	B	A	B	A	A	B	A	A	B	A	A	A	B	A	A	A	B	A	B	A	B	A	A	A	A	A	A
GM02:267026	A	B	B	B	B	X	A	A	B	A	A	A	A	A	A	B	B	B	B	B	B	A	B	A	A	A	A	X	A	A	A	B	B	A	A	B	A	B	A	A	A	B	A	A	A	B	A	B	A
GM02:599062	A	B	B	B	B	B	A	A	B	A	A	B	A	A	B	B	B	B	B	B	B	A	B	A	A	A	A	X	A	A	A	B	B	A	A	B	A	B	A	A	A	B	A	A	A	B	A	B	A
GM02:720173	A	B	A	B	B	X	A	A	B	A	A	X	A	A	B	B	B	B	B	B	B	A	B	A	A	A	A	X	A	A	A	B	B	A	B	A	A	B	A	A	A	B	A	A	A	B	A	B	A
GM02:1041040	A	B	A	B	B	X	A	X	B	A	A	X	A	A	X	B	B	B	B	B	B	A	B	A	A	A	A	A	A	A	A	B	B	A	A	A	A	B	A	A	A	B	A	A	A	B	A	B	A
GM02:1094472	A	B	A	B	B	B	A	X	B	A	A	X	A	A	B	B	B	B	B	B	B	A	B	A	A	A	A	A	A	A	A	B	B	A	X	B	A	B	A	A	A	B	A	A	A	B	A	B	A
GM02:1138834	A	B	A	B	B	B	A	A	B	A	A	X	A	A	B	B	B	B	B	B	B	A	B	A	A	A	A	A	A	A	A	B	B	A	B	A	A	B	A	A	A	A	A	A	A	B	A	B	A
GM02:1364469	A	B	A	B	B	X	A	A	B	A	A	A	A	A	X	B	B	B	B	B	B	A	B	A	A	A	A	A	A	A	A	B	B	A	A	A	A	B	A	A	A	A	A	A	A	B	A	B	A
GM02:1387928	A	B	A	B	B	B	A	X	B	A	A	X	A	A	B	B	B	B	B	B	B	A	B	A	A	A	A	A	A	A	A	B	B	A	B	A	A	B	A	A	A	B	A	A	A	B	A	B	A
GM02:1479035	A	B	A	B	B	X	A	A	B	A	A	A	A	A	B	B	B	B	B	B	B	A	B	A	A	A	A	A	A	A	A	B	B	A	B	A	A	B	A	A	A	B	A	A	A	B	A	B	A
GM02:1507543	A	B	A	B	B	B	A	X	B	A	A	A	A	A	B	B	B	B	B	B	B	A	B	A	A	A	A	A	A	A	A	B	B	A	B	A	A	B	A	A	A	B	A	A	A	B	A	B	A
GM02:1544221	A	B	A	B	B	X	A	X	B	A	A	X	A	A	B	B	B	B	B	B	B	A	B	A	A	A	A	A	A	A	A	B	B	A	B	A	A	B	A	A	A	X	A	A	A	B	A	B	A
GM02:1931029	A	B	A	B	B	B	A	A	B	A	A	A	A	A	B	B	B	B	B	B	B	A	B	A	A	A	A	A	A	A	A	A	B	A	X	A	A	B	A	A	A	A	A	A	A	B	A	B	A
GM02:2187701	A	B	A	X	A	B	A	B	B	A	A	A	A	A	B	B	X	B	B	B	B	A	B	A	B	A	A	A	A	A	A	A	B	A	A	A	A	B	A	A	B	A	A	A	A	B	A	B	A
GM02:2187895	A	B	A	A	A	B	A	B	B	A	A	A	A	A	B	B	X	B	B	B	B	A	B	A	B	A	A	A	A	A	A	A	B	A	A	B	A	B	A	A	B	A	A	A	A	B	A	B	A
GM02:2212910	A	B	X	B	A	B	A	B	B	A	A	X	A	A	B	B	X	B	B	B	B	A	B	A	B	B	A	A	A	A	A	A	B	A	A	A	A	B	A	A	B	A	A	A	A	B	A	B	A
GM02:2417746	A	B	X	B	B	B	A	B	B	A	A	X	A	A	A	B	X	B	B	B	A	A	B	A	B	A	A	A	A	A	A	A	A	A	A	A	A	B	A	A	B	A	A	A	A	B	A	B	A
GM02:2418026	A	B	A	X	B	A	A	B	B	A	A	X	A	A	A	B	A	B	B	B	A	A	B	A	B	A	A	A	A	A	A	A	A	A	A	A	A	B	A	A	B	A	A	A	A	B	A	B	A
GM02:2420237	A	B	X	B	A	X	A	B	B	A	A	X	A	A	A	B	A	B	B	B	A	A	B	A	B	A	A	A	A	A	A	A	A	A	A	A	A	B	A	A	B	A	A	A	A	B	A	B	A
GM02:2423804	A	B	X	X	A	X	A	B	A	A	A	X	A	A	A	B	X	B	B	B	A	A	B	A	B	A	A	A	A	A	A	A	A	A	B	A	A	B	A	A	B	A	A	A	A	B	A	B	A
GM02:2504452	A	B	X	B	A	B	A	B	A	A	A	X	A	A	A	B	X	B	B	B	A	A	B	A	B	A	A	A	A	A	A	A	A	A	X	A	A	B	A	A	B	A	A	A	A	B	A	B	A
GM02:2781300	A	B	A	A	A	A	A	B	A	A	A	A	A	A	A	B	A	B	B	B	A	A	B	A	B	A	A	A	A	A	A	A	A	A	A	A	A	B	A	A	B	A	A	A	A	B	A	B	A
GM02:2929134	A	A	A	B	X	B	A	B	A	A	A	X	A	A	A	B	B	B	B	X	A	A	B	A	B	A	A	A	A	A	A	A	A	A	A	A	A	B	A	A	B	A	A	A	A	B	A	B	A
GM02:3135678	A	A	A	B	A	B	A	B	A	A	A	X	A	A	A	B	B	B	B	X	A	A	B	A	B	A	A	A	A	A	A	A	A	A	A	A	A	B	A	A	B	A	A	A	A	B	A	B	A
GM02:3195491	A	A	A	B	A	B	A	B	A	A	A	B	A	A	A	B	B	B	B	X	A	A	B	A	B	A	A	A	A	A	A	A	A	A	A	A	A	B	A	A	B	A	A	A	A	B	A	B	A
GM02:3212957	A	A	X	B	A	A	A	B	X	A	A	B	A	A	A	B	B	B	B	X	A	A	B	A	B	A	A	A	A	A	A	A	A	A	B	A	A	B	A	A	B	A	A	A	A	B	A	B	A
GM02:3264767	A	A	A	B	A	X	A	B	A	A	A	X	A	A	A	B	A	B	B	X	A	A	B	A	B	A	A	A	A	A	A	A	A	A	B	A	A	B	A	A	B	A	A	A	A	B	A	B	A
GM02:3323346	A	A	X	B	A	X	A	B	X	A	A	B	A	A	A	B	B	B	B	A	A	A	B	A	B	A	A	A	A	A	A	A	A	A	B	A	A	B	A	A	B	A	A	A	A	B	A	B	A
GM02:3397167	A	A	A	X	B	B	A	B	X	A	A	X	A	A	A	B	A	B	B	A	A	A	B	A	B	A	A	A	A	A	A	A	A	A	A	A	A	B	A	A	B	A	A	A	A	B	A	B	A
GM02:3432031	A	A	X	B	B	B	A	B	B	A	A	A	A	A	A	B	X	B	B	A	A	A	B	A	B	A	A	A	A	A	A	A	A	A	B	A	A	B	A	A	B	A	A	A	A	B	A	B	A
GM02:3432083	A	A	B	B	B	B	A	B	B	A	A	A	A	A	A	B	B	B	B	A	A	A	B	A	B	A	A	A	A	A	A	A	A	A	B	A	A	B	X	A	B	A	A	A	A	B	A	B	A
GM02:3432500	A	A	A	B	B	B	A	B	A	A	A	X	A	A	A	B	A	B	B	A	A	A	B	A	B	A	A	A	A	A	A	A	A	A	A	A	A	B	A	A	B	A	A	A	A	B	A	B	A
GM02:3432660	A	A	X	B	B	B	A	B	X	A	A	X	A	A	A	B	X	B	B	X	A	A	B	A	B	A	A	A	A	A	A	A	A	A	B	A	A	B	A	A	B	A	A	A	A	B	A	B	A
GM02:3530330	A	A	B	B	B	B	A	B	A	A	A	B	A	A	A	B	A	B	B	A	A	A	B	A	B	A	A	A	A	A	A	A	A	A	A	A	A	B	A	A	B	A	A	A	A	B	A	B	A
GM02:3573107	A	A	B	B	B	B	A	B	X	A	A	X	A	A	A	B	B	B	B	A	A	A	B	A	X	A	A	A	A	A	A	A	A	A	A	A	A	B	A	A	B	A	A	A	A	B	A	B	A
GM02:3619567	A	A	B	B	B	B	A	B	X	A	A	X	A	A	A	B	B	B	B	B	A	A	B	A	A	A	A	A	A	A	A	A	A	A	A	A	A	B	A	A	B	A	A	A	A	B	A	B	A
GM02:3621233	A	A	A	A	B	B	A	B	A	A	A	X	A	A	A	B	A	B	B	A	A	A	B	A	A	A	A	A	A	A	A	A	A	A	B	A	A	B	A	A	B	A	A	A	A	B	A	B	A
GM02:3935983	A	A	X	B	B	B	A	B	A	A	A	X	A	A	A	B	B	B	B	X	A	A	B	A	A	A	A	A	A	A	A	A	A	A	X	A	A	B	A	A	B	A	A	A	A	A	A	B	A
GM02:4022485	A	A	A	B	B	B	A	B	X	A	A	X	A	B	A	B	B	B	B	A	A	A	B	A	A	B	A	A	A	A	A	A	A	A	B	A	A	B	A	A	B	A	A	A	A	A	A	B	A
GM02:4038960	A	A	B	B	B	B	A	B	X	A	A	A	A	B	A	B	B	B	B	A	A	A	B	A	A	B	A	A	A	A	A	A	A	A	A	A	A	B	A	A	B	A	A	A	A	A	A	B	A
GM02:4054885	A	A	X	B	B	B	A	B	A	A	A	A	A	B	A	B	B	B	B	A	A	A	B	A	A	B	A	A	A	A	A	A	A	A	B	A	A	B	A	A	B	A	A	A	A	A	A	B	A
GM02:4282083	A	A	X	B	B	B	A	B	A	A	A	X	A	B	A	A	B	B	B	A	A	A	B	A	A	B	A	A	A	A	A	A	A	A	A	A	A	B	A	A	B	A	A	A	A	A	A	B	A
GM02:4345911	A	A	X	B	B	B	A	B	A	A	A	X	A	B	A	A	B	B	B	A	A	A	B	A	A	B	A	A	A	A	A	A	A	A	A	A	A	B	A	A	B	A	A	A	A	A	A	B	A
GM02:4413053	A	A	X	B	B	B	A	B	A	A	A	X	A	A	A	A	B	B	B	A	A	A	B	A	A	B	A	A	A	X	A	A	A	A	A	A	A	B	A	A	B	A	A	A	A	A	A	B	A
GM02:4517364	A	A	A	B	B	B	A	B	A	A	A	A	A	B	A	A	B	B	B	A	A	A	A	A	A	B	A	A	A	X	A	A	A	A	A	A	A	B	A	A	B	A	A	A	A	A	A	B	A
GM02:4796148	A	A	A	B	B	B	A	B	X	A	A	X	A	A	A	A	B	B	B	X	A	A	A	A	A	B	A	A	A	X	A	A	A	A	A	A	A	B	A	A	B	A	A	A	A	A	A	B	A
GM02:4873043	A	A	A	B	B	B	A	B	X	A	A	B	A	X	A	A	B	B	B	A	A	A	A	A	A	B	A	A	A	X	A	A	A	A	A	A	A	B	A	A	B	A	A	A	A	A	A	B	A
GM02:4876444	A	A	X	B	B	B	A	B	X	A	A	X	A	X	A	A	B	B	B	A	A	A	A	A	A	B	A	A	A	X	A	A	A	A	A	A	A	B	A	A	B	A	A	A	A	A	A	B	A
GM02:4961622	A	A	X	B	B	B	A	B	A	A	A	X	A	A	A	A	B	B	B	A	A	A	A	A	A	B	A	A	A	A	A	A	A	A	A	A	A	B	X	A	B	A	A	A	A	A	A	B	A
GM02:5059318	A	A	B	B	B	B	A	B	B	A	A	B	A	B	A	A	B	B	B	B	A	A	A	A	A	B	A	A	A	X	A	A	A	A	A	A	A	B	B	A	B	A	A	A	A	A	A	B	A
GM02:5250738	A	A	A	A	B	B	A	B	A	A	A	A	A	A	A	A	B	B	B	A	A	A	A	A	A	B	A	A	A	X	A	A	A	A	A	A	A	B	B	A	B	A	A	A	A	A	A	B	A
GM02:5306657	A	A	A	A	B	X	A	B	A	A	A	A	A	A	A	A	B	B	B	A	A	A	A	A	A	B	A	A	A	B	A	A	A	A	A	A	A	B	B	A	B	A	A	A	A	A	A	B	A
GM02:5486286	A	A	B	A	B	B	A	B	X	A	A	X	A	B	A	A	B	B	B	B	A	A	A	A	A	B	A	A	A	B	A	A	A	A	A	A	A	B	B	A	B	A	A	A	A	A	A	B	A
GM02:5723921	A	A	X	A	X	B	A	B	A	A	A	A	A	A	A	A	B	B	B	A	A	A	A	A	A	B	A	A	A	B	A	A	A	A	A	A	A	B	B	A	B	A	A	A	A	A	A	B	A
GM02:5724021	A	A	B	A	B	B	A	B	B	A	A	B	A	A	A	A	B	B	B	A	A	A	A	A	A	B	A	A	A	B	A	A	A	A	A	A	A	B	B	A	B	A	A	A	A	A	B	B	A
GM02:5917907	A	A	A	A	X	B	A	B	A	A	A	A	A	B	A	A	B	B	B	A	A	A	A	A	A	B	A	A	A	B	A	A	A	A	A	A	A	B	B	A	B	A	A	A	A	A	B	B	A
GM02:5929785	A	A	X	A	X	B	A	B	A	A	A	A	A	B	A	A	B	B	B	A	A	A	A	A	A	B	A	A	A	B	A	A	A	A	A	A	A	B	B	A	B	A	A	A	A	A	B	B	A
GM02:6015651	A	A	X	A	A	B	A	B	A	A	A	A	A	A	A	A	B	B	B	A	A	A	A	A	A	B	A	A	A	B	A	A	A	A	A	A	A	B	B	A	B	A	A	A	A	A	X	B	A
GM02:6249132	A	A	X	A	B	B	A	B	X	A	A	B	A	B	A	A	B	B	B	B	A	A	A	A	A	B	A	A	A	B	A	A	A	A	A	A	A	B	B	A	B	A	A	A	A	A	B	B	A
GM02:6463681	A	A	X	A	B	B	A	B	B	A	A	B	B	B	A	A	B	B	B	B	A	A	A	A	A	B	A	A	A	B	A	A	A	A	A	A	A	B	B	A	B	A	B	A	A	A	X	B	A
GM02:6486388	A	A	X	A	B	B	A	B	B	A	A	B	B	B	A	A	B	B	B	X	A	A	A	A	A	B	A	A	A	B	A	A	A	A	A	A	A	B	B	A	B	A	B	A	A	A	A	B	A
GM02:6514182	A	A	A	A	B	B	A	B	B	A	A	B	B	B	A	A	B	B	B	X	A	A	A	A	A	B	A	A	A	B	A	A	A	A	A	A	A	B	B	A	B	A	B	A	A	A	A	B	A
GM02:6514719	A	A	B	A	A	B	A	B	B	A	A	B	B	B	A	A	B	B	B	X	A	A	A	A	A	B	A	A	A	B	A	A	A	A	A	A	A	B	B	A	B	A	X	A	A	A	A	B	A
GM02:6959667	A	A	X	B	A	B	A	A	A	A	A	B	B	B	A	A	B	B	B	X	A	A	A	A	A	B	A	A	A	B	A	A	A	A	A	A	A	A	B	A	B	A	X	A	A	A	A	B	A
GM02:7057075	A	A	X	A	A	B	A	A	B	A	A	B	B	A	A	A	B	B	B	X	A	A	A	A	A	B	A	A	A	B	A	A	A	A	A	A	A	A	B	A	B	A	A	A	A	A	A	B	A
GM02:7395052	A	A	X	A	A	B	A	A	A	A	A	B	B	B	A	A	B	B	B	A	A	A	A	A	A	B	A	A	A	B	A	A	A	A	A	A	A	A	B	A	B	A	B	A	B	A	A	B	A
GM02:7405398	A	A	X	A	A	B	X	A	X	A	A	B	B	B	A	A	B	B	B	A	A	A	A	A	A	B	A	A	A	B	A	A	A	A	A	A	A	A	B	A	B	A	B	A	B	A	A	B	A
GM02:7427300	A	A	X	B	A	B	A	A	A	A	A	B	B	A	A	A	B	B	B	A	A	A	A	A	A	B	A	A	A	B	A	A	A	A	A	A	A	A	B	A	B	A	A	A	B	A	A	B	A
GM02:7540996	B	A	B	A	A	B	A	A	X	A	A	B	B	B	A	A	B	B	B	A	A	A	X	A	A	B	A	A	A	B	A	A	A	A	A	A	A	A	B	A	B	A	B	A	X	A	A	B	A
GM02:7929397	X	A	B	B	A	B	A	A	B	A	A	B	B	B	A	A	B	B	B	A	A	A	A	A	A	B	A	A	A	B	A	A	A	A	A	A	A	A	B	A	B	A	B	A	B	A	A	B	A
GM02:7966686	A	A	A	B	A	B	A	A	B	A	A	B	B	B	A	A	B	B	B	A	A	A	A	A	A	B	A	A	A	B	A	A	A	A	A	A	A	A	B	A	B	A	A	A	B	A	A	B	A
GM02:8024857	X	A	B	X	A	B	A	A	X	A	A	B	B	X	A	A	B	B	B	A	A	A	A	A	B	B	A	A	A	B	A	A	A	A	A	A	A	A	B	B	B	A	X	A	B	A	A	B	A
GM02:8025781	A	A	X	A	A	B	A	A	A	A	A	B	B	A	A	A	B	B	B	A	A	A	A	A	B	B	A	A	A	B	A	A	A	A	A	A	A	A	B	B	B	A	A	A	B	A	A	B	A
GM02:8057262	X	A	X	X	A	B	A	A	X	A	A	B	B	X	A	A	B	B	B	A	A	A	A	A	A	B	A	A	A	B	A	A	A	A	A	A	A	A	B	A	B	A	A	A	B	A	A	B	A
GM02:8358296	A	A	A	X	A	A	A	A	X	A	A	B	B	X	A	A	B	B	B	A	A	A	A	A	X	B	A	A	A	B	A	A	A	A	A	A	A	A	B	X	B	A	A	A	B	A	A	B	A
GM02:8378486	X	A	B	B	A	A	A	A	B	A	A	B	B	X	A	A	B	B	B	A	A	A	A	A	X	B	A	A	A	B	A	A	A	A	A	A	A	A	B	X	B	A	A	A	B	A	A	B	A
GM02:8379128	B	A	A	A	A	A	A	A	A	A	A	B	B	A	A	A	B	B	B	A	A	A	A	A	A	B	A	A	A	B	A	A	A	A	A	A	A	A	B	X	B	A	A	A	B	A	A	B	A
GM02:8457165	X	A	X	A	A	A	A	A	B	A	A	B	B	B	A	A	B	B	B	A	A	A	B	A	A	B	A	A	A	B	A	A	A	A	A	A	A	A	B	X	B	A	B	A	B	A	A	B	A
GM02:8544380	X	A	X	A	A	A	A	A	X	A	A	B	B	B	A	A	B	B	B	A	A	A	A	A	A	B	A	A	A	B	A	A	A	A	A	A	A	A	B	X	B	A	B	A	X	A	A	B	A
GM02:8822628	A	A	A	A	A	A	A	A	B	A	A	B	B	A	A	A	B	B	B	A	A	A	A	A	X	B	A	A	A	B	A	A	A	A	A	B	A	A	B	A	B	A	A	A	B	A	A	B	A
GM02:8834850	A	A	A	A	A	A	A	A	B	A	A	B	B	A	A	A	B	B	B	A	A	A	A	A	B	B	A	A	A	B	A	A	A	A	A	A	A	A	B	A	B	A	A	A	B	A	A	B	A
GM02:9019631	A	A	B	X	A	A	A	A	B	A	A	B	B	B	A	A	B	B	B	A	A	A	A	A	B	B	A	A	A	B	A	A	A	A	A	A	A	A	B	A	B	A	X	A	B	A	A	B	A
GM02:9050335	X	A	X	B	A	A	A	A	B	A	A	B	B	X	A	A	B	B	B	A	A	A	A	A	B	B	A	A	A	B	A	A	A	A	A	A	A	A	B	A	B	A	B	A	B	A	A	B	A
GM02:9204140	B	A	A	A	A	A	A	A	B	A	A	B	B	A	A	A	B	B	B	A	A	A	A	A	B	B	A	A	A	B	A	A	A	A	A	A	A	A	B	A	B	A	X	A	B	A	A	B	A
GM02:9374046	A	A	B	B	A	A	A	A	X	A	A	B	B	A	A	A	B	B	B	A	A	A	A	A	B	B	A	A	A	B	A	A	A	A	A	A	A	A	B	A	B	A	A	A	B	A	A	B	A
GM02:9453984	X	A	X	B	A	A	A	A	B	A	A	B	B	A	A	A	B	B	B	A	A	A	X	A	B	B	A	A	A	B	A	A	A	A	A	A	A	A	B	X	B	A	X	A	B	A	A	B	A
GM02:10113138	A	A	X	A	A	A	A	A	A	A	A	B	B	A	A	A	B	B	X	A	A	A	X	A	B	B	A	A	A	B	A	A	A	A	A	B	A	A	B	A	B	A	B	A	B	A	A	B	A
GM02:12354352	B	A	B	B	B	A	A	A	A	A	A	B	B	A	A	X	B	B	A	A	B	B	B	B	B	B	A	B	A	B	B	B	B	B	B	B	A	A	B	A	B	B	B	B	B	A	A	B	B
GM02:13694601	B	B	B	B	B	A	A	A	A	A	A	B	B	A	A	A	B	B	A	A	B	B	B	B	B	B	A	B	A	B	B	B	B	B	B	B	A	A	B	A	B	B	B	B	B	B	A	B	B
GM02:13960707	B	B	B	B	B	A	A	A	A	A	B	B	B	A	A	A	B	B	A	A	B	B	B	B	B	B	A	B	A	B	B	B	B	B	B	B	A	A	B	A	B	B	A	B	B	B	A	B	B
GM02:15577839	B	X	A	B	B	B	A	A	A	A	A	B	B	B	A	A	B	B	A	A	B	A	B	B	B	A	A	B	A	A	B	A	B	B	B	B	A	A	A	B	B	A	B	B	B	B	X	B	X
GM02:15633760	B	B	X	B	B	B	A	A	A	A	A	B	A	A	A	A	B	B	A	A	B	A	B	B	B	A	A	B	A	A	B	A	B	B	B	B	A	A	A	B	B	A	A	B	B	B	A	B	X
GM02:15659183	B	X	A	B	B	B	A	A	A	A	B	B	A	A	A	A	B	B	A	A	B	A	B	B	B	A	A	B	A	A	B	A	B	B	B	B	A	A	A	B	B	A	A	B	B	B	A	B	X
GM02:15670768	B	A	A	B	B	B	A	A	A	A	A	B	A	A	A	A	B	B	A	A	B	A	B	B	B	A	A	B	A	A	B	A	B	B	B	B	A	A	A	B	B	A	A	B	B	B	B	B	A
GM02:16185627	B	A	A	B	A	B	A	A	A	A	A	B	A	A	A	A	A	B	A	A	B	A	B	B	B	A	A	B	B	A	B	A	B	B	B	B	A	A	A	B	B	A	A	B	B	B	B	B	A
GM02:16224095	B	A	A	B	A	B	A	A	A	A	A	B	A	A	A	A	B	B	A	A	B	A	B	B	B	A	A	B	B	A	B	A	B	B	B	B	A	A	A	B	B	A	A	B	B	B	A	B	X
GM02:16244390	B	A	A	B	A	B	A	A	A	A	B	B	A	A	A	A	B	B	A	A	B	A	B	B	B	A	A	B	B	A	B	A	B	B	B	B	A	A	A	B	B	A	A	B	B	B	B	B	B
GM02:16482163	B	A	A	B	A	B	A	A	A	A	X	B	A	A	A	A	A	B	A	A	B	A	B	B	B	A	A	B	B	A	B	A	B	B	B	B	A	A	A	B	B	A	A	B	B	B	B	B	X
GM02:16746845	B	A	A	B	A	B	A	A	A	A	X	B	A	A	A	A	A	B	A	A	B	A	B	B	B	A	A	B	B	A	B	A	B	B	B	B	A	A	A	B	B	A	A	B	B	B	X	B	B
GM02:16868176	B	A	A	B	A	B	A	A	A	A	A	B	A	A	A	A	A	B	A	A	B	A	B	B	B	A	A	B	B	A	B	A	B	B	B	B	A	A	A	B	B	A	A	B	B	B	B	B	B
GM02:16940111	B	A	A	B	A	B	A	A	A	A	X	B	A	A	A	A	A	B	A	A	B	A	B	B	B	A	A	B	B	A	B	A	B	B	B	B	A	A	A	B	B	A	A	B	B	B	X	B	A
GM02:16962030	B	A	A	X	A	B	A	A	A	A	A	B	A	A	A	A	A	B	A	A	B	A	B	B	B	A	A	B	X	A	B	A	B	B	B	B	A	A	A	B	B	A	A	B	B	B	A	B	B
GM02:17070109	B	A	A	B	A	B	A	A	A	A	X	B	A	A	A	A	A	B	A	A	B	A	B	B	B	A	A	B	B	A	B	A	B	B	B	B	A	A	A	B	B	A	A	B	B	B	B	B	X
GM02:17260414	B	A	X	B	A	B	A	A	A	A	X	B	A	A	A	A	A	B	A	A	B	A	B	B	B	A	A	B	X	A	B	A	B	B	B	B	A	A	A	B	B	A	A	B	B	B	X	B	X
GM02:17339497	B	A	X	B	A	B	A	A	A	A	A	B	A	A	A	A	A	B	A	A	B	A	B	B	B	A	A	B	X	A	B	A	B	B	B	B	A	A	A	B	B	A	A	B	B	B	A	B	X
GM02:17572331	B	A	A	B	A	B	A	A	A	A	A	B	A	A	A	A	A	B	A	A	B	A	B	B	B	A	A	B	X	A	B	A	B	B	B	B	A	A	A	B	B	A	A	A	B	B	A	B	A
GM02:17694674	B	A	X	B	A	A	A	A	A	A	B	A	A	A	A	A	A	B	A	A	B	A	B	B	B	A	A	B	B	A	B	A	B	B	X	B	A	A	A	B	B	A	A	B	B	B	X	B	A
GM02:17790591	B	A	X	B	A	B	A	A	A	A	B	B	A	A	A	A	A	B	A	A	B	A	B	B	B	A	A	B	B	A	B	A	B	B	B	B	A	A	A	B	B	A	A	B	B	B	B	B	A
GM02:17857707	B	A	A	B	A	B	A	A	A	A	A	B	A	A	A	A	X	B	A	A	B	A	B	B	B	A	A	B	B	A	B	A	B	B	B	B	A	A	A	B	B	A	A	B	B	B	B	B	A
GM02:17918252	B	A	A	B	A	B	A	A	A	A	X	B	A	A	A	A	B	B	A	X	B	A	B	B	B	A	A	B	B	A	B	A	B	B	B	B	A	A	A	B	B	A	A	B	B	B	B	B	A
GM02:18563422	B	A	A	B	A	B	A	A	A	A	B	B	A	A	A	A	B	B	A	A	B	A	B	B	B	A	A	B	B	A	B	A	B	B	B	B	A	A	A	B	B	A	A	B	B	B	A	B	X
GM02:18885215	B	A	A	B	A	B	A	A	A	A	B	B	A	A	A	A	X	B	A	A	B	A	B	B	B	A	A	B	A	A	B	A	B	B	B	B	A	A	A	B	B	A	A	B	B	B	B	B	X
GM02:18916249	B	A	A	B	A	B	A	A	A	A	A	B	X	A	A	A	B	B	A	A	B	A	B	B	B	A	A	B	B	A	B	A	B	B	B	B	A	A	A	B	B	A	A	B	B	B	B	B	X
GM02:19066203	B	A	A	B	A	B	A	A	A	A	X	B	A	A	A	A	A	B	A	A	B	A	B	B	B	A	A	B	B	A	B	A	B	B	B	B	A	A	A	B	B	A	A	B	B	B	B	B	A
GM02:19215547	B	A	A	B	A	B	A	A	A	A	B	B	A	A	A	A	B	B	A	A	B	A	B	B	B	A	A	B	B	A	B	A	B	B	B	B	A	A	A	B	B	A	A	B	B	B	B	B	A
GM02:19505419	B	A	A	B	A	B	A	A	A	A	B	B	A	A	A	A	B	B	A	A	B	A	B	B	B	A	A	B	B	A	B	A	B	B	B	B	A	A	A	B	B	A	A	B	B	B	B	B	A
GM02:19650962	B	A	A	B	A	X	A	A	A	A	B	B	A	A	A	A	A	B	A	A	B	A	B	B	B	A	A	B	B	A	B	A	B	B	B	B	A	A	A	B	B	A	A	B	B	B	X	B	A
GM02:20860914	B	A	A	B	A	B	A	A	A	A	B	B	A	A	A	A	B	B	A	A	B	A	B	B	B	A	A	B	B	A	B	A	B	B	B	B	A	A	A	B	B	A	A	B	B	B	B	B	B
GM02:20947685	B	A	A	B	A	B	A	A	A	A	B	B	A	A	A	A	X	B	A	A	B	A	B	B	B	A	A	B	X	A	B	A	B	B	B	B	A	A	A	B	B	A	A	B	B	B	B	B	B
GM02:21316377	B	A	A	B	A	B	A	A	A	A	B	B	A	A	A	A	X	B	A	A	B	A	B	B	B	A	A	B	B	A	B	A	B	B	B	B	A	A	A	B	B	A	A	B	B	B	B	B	B
GM02:21539238	B	A	A	B	A	B	A	A	A	A	B	B	A	A	A	A	A	B	A	A	B	A	B	B	B	A	A	B	X	A	B	A	B	B	B	B	A	A	A	B	B	A	A	B	B	B	B	B	A
GM02:21657710	B	A	A	B	A	B	A	A	A	A	A	B	A	A	A	A	B	B	A	A	B	A	B	B	B	A	A	B	B	A	B	A	B	B	B	B	A	A	A	B	B	A	A	B	B	B	B	B	B
GM02:21835168	B	A	A	B	A	B	A	A	A	A	B	B	A	A	A	A	X	B	A	A	B	A	B	B	B	A	A	B	B	A	B	A	B	B	B	B	A	A	A	B	B	A	A	A	B	B	B	B	A
GM02:21965440	B	A	A	B	A	B	A	A	A	A	B	B	A	A	A	A	X	B	A	A	B	A	B	B	B	A	A	B	X	A	B	A	B	B	B	B	A	A	A	B	B	A	A	B	B	B	B	B	X
GM02:22058404	B	A	A	B	A	B	A	A	A	A	A	B	A	A	A	A	A	B	A	A	B	A	B	B	B	A	A	B	B	A	B	A	B	B	B	B	A	A	A	B	B	A	A	A	B	B	B	B	A
GM02:22434263	B	A	A	B	A	B	A	A	A	A	B	B	A	A	A	A	A	B	A	A	B	A	B	B	B	A	A	B	A	A	B	A	B	B	B	B	A	A	A	B	B	A	A	A	B	B	B	B	A
GM02:22639930	B	A	A	B	A	B	A	A	A	A	A	B	A	A	A	A	A	B	A	A	B	A	B	B	B	A	A	B	A	A	B	A	B	B	B	B	A	A	A	B	B	A	A	B	B	B	B	B	A
GM02:22665932	B	A	A	B	A	B	A	A	A	A	B	B	A	A	A	A	X	B	A	A	B	A	B	B	B	A	A	B	B	A	B	A	B	B	B	B	A	A	A	B	B	A	A	B	B	B	B	B	A
GM02:23732300	B	A	A	B	A	B	A	A	A	A	X	B	A	A	A	A	B	B	A	A	B	A	B	B	B	A	A	B	B	A	B	A	B	B	B	B	A	A	A	B	B	A	A	B	B	B	A	B	A
GM02:23767287	B	A	A	B	A	B	A	A	A	A	X	B	A	A	A	A	B	B	A	A	B	A	B	B	B	A	A	B	B	A	B	A	B	B	B	B	A	A	A	B	B	A	A	B	B	B	A	B	A
GM02:23775448	B	A	A	B	A	B	A	A	A	A	X	B	A	A	A	A	B	B	A	A	B	A	B	B	B	A	A	B	B	A	B	A	B	B	B	B	A	A	A	B	B	A	A	B	B	B	A	B	A
GM02:24177090	B	A	A	B	A	B	A	A	A	A	B	B	A	A	A	A	B	B	A	A	B	A	B	B	B	A	A	B	B	A	B	A	B	B	B	B	A	A	A	B	B	A	A	B	B	B	B	B	B
GM02:25122832	B	A	A	B	A	B	A	A	A	A	B	B	A	A	A	A	A	B	A	A	B	A	B	B	B	A	A	X	B	A	B	A	B	B	B	B	A	A	A	B	B	A	A	B	B	B	B	B	B
GM02:25138683	B	A	A	B	A	B	A	A	A	A	B	B	A	A	A	A	A	B	A	A	B	X	B	B	B	A	A	X	B	A	B	A	B	B	B	B	A	A	A	B	B	A	A	B	B	B	B	B	A
GM02:25190040	B	A	A	B	A	B	A	A	A	A	X	B	A	A	A	A	A	B	A	A	B	A	B	B	B	A	A	B	B	A	B	A	B	B	B	B	A	A	A	B	A	A	A	B	B	B	B	B	X
GM02:25402585	B	A	A	B	A	B	A	A	A	A	X	B	A	A	A	A	A	B	A	A	B	A	B	B	B	A	A	B	B	A	B	A	B	B	B	B	A	A	A	B	B	A	A	B	B	B	B	B	B
GM02:25454403	B	A	A	B	A	B	A	A	A	A	X	B	A	A	A	A	B	B	A	A	B	A	B	B	B	A	A	B	B	A	B	A	B	B	B	B	A	A	A	B	B	A	A	B	B	B	B	B	A
GM02:25579920	B	A	A	B	A	B	A	A	A	A	B	B	A	A	A	A	B	B	A	A	B	A	B	B	B	A	A	B	B	A	B	A	B	B	B	B	A	A	A	B	B	A	A	B	B	B	B	B	A
GM02:25584369	B	A	A	B	A	B	A	A	A	A	B	B	A	A	A	A	A	B	A	A	B	A	B	B	B	A	A	B	B	A	B	A	B	B	B	B	A	A	A	B	B	A	A	X	B	B	A	B	A
GM02:25623139	B	A	A	B	A	B	A	A	A	A	A	B	A	A	A	A	A	B	A	A	B	A	B	B	B	A	A	B	B	A	B	A	B	B	B	B	A	A	A	B	B	A	A	B	B	B	A	B	A
GM02:25623287	B	A	A	B	A	B	A	A	A	A	B	B	A	A	A	A	B	B	A	A	B	A	B	B	B	A	A	B	B	A	B	A	B	B	B	B	A	A	A	B	B	A	A	B	B	B	A	B	A
GM02:25779265	B	A	A	B	A	B	A	A	A	A	B	B	A	A	A	A	A	B	A	A	B	A	B	B	B	A	A	B	B	A	B	A	B	B	B	B	A	A	A	B	B	A	A	B	X	B	B	B	A
GM02:25834278	B	A	A	B	A	B	A	A	A	A	B	B	A	A	A	A	A	B	A	A	B	A	B	B	B	A	A	B	B	A	B	A	B	B	B	B	A	A	A	B	B	A	A	B	B	B	X	B	A
GM02:25946873	B	A	A	B	A	B	A	A	A	A	A	B	A	A	A	A	A	X	A	A	B	A	B	B	B	A	A	B	B	A	B	A	B	B	B	A	A	A	A	B	B	A	A	B	B	B	A	B	X
GM02:26147198	B	A	A	B	A	B	A	A	A	A	X	B	A	A	A	A	A	B	A	A	B	A	B	B	B	A	A	B	B	A	B	A	B	B	B	B	A	A	A	B	B	A	A	B	B	B	B	B	A
GM02:26213045	B	A	X	B	A	B	A	A	A	A	X	B	A	A	A	A	A	B	A	A	B	A	B	B	B	A	A	B	X	A	B	A	B	B	B	B	A	A	A	B	B	A	A	B	B	B	A	B	A
GM02:26299759	B	A	A	B	A	B	A	A	A	A	X	B	A	A	A	A	A	B	A	A	B	A	B	B	B	A	A	B	B	A	B	A	B	B	B	B	A	A	A	B	B	A	A	B	B	B	B	B	A
GM02:26570585	B	A	A	B	A	B	A	A	A	A	B	B	A	A	A	A	A	B	A	A	B	A	B	B	B	A	A	B	B	A	B	A	B	B	B	B	A	A	A	B	B	A	A	B	B	B	B	B	A
GM02:26786066	B	A	X	B	A	B	A	A	A	A	X	B	X	A	A	A	A	B	A	A	B	A	B	B	B	A	A	B	A	A	B	A	B	B	B	B	A	A	A	B	B	A	A	B	B	B	B	B	A
GM02:39512752	B	A	B	A	A	B	A	A	A	A	A	A	A	A	B	B	A	B	A	A	B	X	B	B	B	A	B	B	B	A	A	A	B	B	B	B	A	A	A	B	B	A	A	A	B	B	B	B	A
GM02:39599912	B	A	B	A	A	B	A	A	A	A	A	A	A	A	B	B	A	B	A	A	B	X	B	B	B	A	B	B	B	A	A	A	B	B	B	B	A	A	A	B	B	A	A	A	B	B	B	B	A
GM02:39888314	B	A	B	A	A	B	A	A	A	A	A	A	A	A	B	B	A	B	A	A	B	A	B	B	B	A	A	B	B	A	A	A	B	B	A	B	A	A	A	B	B	A	A	A	B	B	B	B	A
GM02:40055126	B	A	B	A	A	B	A	A	A	A	A	A	A	A	B	B	A	B	A	A	B	A	B	B	B	A	A	B	B	A	A	A	B	B	A	B	A	A	A	B	B	A	A	A	B	B	B	B	A
GM02:40857727	B	A	B	A	A	B	X	B	A	A	A	A	A	A	B	B	A	B	A	A	B	A	B	B	B	A	A	A	B	A	A	A	B	B	A	B	B	B	A	B	A	A	A	A	B	B	B	B	A
GM02:40882057	B	A	B	A	A	B	X	B	A	A	A	A	A	A	B	B	A	B	A	A	B	A	B	B	B	A	A	A	B	A	A	A	B	B	A	B	B	B	A	B	A	A	A	A	B	B	B	B	A
GM02:41019546	B	A	B	A	A	A	X	B	A	A	A	A	A	A	B	B	A	B	A	A	B	A	B	B	B	A	A	A	A	A	A	A	B	B	A	B	B	B	A	B	A	A	A	A	X	B	B	B	A
GM02:41094092	B	A	B	A	A	A	B	B	A	A	A	A	A	A	B	B	A	B	A	A	B	A	B	B	B	A	A	A	A	A	A	A	B	B	A	B	B	B	A	B	A	A	A	A	B	B	B	B	A
GM02:41097029	B	A	B	A	A	A	X	B	A	A	A	A	A	A	B	B	A	B	A	A	B	A	B	B	B	A	A	A	A	A	A	A	B	B	A	B	B	B	A	B	A	A	A	A	B	B	B	B	A
GM02:41112023	B	A	B	A	A	X	B	B	A	A	A	A	A	A	B	B	A	B	A	A	B	A	B	B	B	A	A	A	A	A	A	A	B	B	A	B	B	B	A	B	A	A	A	A	B	B	B	B	A
GM02:41176241	B	A	B	A	A	X	B	B	A	A	A	A	A	A	B	B	A	B	A	A	B	A	B	B	B	A	A	A	A	A	A	A	B	B	A	B	B	B	A	B	A	A	B	A	X	B	B	B	A
GM02:41182686	B	A	B	A	A	A	A	B	A	A	A	A	A	A	B	B	A	B	A	A	B	A	B	B	B	A	A	A	A	A	A	A	B	B	A	B	B	B	A	B	A	A	B	A	B	B	A	B	A
GM02:41211429	B	A	B	A	A	A	A	B	A	A	A	A	A	A	B	B	A	B	A	A	B	A	B	B	B	A	A	A	A	A	A	A	B	B	A	A	B	X	A	B	A	A	B	A	B	B	B	B	A
GM02:41211627	B	A	B	A	A	A	X	B	A	A	A	A	A	A	B	B	A	B	A	A	B	A	B	B	B	A	A	A	A	A	A	A	B	B	A	B	B	X	A	B	A	A	B	A	B	B	B	B	A
GM02:41263104	B	A	B	A	A	A	X	B	A	A	A	A	A	A	B	B	A	B	A	A	B	A	B	B	B	A	A	A	A	A	B	A	B	B	A	B	B	B	A	B	A	A	B	A	B	B	B	B	A
GM02:41304291	B	A	B	A	A	A	X	B	A	A	A	A	A	A	B	B	A	B	A	A	B	A	B	B	B	A	A	A	A	A	A	A	B	B	A	B	B	B	A	B	A	A	B	A	B	B	B	B	A
GM02:41388660	B	A	B	A	A	A	A	B	A	A	A	A	A	A	B	B	A	B	A	A	B	A	B	B	B	A	A	A	A	A	A	A	B	B	A	B	B	X	A	B	A	A	B	A	B	B	B	B	A
GM02:41734782	B	A	B	A	A	X	X	B	A	A	A	A	A	A	B	B	A	B	A	A	B	A	B	B	B	A	B	A	A	A	A	A	B	B	A	B	B	B	A	B	A	A	B	A	B	B	B	B	A
GM02:42304323	B	B	B	A	A	A	B	B	A	A	A	A	A	A	B	B	A	B	A	A	B	A	B	B	X	A	B	A	A	A	A	A	B	B	A	B	B	B	A	B	A	A	B	A	B	B	B	B	A
GM02:42330047	B	B	B	A	A	A	X	B	A	A	A	A	A	A	B	B	A	B	A	A	B	A	B	B	A	A	B	A	A	A	A	A	B	B	A	B	B	B	A	B	A	A	B	A	B	B	B	B	A
GM02:42370173	B	B	B	A	A	X	B	B	A	A	A	A	A	A	B	B	A	B	A	A	B	A	B	B	A	A	X	A	A	A	A	A	B	B	A	B	B	B	A	B	A	A	B	A	B	B	B	B	A
GM02:42411031	B	B	B	A	A	A	X	B	A	A	A	A	A	A	B	B	A	B	A	A	B	A	B	B	A	A	X	A	A	A	A	A	B	B	A	B	B	B	A	B	A	A	B	A	B	B	B	B	A
GM02:42436939	B	B	B	A	A	A	A	B	A	A	A	A	A	A	B	B	A	B	A	A	B	A	B	B	A	A	A	A	A	A	A	A	B	B	A	B	B	B	A	B	A	A	B	A	B	B	B	B	A
GM02:42599413	B	B	B	A	A	A	B	B	A	A	A	A	A	A	B	B	A	B	A	A	B	A	B	B	A	A	B	A	A	A	A	A	B	B	A	B	B	B	A	B	A	A	B	A	B	B	B	B	A
GM02:42647500	B	B	B	A	A	A	A	B	A	A	A	A	A	A	B	B	A	B	A	A	B	A	B	B	A	A	A	A	A	A	A	A	B	B	A	B	B	B	A	B	A	A	B	A	B	B	B	B	A
GM02:42665680	B	B	B	A	A	A	B	B	A	A	A	A	A	A	B	B	A	B	A	A	B	A	B	B	A	A	A	A	A	A	A	A	B	B	A	B	B	B	A	B	A	A	B	A	B	B	B	B	A
GM02:42688716	B	B	B	A	A	A	B	B	A	A	A	A	A	A	B	B	A	B	A	A	B	A	B	B	A	A	B	A	A	A	A	A	B	B	A	B	B	B	A	B	A	A	B	A	X	B	B	B	A
GM02:42742595	B	B	B	A	A	A	X	B	A	A	A	A	A	A	B	B	A	B	A	A	B	A	B	B	A	A	B	A	A	A	A	A	B	B	A	X	B	B	A	B	A	A	B	A	B	B	B	B	A
GM02:42747704	B	B	B	A	A	A	A	B	A	A	A	A	A	A	B	B	A	B	A	A	B	A	B	B	A	A	B	A	A	A	A	A	B	B	A	B	B	B	A	B	A	A	B	A	B	B	B	B	A
GM02:45687831	B	B	B	A	A	A	B	A	A	B	A	A	B	A	B	B	A	B	B	B	B	A	B	A	A	A	B	A	X	A	B	A	B	B	B	A	B	B	B	B	A	X	B	B	B	B	B	B	A
GM02:46648011	B	B	A	B	A	A	A	A	A	B	A	A	B	A	B	B	B	B	B	B	A	A	A	A	A	A	B	A	B	A	B	B	X	B	B	A	B	B	B	B	B	B	B	B	B	B	B	B	A
GM02:46714310	B	B	A	A	A	A	A	A	A	B	A	A	B	A	B	B	A	B	B	B	A	A	A	A	A	A	B	A	B	A	B	B	B	B	B	A	B	B	B	B	B	B	B	B	B	B	B	B	A
GM02:46724057	B	B	A	A	A	A	A	A	A	B	A	A	B	A	B	B	A	B	B	B	A	A	A	A	A	A	B	A	B	A	B	B	B	B	B	A	B	B	B	B	X	B	B	B	B	B	B	B	A
GM02:47504573	A	A	A	B	B	A	B	B	A	B	A	A	B	B	B	B	B	B	B	B	A	A	A	X	A	A	B	A	A	A	A	B	B	B	B	A	B	B	B	B	B	B	B	B	B	B	B	B	B
GM02:47504826	A	A	A	B	B	A	B	B	A	B	A	A	B	B	B	B	B	B	B	B	A	A	A	X	A	A	B	A	A	A	A	B	B	B	B	A	B	B	B	B	X	B	B	B	B	B	B	B	B
GM02:47519786	A	A	A	A	X	A	B	B	A	B	A	A	B	B	B	B	A	B	B	B	A	A	A	X	A	A	B	A	A	A	A	B	B	B	B	A	B	B	B	B	X	B	B	B	B	B	B	B	B
GM02:47527596	A	A	A	B	B	A	B	B	A	B	A	A	B	B	B	B	B	B	B	B	A	A	A	X	X	A	B	A	A	A	A	B	B	B	B	A	B	B	B	B	A	B	B	B	B	B	B	B	B
GM02:47532482	A	A	A	B	B	A	B	B	A	B	A	A	B	B	B	B	B	B	B	B	A	A	A	X	A	A	B	A	A	A	A	B	X	B	B	A	B	B	B	B	X	B	B	B	B	B	B	B	B
GM02:47536536	A	A	A	B	B	A	B	B	A	B	A	A	B	B	B	B	B	B	B	B	A	A	A	X	A	A	B	A	X	A	A	B	B	B	B	A	B	B	B	B	A	B	B	B	B	B	B	B	B
GM03:380651	A	B	B	B	A	B	B	A	B	A	B	A	B	A	A	X	B	B	A	A	A	B	A	A	A	B	B	A	B	A	A	B	A	B	A	A	A	A	B	B	B	X	B	B	A	A	A	X	X
GM03:394593	A	B	B	B	A	B	B	A	B	A	B	A	B	A	A	B	B	B	A	A	A	B	A	A	A	B	B	A	B	A	A	B	A	B	A	A	A	A	B	B	B	A	B	B	A	A	A	A	X
GM03:547115	A	B	B	B	A	B	B	A	B	A	B	A	B	A	A	B	B	B	A	A	A	B	A	A	A	B	X	A	B	A	A	B	A	B	A	A	A	A	B	B	B	X	B	B	A	A	A	X	B
GM03:560688	A	B	B	B	X	B	B	A	B	A	B	A	B	A	A	B	B	B	A	X	A	B	B	A	A	B	X	A	B	A	A	B	A	B	A	A	A	A	B	B	B	B	B	B	A	A	A	X	B
GM03:668646	A	B	B	B	A	B	B	A	B	A	B	A	B	A	B	B	B	B	A	A	A	B	A	A	A	B	A	A	A	A	A	B	A	B	A	A	A	A	B	B	B	B	B	B	A	A	A	A	B
GM03:2051434	A	B	B	B	A	A	B	X	B	A	B	A	X	A	B	B	B	B	B	B	A	B	B	A	A	B	B	B	A	A	A	B	A	B	A	A	A	A	B	B	B	B	B	B	A	A	X	A	A
GM03:2411109	A	B	B	B	A	A	B	X	B	A	B	A	X	A	B	B	B	B	B	B	B	B	X	A	A	A	B	B	A	A	A	B	A	B	A	A	A	A	B	B	B	B	B	B	A	A	B	A	A
GM03:2411229	A	B	B	B	A	A	B	X	B	A	B	A	B	A	B	B	B	B	B	B	B	B	A	A	A	A	B	A	A	A	A	B	A	B	A	A	A	A	B	B	B	B	B	B	A	A	A	A	A
GM03:2450947	A	B	B	B	A	A	B	B	B	A	B	A	X	A	B	B	B	B	B	B	B	X	A	A	A	A	B	A	A	A	A	B	A	B	A	A	A	A	B	B	B	B	B	B	A	A	X	X	A
GM03:2560021	A	B	B	B	A	A	B	A	B	A	B	A	A	A	B	B	B	B	B	B	A	B	A	A	A	A	A	A	A	A	A	B	A	B	A	A	A	A	B	B	B	B	X	B	A	A	X	A	A
GM03:3038816	A	B	B	B	B	A	B	A	B	A	B	B	A	A	B	B	B	B	B	B	A	B	X	A	A	A	A	X	A	A	A	B	A	B	A	A	A	A	B	B	A	B	X	B	A	A	X	A	A
GM03:3039628	A	B	B	B	B	A	B	A	B	A	B	A	X	A	B	B	B	B	B	B	A	B	X	A	A	A	A	A	A	A	A	B	A	B	A	A	A	A	B	B	A	B	X	B	A	A	X	A	A
GM03:3056483	A	B	B	B	B	A	B	A	B	A	B	A	X	A	B	B	B	B	B	B	A	B	X	A	A	A	A	A	A	A	A	B	A	B	A	A	A	A	B	B	A	B	B	B	A	A	A	A	A
GM03:3056722	A	B	B	B	B	A	B	A	B	A	B	A	A	A	B	B	B	B	B	B	A	B	X	A	A	A	A	A	A	A	A	B	A	B	A	A	A	A	B	B	A	B	B	B	A	A	A	A	A
GM03:3109688	A	B	B	B	B	A	B	A	B	A	B	A	B	A	B	B	B	B	B	B	A	B	X	A	A	A	A	X	A	A	A	B	A	B	A	A	A	A	B	B	A	B	X	B	A	A	B	B	B
GM03:3149405	A	B	B	B	B	A	B	A	B	A	B	A	B	A	B	B	B	B	B	B	A	X	B	A	A	A	A	A	A	A	A	B	A	B	A	A	A	A	B	B	A	B	B	B	A	A	B	B	B
GM03:3198943	A	B	B	B	B	A	B	A	B	A	B	A	B	A	B	B	B	X	B	B	A	X	X	A	A	A	A	A	A	A	A	B	X	B	A	A	A	A	B	B	A	B	X	B	A	A	A	B	B
GM03:3412373	A	B	B	B	B	A	B	A	B	A	B	A	B	A	B	B	B	X	B	B	A	A	X	A	A	A	A	B	A	A	A	B	A	B	A	A	A	A	B	B	A	B	B	B	A	A	A	X	B
GM03:3419152	A	B	B	B	B	A	B	A	B	A	B	A	X	A	B	B	B	A	B	B	A	X	X	A	A	A	A	A	A	A	A	B	A	B	A	A	A	A	B	B	A	B	B	B	A	A	A	X	B
GM03:3629932	A	B	B	B	B	A	B	A	B	A	B	A	B	A	B	B	B	A	B	B	A	X	X	A	A	A	A	B	A	A	A	B	X	B	A	A	A	A	B	B	A	B	B	B	A	A	B	A	B
GM03:3638005	A	B	B	B	B	A	B	A	B	A	B	A	A	A	B	B	B	A	B	B	A	B	A	A	A	A	A	B	A	A	A	B	B	B	A	A	A	A	B	B	A	B	B	B	A	A	B	A	B
GM03:3665737	A	B	B	B	B	A	B	A	B	A	B	A	A	A	B	B	B	A	B	B	A	B	A	A	A	A	A	B	A	A	A	B	B	B	A	A	A	A	B	B	A	B	B	B	A	A	B	A	B
GM03:3847707	A	B	B	B	B	A	B	A	B	A	B	A	B	A	B	B	B	A	B	B	A	B	A	A	A	A	A	B	A	A	A	B	B	B	A	A	A	A	B	B	A	B	B	B	A	A	B	A	B
GM03:3852804	A	B	B	B	B	A	B	A	B	A	B	A	X	A	B	B	B	A	B	B	A	B	A	A	A	A	A	A	A	A	A	B	A	B	A	A	A	A	B	B	A	B	B	B	A	A	X	A	B
GM03:3853140	A	B	B	B	B	A	B	A	B	A	B	A	A	A	B	B	B	A	B	B	A	B	A	A	A	A	A	X	A	A	A	B	X	B	A	A	A	A	B	B	A	B	B	B	A	A	X	A	B
GM03:3957855	A	B	B	B	B	A	B	A	B	A	B	A	X	A	B	B	B	A	B	B	A	B	A	A	A	A	A	A	A	A	A	B	A	B	A	A	A	A	B	B	A	B	B	B	A	A	A	A	B
GM03:3989295	A	B	B	B	B	A	B	A	B	A	B	A	X	A	B	B	B	A	B	B	A	B	A	A	A	A	A	A	A	A	A	B	X	B	A	A	A	A	B	B	A	B	B	B	A	A	A	A	B
GM03:3992713	A	B	B	B	B	A	B	A	B	A	B	A	B	A	B	B	B	A	B	B	A	B	A	A	A	A	A	B	A	A	A	B	B	B	A	A	A	A	B	B	A	B	B	B	A	A	X	A	B
GM03:3992861	A	B	B	B	B	A	B	A	B	A	B	A	X	A	B	B	B	A	B	B	A	B	A	A	A	A	A	B	A	A	A	B	B	B	A	A	A	A	B	B	A	B	B	B	A	A	X	A	B
GM03:4273101	A	B	B	B	X	A	B	A	B	A	B	A	B	A	B	B	B	A	B	B	A	B	A	A	A	A	A	A	A	A	A	B	X	B	A	A	A	A	B	B	A	B	B	B	A	A	B	A	B
GM03:4740659	A	B	B	B	B	A	B	A	B	A	B	A	B	A	B	B	B	A	B	B	A	B	A	A	A	A	A	B	A	A	A	B	A	B	A	A	A	A	B	B	A	B	B	B	A	A	B	B	B
GM03:4877210	A	B	B	B	B	A	B	A	B	A	B	A	A	A	B	B	B	A	B	B	A	X	A	A	A	A	A	B	A	A	A	B	A	B	A	A	A	A	B	B	A	B	A	B	A	A	A	A	B
GM03:5219991	A	B	B	B	B	A	B	A	B	A	B	A	A	A	B	B	B	A	B	B	A	B	A	A	A	A	A	B	A	A	A	B	A	B	A	A	A	A	B	B	A	B	B	B	A	A	A	B	B
GM03:5220091	A	B	B	B	B	A	B	A	B	A	B	A	A	A	B	B	B	A	B	B	A	B	A	A	A	A	A	B	A	A	A	B	A	B	A	B	A	A	B	B	A	B	B	B	A	A	X	B	B
GM03:5237471	A	B	B	B	B	X	B	A	B	A	B	A	X	A	B	B	B	A	B	B	A	B	A	A	A	A	A	B	A	A	A	B	A	B	A	A	A	A	B	B	A	B	B	B	A	A	X	B	B
GM03:5333088	A	B	B	B	B	A	B	A	B	A	B	A	A	A	B	B	B	A	B	B	A	B	A	A	A	A	A	B	A	A	A	B	A	B	A	A	A	A	B	B	A	B	B	B	A	A	A	B	B
GM03:5333132	A	B	B	B	B	A	B	A	B	A	B	A	A	A	B	B	B	A	B	B	A	B	A	A	A	A	A	B	A	A	A	B	A	B	A	A	A	A	B	B	A	B	B	B	A	A	A	B	B
GM03:5355890	A	B	B	B	B	A	B	A	B	A	B	A	X	A	B	B	B	A	B	B	A	B	A	A	A	A	A	B	A	A	A	B	A	B	A	A	A	A	B	B	A	B	B	B	A	A	A	B	B
GM03:5355902	A	B	B	B	B	A	B	A	B	A	B	A	X	A	B	B	B	A	B	B	A	B	A	A	A	A	A	B	A	A	A	B	A	B	A	A	A	A	B	B	A	B	B	B	A	A	X	B	B
GM03:5368062	A	B	B	B	B	A	B	A	B	A	B	A	X	A	B	B	B	A	B	B	A	B	A	A	A	A	A	B	A	A	A	B	A	B	A	A	A	A	B	B	A	B	B	B	A	A	X	B	B
GM03:5694431	A	B	B	B	B	A	B	A	B	A	B	A	X	A	B	B	B	A	B	B	A	X	A	B	A	A	A	B	A	A	A	B	A	B	A	X	A	A	B	B	A	B	B	B	A	A	B	B	B
GM03:5786218	A	B	B	B	B	A	B	A	B	A	B	A	X	A	B	B	B	A	B	B	A	B	A	B	A	A	A	B	A	A	A	B	A	B	A	A	A	A	B	B	A	B	B	B	A	A	B	B	B
GM03:6002134	A	B	B	B	B	A	B	A	B	A	B	A	A	A	B	B	B	A	B	B	A	A	A	B	A	A	A	B	A	A	A	B	A	B	A	A	A	A	B	B	A	B	X	B	A	A	X	B	B
GM03:6378055	A	B	B	B	B	A	B	A	B	A	B	A	X	A	B	B	B	A	B	B	A	B	A	B	A	A	A	B	A	A	A	B	A	B	A	A	A	A	B	B	A	B	B	B	A	A	B	B	B
GM03:6450610	A	B	B	B	B	A	B	A	B	A	B	A	X	A	B	B	B	A	B	B	A	X	A	B	A	A	A	B	A	A	A	B	A	B	A	A	A	A	B	B	A	B	B	B	A	A	B	B	B
GM03:6529746	A	B	B	B	B	A	B	X	B	A	B	A	A	A	B	B	B	A	B	B	A	B	A	B	A	A	A	B	A	A	A	B	A	B	A	A	A	A	B	B	A	B	B	B	A	A	B	B	B
GM03:6538623	A	B	B	B	B	A	B	A	B	A	B	A	B	A	B	B	B	A	B	B	A	B	A	B	A	A	A	B	A	A	A	B	A	B	A	A	A	A	B	B	A	B	X	B	A	A	B	B	B
GM03:6712517	A	B	B	B	B	A	B	A	B	A	B	A	X	A	B	B	B	A	B	B	A	A	A	B	A	A	A	B	A	A	A	B	A	B	A	X	A	A	B	B	A	B	B	B	A	A	B	B	B
GM03:6730962	A	B	B	B	B	A	B	A	B	A	B	A	B	A	B	B	B	A	B	B	A	X	A	B	A	A	A	B	A	A	A	B	A	B	A	A	A	A	B	B	A	B	B	B	A	A	B	B	B
GM03:6797162	A	B	B	B	B	A	B	A	B	A	B	A	B	A	B	B	B	A	B	B	A	X	A	B	A	A	A	B	A	A	A	B	A	B	A	A	A	A	B	B	A	B	X	B	A	A	A	B	B
GM03:6809980	A	B	X	B	B	A	B	A	B	A	B	A	X	A	B	B	B	A	B	B	A	B	A	B	A	A	A	B	A	A	A	B	A	B	A	A	A	A	B	B	A	B	B	B	A	A	B	B	B
GM03:6810064	A	B	B	B	B	A	B	A	B	A	B	A	X	A	B	B	B	A	B	B	A	B	A	B	A	A	B	B	A	A	A	B	A	B	A	A	A	A	B	B	A	B	X	B	A	A	B	B	B
GM03:6835627	A	B	B	B	B	A	B	A	B	A	B	A	X	A	B	B	B	A	B	B	A	B	A	B	A	A	A	B	A	A	A	B	A	B	A	A	A	A	B	B	A	B	B	B	A	A	B	B	B
GM03:7066902	A	B	B	B	B	A	B	A	B	A	B	A	B	A	B	B	B	A	B	B	A	B	A	B	A	A	A	B	A	A	A	B	A	B	A	A	A	A	B	B	A	B	A	B	A	A	B	B	B
GM03:7455178	A	B	B	B	B	A	B	A	B	A	B	A	X	A	B	B	B	A	B	B	A	B	A	B	A	A	A	B	A	A	A	B	A	B	A	A	A	A	B	B	A	B	B	B	A	A	X	B	B
GM03:7605956	A	B	B	B	B	A	B	A	B	A	B	A	X	A	B	B	B	A	B	B	A	B	A	B	A	A	A	B	A	A	A	B	A	B	A	A	A	A	B	B	A	B	B	B	A	A	A	B	B
GM03:8169063	A	B	B	B	B	A	B	B	B	A	B	A	B	A	B	B	B	A	B	B	A	X	A	B	A	A	A	B	A	A	A	B	A	B	A	A	B	B	B	B	A	B	B	B	A	A	B	B	B
GM03:8267498	A	B	B	B	B	A	B	B	B	A	B	A	X	A	B	B	B	A	B	B	A	B	A	B	A	A	A	B	A	A	A	B	A	B	A	A	B	B	B	B	A	B	B	B	A	A	X	B	A
GM03:8291063	A	B	B	B	B	A	B	B	B	A	B	A	B	A	B	B	B	A	B	B	A	X	A	B	A	A	A	B	A	A	A	B	A	B	A	A	B	B	B	B	A	B	B	B	A	A	B	B	A
GM03:8406909	A	B	B	B	B	A	B	B	B	A	B	A	B	A	B	B	B	A	B	B	A	B	A	B	A	A	A	B	A	A	A	B	A	B	A	A	B	B	B	B	A	B	B	B	A	A	B	B	B
GM03:8408094	A	B	B	B	B	A	B	B	B	A	B	A	B	A	B	B	B	A	B	B	A	B	A	B	A	A	A	B	A	A	A	B	A	B	A	A	B	B	B	B	A	B	B	B	A	A	B	B	B
GM03:8460921	A	B	B	B	B	A	B	B	B	A	B	A	B	A	B	B	B	A	B	B	A	B	A	B	A	A	A	B	A	A	A	B	A	B	A	A	B	B	B	B	A	B	B	B	A	A	X	B	B
GM03:8745356	A	B	B	B	B	A	B	B	B	A	B	A	B	A	B	B	B	A	B	B	A	B	A	B	A	A	A	B	A	A	A	B	A	B	A	A	B	B	B	B	A	B	B	B	A	A	B	B	B
GM03:8783842	A	B	B	B	B	A	B	B	B	A	B	A	A	A	B	B	B	A	B	B	A	B	A	B	A	A	A	B	A	A	A	B	A	B	A	A	B	B	B	B	A	B	X	B	A	A	B	B	B
GM03:8847768	A	B	B	B	B	A	B	B	B	A	B	A	X	A	B	B	B	A	B	B	A	B	A	B	A	A	A	B	A	A	A	B	A	B	A	A	B	B	B	B	A	B	B	B	A	A	B	B	A
GM03:9036562	A	B	B	B	B	A	B	B	B	A	B	A	A	A	B	B	B	A	B	B	A	X	A	B	A	A	A	B	A	A	A	B	A	B	A	A	B	B	B	B	A	B	B	B	A	A	B	B	B
GM03:9040745	A	B	B	B	B	A	B	B	B	A	B	A	B	A	B	B	B	A	B	B	A	B	A	B	A	A	A	B	A	A	A	B	A	B	A	A	B	B	B	B	A	B	X	B	A	A	B	B	B
GM03:9205790	A	B	B	B	B	A	B	B	B	A	B	A	B	A	B	B	B	A	B	B	A	B	A	B	A	A	A	B	A	A	A	B	A	B	A	A	B	B	B	B	A	B	X	B	A	A	X	B	X
GM03:9383656	A	B	B	B	B	A	B	B	B	A	B	A	A	A	B	B	B	A	B	B	A	X	A	B	A	A	A	B	A	A	B	B	A	B	A	A	B	B	B	B	A	B	B	B	A	A	B	B	B
GM03:9422099	A	B	B	B	B	X	B	B	B	A	B	A	A	A	B	B	B	A	B	B	A	X	A	B	A	A	A	B	A	A	B	B	A	B	A	A	B	B	B	B	A	B	B	B	A	A	B	B	B
GM03:9461963	A	B	B	B	A	A	B	B	B	A	B	A	B	A	B	B	B	A	B	B	A	B	A	B	A	A	A	B	A	A	B	B	A	B	A	A	B	B	B	B	A	B	B	B	A	A	B	B	B
GM03:9462237	A	B	B	B	B	A	B	B	B	A	B	A	B	A	B	B	B	A	B	B	A	A	A	B	A	A	A	B	A	A	B	B	A	B	A	A	B	B	B	B	A	B	B	B	A	A	B	B	B
GM03:9704184	A	B	B	B	B	A	B	B	B	A	B	A	X	A	B	B	B	A	B	B	A	X	A	B	A	A	A	B	A	A	B	B	A	B	A	A	B	B	B	B	A	B	B	B	A	A	B	B	X
GM03:10407893	A	B	B	B	B	A	B	B	B	A	B	A	X	A	B	B	B	A	B	B	A	A	A	B	A	A	A	B	A	A	B	B	A	B	A	A	B	B	B	B	A	B	B	B	A	A	B	B	B
GM03:10548519	A	B	B	B	B	A	B	B	B	A	B	A	B	A	B	B	B	A	B	B	A	A	A	B	A	A	A	X	A	A	B	B	A	B	A	A	B	B	B	B	A	B	B	B	A	A	B	B	B
GM03:10811705	A	B	B	B	B	A	B	B	B	A	B	A	B	A	B	B	B	A	B	B	B	X	A	B	A	A	A	B	B	A	B	B	A	B	A	A	B	B	B	B	A	B	B	B	A	A	B	B	B
GM03:10834554	A	B	B	B	B	A	B	B	B	A	B	A	B	A	B	B	B	A	B	B	A	B	A	B	A	A	A	B	A	A	B	B	A	B	A	A	B	B	B	B	A	B	B	B	A	A	B	B	B
GM03:10834651	A	B	B	B	B	X	B	B	B	A	B	A	B	A	B	B	B	A	B	B	A	B	A	B	A	A	A	B	A	A	B	B	A	B	A	A	B	B	B	B	A	B	B	B	A	B	B	B	B
GM03:10836440	A	B	B	B	B	A	B	B	B	A	B	A	B	A	B	B	B	A	B	B	A	B	A	B	A	A	A	B	A	A	B	B	A	B	A	A	B	B	B	B	A	B	B	B	A	A	B	B	X
GM03:10837028	A	B	B	B	B	A	B	B	B	A	B	A	X	A	B	B	B	A	B	B	A	B	A	B	A	A	A	B	A	A	B	B	A	B	A	A	B	B	B	B	A	B	B	B	A	A	B	B	B
GM03:10888994	A	B	B	B	B	A	B	B	B	A	B	A	A	A	B	B	B	A	B	B	A	B	A	B	A	A	A	B	A	A	B	B	A	B	A	A	B	B	B	B	A	B	B	B	A	A	B	B	B
GM03:10936430	A	B	B	B	B	A	B	B	B	A	B	A	B	A	B	B	B	A	B	B	A	B	A	B	A	A	A	B	A	A	B	B	A	B	A	A	B	B	B	B	A	B	X	B	A	A	X	B	B
GM03:10949455	A	B	B	B	B	A	B	B	B	A	B	A	B	A	B	B	B	A	B	B	A	B	A	B	A	A	A	B	A	A	B	B	A	B	A	A	B	B	B	B	A	B	B	B	A	A	X	B	B
GM03:10954484	A	B	B	B	B	A	B	B	B	A	B	A	B	A	B	B	B	A	B	B	A	B	A	B	A	A	A	B	A	A	B	B	A	B	A	A	B	B	B	B	A	B	B	B	A	A	B	B	B
GM03:11039482	A	B	B	B	B	A	B	B	B	A	B	A	B	A	B	B	B	A	B	B	A	B	A	B	A	A	A	B	A	A	B	B	A	B	A	A	B	B	B	B	A	B	B	B	A	A	B	B	B
GM03:11157153	A	B	B	B	B	A	B	B	B	A	B	X	B	A	B	B	B	A	B	B	A	X	A	B	A	A	A	B	A	A	B	B	A	B	A	A	B	B	B	B	A	B	B	B	A	X	X	B	B
GM03:11157651	A	B	B	B	B	X	B	B	B	A	B	A	B	A	B	B	B	A	B	B	A	B	A	B	A	A	B	B	A	A	B	B	A	B	A	A	B	B	B	B	A	B	B	B	A	A	B	B	B
GM03:11158790	A	B	B	B	B	A	B	B	B	A	B	A	X	A	B	B	B	A	B	B	A	B	A	B	A	A	A	B	A	A	B	B	A	B	A	A	B	B	B	B	A	B	A	B	A	A	X	B	B
GM03:11158860	A	B	B	B	B	A	B	B	B	A	B	A	B	A	B	B	B	A	B	B	A	B	A	B	A	A	A	B	A	A	B	B	A	B	A	A	B	B	B	B	A	B	B	B	A	A	B	B	B
GM03:11159116	A	B	B	B	B	A	B	B	B	A	B	A	B	A	B	B	B	A	B	B	A	B	A	B	A	A	A	B	A	A	B	B	A	B	A	A	B	B	B	B	A	B	B	B	A	A	A	B	X
GM03:11159559	A	B	B	B	B	A	B	B	B	A	B	A	A	A	B	B	B	A	B	B	A	A	A	B	A	A	A	B	A	A	B	B	A	B	A	A	B	B	B	B	A	B	B	B	A	A	B	B	B
GM03:11159946	A	B	B	B	B	B	B	B	B	A	B	A	B	A	B	B	B	A	B	B	A	B	A	B	A	A	A	B	A	A	B	B	A	B	A	A	B	B	B	B	A	B	B	B	A	A	B	B	B
GM03:11164052	A	B	B	B	B	A	B	B	B	A	B	A	B	A	B	B	B	A	B	B	A	B	A	B	A	A	A	B	A	A	B	B	A	B	A	A	B	B	B	B	A	B	B	B	A	A	B	B	B
GM03:11164090	A	B	B	B	B	A	B	B	B	A	B	A	B	A	B	B	B	A	B	B	A	B	A	B	A	A	A	B	A	A	B	B	A	B	A	A	B	B	B	B	A	B	A	B	A	A	B	B	B
GM03:11164944	A	B	B	B	B	A	B	B	B	A	B	A	B	A	B	B	B	A	B	B	A	B	A	B	A	A	A	B	A	A	B	B	A	B	A	A	B	B	B	B	A	B	X	B	A	A	A	B	X
GM03:11165356	A	B	B	B	B	A	B	B	B	A	B	A	A	A	B	B	B	A	B	B	A	B	A	B	A	A	A	B	A	A	B	B	A	B	A	A	B	B	B	B	A	B	X	B	A	A	B	B	B
GM03:11165632	A	B	B	B	B	A	B	B	B	A	B	A	B	A	B	B	B	A	B	B	A	B	A	B	A	A	A	B	A	A	B	B	A	B	A	A	B	B	B	B	A	B	A	B	A	A	B	B	X
GM03:11166233	A	B	B	B	B	A	B	B	B	A	B	A	X	A	B	B	B	A	B	B	A	B	A	B	A	A	A	B	A	A	B	B	A	B	A	A	B	B	B	B	A	B	X	B	A	A	B	B	B
GM03:11189361	A	B	B	B	B	A	B	B	B	A	B	A	A	A	B	B	B	A	B	B	A	X	A	B	A	A	A	B	A	A	B	B	A	B	A	A	B	B	B	B	A	B	B	B	A	A	A	B	B
GM03:11189584	A	B	B	B	B	A	B	B	B	A	B	A	X	A	B	B	B	A	B	B	A	B	A	B	A	A	A	B	A	A	B	B	A	B	A	A	B	B	B	B	A	B	B	B	A	A	B	B	B
GM03:11189782	A	B	B	B	B	A	B	B	B	A	B	A	X	A	B	B	B	A	B	B	A	B	A	B	A	A	A	B	A	A	B	B	A	B	A	A	B	B	B	B	A	B	B	B	A	X	B	B	B
GM03:11189813	A	B	B	B	B	A	B	B	B	A	B	A	X	A	B	B	B	A	B	B	A	B	A	B	A	A	A	B	A	A	B	B	A	B	A	A	B	B	B	B	A	B	B	B	A	A	B	B	B
GM03:11189825	A	B	B	B	B	A	B	B	B	A	B	A	X	A	B	B	B	A	B	B	A	B	A	B	A	A	A	B	A	A	B	B	A	B	A	A	B	B	B	B	A	B	B	B	A	A	B	B	B
GM03:11190438	A	B	B	B	B	A	B	B	B	A	B	A	X	A	B	B	B	A	B	B	A	X	A	B	A	A	A	B	A	A	B	B	A	B	A	A	B	B	B	B	A	B	B	B	A	A	X	B	B
GM03:11190588	A	B	B	B	B	A	B	B	B	A	B	A	X	A	B	B	B	A	B	B	A	B	A	B	A	A	A	B	A	A	B	B	A	B	A	A	B	B	B	B	A	B	B	B	A	A	X	B	B
GM03:11190830	A	B	B	B	B	A	B	B	B	A	B	A	X	A	B	B	B	A	B	B	A	X	A	B	A	A	A	B	A	A	B	B	A	B	A	A	B	B	B	B	A	B	B	B	A	A	X	B	B
GM03:11190851	A	B	B	B	B	A	B	B	B	A	B	A	X	A	B	B	B	A	B	B	A	B	A	B	A	A	A	B	A	A	B	B	A	B	A	A	B	B	B	B	A	B	B	B	A	A	B	B	B
GM03:11234971	A	B	B	B	B	A	B	B	B	A	B	A	X	A	B	B	B	A	B	B	A	B	A	B	A	A	A	B	A	A	B	B	A	B	A	A	B	B	B	B	A	B	B	B	A	A	B	B	X
GM03:11271988	A	B	B	B	B	A	B	B	B	A	B	A	B	A	B	B	B	A	B	B	A	B	A	B	A	A	A	B	A	A	B	B	A	B	A	A	B	B	B	B	A	B	B	B	A	A	B	B	B
GM03:11272130	A	B	B	B	B	A	B	B	B	A	B	A	B	A	B	B	B	A	B	B	A	B	A	B	A	A	A	B	A	A	B	B	A	B	A	A	B	B	B	B	A	B	B	B	A	A	B	B	B
GM03:11339462	A	B	B	B	B	A	B	B	B	A	B	A	A	A	B	B	B	A	B	B	A	A	A	B	A	A	A	B	A	A	B	B	A	B	A	A	B	B	B	B	A	B	A	B	A	A	A	B	X
GM03:11402468	A	B	B	B	B	A	B	B	B	A	B	A	A	A	B	B	B	A	B	B	A	B	A	B	A	A	A	B	A	A	B	B	A	B	A	A	B	B	B	B	A	B	A	B	A	A	B	B	B
GM03:11410049	A	B	B	B	B	X	B	B	B	A	B	A	B	A	B	B	B	A	B	B	A	B	A	B	A	A	A	B	A	A	B	B	A	B	A	A	B	B	B	B	A	B	A	B	A	A	X	B	B
GM03:11423777	A	B	B	B	B	A	B	B	B	A	B	A	A	A	B	B	B	A	B	B	A	B	A	B	A	A	A	B	A	A	B	B	A	B	A	A	B	B	B	B	A	B	B	B	A	A	B	B	B
GM03:11429689	A	B	B	B	B	A	B	B	B	A	B	A	A	A	B	B	B	A	B	B	A	A	A	B	A	A	A	B	A	A	B	B	A	B	A	A	B	B	B	B	A	B	A	B	A	A	B	B	B
GM03:11500230	A	B	B	B	B	A	B	B	B	A	B	A	A	A	B	B	B	A	B	B	A	A	A	B	A	A	A	B	A	A	B	B	A	B	A	A	B	B	B	B	A	B	A	B	A	A	B	B	B
GM03:12084081	A	B	B	B	B	A	B	B	B	A	B	A	B	X	B	B	B	A	B	B	A	B	A	B	A	A	A	B	A	A	B	B	A	B	A	A	B	B	B	B	A	B	B	B	A	A	B	B	B
GM03:13107875	A	B	B	B	B	A	B	B	B	A	B	A	B	A	B	B	B	A	B	B	A	B	A	B	A	A	A	B	A	A	B	B	A	B	A	A	B	B	B	B	A	B	B	B	A	A	B	B	B
GM03:13121356	A	B	B	B	B	X	B	B	B	A	B	A	B	A	B	B	B	A	B	B	A	B	A	B	A	A	A	B	A	A	B	B	A	B	A	A	B	B	B	B	A	B	B	B	A	A	B	B	B
GM03:13131273	A	B	B	B	B	A	B	B	B	A	B	A	X	A	B	B	B	A	B	B	A	B	A	B	A	A	A	B	A	A	B	B	A	B	A	A	B	B	B	B	A	B	X	B	A	A	B	B	X
GM03:13195632	A	B	B	B	B	A	B	B	B	A	B	A	B	A	B	B	B	A	B	B	A	B	A	B	A	A	A	B	A	A	B	B	A	B	A	A	B	B	B	B	A	B	B	B	A	A	B	B	B
GM03:13195758	A	B	B	B	B	A	B	B	B	A	B	A	B	A	B	B	B	A	B	B	A	B	A	B	A	A	A	B	A	A	B	B	A	B	A	A	B	B	B	B	A	B	B	B	A	A	A	B	B
GM03:13676434	A	B	B	B	B	A	B	B	B	A	B	A	A	A	B	B	B	A	B	B	A	X	A	B	A	A	A	B	A	A	B	B	A	B	A	A	B	B	B	B	A	B	B	B	A	A	B	B	B
GM03:13928168	A	B	B	B	B	A	B	B	B	A	B	A	A	A	B	B	B	A	B	B	A	A	A	B	A	A	A	B	A	A	B	B	A	B	A	A	B	B	B	B	A	B	A	B	A	A	A	B	B
GM03:14094798	A	B	B	B	B	A	B	B	B	A	B	A	A	A	B	B	B	A	B	B	A	B	A	B	A	A	A	B	A	A	B	B	A	B	A	A	B	B	B	B	A	B	B	B	A	A	B	B	B
GM03:14327259	A	B	B	B	B	A	B	B	B	A	B	A	A	A	B	B	B	A	B	B	A	B	A	B	A	A	A	B	A	A	B	B	A	B	A	A	B	B	B	B	A	B	B	B	A	A	B	B	B
GM03:14328377	A	B	B	B	B	A	B	B	B	A	B	A	A	A	B	B	B	A	B	B	A	B	A	B	A	A	A	B	A	A	B	B	A	B	A	A	B	B	B	B	A	B	B	B	A	A	B	B	B
GM03:14335569	A	B	B	B	B	A	B	B	B	A	B	A	A	A	B	B	B	A	B	B	A	B	A	B	A	A	A	B	A	A	B	B	A	B	A	A	B	B	B	B	A	B	B	B	A	A	B	B	B
GM03:14552166	A	B	B	B	B	A	B	B	B	A	B	A	A	A	B	B	B	A	B	B	A	B	A	B	A	A	A	B	A	A	B	B	A	B	A	A	B	B	B	B	A	B	B	B	A	A	B	B	B
GM03:14566785	A	B	B	B	B	A	B	B	B	A	B	A	B	A	B	B	B	A	B	B	A	B	A	B	A	A	A	B	A	A	B	B	A	B	A	A	B	B	B	B	A	B	B	B	A	A	B	B	B
GM03:14626079	A	B	B	B	B	A	B	B	B	A	B	A	B	A	B	B	B	A	B	B	A	B	A	B	A	A	A	B	A	A	B	B	A	B	A	A	B	B	B	B	A	B	B	B	A	A	B	B	X
GM03:14652967	A	B	B	A	B	A	B	B	B	A	B	A	X	A	B	B	B	A	B	B	A	A	A	B	A	A	A	B	A	A	X	B	A	B	A	A	B	B	B	B	A	B	A	B	A	A	B	A	B
GM03:14653040	A	B	B	B	B	A	B	B	B	A	B	A	A	A	B	B	B	A	B	B	A	A	A	B	A	A	A	B	A	A	B	B	A	B	A	A	B	B	B	B	A	B	A	B	A	A	A	A	A
GM03:14653208	A	B	B	B	B	A	B	B	B	A	B	A	X	A	B	B	B	A	B	B	A	X	A	B	A	A	A	B	A	A	B	B	A	B	A	A	B	B	B	B	A	B	X	B	A	A	B	A	B
GM03:14665091	A	B	B	B	B	A	B	B	B	A	B	A	B	A	B	B	B	A	B	B	A	B	A	B	A	A	A	B	A	A	B	B	A	B	A	A	B	B	B	B	A	B	A	B	A	A	A	B	A
GM03:14797901	A	B	B	B	B	A	B	B	B	A	B	A	B	A	B	B	B	A	B	B	A	A	A	B	A	A	A	B	A	A	B	B	A	B	A	A	B	B	B	B	A	B	B	B	A	A	B	B	B
GM03:14797931	A	B	B	B	B	A	B	B	B	A	B	A	B	A	B	B	B	A	B	B	A	B	A	B	X	A	A	B	X	A	B	B	A	B	A	A	B	B	B	B	A	B	B	B	A	A	X	B	B
GM03:15325353	A	B	B	B	B	A	B	B	B	A	B	A	A	A	X	B	B	A	B	B	A	A	A	B	A	A	A	B	A	A	B	B	A	B	A	A	B	B	B	B	A	B	X	B	A	A	A	B	B
GM03:15326122	A	B	B	B	B	A	B	B	B	A	B	A	X	A	B	B	B	A	B	B	A	A	A	B	A	A	A	B	A	A	B	B	A	B	A	A	B	B	B	B	A	B	X	B	A	A	A	B	X
GM03:15390198	A	B	B	B	B	A	B	B	B	A	B	A	B	A	B	B	B	A	B	B	A	B	A	B	A	A	A	B	A	A	B	B	A	B	A	A	B	B	B	B	A	B	B	B	A	A	B	B	B
GM03:15390406	A	B	B	B	B	A	B	B	B	A	B	A	B	A	B	B	B	A	B	B	A	A	A	B	A	A	A	B	A	A	B	B	A	B	A	A	B	B	B	B	A	B	B	B	A	A	B	B	B
GM03:15390431	A	B	B	B	B	A	B	B	B	A	B	A	A	A	B	B	B	A	B	B	A	X	A	B	A	A	A	B	A	A	B	B	A	B	A	A	B	B	B	B	A	B	X	B	A	A	X	B	X
GM03:15411759	A	B	B	B	B	A	B	B	B	A	B	A	A	A	B	B	B	A	B	B	A	B	A	B	A	A	A	B	A	A	B	B	A	B	A	A	B	B	B	B	A	B	A	B	A	A	A	B	X
GM03:15551908	A	B	B	B	B	A	B	B	B	A	B	A	B	A	B	B	B	A	B	B	A	X	A	B	A	A	A	B	A	A	B	B	A	B	A	A	B	B	B	B	A	B	X	B	A	A	B	B	A
GM03:16253373	A	B	B	B	B	A	B	B	B	A	B	A	B	A	B	B	B	A	B	B	A	B	A	B	A	A	A	B	A	A	B	B	A	B	A	A	B	B	B	B	A	B	B	B	A	A	B	B	B
GM03:16350848	A	B	B	B	B	A	B	B	B	A	B	A	B	A	B	B	B	A	B	B	A	X	A	B	A	A	A	B	A	A	B	B	A	B	A	A	B	B	B	B	A	B	B	B	A	A	B	B	B
GM03:16429572	A	B	B	B	B	A	B	B	B	A	B	A	B	A	B	B	B	A	B	B	A	X	A	B	A	A	A	B	A	A	B	B	A	B	A	A	B	B	B	B	A	B	B	B	A	A	X	B	X
GM03:16430063	A	B	B	B	B	A	B	B	B	A	B	A	X	A	B	B	B	A	B	B	A	B	A	B	A	A	A	B	A	A	B	B	A	B	A	A	B	B	B	B	A	B	B	B	A	A	B	B	B
GM03:16430523	A	B	B	B	B	A	B	B	B	A	B	A	B	A	B	B	B	A	B	B	A	A	A	B	A	A	A	B	A	A	B	B	A	B	A	A	B	B	B	B	A	B	B	B	A	A	X	B	A
GM03:16851619	A	B	B	B	B	A	B	B	B	A	B	A	B	A	B	B	B	A	B	B	A	X	A	B	A	A	A	B	A	A	B	B	A	B	A	A	B	B	B	B	A	B	X	B	A	A	X	B	X
GM03:17391578	A	B	B	B	B	A	B	B	B	A	B	A	B	A	B	B	B	A	B	B	A	B	A	B	A	A	A	B	A	A	B	B	A	B	A	A	B	B	B	B	A	B	B	B	A	A	X	B	X
GM03:17805874	A	B	B	B	B	A	B	B	B	A	B	A	X	A	B	B	B	A	B	B	A	A	A	B	A	A	A	B	A	A	B	B	A	B	A	A	B	B	B	B	A	B	A	B	A	A	X	B	A
GM03:18095439	A	B	B	B	B	A	B	B	B	A	B	A	B	A	B	B	B	A	B	B	A	B	A	B	A	A	A	B	A	A	B	B	A	X	A	A	B	B	B	B	A	B	A	A	A	A	B	B	B
GM03:19302653	A	B	B	B	B	A	B	B	B	A	B	A	B	A	B	B	B	A	B	B	A	B	A	B	A	A	A	B	A	A	B	B	A	A	A	A	B	B	B	B	A	B	A	A	A	A	B	B	B
GM03:19309350	A	B	B	B	B	A	B	B	B	A	B	A	X	A	B	B	B	A	B	B	A	A	A	B	A	A	A	B	A	A	B	B	A	A	A	A	B	B	B	B	A	B	A	A	A	A	B	B	B
GM03:19312080	A	B	B	B	B	A	B	B	B	A	B	A	B	A	B	B	B	A	B	B	A	B	A	B	A	A	A	B	A	A	B	B	A	A	A	A	B	B	B	B	A	B	A	A	A	A	B	B	B
GM03:19451537	A	B	B	B	B	X	B	B	B	A	B	A	B	A	B	B	B	A	B	B	A	B	A	B	A	A	A	B	A	A	B	B	A	A	A	A	B	B	B	B	A	B	B	A	A	A	B	B	B
GM03:19499786	A	B	B	B	B	X	B	B	B	A	B	A	B	A	B	B	B	A	B	B	A	B	A	B	A	A	A	B	A	A	B	B	A	A	A	A	B	B	B	B	A	B	B	A	A	A	B	B	B
GM03:19520870	A	B	B	B	B	X	B	B	B	A	B	A	B	A	B	B	B	A	B	B	A	B	A	B	A	A	A	B	A	A	B	B	A	X	A	A	B	B	B	B	A	B	B	A	A	A	B	B	B
GM03:19850147	A	B	B	B	B	X	B	B	B	A	B	A	A	A	B	B	B	A	B	B	A	B	A	B	A	A	A	B	A	A	B	B	A	A	A	A	B	B	B	B	A	B	B	A	A	A	B	B	B
GM03:20437634	A	B	B	B	B	A	B	B	B	A	B	A	A	A	B	B	B	A	B	B	A	X	A	B	A	A	A	B	A	A	B	B	A	A	A	A	B	B	B	B	A	B	X	A	A	A	X	B	B
GM03:20973179	A	B	B	B	B	A	B	B	B	A	B	A	B	A	B	B	B	A	B	B	A	B	A	B	A	A	A	B	A	A	B	B	A	A	A	A	B	B	B	B	A	B	B	A	A	A	X	B	B
GM03:21449599	A	B	B	B	B	A	B	B	B	A	B	A	B	A	B	B	B	A	B	B	A	B	A	B	A	A	A	B	A	A	B	B	A	A	A	A	B	B	B	B	A	B	B	X	A	A	X	B	B
GM03:21741101	A	B	B	B	B	A	B	B	B	A	B	A	A	A	B	B	B	A	B	B	A	A	A	B	A	A	A	B	A	A	B	B	A	A	A	A	B	B	B	B	A	B	A	A	A	A	A	B	X
GM03:22405454	A	B	B	B	B	A	B	B	B	A	B	A	X	A	B	B	B	A	B	B	A	B	A	B	A	A	A	B	X	A	B	B	A	A	A	A	B	B	B	B	A	B	B	A	A	A	B	B	B
GM03:23317147	A	B	B	B	B	A	B	B	B	A	B	A	X	A	B	B	B	A	B	B	A	X	A	B	A	A	A	B	A	A	B	B	A	A	A	A	B	B	B	B	A	B	B	A	A	A	X	B	B
GM03:23435738	A	B	B	B	B	A	B	B	B	A	B	A	B	A	B	B	B	A	B	B	A	X	A	B	A	A	A	B	A	A	B	B	A	X	A	A	B	B	B	B	A	B	B	A	A	A	X	B	B
GM03:23665812	A	B	B	B	B	A	B	B	B	A	B	A	A	A	B	B	B	A	B	B	A	A	A	B	A	A	A	B	A	A	B	B	A	A	A	A	B	B	B	B	A	B	A	A	A	A	X	B	X
GM03:23683079	A	B	B	B	B	A	B	B	B	A	B	A	B	A	B	B	B	A	B	B	A	B	A	B	A	A	A	B	A	A	B	B	A	A	A	A	B	B	B	B	A	B	B	A	A	A	B	B	B
GM03:24605194	A	B	B	B	B	A	B	B	B	A	B	A	B	A	B	B	B	A	B	B	A	B	A	B	A	A	A	B	A	A	B	B	A	A	A	A	B	B	B	B	A	B	B	A	A	A	B	B	B
GM03:25080888	A	B	B	B	B	A	B	B	B	A	B	A	B	A	B	B	B	A	B	B	A	B	A	B	A	A	A	B	A	A	B	B	A	A	A	A	B	B	B	B	A	B	B	A	A	A	A	B	B
GM03:25842015	A	B	B	B	B	A	B	B	B	A	B	A	B	A	B	B	B	A	B	B	A	B	A	B	A	A	A	B	A	A	B	B	A	A	A	A	B	B	B	B	A	B	A	A	A	A	X	B	B
GM03:25849578	A	B	B	B	B	A	B	B	B	A	B	A	B	A	B	B	B	A	B	B	A	B	A	B	A	A	A	B	A	A	B	B	A	A	A	A	B	B	B	B	A	B	A	A	A	A	X	B	B
GM03:25853410	A	B	B	B	B	A	B	B	B	A	B	A	B	A	B	B	B	A	B	B	A	A	A	B	A	A	A	B	A	A	B	B	A	A	A	A	B	B	B	B	A	B	A	A	A	A	X	B	X
GM03:26225776	A	B	B	B	B	A	B	B	B	A	B	A	B	A	B	B	B	A	B	B	A	B	A	B	A	A	A	B	A	A	B	B	A	A	A	A	B	B	B	B	A	B	B	A	A	A	A	B	B
GM03:26426791	A	B	B	B	B	A	B	B	B	A	B	A	B	A	B	B	B	A	B	B	A	B	A	B	A	A	A	B	A	A	B	B	A	A	A	A	B	B	B	B	A	B	B	A	A	A	A	B	A
GM03:26819959	A	B	B	B	B	A	B	B	B	A	B	A	X	A	B	B	B	A	B	B	A	A	A	B	A	A	A	B	A	A	B	B	A	X	A	A	B	B	B	B	A	X	B	A	A	A	A	B	A
GM03:27330374	A	B	B	B	B	A	B	B	B	A	B	A	B	A	B	B	B	A	B	B	A	A	A	B	A	A	A	B	A	A	B	B	A	X	A	A	B	B	B	B	A	B	B	A	A	A	B	B	B
GM03:27919083	A	B	B	B	B	A	B	B	B	A	B	A	B	A	B	B	B	A	B	B	A	A	A	B	A	A	A	B	A	A	B	B	A	X	A	A	B	B	B	B	A	B	B	A	A	A	B	B	B
GM03:27919170	A	B	B	B	B	A	B	B	B	A	B	A	B	A	B	B	B	A	B	B	A	A	A	B	A	A	A	B	A	A	B	B	A	B	A	A	B	B	B	B	A	B	B	A	A	A	B	B	B
GM03:28124328	A	B	B	B	B	A	B	B	B	A	B	A	B	A	B	B	B	A	B	B	A	A	A	B	A	A	A	B	A	A	B	B	A	B	A	A	B	B	B	B	A	B	B	A	A	A	B	B	B
GM03:28844494	A	B	B	B	B	A	B	B	B	A	B	A	B	A	B	B	B	A	B	B	A	A	A	B	A	A	A	B	A	A	B	B	A	B	A	A	B	B	B	B	A	B	B	A	A	A	B	B	B
GM03:28844588	A	B	B	B	B	A	B	B	B	A	B	A	B	A	B	B	B	A	B	B	A	A	A	B	A	A	A	B	A	A	B	B	A	B	A	A	B	B	B	B	A	B	B	A	A	A	B	B	B
GM03:28851441	A	B	B	B	B	A	B	B	B	A	B	A	B	A	B	B	B	A	B	B	A	A	A	B	A	A	A	B	A	A	B	B	A	B	A	A	B	B	B	B	A	B	B	A	A	A	B	B	B
GM03:28851750	A	B	B	B	B	A	B	B	B	A	B	A	B	A	B	B	B	A	B	B	A	A	A	B	A	A	A	B	A	A	B	B	A	B	A	A	B	B	B	B	A	B	B	A	A	A	B	B	B
GM03:28893771	A	B	B	B	B	A	B	B	B	A	B	A	B	A	B	B	B	A	B	B	A	A	A	B	A	A	A	B	A	A	B	B	A	B	A	A	B	B	B	B	A	B	B	A	A	A	B	B	B
GM03:28893837	A	B	B	B	B	A	B	B	B	A	B	A	B	A	B	B	B	A	B	B	A	A	A	B	A	A	A	B	A	A	B	B	A	B	A	A	B	B	B	B	A	B	B	A	A	A	B	B	B
GM03:29031911	A	B	B	B	B	A	B	B	B	A	B	A	X	A	B	B	B	A	B	B	A	A	A	B	A	A	A	B	A	A	B	B	A	A	A	A	B	B	B	B	A	B	B	A	A	A	B	B	X
GM03:29131350	A	B	B	B	B	A	B	B	B	A	B	A	X	A	B	B	B	A	B	B	A	A	A	B	A	A	A	B	A	A	B	B	A	A	A	A	B	B	B	B	A	B	B	A	A	A	B	B	X
GM03:29171627	A	B	B	B	B	A	B	B	B	A	B	A	X	A	B	B	B	A	B	B	A	A	A	B	A	A	A	B	A	A	B	B	A	A	A	A	B	B	B	B	A	B	B	A	A	A	B	B	X
GM03:29226503	A	B	B	B	B	A	B	B	B	A	B	A	B	A	B	B	B	A	B	B	A	A	A	B	A	A	A	B	A	A	B	B	A	A	A	A	B	B	B	B	A	B	X	A	A	A	B	B	X
GM03:29372694	A	B	B	B	B	A	B	B	B	A	B	A	X	A	B	B	B	A	B	B	A	A	A	B	A	A	A	B	A	A	B	B	A	B	A	A	B	B	B	B	A	B	X	A	A	A	X	B	B
GM03:29425140	A	B	B	B	A	A	B	B	A	A	B	A	X	A	B	B	B	A	B	A	A	A	A	B	A	A	A	B	A	A	B	A	A	B	A	A	B	B	B	B	A	B	B	A	A	A	A	B	B
GM03:29471704	A	B	B	B	B	A	B	B	B	A	B	A	A	A	B	B	B	A	B	B	A	A	A	B	A	A	A	B	A	A	B	B	A	A	A	A	B	B	B	B	A	B	B	A	A	A	B	B	X
GM03:29571530	A	B	B	B	B	A	B	B	B	A	B	A	X	A	B	B	B	A	B	B	A	A	A	B	A	A	A	B	A	A	B	B	A	A	A	A	B	B	B	B	A	B	B	A	A	A	B	B	X
GM03:31073138	A	B	B	B	B	A	B	B	B	A	B	A	X	A	B	B	B	A	B	B	A	A	A	B	A	A	A	B	A	A	B	B	A	A	A	A	B	B	B	B	A	B	B	A	A	A	B	B	A
GM03:31154872	A	B	B	B	B	A	B	B	B	A	B	A	X	A	B	B	B	A	B	B	A	A	A	B	A	A	A	B	A	A	B	B	A	A	A	A	B	B	B	B	A	X	X	A	A	A	B	B	A
GM03:31982734	A	B	B	B	B	A	B	B	B	A	B	A	A	A	B	B	B	A	B	B	A	A	A	B	A	A	A	B	A	A	B	B	A	A	A	A	B	B	B	B	A	B	A	A	A	A	B	B	A
GM03:32039876	A	B	B	B	B	A	B	B	B	A	B	A	B	A	B	B	B	A	B	B	A	A	A	B	A	A	A	B	A	A	B	B	A	A	A	A	B	B	B	B	A	B	B	A	X	A	B	B	A
GM03:33421548	A	B	B	B	B	A	B	B	B	A	B	A	B	A	B	B	B	B	B	B	A	A	B	B	A	A	A	B	A	A	B	B	A	A	A	A	B	B	X	B	A	B	B	A	A	A	A	B	B
GM03:33692878	A	B	B	B	B	A	B	B	B	A	B	A	X	A	B	B	B	B	B	B	A	A	A	B	A	A	A	B	A	A	B	B	A	A	A	A	B	B	A	B	A	B	B	A	A	A	A	B	B
GM03:34158851	B	B	B	B	B	A	B	B	B	A	B	A	X	A	B	B	B	B	B	B	A	A	B	B	A	A	A	B	A	A	B	B	A	A	A	A	B	B	A	B	A	B	B	A	A	A	A	B	B
GM03:34204641	B	B	B	B	B	A	B	B	B	A	B	A	X	A	B	B	B	B	B	B	A	A	A	B	A	A	A	B	A	A	B	B	A	A	A	A	B	B	A	B	A	B	B	A	A	A	A	B	B
GM03:34204909	B	B	B	B	B	A	B	B	B	A	B	A	X	A	B	B	B	B	B	B	A	A	B	B	A	A	A	B	A	A	B	X	B	A	A	A	B	B	A	B	A	A	B	A	A	A	A	B	B
GM03:34241236	B	B	B	B	B	A	B	B	B	A	B	A	A	A	B	B	B	B	B	B	A	A	B	B	A	A	A	A	A	A	B	X	A	A	A	A	B	B	A	B	A	B	B	A	A	A	A	B	B
GM03:34250276	B	B	B	B	B	A	B	B	B	A	B	A	X	A	B	B	B	B	B	B	A	A	B	B	A	A	A	B	A	A	B	A	B	A	A	A	B	B	A	B	A	B	B	A	A	A	A	B	B
GM03:36699344	A	B	A	A	B	B	X	B	B	B	B	B	A	B	A	A	A	B	B	A	B	B	A	A	B	B	B	A	B	B	B	B	A	B	B	B	B	B	X	A	B	B	A	B	B	A	B	B	A
GM03:36949259	A	B	A	A	B	B	X	B	B	B	B	B	A	B	A	A	B	B	B	B	B	B	A	A	B	B	B	A	B	B	A	B	A	B	B	B	B	X	B	A	B	B	A	B	B	A	B	B	A
GM03:38125759	A	B	A	X	A	B	A	B	B	B	B	B	A	B	A	A	A	B	B	B	B	B	A	A	B	B	B	X	A	B	A	B	A	B	B	B	B	A	A	A	B	B	A	B	B	A	B	B	A
GM03:38157995	A	B	A	X	A	B	A	B	B	B	X	B	A	B	A	A	X	B	B	B	B	B	A	A	B	B	B	B	A	B	X	B	A	B	B	B	B	A	A	A	A	B	A	B	B	A	B	A	A
GM03:38354572	A	B	X	X	A	B	B	B	B	B	A	B	A	B	A	A	X	B	B	B	B	B	A	A	B	B	B	B	B	B	A	B	A	B	B	B	B	A	A	A	A	B	A	B	B	A	B	A	A
GM03:38448394	A	B	B	B	A	B	B	X	B	B	X	B	A	B	A	A	A	B	B	B	B	B	A	A	B	B	B	B	B	B	X	B	A	B	B	A	B	A	A	A	A	B	A	B	B	A	B	A	A
GM03:38585840	A	B	A	X	A	B	B	B	B	B	A	B	A	B	A	A	A	B	B	B	B	B	A	A	B	B	B	B	B	B	A	B	A	B	B	B	B	A	A	A	A	B	A	B	B	A	B	A	A
GM03:38624099	A	B	X	X	A	B	B	B	B	B	A	B	A	B	A	A	B	B	B	B	B	B	A	A	B	B	B	B	B	B	B	B	A	B	B	B	B	A	A	A	A	B	A	B	B	A	B	A	A
GM03:38661874	A	B	A	A	A	B	B	B	B	B	A	B	A	B	A	A	A	B	B	B	B	B	A	A	B	B	B	B	B	B	A	B	A	B	B	B	B	A	A	A	A	B	A	B	X	A	B	A	A
GM03:38939535	A	X	A	B	A	B	B	X	B	B	B	B	A	B	A	A	B	B	B	B	B	B	A	A	B	B	B	B	B	B	A	B	A	B	B	B	B	A	A	A	A	B	A	B	B	A	B	A	A
GM03:39016676	A	B	A	A	A	B	B	B	B	B	B	B	X	B	A	A	B	B	B	B	B	B	A	A	B	B	B	B	B	B	A	B	A	B	B	B	B	A	A	A	A	B	A	B	B	A	B	A	A
GM03:39017385	A	B	X	B	A	B	B	X	B	B	B	B	A	B	A	A	A	B	B	B	B	B	A	A	B	B	B	B	B	B	A	B	A	B	B	B	B	A	A	A	A	B	A	B	B	A	B	A	A
GM03:39075706	A	B	B	A	A	B	B	X	B	B	B	B	A	B	A	A	A	B	B	B	B	B	A	A	B	B	B	B	B	B	B	B	A	B	B	B	B	A	A	A	A	B	A	B	B	A	B	A	A
GM03:39370615	A	B	X	B	A	B	B	B	B	B	B	B	A	A	A	A	B	B	B	B	B	B	A	A	B	B	B	B	B	B	B	B	A	B	B	B	B	A	A	A	A	B	A	B	B	A	B	A	A
GM03:39427346	A	B	B	A	A	B	B	B	B	B	B	B	A	A	A	A	A	B	B	B	B	B	A	A	B	B	B	B	B	B	X	B	A	B	B	B	B	A	A	A	A	B	A	B	B	A	B	A	A
GM03:39427642	A	B	X	B	A	B	B	X	B	B	B	B	A	A	A	A	A	B	B	B	B	B	A	A	B	B	B	B	B	B	X	B	A	B	B	B	B	A	A	A	A	B	A	B	B	A	B	A	A
GM03:45209645	A	B	A	A	A	A	A	B	A	A	B	B	A	B	A	A	A	A	A	A	A	A	A	B	A	A	A	A	A	A	B	A	A	B	A	A	A	B	B	B	B	A	A	X	A	A	A	A	A
GM03:45235010	A	B	A	A	A	A	A	B	A	A	B	B	A	B	A	A	A	A	A	A	A	A	A	B	A	A	A	A	A	A	B	A	A	B	A	A	A	B	B	B	B	A	A	X	A	A	A	A	A
GM03:45452938	A	B	A	A	A	A	A	B	A	A	B	B	A	B	A	A	A	A	A	A	A	A	A	B	A	A	A	A	A	A	B	A	A	B	A	A	A	B	B	B	B	A	A	B	A	A	A	A	A
GM03:45453167	A	B	A	A	A	A	A	B	A	A	B	B	A	B	A	A	A	A	A	A	A	A	A	B	A	A	A	A	A	A	B	A	A	B	A	A	A	B	B	B	B	A	A	X	A	A	A	A	A
GM03:45461826	A	B	A	A	A	A	A	B	A	A	B	B	A	B	A	A	A	A	A	A	A	A	A	B	A	A	A	A	A	A	B	A	A	B	A	A	A	B	B	B	B	A	A	X	A	A	A	A	A
GM03:45593611	A	B	A	A	A	A	A	B	A	A	B	B	A	B	A	A	A	A	A	A	A	A	A	B	A	A	A	A	A	A	B	A	A	B	A	A	A	B	B	B	B	A	A	B	A	A	A	A	A
GM04:1076916	A	A	B	B	B	X	A	A	A	A	B	A	A	B	B	A	B	A	A	A	B	B	B	A	A	A	B	B	B	B	B	B	B	B	B	A	A	A	B	A	B	B	B	B	B	B	B	A	A
GM04:1086192	A	A	B	B	B	X	A	A	A	A	B	A	A	B	B	A	B	A	A	A	B	B	B	A	A	A	B	B	B	B	B	B	B	B	B	A	A	A	B	A	B	B	B	B	B	B	B	A	A
GM04:1087364	A	A	B	B	B	X	A	A	A	A	B	A	A	B	B	A	B	X	A	B	B	B	B	A	A	A	B	B	B	B	B	B	B	B	B	A	A	A	B	A	B	B	B	B	B	B	B	A	A
GM04:1143778	A	A	B	B	B	X	A	A	A	A	B	A	A	B	B	A	B	X	A	A	B	B	B	A	A	A	B	B	B	B	B	B	B	B	B	A	A	A	B	A	B	B	B	B	B	B	B	A	A
GM04:1404047	A	A	B	B	B	B	A	A	A	A	B	A	A	B	B	A	B	B	A	A	B	B	B	A	A	A	B	B	B	B	B	B	B	B	B	A	A	A	B	X	B	B	B	B	X	B	A	A	A
GM04:1597381	A	A	B	B	B	B	A	A	A	A	B	A	A	B	B	A	B	X	A	A	B	B	B	A	A	B	B	B	B	B	B	B	B	B	B	A	A	A	B	X	B	B	B	B	X	B	A	A	A
GM04:2102753	A	X	B	B	B	B	A	A	A	A	B	A	A	B	B	A	B	A	A	A	B	B	B	A	B	A	B	B	B	B	B	B	B	B	B	A	A	A	B	B	B	B	B	B	B	B	A	X	A
GM04:2116765	X	X	B	B	B	X	A	A	A	A	B	A	A	B	B	A	A	A	A	A	B	B	B	A	B	A	B	B	B	B	B	B	B	B	B	A	A	A	B	B	B	B	B	B	B	B	A	X	A
GM04:2141410	A	X	B	B	B	X	A	A	A	A	B	A	A	B	B	A	A	A	A	A	B	B	B	A	B	A	B	B	B	B	B	B	B	B	B	A	A	A	B	B	B	B	B	B	B	B	A	X	X
GM04:2141776	A	A	B	B	B	X	A	A	A	A	B	A	A	B	B	A	B	X	A	A	B	B	B	A	B	A	B	B	B	B	B	B	B	B	B	A	A	A	B	B	B	B	B	B	B	B	A	X	A
GM04:2180386	A	X	B	B	B	A	A	A	A	A	B	A	A	B	B	A	B	B	A	A	B	B	B	A	B	A	B	B	B	B	B	B	B	B	B	A	A	A	B	B	B	B	B	B	B	B	X	B	A
GM04:2182947	A	X	B	B	B	X	A	A	A	A	B	A	A	B	B	A	B	B	A	A	B	B	B	A	B	A	B	B	B	B	B	B	B	B	B	A	A	A	B	B	B	B	B	B	B	B	X	B	A
GM04:2236262	A	A	B	B	B	A	A	A	A	A	B	A	X	B	B	A	B	X	A	A	B	B	B	A	B	A	B	B	B	B	B	B	B	B	B	A	A	A	B	B	B	B	B	B	B	B	A	B	A
GM04:2286457	A	B	B	B	B	A	A	A	A	A	B	A	A	B	B	B	B	X	A	A	B	B	B	A	B	A	B	B	B	B	B	B	B	B	B	A	A	A	B	B	B	B	B	B	B	B	A	B	A
GM04:2662738	A	X	B	B	B	A	A	A	A	A	B	A	A	B	B	B	B	X	A	B	B	B	B	A	B	A	B	B	B	B	B	A	B	B	B	A	A	A	B	B	B	A	B	B	B	B	X	B	A
GM04:2821816	A	A	B	B	A	X	A	A	A	A	B	A	A	B	B	B	B	A	A	B	B	B	B	A	B	A	B	B	B	B	B	A	B	B	B	X	A	A	B	B	B	A	B	B	B	B	A	B	A
GM04:2842004	A	A	B	B	A	X	A	A	A	A	B	A	A	B	B	B	B	X	A	B	B	B	B	A	B	A	B	B	B	B	B	A	B	B	B	X	A	A	B	B	B	A	B	B	B	B	X	B	A
GM04:2843309	A	X	B	B	B	X	A	A	A	A	B	A	A	B	B	B	B	A	A	B	B	B	B	A	B	A	B	B	B	B	B	A	B	B	B	X	A	A	B	B	B	A	B	B	B	B	A	B	A
GM04:2848793	A	A	B	B	A	X	A	A	A	A	B	A	A	B	B	B	B	X	A	B	B	B	B	A	B	A	B	B	B	B	B	A	B	B	B	B	A	A	B	B	B	A	B	B	B	B	A	B	A
GM04:2984104	A	X	B	B	B	A	A	A	A	A	B	A	A	B	B	B	B	A	A	B	B	B	B	A	B	A	B	B	B	B	B	A	B	B	B	B	X	A	B	B	B	A	B	B	X	B	X	A	A
GM04:3007258	A	B	B	B	X	X	A	A	A	A	B	A	A	B	B	B	B	X	A	B	B	B	B	A	B	A	B	X	B	B	B	A	B	B	B	X	X	A	B	B	B	A	B	B	X	B	A	B	A
GM04:3007469	A	A	B	B	B	X	A	A	A	A	B	A	A	B	B	B	B	X	A	B	B	B	B	A	B	A	B	B	B	B	B	A	B	B	B	A	X	A	B	B	B	A	B	B	X	B	A	B	A
GM04:3296222	A	B	B	B	A	X	A	B	A	A	A	A	A	B	B	B	B	B	A	B	B	B	B	A	B	A	B	B	B	B	B	A	B	B	B	A	B	B	B	B	B	A	B	B	X	B	A	A	A
GM04:3345327	A	A	B	B	X	X	A	B	B	A	A	A	A	B	B	B	B	B	A	B	B	B	B	A	B	A	B	B	B	B	B	A	B	B	B	A	B	B	B	B	B	A	B	B	X	B	A	A	A
GM04:3509078	A	B	B	B	A	A	A	B	A	A	A	A	A	B	B	B	B	A	A	B	B	B	B	A	B	A	B	B	B	B	B	A	B	B	B	A	B	B	B	B	B	A	B	B	X	B	X	A	A
GM04:3530645	A	B	B	B	A	X	A	X	B	A	A	A	A	B	B	B	B	B	A	B	B	B	B	A	B	A	B	B	B	B	B	A	B	B	B	A	B	B	B	B	B	A	B	B	X	B	B	A	A
GM04:3599479	A	B	B	B	A	X	A	A	X	A	A	A	A	B	B	B	B	X	A	B	B	B	B	A	B	A	B	X	B	B	B	A	B	B	B	A	B	B	B	B	B	A	B	B	X	B	X	A	A
GM04:3668965	A	B	B	B	A	X	A	B	B	A	A	A	A	B	B	B	B	B	A	B	B	B	B	A	B	A	B	B	B	B	B	A	B	B	B	A	B	B	B	B	B	A	B	B	X	B	X	A	A
GM04:3730903	A	B	B	B	A	X	A	A	B	A	A	A	A	B	X	B	B	A	A	B	B	B	B	A	B	A	B	X	B	B	B	A	B	B	B	A	B	B	B	B	B	A	B	B	X	B	X	A	A
GM04:3740952	A	B	B	B	B	X	A	X	A	A	A	A	A	B	X	B	B	B	A	B	B	B	B	A	B	A	B	B	B	B	B	A	B	B	B	X	B	B	B	B	B	A	B	B	X	B	X	A	A
GM04:4093911	A	B	B	A	A	A	A	A	B	A	A	A	A	B	X	B	B	A	A	B	B	B	B	A	B	A	B	X	B	B	B	A	B	B	B	B	B	B	B	B	B	A	B	B	A	B	A	A	A
GM04:4101799	A	B	B	B	B	A	A	A	B	A	A	A	A	B	B	B	B	A	A	B	B	B	B	A	B	A	B	A	B	B	B	A	B	B	B	X	B	B	B	B	B	A	B	B	A	B	A	A	A
GM04:4106168	A	B	B	X	X	A	A	A	B	A	A	A	A	B	X	B	B	A	A	B	B	B	B	A	B	A	B	B	B	B	B	A	B	B	B	X	B	B	B	B	B	A	B	B	A	B	A	A	A
GM04:4106438	A	B	B	X	A	A	A	A	B	A	A	A	A	B	B	B	B	A	A	B	B	B	B	A	B	A	B	X	B	B	B	A	B	B	B	X	B	B	B	B	B	A	B	B	A	B	A	A	A
GM04:4158205	A	B	B	B	B	A	A	A	B	A	A	A	A	B	B	B	B	A	A	B	B	B	B	A	B	A	B	A	B	B	B	A	B	B	B	X	B	B	B	B	B	A	B	B	A	B	A	A	A
GM04:4185355	A	B	B	X	A	A	A	A	B	A	A	A	A	B	A	B	B	A	A	B	B	B	B	A	B	A	B	B	B	B	B	A	B	B	B	B	B	B	B	B	B	A	B	B	A	B	A	A	A
GM04:4239479	A	B	B	X	B	A	A	A	B	A	A	A	A	B	A	B	B	A	A	B	B	B	B	A	B	A	B	B	B	B	B	A	B	B	B	X	B	B	B	B	B	A	B	B	A	B	A	A	A
GM04:4276729	A	B	B	A	B	A	A	A	B	A	A	A	A	B	B	B	B	A	A	B	B	B	B	A	B	A	B	X	B	B	B	A	B	B	B	B	B	B	B	B	B	A	B	B	A	B	A	A	A
GM04:4368858	A	B	B	A	B	A	A	A	B	A	A	A	A	B	A	B	B	A	A	B	B	B	B	A	B	A	B	A	B	B	B	A	B	B	B	X	B	B	B	B	B	A	B	B	A	B	A	A	A
GM04:4385785	A	B	B	A	B	A	A	A	B	A	A	A	A	B	X	B	B	A	A	B	B	B	B	A	B	A	B	A	B	B	B	A	B	B	B	X	B	B	B	B	B	A	B	B	A	B	A	A	A
GM04:4982888	A	B	A	B	A	A	A	B	B	X	A	A	A	B	B	B	B	A	A	B	B	A	B	A	B	A	B	X	B	B	B	A	B	B	B	B	B	B	B	B	B	A	B	B	X	B	A	A	A
GM04:5370329	A	B	X	B	A	A	A	B	B	X	A	A	X	B	A	A	B	X	A	B	B	A	B	A	B	A	B	X	B	B	B	A	B	B	A	B	B	B	B	B	B	A	B	B	A	B	A	A	A
GM04:5817731	A	B	A	A	A	A	A	B	B	X	A	A	X	B	A	A	B	B	A	B	B	A	B	A	B	A	B	A	B	B	B	A	B	B	A	X	B	B	B	B	B	A	B	B	A	A	A	A	A
GM04:5971680	A	B	A	B	A	A	A	B	B	X	A	A	A	B	X	A	B	B	A	B	B	A	B	A	B	A	B	A	B	B	B	A	B	B	A	B	B	B	B	B	B	A	B	B	A	A	A	A	A
GM04:6016181	A	B	X	B	A	A	A	B	B	X	A	A	B	B	B	A	B	B	A	B	B	A	B	A	B	A	B	A	B	B	X	A	B	B	A	A	B	B	B	B	B	A	B	B	A	A	A	A	A
GM04:6032187	A	B	B	B	A	A	A	B	B	X	A	A	B	B	B	A	B	B	A	B	B	A	B	A	B	A	B	A	B	B	X	A	B	B	A	A	B	B	B	B	B	A	B	B	A	A	A	A	A
GM04:6095730	A	B	B	B	A	A	A	B	B	B	A	A	B	B	X	A	B	B	A	B	B	A	B	A	B	A	B	A	B	B	A	A	B	B	A	B	B	B	B	B	B	A	B	B	A	A	A	A	A
GM04:6353086	A	B	A	B	A	A	A	B	B	B	A	A	B	B	B	A	B	B	A	B	B	A	B	A	B	A	B	A	B	B	X	A	B	B	A	B	B	B	B	B	B	A	B	B	A	A	A	A	A
GM04:6410273	A	B	X	A	A	A	A	B	B	A	A	A	B	B	A	A	B	B	A	B	B	A	B	A	B	A	B	A	B	B	A	A	B	B	A	X	B	B	B	B	B	A	B	B	A	A	A	A	A
GM04:6422828	A	B	X	A	A	A	A	B	B	X	A	A	B	B	A	A	B	B	A	B	B	A	B	A	B	A	B	A	B	B	X	A	B	B	A	X	B	B	B	B	B	A	B	B	X	A	A	A	A
GM04:7044095	X	B	A	B	A	A	A	B	A	X	A	A	X	B	B	A	B	B	A	B	B	A	B	A	B	X	B	A	B	B	A	A	A	B	A	B	B	B	B	B	B	A	B	B	A	A	A	A	B
GM04:8237808	B	B	B	A	B	X	A	B	B	B	A	A	B	B	A	A	A	B	A	B	A	A	A	A	B	B	B	A	B	A	B	A	A	B	A	X	B	B	A	B	B	A	B	B	A	B	B	B	B
GM04:8291114	B	B	B	B	B	X	A	B	B	B	A	A	A	B	B	A	A	B	A	B	A	A	A	X	B	B	B	A	B	A	B	A	B	B	A	X	B	B	A	B	B	A	B	B	A	B	B	B	B
GM04:8291469	B	B	B	X	B	X	A	B	B	B	A	A	X	B	X	A	A	B	A	B	A	A	A	A	B	B	B	A	B	A	B	A	A	B	A	A	B	B	A	B	B	A	B	B	A	B	B	B	B
GM04:8306967	B	B	B	A	B	A	A	B	B	B	A	A	A	B	X	A	A	B	A	B	A	A	A	X	B	B	B	A	B	A	B	A	X	B	A	A	B	B	A	B	B	A	B	B	A	B	B	B	B
GM04:8388773	B	B	B	A	B	A	A	B	B	B	A	A	A	B	B	A	A	B	A	B	A	A	A	B	B	B	B	A	B	A	B	A	A	B	A	A	B	B	A	B	B	A	B	B	A	B	B	B	B
GM04:8438398	B	B	B	A	B	A	A	B	B	B	A	A	A	B	X	A	A	B	A	B	A	A	A	X	B	B	B	A	B	A	B	A	B	B	A	A	B	B	A	B	B	A	B	B	A	B	B	B	B
GM04:8576205	B	B	B	X	B	X	A	B	B	B	A	A	X	B	B	A	A	B	A	B	A	A	A	B	B	B	B	A	B	A	B	A	A	B	A	A	B	B	A	B	B	A	B	B	A	B	X	B	B
GM04:8577751	B	B	B	A	B	A	A	B	B	B	A	A	A	B	X	A	A	B	A	B	A	A	A	X	B	B	B	A	B	A	B	A	A	B	A	A	B	B	A	B	B	A	B	B	A	B	X	B	B
GM04:8585545	B	B	B	X	B	A	A	B	B	B	A	A	X	B	A	A	A	B	A	B	A	A	A	B	B	B	B	A	B	A	B	A	A	B	A	B	B	B	A	B	B	A	B	B	A	B	X	B	B
GM04:8594477	B	B	B	B	B	A	A	B	B	B	A	A	A	B	A	A	A	B	A	B	A	A	A	B	B	B	B	A	B	A	B	A	X	B	A	B	B	B	A	B	B	A	B	B	A	B	B	B	B
GM04:8613639	B	B	B	B	B	X	A	B	B	B	A	A	X	B	B	A	A	B	A	B	A	A	B	B	B	B	B	A	B	A	B	A	X	B	A	A	B	B	A	B	B	A	B	B	A	B	X	B	B
GM04:8616234	B	B	B	A	B	A	A	B	B	B	A	A	A	B	A	A	A	B	A	B	A	A	A	X	B	B	B	A	B	A	B	A	A	B	A	A	B	B	A	B	B	A	B	B	A	B	A	B	B
GM04:8788063	B	B	B	A	B	A	A	B	B	B	A	A	X	B	X	A	A	B	A	B	A	A	A	B	B	B	B	A	B	A	B	A	X	B	A	X	B	B	A	B	B	A	B	B	A	B	X	B	B
GM04:8872633	B	B	B	A	B	A	A	B	B	B	A	A	X	B	B	A	A	B	A	B	A	A	A	B	B	B	B	A	B	A	B	A	B	B	A	X	B	B	A	B	B	A	B	B	A	B	B	B	B
GM04:9023796	B	B	B	A	B	A	A	B	B	B	A	A	B	B	A	A	A	B	A	B	A	A	A	B	B	B	B	A	B	A	B	A	X	B	A	X	B	B	A	B	B	A	B	B	A	B	B	B	B
GM04:9115728	B	B	B	A	A	X	A	A	B	B	A	A	B	B	X	A	A	B	A	B	A	A	A	B	B	B	B	A	B	A	B	A	X	B	A	X	X	A	A	B	B	A	B	B	A	B	A	B	B
GM04:9116485	B	B	B	A	B	A	A	B	B	B	A	A	B	B	B	A	A	B	A	B	A	A	A	B	B	B	B	A	B	A	B	A	B	B	A	X	B	B	B	B	B	A	B	B	A	B	B	B	B
GM04:9230671	B	B	B	X	X	X	A	A	B	B	A	A	B	B	A	A	A	B	A	B	A	A	A	B	B	B	B	A	B	A	B	A	X	B	A	X	A	A	A	B	B	A	B	B	A	B	X	B	B
GM04:9252298	B	B	B	X	B	B	A	A	B	B	A	A	B	B	B	A	A	B	A	B	A	A	A	B	B	B	B	A	B	A	B	A	B	B	A	X	X	A	A	B	B	X	B	B	A	B	B	B	B
GM04:9252388	A	B	B	X	B	B	A	A	B	B	A	A	B	B	B	A	A	B	A	B	A	A	A	B	B	B	B	A	B	A	B	A	B	B	A	X	A	A	A	B	B	X	B	B	A	B	B	B	B
GM04:9274096	A	B	B	A	X	B	A	A	B	B	A	A	B	B	X	A	A	B	A	B	A	A	A	B	B	B	B	A	B	A	B	A	X	B	A	X	A	A	A	B	B	A	B	B	A	B	A	B	B
GM04:9322751	A	B	B	X	X	A	A	A	B	B	A	A	B	B	A	A	A	B	A	B	A	A	A	B	B	B	B	A	B	A	B	A	A	B	A	A	A	A	A	B	B	X	B	B	A	B	B	B	B
GM04:9324701	A	B	B	X	X	A	A	A	B	B	A	A	B	B	A	A	A	B	A	B	A	A	A	B	B	B	B	A	B	A	B	A	X	B	A	A	A	A	A	B	B	B	B	B	A	B	B	B	B
GM04:9328668	A	B	B	A	A	A	A	A	B	B	A	A	B	B	A	A	A	B	A	B	A	A	A	B	B	B	B	A	B	A	B	A	A	B	A	A	A	A	A	B	B	A	B	B	A	B	X	B	B
GM04:9381488	B	A	A	B	B	A	B	B	A	A	B	B	A	A	B	B	B	A	B	A	B	B	B	A	A	A	A	B	A	B	A	B	B	A	B	B	B	B	B	A	A	B	A	A	B	A	X	A	A
GM04:9766946	B	A	A	B	B	A	B	B	A	A	B	B	B	A	X	B	B	A	B	A	B	B	B	A	A	A	A	A	A	B	A	A	A	A	B	B	B	B	B	A	A	X	A	A	B	A	B	A	A
GM04:10151518	A	B	B	A	A	X	A	A	B	B	A	A	A	B	X	A	A	B	A	B	A	A	A	B	B	B	B	B	B	A	B	X	A	B	A	A	A	A	A	B	B	B	B	B	A	B	B	B	B
GM04:10204807	B	A	A	B	B	A	B	B	A	A	B	B	B	A	A	B	B	A	B	A	B	B	B	X	A	A	A	A	A	B	A	X	X	A	B	B	B	B	B	A	A	A	A	A	B	A	A	A	A
GM04:10743299	B	A	A	B	B	B	B	B	A	A	B	B	B	A	A	B	B	A	B	A	A	B	B	A	A	A	A	A	A	B	A	X	A	A	B	B	B	B	B	A	A	B	A	A	B	A	A	A	A
GM04:10745549	A	B	B	A	A	X	A	A	B	B	A	A	A	B	X	A	A	B	A	B	A	A	A	B	B	B	B	B	B	A	B	B	B	B	A	A	A	A	A	B	B	B	B	B	A	B	B	B	B
GM04:10812813	B	A	A	B	B	B	B	B	A	A	B	B	B	A	X	B	B	A	B	A	B	B	B	X	A	A	A	A	A	B	A	X	B	A	B	B	B	B	B	A	A	X	A	A	B	A	B	A	A
GM04:10985437	A	B	B	A	A	B	A	A	B	B	A	A	A	B	X	A	A	B	A	B	A	A	A	X	B	B	B	B	B	A	B	B	X	B	A	A	A	A	A	B	B	X	B	B	A	B	A	B	B
GM04:15287473	A	B	B	A	A	A	A	A	B	B	A	A	A	B	B	A	A	B	A	B	A	A	A	X	B	B	B	B	B	A	B	B	A	B	A	A	A	A	A	B	B	A	B	B	A	B	X	B	B
GM04:15438084	A	B	B	A	A	A	A	A	B	B	A	A	A	B	B	A	A	B	A	B	A	A	A	A	B	B	B	B	B	A	B	A	X	B	A	A	A	A	A	B	B	X	B	B	A	B	B	B	B
GM04:15748916	A	B	B	A	A	X	A	A	B	B	A	A	A	B	B	A	A	B	A	A	A	A	A	A	B	B	B	B	B	A	B	A	B	B	A	A	A	A	A	B	B	B	B	B	A	B	B	B	B
GM04:15773500	A	B	B	A	A	A	A	A	B	B	A	A	A	B	B	A	A	B	A	B	A	A	A	A	B	B	B	B	B	A	B	X	A	B	A	A	A	A	A	B	B	X	B	B	A	B	B	B	B
GM04:15855447	A	B	B	A	A	X	A	A	B	B	A	A	A	B	B	A	A	B	A	B	A	A	A	A	B	B	B	B	B	A	B	X	A	B	A	A	A	A	A	B	B	X	B	B	A	B	B	B	B
GM04:15937866	A	B	B	A	A	A	A	A	B	B	A	A	A	B	B	A	A	B	A	B	A	A	A	A	B	B	B	B	B	A	B	A	X	B	A	A	A	A	A	B	B	X	B	B	A	B	B	B	B
GM04:16171373	A	B	B	A	A	X	A	A	B	B	A	A	A	B	B	A	A	B	A	B	A	A	A	B	B	B	B	B	B	A	B	A	B	B	A	A	A	A	A	B	B	B	B	B	A	B	B	B	B
GM04:16197526	A	B	B	A	A	A	A	A	B	B	A	A	A	B	B	A	A	B	A	B	A	A	A	B	B	B	B	B	B	A	B	X	B	B	A	A	A	A	A	B	B	X	B	B	A	B	A	B	B
GM04:16246703	A	B	B	A	A	B	A	A	B	B	A	A	A	B	B	A	A	B	A	B	A	A	A	X	B	B	B	B	B	A	B	X	B	B	A	B	A	A	A	B	B	X	B	B	A	B	B	B	B
GM04:16246972	A	B	B	B	A	A	A	A	B	B	A	A	A	B	B	A	A	B	A	B	A	A	A	X	B	B	B	B	B	A	B	A	A	B	A	A	A	A	A	B	B	X	B	B	A	B	A	B	B
GM04:16428287	A	B	B	A	A	X	A	A	B	B	A	A	A	B	B	A	A	B	A	B	A	X	A	B	B	B	B	B	B	A	B	B	A	B	A	A	A	A	A	B	B	X	B	B	A	B	X	B	B
GM04:16428330	A	B	B	A	A	A	A	A	B	B	A	A	A	B	B	A	A	B	A	B	A	X	A	X	B	B	B	B	B	A	B	B	A	B	A	A	A	A	A	B	B	X	B	B	A	B	X	B	B
GM04:16428359	A	B	B	A	A	A	A	A	B	B	A	A	A	B	B	A	A	B	A	B	A	A	A	X	B	B	B	B	B	A	B	B	A	B	A	A	A	A	A	B	B	X	B	B	A	B	X	B	B
GM04:16521235	A	B	B	A	A	X	A	A	B	B	A	A	A	B	B	A	A	B	A	B	A	A	A	B	B	B	B	B	B	A	B	B	X	B	A	A	A	A	A	B	B	X	B	B	A	B	X	B	B
GM04:16688045	A	B	B	A	A	X	A	A	B	B	A	A	A	B	B	A	A	B	A	B	A	A	A	B	B	B	B	B	B	A	B	X	B	B	A	A	A	A	A	B	B	B	B	B	A	B	B	B	B
GM04:16804482	A	B	B	A	A	A	A	A	B	B	A	A	A	B	B	A	A	B	A	B	A	A	A	X	B	B	B	B	B	A	B	B	X	B	A	A	A	A	A	B	B	A	B	B	A	B	X	B	B
GM04:16838003	A	B	B	A	A	A	A	A	B	B	A	A	A	B	B	A	A	B	A	B	A	A	A	X	B	B	B	B	B	A	B	A	B	B	A	A	A	A	A	B	B	A	B	B	A	B	X	B	B
GM04:16851850	A	B	B	A	A	A	A	A	B	B	A	A	A	B	B	A	A	B	A	B	A	A	A	A	B	B	B	B	B	A	B	B	A	B	A	A	A	A	A	B	B	A	B	B	A	B	A	B	B
GM04:16853028	A	B	B	A	A	A	A	A	B	B	A	A	A	B	B	A	A	B	A	B	A	A	A	A	B	B	B	B	X	A	B	B	X	B	A	A	A	A	A	B	B	A	B	B	A	B	A	B	B
GM04:16974748	A	B	B	A	A	A	A	A	B	X	A	A	A	B	B	A	A	B	A	B	A	X	A	B	B	B	B	B	B	A	B	B	X	B	A	A	A	A	A	B	B	B	B	B	A	B	B	B	B
GM04:16974874	A	B	B	A	A	A	A	A	B	B	A	A	A	B	B	A	A	B	A	B	A	X	A	B	B	B	B	B	B	A	B	X	X	B	A	A	A	A	A	B	B	B	B	B	A	B	B	B	B
GM04:17152230	A	B	B	A	A	A	A	A	B	B	A	A	A	B	B	A	A	B	A	B	A	A	A	X	B	B	B	B	B	A	B	B	B	B	A	A	A	A	A	B	B	X	B	B	A	B	B	B	B
GM04:17227512	A	B	B	A	A	A	A	A	B	B	A	A	A	B	B	A	A	B	A	B	A	A	A	X	B	B	B	B	B	A	B	X	B	B	A	A	A	A	A	B	B	A	B	B	A	B	A	B	B
GM04:17230775	A	B	B	A	A	A	A	A	B	B	A	A	A	B	B	A	A	B	A	B	A	A	A	A	B	B	B	B	B	A	B	A	A	B	A	A	A	A	A	B	B	A	B	B	A	B	A	B	B
GM04:17231687	A	B	B	A	A	B	A	A	B	B	A	A	A	B	B	A	A	B	A	B	A	A	A	A	B	B	B	B	B	A	B	A	A	B	A	A	A	A	A	B	B	A	B	B	A	B	A	B	B
GM04:17336426	A	B	B	A	A	A	A	A	B	B	A	A	A	B	B	A	A	B	A	B	A	A	A	X	B	B	B	B	B	A	B	A	B	B	A	A	A	A	A	B	B	A	B	B	A	B	X	B	B
GM04:17534130	A	B	B	A	A	X	A	A	B	B	A	A	A	B	B	A	A	B	A	B	A	A	A	B	B	B	B	B	B	A	B	A	X	B	A	A	A	A	A	B	B	A	B	B	A	B	X	B	B
GM04:17914073	A	B	B	A	A	B	A	A	B	B	A	A	A	B	B	A	A	B	A	B	A	X	A	B	B	B	B	B	B	A	B	B	A	B	A	A	A	A	A	B	B	A	B	B	A	B	A	B	B
GM04:17929174	A	B	B	A	A	X	A	A	B	B	A	A	A	B	B	A	A	B	A	B	A	A	A	B	B	B	B	B	B	A	B	X	A	B	A	A	A	A	A	B	B	A	B	B	A	B	A	B	B
GM04:18095241	A	B	B	A	A	A	A	A	B	B	A	A	A	B	B	A	A	B	A	B	A	A	A	B	B	B	B	B	B	A	B	A	B	B	A	A	A	A	A	B	B	B	B	B	A	B	B	B	B
GM04:18293895	A	B	B	A	A	A	A	A	B	B	A	A	A	B	B	A	A	B	A	B	A	A	A	B	B	B	B	B	B	A	B	A	X	B	A	A	A	A	A	B	B	A	B	B	A	B	A	B	B
GM04:18306117	A	B	B	A	A	X	A	A	B	B	A	A	A	B	B	A	A	B	A	B	A	A	A	B	B	B	B	B	B	A	B	A	X	B	A	A	A	A	A	B	B	B	B	B	A	B	X	B	B
GM04:18312993	A	B	B	A	A	A	A	A	B	B	A	A	A	B	B	A	A	B	A	B	A	A	A	A	B	B	B	B	B	A	B	A	X	B	A	A	A	A	A	B	B	X	B	B	A	B	X	B	B
GM04:18375447	A	B	B	A	A	A	A	A	B	B	A	A	A	B	B	A	A	B	A	B	A	A	A	X	B	B	B	B	B	A	B	A	A	B	A	A	A	A	A	B	B	A	B	B	A	B	A	B	B
GM04:18383138	A	B	B	A	A	X	A	A	B	B	A	A	A	B	B	A	A	B	A	B	A	A	A	B	B	B	B	B	B	A	B	B	X	B	A	A	A	A	A	B	B	B	B	B	A	B	X	B	B
GM04:20251662	A	B	B	A	A	B	A	A	B	B	A	A	A	B	B	A	A	B	A	B	A	A	A	B	B	B	B	B	B	A	B	B	B	B	A	A	A	A	A	B	B	B	B	B	A	B	B	B	B
GM04:21151813	A	B	B	A	A	X	A	A	B	B	A	A	A	B	B	A	A	B	A	B	A	A	A	B	B	B	B	B	B	A	B	B	X	B	A	A	A	A	A	B	B	B	B	B	A	B	X	B	B
GM04:21370668	A	B	B	A	A	X	A	A	B	B	A	A	A	B	B	A	A	B	A	B	A	A	A	B	B	B	B	B	B	A	B	X	X	B	A	A	A	A	A	B	B	B	B	B	A	B	B	X	B
GM04:21475491	A	B	B	A	A	X	A	A	B	B	A	A	A	B	B	A	A	B	A	B	A	A	A	A	B	B	B	B	B	A	B	A	A	B	A	A	A	A	A	B	B	X	B	B	A	B	B	B	B
GM04:21508054	A	B	B	A	A	A	A	A	B	B	A	A	A	B	B	A	A	B	A	B	A	A	A	A	B	B	B	B	B	A	B	B	A	B	A	A	A	A	A	B	B	X	B	B	A	B	B	B	B
GM04:21749680	A	B	B	A	A	A	A	A	B	B	A	A	A	B	B	A	A	B	A	B	A	A	A	A	B	B	B	B	B	A	B	B	A	B	A	A	A	A	A	B	B	A	B	B	A	B	B	B	B
GM04:22010259	A	B	B	A	A	B	A	A	B	B	A	A	A	B	B	A	A	B	A	B	A	A	A	X	B	B	B	B	B	A	B	X	A	B	A	A	A	A	A	B	B	X	B	B	A	B	B	B	B
GM04:22106402	A	B	B	A	A	A	A	A	B	B	A	A	A	B	B	A	A	B	A	B	A	A	A	X	B	B	B	B	B	A	B	B	A	B	A	A	A	A	A	B	B	A	B	B	A	B	B	B	B
GM04:22295750	A	B	B	A	A	A	A	A	B	B	A	A	A	B	B	A	A	B	A	B	A	A	A	A	B	B	B	B	B	A	B	X	X	B	A	X	A	A	A	B	B	B	B	B	A	B	B	B	B
GM04:22383304	A	B	B	A	A	B	A	A	B	B	A	A	A	B	B	A	A	B	A	B	A	A	A	A	B	B	B	B	B	A	B	A	A	B	A	A	A	A	A	B	B	A	B	B	A	B	X	B	B
GM04:22452635	A	B	B	A	A	X	A	A	B	B	A	A	A	B	B	A	A	B	A	B	A	A	A	A	B	B	B	B	B	A	B	A	A	B	A	A	A	A	A	B	B	A	B	B	A	B	X	B	B
GM04:22452678	A	B	B	A	A	X	A	A	B	B	A	A	A	B	B	A	A	B	A	B	A	A	A	X	B	B	B	B	B	A	B	X	X	B	A	X	A	A	A	B	B	A	B	B	A	B	B	B	B
GM04:22705951	A	B	B	A	A	B	A	A	B	B	A	A	A	B	B	A	A	B	A	B	A	A	A	A	B	B	B	B	B	A	B	A	A	B	A	A	A	A	A	B	B	B	B	B	A	B	X	B	B
GM04:22709551	A	B	B	A	A	A	A	A	B	B	A	A	A	B	B	A	A	B	A	B	A	A	A	A	B	B	B	B	B	A	B	A	A	B	A	A	A	A	A	B	B	B	B	B	A	B	A	B	B
GM04:22759169	A	B	B	A	A	A	A	A	B	B	A	A	A	B	B	A	A	B	A	B	A	A	A	A	B	B	B	B	B	A	B	A	A	B	A	A	A	A	A	B	B	B	B	B	A	B	A	B	B
GM04:22908935	A	B	B	A	A	X	A	A	B	B	A	A	A	B	B	A	A	B	A	B	A	A	A	A	B	B	B	B	B	A	B	A	A	B	A	A	A	A	A	B	B	B	B	B	A	B	A	B	B
GM04:22950426	A	B	B	A	A	A	A	A	B	B	A	A	A	B	B	A	A	B	A	B	A	A	A	B	B	B	B	B	B	A	B	B	X	B	A	A	A	A	A	B	B	A	B	B	A	B	X	B	B
GM04:23149465	A	B	B	A	A	X	A	A	B	B	A	A	A	B	B	A	A	B	A	B	A	A	A	B	B	B	B	B	B	A	B	B	B	B	A	A	A	A	A	B	B	B	B	B	A	B	X	B	B
GM04:23180834	A	B	B	A	A	X	A	A	B	B	A	A	A	B	B	A	A	B	A	B	A	A	A	A	B	B	B	B	B	A	B	A	A	B	A	A	A	A	A	B	B	A	B	B	A	B	A	B	B
GM04:23428532	A	B	B	A	A	B	A	A	B	B	A	A	A	B	B	A	A	B	A	B	A	A	A	B	B	B	B	B	B	A	B	X	B	B	A	A	A	A	A	B	B	B	B	B	A	B	A	B	B
GM04:23570549	A	B	B	A	A	B	A	A	B	B	A	A	A	B	B	A	A	B	A	B	A	A	A	B	B	B	B	B	B	A	B	X	B	B	A	A	A	A	A	B	B	B	B	B	A	B	B	B	B
GM04:23642207	A	B	B	A	A	A	A	A	B	B	A	A	A	B	B	A	A	B	A	B	A	A	A	A	B	B	B	B	B	A	B	A	B	B	A	A	A	A	A	B	B	A	B	B	A	B	A	B	B
GM04:23754495	A	B	B	A	A	A	A	A	B	B	A	A	A	B	B	A	A	B	A	B	X	A	A	A	B	B	B	B	B	A	B	A	B	B	A	A	A	A	A	B	B	B	B	B	A	B	X	B	B
GM04:23766338	A	B	B	A	A	B	A	A	B	B	A	A	A	B	B	A	A	B	A	B	A	A	A	A	B	B	B	B	B	A	B	A	X	B	A	A	A	A	A	B	B	B	B	B	A	B	B	B	B
GM04:23838971	A	B	B	A	A	A	A	A	B	B	A	A	A	B	B	A	A	B	A	B	A	A	A	A	B	B	B	B	B	A	B	A	A	B	A	A	A	A	A	B	B	X	B	B	A	B	X	B	B
GM04:23913784	A	B	B	A	A	A	A	A	B	B	A	A	A	B	B	A	A	B	A	B	A	A	A	A	B	B	B	B	B	A	B	A	A	B	A	A	A	A	A	B	B	B	B	B	A	B	A	B	B
GM04:23936435	A	B	B	A	A	B	A	A	B	B	A	A	A	B	B	A	A	B	A	B	A	A	A	A	B	B	B	B	B	A	B	A	B	B	A	A	A	A	A	B	B	X	B	B	A	B	A	B	B
GM04:23971847	A	B	B	A	A	X	A	A	B	B	A	A	A	B	B	A	A	B	A	B	A	A	A	A	B	B	B	B	B	A	B	A	B	B	A	A	A	A	A	B	B	X	B	B	A	B	A	B	B
GM04:24068434	A	B	B	A	A	X	A	A	B	B	A	A	A	B	B	A	A	B	A	B	A	A	A	A	B	B	B	B	B	A	B	A	B	B	A	A	A	A	A	B	B	X	B	B	A	B	A	B	B
GM04:24217772	A	B	B	A	A	X	A	A	B	B	A	A	A	B	B	A	A	B	A	B	A	A	A	A	B	B	B	B	B	A	B	A	X	B	A	A	A	A	A	B	B	X	B	B	A	B	A	B	B
GM04:24253427	A	B	B	A	A	A	A	A	B	B	A	A	A	B	B	A	A	B	A	B	A	A	A	A	B	B	B	B	B	A	B	A	X	B	A	A	A	A	A	B	B	A	B	B	A	B	A	B	B
GM04:24283956	A	B	B	A	A	X	A	A	B	B	A	A	A	B	B	A	A	B	A	B	A	A	A	A	B	B	B	B	B	A	B	X	A	B	A	A	A	A	A	B	B	A	B	B	A	B	A	B	B
GM04:24296272	A	B	B	A	A	A	A	A	B	B	A	A	A	B	B	A	A	B	A	B	A	A	A	A	B	B	B	B	B	A	B	A	A	B	A	A	A	A	A	B	B	X	B	B	A	B	A	B	B
GM04:24630370	A	B	B	A	A	X	A	A	B	B	A	A	A	B	B	A	A	B	A	B	A	A	A	X	B	B	B	B	B	A	B	B	B	B	A	A	A	A	A	B	B	X	B	B	A	B	A	B	B
GM04:24742562	A	B	B	A	A	B	A	A	B	B	A	A	A	B	B	A	A	B	A	B	A	A	A	X	B	B	B	B	B	A	B	B	B	B	A	A	A	A	A	B	B	X	B	B	A	B	B	B	B
GM04:24743622	A	B	B	A	A	X	A	A	B	B	A	A	A	B	B	A	A	B	A	B	A	A	A	A	B	B	B	B	B	A	B	X	B	B	A	A	A	A	A	B	B	A	B	B	A	B	B	B	B
GM04:24744949	A	B	B	A	A	A	A	A	B	B	A	A	A	B	B	A	A	B	A	B	A	A	A	X	B	B	B	B	B	A	B	A	B	B	A	A	A	A	A	B	B	X	B	B	A	B	A	B	B
GM04:24902684	A	B	B	A	A	A	A	A	B	B	A	A	A	B	B	A	A	B	A	B	A	A	A	X	B	B	B	B	B	A	B	A	A	B	A	A	A	A	A	B	B	X	B	B	A	B	A	B	B
GM04:25113031	A	B	B	A	A	A	A	A	B	B	A	A	A	B	B	A	A	B	A	B	A	A	A	B	B	B	B	B	B	A	B	A	A	B	A	A	A	A	A	B	B	B	B	B	A	B	B	B	B
GM04:25340993	A	B	B	A	A	A	A	A	B	B	A	A	A	B	B	A	A	B	A	B	A	A	A	B	B	B	B	B	B	A	B	A	B	B	A	A	A	A	A	B	B	B	B	B	A	B	A	B	B
GM04:25416462	A	B	B	A	A	B	A	A	B	B	A	A	A	B	B	A	A	B	A	B	A	A	A	B	B	B	B	B	B	A	B	X	B	B	A	A	A	A	A	B	B	B	B	B	A	B	B	B	B
GM04:25714094	A	B	B	A	A	A	A	A	B	B	A	A	A	B	B	A	A	B	A	B	A	A	A	B	B	B	B	B	B	A	B	X	B	B	A	A	A	A	A	B	B	B	B	B	A	B	A	B	B
GM04:25757990	A	B	B	A	A	A	A	A	B	B	A	A	A	B	B	A	A	B	A	B	A	A	A	B	B	B	B	B	B	A	B	X	B	B	A	A	A	A	A	B	B	B	B	B	A	B	A	B	B
GM04:25776701	A	B	B	A	A	A	A	A	B	B	A	A	A	B	B	A	A	B	A	B	A	A	A	X	B	B	B	B	X	A	B	A	A	B	A	A	A	A	A	B	B	X	B	B	A	B	A	B	B
GM04:25776887	A	B	B	A	A	X	A	A	B	B	A	A	A	B	B	A	A	B	A	B	A	A	A	B	B	B	B	B	B	A	B	A	A	B	A	A	A	A	A	B	B	B	B	B	X	B	B	B	B
GM04:25777007	A	B	B	A	A	X	A	A	B	B	A	A	A	B	B	A	A	B	A	B	A	A	A	X	B	B	B	B	B	A	B	A	A	B	A	A	A	A	A	B	B	X	B	B	A	B	B	B	B
GM04:26215519	A	B	B	A	A	B	A	A	B	B	A	A	A	B	B	A	A	B	A	B	A	A	A	B	B	B	B	B	B	A	B	A	B	B	A	A	A	A	A	B	B	B	B	B	A	B	B	B	B
GM04:26441718	A	B	B	A	A	X	A	A	B	B	A	A	A	B	B	A	A	B	A	B	A	A	A	B	B	B	B	B	B	A	B	B	A	B	A	A	A	A	A	B	B	B	B	B	A	B	B	B	B
GM04:27104066	A	B	B	A	A	A	A	A	B	B	A	A	A	B	B	A	A	B	A	B	A	A	A	X	B	B	B	B	B	A	B	B	A	B	A	A	A	A	A	B	B	X	B	B	A	B	A	B	B
GM04:29097044	A	B	B	A	A	X	A	A	B	B	A	A	A	B	B	A	A	B	A	B	A	A	A	B	B	B	B	B	B	A	B	X	X	B	A	A	A	A	A	B	B	B	B	B	A	B	B	B	B
GM04:29444216	A	B	B	A	A	X	A	A	B	B	A	A	A	B	B	A	A	B	A	B	A	A	A	B	B	B	B	B	B	X	B	B	X	B	A	A	A	A	A	B	B	B	B	B	A	B	B	B	B
GM04:30303179	A	B	B	A	A	A	A	A	B	B	A	A	A	B	B	A	A	B	A	B	A	A	A	X	B	B	B	B	B	A	B	X	X	B	A	A	A	A	A	B	B	X	B	B	X	B	X	B	B
GM04:30847700	A	B	B	A	A	A	A	A	B	B	A	A	A	B	B	A	A	B	A	B	A	A	A	B	B	B	B	B	B	A	B	B	A	B	A	A	A	A	A	B	B	A	B	B	A	B	A	B	B
GM04:31103096	A	B	B	A	A	X	A	A	B	B	A	A	A	B	B	A	A	B	A	B	A	A	A	B	B	B	B	B	B	A	B	B	B	B	A	A	A	A	A	B	B	B	B	B	A	B	X	B	B
GM04:31389583	A	B	B	A	A	A	A	A	B	B	A	A	A	B	B	A	A	B	A	B	A	A	A	A	B	B	B	B	B	A	B	A	X	B	A	A	A	A	A	B	B	A	B	B	A	B	B	B	B
GM04:31408946	A	B	B	A	A	B	A	A	B	B	A	A	A	B	B	A	A	B	A	B	A	A	A	B	B	B	B	B	B	A	B	B	X	B	A	A	A	A	A	B	B	A	B	B	A	B	X	B	B
GM04:31525671	A	B	B	A	A	B	A	A	B	B	A	A	A	B	B	A	A	B	A	B	A	A	A	B	B	B	B	B	B	A	B	B	B	B	A	A	A	A	A	B	B	B	B	B	A	B	X	B	B
GM04:32093650	A	B	B	A	A	A	A	A	B	B	A	A	A	B	B	A	A	B	A	B	A	A	A	B	B	B	B	B	B	A	B	A	A	B	A	A	A	A	A	B	B	B	B	B	A	B	X	B	B
GM04:32135095	A	B	B	A	A	A	A	A	B	B	A	A	A	B	B	A	A	B	A	B	A	A	A	B	B	B	B	B	B	A	B	A	A	B	A	A	A	A	A	B	B	B	B	B	A	B	X	B	B
GM04:32351218	A	B	B	A	A	A	A	A	B	B	A	A	A	B	B	A	A	B	A	B	A	A	A	B	B	B	B	B	B	A	B	X	B	B	A	A	A	A	A	B	B	X	B	B	A	B	X	B	B
GM04:33158695	A	B	B	A	A	A	A	A	B	B	A	A	A	B	B	A	A	B	A	B	A	A	A	X	B	B	B	B	B	A	B	X	B	B	A	A	A	A	A	B	B	X	B	B	X	B	B	B	B
GM04:33276601	A	B	B	A	A	A	A	A	B	B	A	A	A	B	B	A	A	B	A	B	A	A	A	A	B	B	B	B	B	A	B	X	A	B	A	A	A	A	A	B	B	A	B	B	A	B	A	B	B
GM04:33328323	A	B	B	A	A	X	A	A	B	B	A	A	A	B	B	A	A	B	A	B	A	A	A	B	B	B	B	B	B	A	B	B	X	B	A	A	A	A	A	B	B	B	B	B	A	B	B	B	B
GM04:33462088	A	B	B	A	A	A	A	A	B	B	A	A	A	B	B	A	A	B	A	B	A	A	A	B	B	B	B	B	B	A	B	B	A	B	A	A	A	A	A	B	B	A	B	B	A	B	B	B	B
GM04:33504461	A	B	B	A	A	A	A	A	B	B	A	A	A	X	B	A	A	X	A	B	A	A	A	B	B	B	B	B	B	A	B	B	B	B	A	A	A	A	A	B	B	B	A	B	A	B	X	A	B
GM04:33987145	A	B	B	A	A	B	A	A	B	B	A	A	A	B	B	A	A	B	A	B	A	A	A	B	B	B	B	B	A	A	B	X	B	B	A	A	A	A	A	B	B	B	B	B	A	B	X	B	B
GM04:33999458	A	B	B	A	A	X	A	A	B	B	A	A	A	B	B	A	A	B	A	B	A	A	A	B	B	B	B	B	A	A	B	A	B	B	A	A	A	A	A	B	B	A	B	B	A	B	X	B	B
GM04:34075877	A	B	B	A	A	B	A	A	B	B	A	A	A	B	B	A	A	B	A	B	A	A	A	B	B	B	B	B	B	A	B	A	A	B	A	A	A	A	A	B	B	X	B	B	A	B	B	B	B
GM04:34128586	A	B	B	A	A	B	A	A	B	B	A	A	A	B	B	A	A	B	A	B	A	A	A	B	B	B	B	B	B	A	B	A	X	B	A	A	A	A	A	B	B	A	B	B	A	B	A	B	B
GM04:34128948	A	B	B	A	A	X	A	A	B	B	A	A	A	B	B	A	A	B	A	B	A	A	A	A	B	B	B	B	A	A	B	X	A	B	A	A	A	A	A	B	B	B	B	B	A	B	A	B	B
GM04:34195443	A	B	B	A	A	X	A	A	B	B	A	A	A	B	B	A	A	B	A	B	A	A	A	B	B	B	B	B	X	A	B	A	B	B	A	A	A	A	A	B	B	B	B	B	A	B	X	B	B
GM04:34373913	A	B	B	A	A	A	A	A	B	B	A	A	A	B	B	A	A	B	A	B	A	A	A	X	B	B	B	B	A	A	B	A	A	B	A	A	A	A	A	B	B	X	B	B	A	B	X	B	B
GM04:34613254	A	B	B	A	A	X	A	A	B	B	A	A	A	B	B	A	A	B	A	B	A	A	A	X	B	B	B	B	X	A	B	A	A	B	A	A	A	A	A	B	B	X	B	B	A	B	B	B	B
GM04:34695446	A	B	B	A	A	X	A	A	B	B	A	A	A	B	B	A	A	B	A	B	A	A	A	B	B	B	B	B	A	A	B	X	B	B	A	A	A	A	A	B	B	A	B	B	A	B	B	B	B
GM04:34774743	A	B	B	A	A	B	A	A	B	B	A	A	A	B	B	A	A	B	A	B	A	A	A	B	B	B	B	B	A	A	B	B	B	B	A	A	A	A	A	B	B	A	B	B	X	B	B	B	B
GM04:34779339	X	B	B	A	A	B	A	A	B	B	A	A	A	B	B	A	A	B	A	B	A	A	A	X	B	B	B	B	X	A	B	B	B	B	A	A	A	A	A	B	B	A	B	B	A	B	B	B	B
GM04:35011753	A	B	B	A	A	A	A	A	B	B	A	A	A	B	B	A	A	B	A	B	A	A	A	A	B	B	B	B	A	A	B	B	A	B	A	A	A	A	A	B	B	A	B	B	A	B	X	B	B
GM04:35168111	A	B	B	A	A	A	A	A	B	B	A	A	A	B	B	A	A	B	A	B	A	A	A	X	B	B	B	B	A	A	B	X	B	B	A	A	A	A	A	B	B	B	B	B	A	B	B	B	B
GM04:35533929	A	B	B	A	A	X	A	A	B	B	A	A	A	B	B	A	A	B	A	B	A	A	A	A	B	B	B	B	A	A	B	A	A	B	A	A	A	A	A	B	B	A	B	B	A	B	B	B	B
GM04:35677222	A	B	B	A	A	A	A	A	B	B	A	A	A	B	B	A	A	B	A	B	A	A	A	B	B	B	B	B	X	A	B	B	B	B	A	A	A	A	A	B	B	A	B	B	A	B	B	B	B
GM04:35808057	A	B	B	A	A	X	A	A	B	B	A	A	A	B	B	A	A	B	A	B	A	A	A	B	B	B	B	B	X	A	B	X	X	B	A	A	A	A	A	B	B	B	B	B	A	B	B	B	B
GM04:35833427	A	B	B	A	A	B	A	A	B	B	A	A	A	B	B	A	A	B	A	B	A	A	A	B	B	B	B	B	X	A	B	X	A	B	A	A	A	A	A	B	B	X	B	B	A	B	B	B	B
GM04:36184660	A	B	B	A	A	B	A	A	B	B	A	A	A	B	B	A	A	B	A	B	A	A	A	B	B	B	B	B	A	A	B	A	X	B	A	A	A	A	A	B	B	X	B	B	A	B	B	B	B
GM04:36340751	A	B	B	A	A	A	A	A	B	B	A	A	A	B	B	A	A	B	A	B	A	A	A	B	B	B	B	B	X	A	B	X	B	B	A	A	A	A	A	B	B	A	B	B	A	B	X	B	B
GM04:36400394	A	B	B	A	A	B	A	A	B	B	A	A	A	B	B	A	A	B	A	B	A	A	A	B	B	B	B	B	A	A	B	A	A	B	A	A	A	A	A	B	B	A	B	B	A	B	X	B	B
GM04:36914628	A	B	B	A	A	X	A	A	B	B	A	A	A	B	B	A	A	B	A	B	A	A	A	B	B	B	B	B	X	A	B	A	X	B	A	A	A	A	A	B	B	X	B	B	A	B	X	B	B
GM04:36949349	A	B	B	A	A	B	A	A	B	B	A	A	A	B	B	A	A	B	A	B	A	A	A	B	B	B	B	B	A	A	B	X	X	B	A	A	A	A	A	B	B	B	B	B	A	B	X	B	B
GM04:37068922	A	B	B	A	A	B	A	A	B	B	A	A	A	B	B	A	A	B	A	B	A	A	A	B	B	B	B	B	X	A	B	X	B	B	A	A	A	A	A	B	B	B	B	B	A	B	X	B	B
GM04:37317438	A	B	B	A	A	B	A	A	B	B	A	A	A	B	B	A	A	B	A	B	A	A	A	B	B	B	B	B	B	A	B	B	X	B	A	A	A	A	A	B	B	B	B	B	A	B	B	B	B
GM04:37659152	A	B	B	A	A	B	A	A	B	B	A	A	A	B	B	A	A	B	A	B	A	A	A	B	B	B	B	B	X	A	B	A	B	B	A	A	A	A	A	B	B	X	B	B	A	B	X	B	B
GM04:37662935	A	B	B	A	A	X	A	A	B	B	A	A	A	B	B	A	A	B	A	B	A	A	A	B	B	B	B	B	X	A	B	A	X	B	A	A	A	A	A	B	B	X	B	B	A	B	X	B	B
GM04:37664017	A	B	B	A	A	X	A	A	B	B	A	A	A	B	B	A	A	B	A	B	A	A	A	B	B	B	B	B	X	A	B	A	X	B	A	A	A	A	A	B	B	X	B	B	A	B	X	B	B
GM04:37706397	A	B	B	A	A	X	A	A	B	B	A	A	A	B	B	A	A	B	A	B	A	A	A	B	B	B	B	B	A	A	B	A	X	B	A	A	A	A	A	B	B	X	B	B	A	B	X	B	B
GM04:38146758	A	B	B	A	A	A	A	A	B	B	A	A	A	B	B	A	A	B	A	B	A	A	A	B	B	B	B	B	X	A	B	A	X	B	A	A	A	A	A	B	B	B	B	B	A	B	B	B	B
GM04:38153280	A	B	B	A	A	X	A	A	B	B	A	A	A	B	B	A	A	B	A	B	A	A	A	B	B	B	B	B	B	A	B	A	B	B	A	A	A	A	A	B	B	B	B	B	A	B	B	B	B
GM04:38334318	A	B	B	A	A	A	A	A	B	B	A	A	A	B	B	A	A	B	A	B	A	A	A	B	B	B	B	B	X	A	B	X	X	B	A	A	A	A	A	B	B	B	B	B	A	B	B	B	B
GM04:38361534	A	B	B	A	A	A	A	A	B	B	A	A	A	B	B	A	A	B	A	B	A	A	A	B	B	B	B	B	X	A	B	A	X	B	A	A	A	A	A	B	B	A	B	B	A	B	X	B	B
GM04:38408543	A	B	B	A	A	A	A	A	B	B	A	A	A	B	B	A	A	B	A	B	A	A	A	B	B	B	B	B	B	A	B	A	X	B	A	A	A	A	A	B	B	X	B	B	A	B	X	B	B
GM04:38566571	A	B	B	A	A	A	A	A	B	B	A	A	A	B	B	A	A	B	A	B	A	A	A	B	B	B	B	B	A	A	B	A	X	B	A	A	A	A	A	B	B	X	B	B	A	B	B	B	B
GM04:38648619	A	B	B	A	A	X	A	A	B	B	A	A	A	B	B	A	A	B	A	B	A	A	A	B	B	B	B	B	B	A	B	X	B	B	A	A	A	A	A	B	B	X	B	B	A	B	X	B	B
GM04:38758836	A	B	B	A	A	X	A	A	B	B	A	A	A	B	B	A	A	X	A	B	A	A	A	B	B	B	B	B	A	A	B	X	B	B	A	A	A	A	A	B	B	X	B	B	A	B	X	B	B
GM04:39041920	A	B	B	A	A	A	A	A	B	B	A	A	A	B	B	A	A	B	A	B	A	A	A	B	B	B	B	A	A	A	B	X	B	B	A	A	A	A	A	B	B	A	B	B	A	B	B	B	B
GM04:39121046	A	B	B	A	A	B	A	A	B	B	A	A	A	B	B	A	A	B	A	B	A	A	A	B	B	B	B	B	A	A	B	X	B	B	A	A	A	A	A	B	B	A	B	B	A	B	X	B	B
GM04:39183426	A	B	B	A	A	A	A	A	B	B	A	A	A	B	B	A	A	B	A	B	A	A	A	B	B	B	B	B	A	A	B	B	B	B	A	A	A	A	A	B	B	A	B	B	A	B	A	B	B
GM04:39220180	A	B	B	A	A	X	A	A	B	B	A	A	A	B	B	A	A	B	A	B	A	A	A	B	B	B	B	B	A	A	B	A	B	B	A	A	A	A	A	B	B	A	B	B	A	B	X	B	B
GM04:39378068	A	B	B	A	A	X	A	A	B	B	A	A	A	B	B	A	A	B	A	B	A	A	A	B	B	B	B	B	X	A	B	A	B	B	A	A	A	A	A	B	B	X	B	B	A	B	B	B	B
GM04:39490040	A	B	B	A	A	A	A	A	B	B	A	A	A	B	B	A	A	B	A	B	A	A	A	B	B	B	B	B	A	A	B	A	A	B	A	A	A	A	A	B	B	A	B	B	A	B	X	B	B
GM04:39602498	A	B	B	A	A	A	A	A	B	B	A	A	A	B	B	A	A	B	A	B	A	A	A	B	B	B	B	B	X	A	B	A	A	B	A	A	A	A	A	B	B	A	B	B	A	B	X	B	B
GM04:39799170	A	B	B	A	A	A	A	A	B	B	A	A	A	B	B	A	A	B	A	B	A	A	A	B	B	B	B	B	A	A	B	B	X	B	A	A	A	A	A	B	B	A	B	B	A	B	A	B	B
GM04:39806852	A	B	B	A	A	B	A	A	B	B	A	A	A	B	B	A	A	B	A	B	A	A	A	B	B	B	B	B	X	A	B	B	X	B	A	A	A	A	A	B	B	X	B	B	A	B	X	B	B
GM04:40051535	A	B	B	A	A	X	A	A	B	B	A	A	A	B	B	A	A	B	A	B	A	A	A	B	B	B	B	B	B	A	B	B	B	B	A	A	A	A	A	B	B	X	B	B	A	B	B	B	B
GM04:40059407	A	B	B	B	A	X	A	A	B	B	A	A	A	B	B	A	A	B	A	B	A	A	A	B	B	B	B	B	X	A	B	B	B	B	A	A	A	A	A	B	B	A	B	B	A	B	A	B	B
GM04:40208599	A	B	B	A	A	X	A	A	B	B	A	A	A	B	B	A	A	B	A	B	A	A	A	B	B	B	B	B	A	A	B	A	X	B	A	A	A	A	A	B	B	A	B	B	A	B	X	B	B
GM04:40237128	A	B	B	A	A	X	A	A	B	B	A	A	A	B	B	A	A	B	A	B	A	A	A	B	B	B	B	B	A	A	B	X	B	B	A	A	A	A	A	B	B	A	B	B	A	B	B	B	B
GM04:40329012	A	B	B	A	A	X	A	A	B	B	A	A	A	B	B	A	A	B	A	B	A	A	A	X	B	B	B	B	B	A	B	B	B	B	A	A	A	A	A	B	B	A	B	B	A	B	X	B	B
GM04:40580629	A	B	B	A	A	X	A	A	B	B	A	A	A	B	B	A	A	B	A	B	A	A	A	B	B	B	B	B	X	A	B	X	X	B	A	A	A	A	A	B	B	X	B	B	A	B	X	B	B
GM04:40796238	A	B	B	A	A	A	A	A	B	B	A	A	A	B	B	A	A	B	A	B	A	A	A	B	B	B	B	B	A	A	B	A	A	B	A	A	A	A	A	B	B	X	B	B	A	B	B	B	B
GM04:40875070	A	B	B	A	A	A	A	A	B	B	A	A	A	B	B	A	A	B	A	B	A	A	A	B	B	B	B	B	X	A	B	X	A	B	A	A	A	A	A	B	B	X	B	B	A	B	X	B	B
GM04:41044746	A	B	B	A	A	X	A	A	B	B	A	A	A	B	B	A	A	B	A	B	A	A	A	B	B	B	B	B	A	A	B	A	X	B	A	A	A	A	X	B	B	A	B	B	A	B	A	B	B
GM04:41047932	A	B	B	A	A	A	A	A	B	B	A	A	A	B	B	A	A	B	A	B	A	A	A	B	B	B	B	B	A	A	B	A	A	B	A	A	A	A	A	B	B	A	B	B	A	B	A	B	B
GM04:41073373	A	B	B	A	A	B	A	A	B	B	A	A	A	B	B	A	A	B	A	B	A	A	A	B	B	B	B	B	A	A	B	X	A	B	A	A	A	A	A	B	B	X	B	B	A	B	B	B	B
GM04:41082970	A	B	B	A	A	X	A	A	B	B	A	A	A	B	B	A	A	B	A	B	A	A	A	B	B	B	B	B	A	A	B	A	B	B	A	A	A	A	A	B	B	X	B	B	A	B	X	B	B
GM04:41084034	A	B	B	A	A	X	A	A	B	B	A	A	A	B	B	A	A	B	A	B	A	A	A	B	B	B	B	B	X	A	B	X	B	B	A	A	A	A	A	B	B	X	B	B	A	B	B	B	B
GM04:41130764	A	B	B	A	A	A	A	A	B	B	A	A	A	B	B	A	A	B	A	B	A	A	A	B	B	B	B	B	A	A	B	X	X	B	A	A	A	A	A	B	B	B	B	B	A	B	B	B	B
GM04:41263964	A	B	B	A	A	B	A	A	B	B	A	A	A	B	B	A	A	B	A	B	A	A	A	B	B	B	B	A	B	A	B	A	A	B	A	A	A	A	A	B	B	B	B	B	A	B	A	B	B
GM04:41264104	A	B	B	A	A	B	A	A	B	B	A	A	A	B	B	A	A	B	A	B	A	A	A	B	B	B	B	A	B	A	B	X	B	B	A	A	A	A	A	B	B	B	B	B	A	B	B	B	B
GM04:41266960	A	B	B	A	A	A	A	A	B	B	A	A	A	B	B	A	A	B	A	B	A	A	A	B	B	B	B	B	A	A	B	X	A	B	A	A	A	A	A	B	B	B	B	B	A	B	A	B	B
GM04:41266977	A	B	B	A	A	A	A	A	B	B	A	A	A	B	B	A	A	B	A	B	A	A	A	B	B	B	B	A	A	A	B	X	A	B	A	A	A	A	A	B	B	B	B	B	A	B	A	B	B
GM04:41313024	A	B	B	A	A	B	A	A	B	B	A	A	A	B	B	A	A	B	A	B	A	A	A	B	B	B	B	B	A	A	B	X	X	B	A	A	A	A	A	B	B	B	B	B	A	B	B	B	B
GM04:41377788	A	B	B	A	A	A	A	A	B	B	A	A	A	B	B	A	A	B	A	B	A	A	A	B	B	B	B	B	A	A	B	A	B	B	A	A	A	A	A	B	B	B	B	B	A	B	A	B	B
GM04:41408070	A	B	B	A	A	X	A	A	B	B	A	A	A	B	B	A	A	B	A	B	A	A	A	B	B	B	B	B	A	A	B	X	B	B	A	A	A	A	A	B	B	B	B	B	A	B	B	B	B
GM04:41449802	A	B	B	A	A	X	A	A	B	B	A	A	A	B	B	A	A	B	A	B	A	A	A	B	B	B	B	B	A	A	B	X	A	B	A	A	A	A	A	B	B	B	B	B	A	B	B	B	B
GM04:41538706	A	B	B	A	A	X	A	A	B	B	A	A	A	B	B	A	A	B	A	B	A	A	A	B	B	B	B	B	A	A	B	B	X	B	A	A	A	A	A	B	B	B	B	B	A	B	B	B	B
GM04:41639651	A	B	B	A	A	B	A	A	B	B	A	A	A	B	B	A	A	B	A	B	A	A	A	B	B	B	B	B	A	A	B	B	A	B	A	A	A	A	A	B	B	B	B	B	A	B	B	B	B
GM04:42156185	A	B	B	A	A	A	A	A	B	B	A	A	A	B	B	A	A	B	A	B	A	A	A	B	B	B	B	B	A	A	B	X	A	B	A	A	A	A	A	B	B	B	B	B	A	B	X	B	B
GM04:42156247	A	B	B	A	A	A	A	A	B	B	A	A	A	B	B	A	A	B	A	B	A	A	A	B	B	B	B	B	A	A	B	A	A	B	A	A	A	A	A	B	B	B	B	B	A	B	X	B	B
GM04:42156299	A	B	B	A	A	A	A	A	B	B	A	A	A	B	B	A	A	B	A	B	A	A	A	B	B	B	B	B	A	A	B	A	A	B	A	A	A	A	A	B	B	X	B	B	A	B	X	B	B
GM04:42276748	A	B	B	A	A	A	A	A	B	B	A	A	A	B	B	A	A	B	A	B	A	A	A	B	B	B	B	B	A	A	B	X	B	B	A	A	A	A	A	B	B	B	B	B	A	B	B	B	B
GM04:42368274	A	B	B	A	A	X	A	A	B	B	A	A	A	B	B	A	A	B	A	B	A	A	A	B	B	B	B	B	A	A	B	A	B	B	A	A	A	A	A	B	B	X	B	B	A	B	B	B	B
GM04:42376237	A	B	B	A	A	B	A	A	B	B	A	A	A	B	B	A	A	B	A	B	A	A	A	B	B	B	B	B	A	A	B	X	B	B	A	A	A	A	A	B	B	B	B	B	A	B	B	B	B
GM04:42435599	A	B	B	A	A	A	A	A	B	B	A	A	A	B	B	A	A	B	A	B	A	A	A	B	B	B	B	B	A	A	B	A	B	B	A	A	A	A	A	B	B	X	B	B	A	B	B	B	B
GM04:46827015	B	B	B	A	A	X	A	A	B	B	A	A	B	A	B	A	A	B	A	B	A	A	A	B	B	A	B	B	A	A	B	A	A	B	A	A	B	X	B	A	B	B	A	A	A	A	B	B	B
GM04:46844669	B	B	B	A	A	A	A	A	B	B	A	A	B	A	B	A	A	B	A	B	A	A	A	B	B	A	B	B	A	A	B	A	A	B	A	A	B	X	B	A	B	A	A	A	A	A	B	B	B
GM04:46925633	B	B	B	A	A	A	A	A	B	B	A	A	B	A	B	A	A	B	A	B	A	A	A	B	B	A	B	B	A	A	B	A	A	B	A	A	B	X	B	A	B	X	A	A	A	A	B	B	B
GM04:46925690	B	B	B	A	A	A	A	A	B	B	A	A	B	A	B	A	A	B	A	B	A	A	A	B	B	A	B	B	A	A	B	A	A	B	A	A	B	X	B	A	B	B	A	A	A	A	B	B	B
GM04:46925704	B	B	B	A	A	A	A	A	B	B	A	A	B	A	B	A	A	B	A	B	A	A	A	B	B	A	B	B	A	A	B	A	A	B	A	A	B	X	B	A	B	B	A	A	A	A	B	B	B
GM04:46976440	B	B	B	A	A	A	A	A	B	B	A	A	B	A	B	A	A	B	A	B	A	A	A	B	B	A	B	B	A	A	B	X	A	B	A	A	B	X	B	A	B	B	A	A	A	A	B	B	B
GM04:47264227	B	B	B	A	A	A	A	A	B	B	A	A	B	A	B	A	A	B	A	B	A	A	A	B	B	A	B	B	A	A	B	X	A	B	A	A	B	X	X	A	B	B	A	A	A	A	X	B	B
GM04:47281313	B	B	B	A	A	A	A	A	B	B	A	A	B	A	B	A	A	B	A	B	A	A	A	B	B	A	B	B	A	A	B	X	A	B	A	A	B	X	B	A	B	A	A	A	A	A	X	B	B
GM04:47282325	X	B	B	A	A	A	A	A	B	B	A	A	B	A	B	A	A	B	A	B	A	A	A	B	B	A	B	B	A	A	B	X	A	B	A	A	B	X	X	A	B	A	A	A	A	A	A	B	B
GM04:47293978	B	B	B	A	A	X	A	A	B	B	A	A	B	A	B	A	A	B	A	B	A	A	A	B	B	A	B	B	A	A	B	X	A	B	A	A	B	X	B	A	B	A	A	A	A	A	X	B	B
GM04:47294024	B	B	B	A	A	X	A	A	B	B	A	A	B	A	B	A	A	B	A	B	A	A	A	B	B	A	B	B	A	A	B	X	A	B	A	A	B	X	B	A	B	A	A	A	A	A	X	B	B
GM04:47294148	B	B	B	A	A	X	A	A	B	B	A	A	B	A	B	A	A	B	A	B	A	A	A	B	B	A	B	B	A	A	B	X	A	B	A	A	B	X	B	A	B	A	A	A	A	A	B	B	B
GM04:47369068	B	B	B	A	A	B	A	A	B	B	A	A	B	A	B	A	A	B	A	B	A	A	A	B	B	A	B	B	A	A	B	B	A	B	A	A	B	X	X	A	B	A	A	A	A	A	X	B	B
GM04:47405915	B	B	B	A	A	B	A	A	B	B	A	A	B	A	B	A	A	B	A	B	A	A	A	B	B	A	B	B	A	B	B	A	A	B	A	A	B	A	B	A	B	A	A	A	A	A	X	B	B
GM04:47514810	B	B	B	A	A	B	A	A	B	B	A	A	B	A	B	A	A	B	B	B	A	A	A	B	B	A	B	B	A	A	B	A	A	B	A	A	B	X	B	A	B	A	A	A	A	A	B	B	A
GM04:47556260	B	B	B	A	A	B	A	A	B	B	A	A	B	X	B	A	A	B	B	B	A	A	A	B	B	A	B	B	X	B	B	A	A	B	A	A	B	B	X	A	B	B	A	A	A	A	B	B	A
GM04:47556539	B	B	X	A	A	B	A	A	B	B	A	A	B	X	B	A	A	B	B	B	A	A	A	B	B	A	B	B	A	B	B	A	A	B	A	A	B	B	X	A	B	A	A	A	A	A	X	B	A
GM04:47559339	B	B	B	A	A	B	A	A	B	B	A	A	B	A	B	A	A	B	B	B	A	A	A	B	B	A	B	B	A	B	B	A	A	B	A	A	B	X	X	A	B	A	A	A	A	A	B	B	A
GM04:47775483	B	B	B	A	A	B	A	A	B	B	A	A	B	A	B	A	A	B	A	B	A	A	A	B	B	A	B	B	B	B	B	B	A	B	A	A	B	B	X	A	B	B	A	A	A	A	A	B	A
GM04:47797940	B	B	A	A	A	B	A	A	B	B	A	A	B	A	B	A	A	B	X	B	A	A	A	B	B	A	B	B	B	B	B	B	A	B	A	A	B	B	X	A	B	B	A	A	A	A	A	B	A
GM04:47811052	B	B	B	A	A	X	A	A	B	B	A	A	B	A	B	A	A	B	A	B	A	A	A	B	B	A	B	B	A	B	B	B	A	B	A	A	B	B	X	A	B	B	A	A	A	A	X	B	A
GM04:47844783	B	B	B	A	A	B	A	A	B	B	A	A	B	A	B	A	A	B	X	B	A	A	A	B	B	A	A	B	X	B	B	B	A	B	A	A	B	B	A	A	B	B	A	A	A	A	A	B	A
GM04:49895626	A	B	B	A	A	X	A	A	B	B	A	B	A	A	A	A	A	X	B	A	A	B	A	B	B	B	A	B	A	B	B	B	A	A	X	A	B	A	A	A	B	B	B	A	X	B	B	B	X
GM04:49984854	A	A	X	A	A	A	A	A	B	B	A	B	A	A	A	A	A	A	B	A	A	B	A	B	B	B	A	X	A	B	B	B	A	A	X	A	B	A	A	A	B	B	B	A	A	B	B	B	A
GM04:50136223	A	B	B	A	X	A	A	A	B	B	A	B	A	A	A	A	A	X	B	A	A	B	A	B	B	B	A	A	A	B	B	B	A	A	B	A	B	A	A	A	B	B	B	A	A	B	B	B	X
GM04:50157889	A	A	X	A	A	X	A	A	B	B	A	B	A	A	A	A	A	B	B	A	A	B	A	B	B	B	A	X	A	B	B	B	A	A	B	A	B	A	A	A	B	B	B	A	A	B	B	B	X
GM04:50270321	A	A	X	A	A	A	A	A	B	B	A	B	A	A	A	A	A	B	B	A	A	B	A	B	B	B	A	X	A	B	B	B	A	A	B	A	B	A	A	A	B	B	B	A	X	B	B	B	A
GM04:50273421	A	X	X	A	A	A	A	A	B	B	A	B	A	A	A	A	A	X	B	A	A	B	A	B	B	B	A	A	A	B	B	B	A	A	B	A	B	A	A	A	B	B	B	A	X	B	B	B	A
GM04:50757517	A	X	B	A	A	X	A	A	B	B	A	B	A	A	A	A	A	X	B	A	A	B	A	B	B	B	A	A	A	B	B	B	A	A	B	A	X	A	A	A	B	B	B	A	A	B	B	B	B
GM04:50758389	A	A	X	A	A	A	A	A	B	B	X	B	A	A	A	A	A	B	B	A	A	B	A	B	B	B	A	A	A	B	B	B	A	A	B	A	A	A	X	A	B	B	B	A	X	B	B	B	B
GM04:50761637	A	A	X	A	A	X	A	A	B	B	A	B	A	A	A	A	A	X	B	A	A	X	A	B	B	B	A	A	A	B	B	B	A	A	B	A	A	A	A	A	B	B	B	A	A	B	B	B	B
GM04:50844160	A	A	X	A	A	X	A	A	B	B	A	B	A	A	A	A	A	A	B	A	A	B	A	B	B	B	A	A	A	B	B	B	A	A	B	A	A	A	X	A	B	B	B	A	A	B	B	B	B
GM04:50892615	A	X	X	A	A	A	A	A	B	B	A	B	A	A	A	A	A	X	B	A	A	B	A	B	B	B	A	A	A	B	B	B	A	A	B	A	B	A	B	A	B	B	B	A	A	B	B	B	B
GM04:50966276	A	X	A	A	A	B	A	A	B	B	A	B	A	A	A	A	A	X	B	A	A	A	A	B	B	B	A	A	A	B	B	B	A	A	B	A	A	A	B	A	B	B	B	A	A	B	B	B	B
GM04:51085295	A	X	X	A	A	X	A	A	B	B	X	B	A	A	A	A	A	A	B	A	A	B	A	B	B	B	A	A	A	B	B	B	A	A	B	A	A	A	B	A	B	B	B	A	A	B	B	B	B
GM04:51139624	A	X	X	A	X	X	A	A	B	B	X	B	A	A	A	A	A	A	B	A	A	B	A	B	B	B	A	A	A	B	B	B	A	A	B	A	A	A	B	A	B	B	B	A	A	B	B	B	B
GM04:51263819	A	X	A	A	A	B	A	A	B	B	B	B	A	A	A	A	A	X	B	A	A	B	A	B	B	B	A	A	A	B	B	B	A	A	B	A	A	A	B	A	B	B	B	A	A	B	B	B	B
GM04:51271031	A	X	B	A	A	A	A	A	B	B	X	B	A	A	A	A	A	X	B	A	A	B	A	B	B	B	A	A	A	B	B	B	A	A	B	A	A	A	X	A	B	B	B	A	A	B	B	B	B
GM04:51751879	A	B	X	A	A	A	A	X	B	B	B	B	A	A	A	A	A	B	B	A	A	B	A	B	B	B	A	A	B	B	B	B	A	A	B	A	B	A	B	A	B	B	B	A	A	B	B	B	B
GM04:51889114	A	B	A	A	A	B	A	X	B	B	A	B	A	A	A	A	A	A	B	A	A	B	A	B	B	B	A	A	B	B	B	B	A	A	B	A	X	A	X	A	B	B	A	A	A	B	X	B	B
GM04:51923249	A	B	A	A	A	A	A	B	B	B	X	B	A	A	A	A	A	A	B	A	A	B	A	B	B	B	A	A	B	B	B	B	A	A	B	A	X	A	B	A	B	B	A	A	A	B	X	B	B
GM04:52083889	A	B	A	A	B	A	A	X	B	B	X	B	A	A	A	A	A	A	B	A	A	B	A	B	B	B	A	A	B	B	B	B	A	A	B	A	X	A	X	A	B	B	A	A	A	B	X	B	B
GM04:52088188	A	B	X	A	A	A	A	B	B	B	B	B	A	A	A	A	A	X	B	A	A	B	A	B	B	B	A	A	B	B	B	B	A	A	B	A	X	A	A	A	B	B	A	A	A	B	B	B	B
GM05:130387	X	A	B	A	A	B	B	B	B	B	B	B	A	B	B	B	A	A	B	A	B	B	B	B	A	B	B	B	B	B	B	A	B	A	B	B	B	B	B	A	A	A	A	A	B	A	A	B	A
GM05:1731966	B	A	B	A	A	B	X	A	B	B	B	A	B	B	B	B	A	A	B	B	B	B	B	B	A	B	A	B	B	B	B	B	A	A	B	B	B	B	B	A	A	B	A	A	A	A	B	B	A
GM05:1753704	B	A	B	A	A	B	X	A	B	B	B	A	B	B	B	B	A	A	B	B	B	X	B	X	A	B	B	B	B	B	B	B	A	A	B	B	B	B	B	A	A	B	A	A	A	A	B	B	A
GM05:1816339	B	A	B	A	A	B	A	A	B	B	B	A	B	B	B	B	A	A	B	B	B	B	B	B	A	B	B	B	B	B	B	B	A	A	B	B	B	B	B	A	A	B	A	A	A	A	B	B	A
GM05:1819850	X	A	B	A	A	X	A	A	B	B	B	A	B	B	B	B	A	A	B	B	A	A	B	A	A	B	B	B	B	B	B	B	A	A	B	B	B	B	B	A	A	B	A	A	A	A	B	B	A
GM05:1829158	A	A	B	A	A	B	X	A	B	B	B	A	B	B	B	B	A	A	B	B	B	X	B	B	A	B	B	B	B	B	B	B	A	A	B	B	B	B	B	A	A	B	A	A	A	A	B	B	A
GM05:1840805	B	A	B	A	A	A	A	A	B	B	B	A	B	B	B	B	A	A	B	B	B	X	B	B	A	B	B	B	B	B	B	B	A	A	B	B	B	B	B	A	A	B	A	A	A	A	B	B	A
GM05:1859174	A	A	B	A	A	B	X	A	B	B	B	A	B	B	B	B	A	A	B	B	A	A	B	A	A	B	B	B	B	B	B	B	A	A	B	B	B	B	B	A	A	B	A	A	A	A	B	B	A
GM05:1958113	A	A	B	A	A	B	B	A	B	B	B	A	B	B	B	B	A	A	B	B	B	X	A	X	A	B	B	B	B	B	B	B	A	A	B	B	A	B	B	A	A	B	A	A	A	A	B	A	A
GM05:2338209	X	B	B	A	A	B	B	A	B	B	B	A	B	B	A	X	A	A	B	B	B	X	A	X	A	B	B	B	B	B	B	B	A	A	B	B	A	B	B	A	A	B	A	A	A	A	B	A	A
GM05:2548993	B	B	X	A	A	B	B	A	B	B	B	A	B	B	X	B	A	A	B	B	B	B	A	X	A	B	B	B	B	B	B	B	A	A	B	B	A	B	B	A	A	B	A	A	A	A	B	A	A
GM05:2690367	B	A	A	A	A	B	B	A	B	B	B	A	B	B	A	X	A	A	B	B	A	B	A	A	A	B	B	B	B	B	B	B	A	A	B	B	A	B	B	A	A	B	A	A	A	A	B	A	A
GM05:2710906	B	A	X	A	A	B	B	A	B	B	B	A	B	B	B	X	A	A	B	B	A	B	A	A	A	B	B	B	B	B	B	B	A	A	B	B	A	B	B	A	A	B	A	A	X	A	B	A	A
GM05:2716145	B	A	A	A	A	B	B	A	B	B	B	A	B	B	A	X	A	A	B	B	A	B	A	A	A	B	B	B	B	B	B	B	A	A	B	B	A	B	B	A	A	B	A	A	A	A	B	A	A
GM05:2743924	B	A	A	X	A	B	B	A	B	B	B	A	B	B	A	A	A	A	B	B	A	B	A	A	A	B	B	B	B	B	B	B	A	A	B	B	A	B	B	A	A	B	A	A	A	A	A	A	A
GM05:2756917	B	A	X	A	A	B	B	A	B	B	B	A	B	B	A	A	A	A	B	B	A	B	A	A	A	B	B	B	B	B	B	B	A	A	B	B	A	B	B	A	A	B	A	A	A	A	B	A	A
GM05:2771748	B	A	X	A	A	B	B	A	B	B	B	A	B	B	A	A	A	A	B	B	A	B	A	A	A	B	B	B	B	B	B	B	A	A	B	B	A	B	B	A	A	B	A	A	A	A	B	A	A
GM05:2849084	B	A	B	A	A	B	B	A	B	B	B	A	B	B	B	B	A	A	B	B	A	B	A	A	A	B	B	B	B	B	B	B	A	A	B	B	A	B	B	A	A	B	A	A	X	A	B	A	A
GM05:2894334	B	A	B	A	A	B	B	A	B	B	B	A	B	B	B	B	A	A	B	B	A	B	A	A	A	B	B	B	B	B	B	B	A	A	B	B	A	B	B	A	A	B	A	A	X	A	B	A	A
GM05:2986558	B	A	A	A	A	B	B	A	B	B	B	A	B	B	A	A	A	A	B	B	A	B	A	A	A	B	B	B	B	B	B	B	A	A	B	B	A	B	B	A	A	B	A	A	A	A	A	A	A
GM05:2989645	B	A	B	A	A	B	B	A	B	B	B	A	B	B	X	X	A	A	B	B	A	B	A	A	A	B	B	B	B	B	B	B	A	A	B	B	A	B	B	A	A	B	A	A	X	A	B	A	A
GM05:2995666	B	A	A	A	A	B	B	A	B	B	B	A	B	B	B	X	A	A	B	B	A	B	A	A	A	B	B	B	B	B	B	B	A	A	B	B	A	B	B	A	A	B	A	A	A	A	A	A	A
GM05:3081540	B	A	A	A	A	B	B	A	B	B	B	A	B	B	A	A	A	A	B	B	A	B	A	A	A	B	B	B	B	B	B	B	A	A	B	B	A	B	B	A	A	B	A	A	X	A	B	A	A
GM05:3124214	B	A	B	A	A	B	B	A	B	B	B	A	B	B	X	X	A	A	B	B	A	B	A	A	A	B	B	B	B	B	B	B	A	A	B	B	A	B	B	A	A	B	A	A	X	A	X	A	A
GM05:3131389	B	A	A	A	A	B	B	A	B	B	B	A	B	B	A	X	A	A	B	B	A	B	A	A	A	B	B	B	B	B	B	B	A	A	B	B	A	B	B	A	A	B	A	A	B	A	A	A	A
GM05:3144730	B	A	A	A	A	B	B	A	B	B	B	A	B	B	A	X	A	A	B	B	A	B	A	A	A	B	B	B	B	B	B	B	A	A	B	B	A	B	B	A	A	B	A	A	X	A	X	A	A
GM05:3144791	B	A	X	A	A	B	B	A	B	B	B	A	B	B	A	X	A	A	B	B	A	B	A	A	A	B	B	B	B	B	B	B	A	A	B	B	A	B	B	A	A	B	A	A	X	A	X	A	A
GM05:3167692	B	A	X	A	A	B	B	A	B	B	B	A	B	B	A	X	A	A	B	B	A	B	A	A	A	B	B	B	B	B	B	B	A	A	B	B	A	B	B	A	A	B	A	A	B	A	A	A	A
GM05:3167836	B	B	A	A	A	B	B	A	B	B	B	A	B	B	X	X	A	A	B	B	A	B	A	A	A	B	B	B	B	B	B	B	A	A	B	B	A	B	B	B	A	B	A	A	A	A	B	A	A
GM05:3316903	B	B	A	A	A	B	B	A	B	A	B	A	B	B	X	X	A	A	B	B	A	B	A	A	A	B	B	B	B	B	B	B	A	A	B	B	A	B	B	B	A	B	A	A	X	A	X	A	A
GM05:3500329	B	A	A	A	A	B	B	A	B	A	B	A	B	B	A	A	A	A	B	B	A	B	A	A	A	B	B	B	B	B	B	B	A	A	B	B	A	B	B	A	A	B	A	A	X	A	A	A	A
GM05:3543164	B	A	A	A	A	B	B	A	B	A	B	A	B	B	A	A	A	A	B	B	A	B	A	A	A	B	B	B	B	B	B	B	A	A	B	B	A	B	B	A	A	B	A	A	X	A	B	A	A
GM05:3583876	B	B	A	A	A	B	B	A	B	A	B	A	B	B	A	A	A	A	B	B	A	B	X	A	A	B	B	B	B	B	B	B	A	A	B	B	A	B	B	B	A	B	A	A	X	A	B	A	A
GM05:3584733	B	X	X	A	A	B	B	A	B	A	B	A	B	B	A	A	A	A	B	B	A	B	X	A	A	B	B	B	B	B	B	B	A	A	B	B	A	B	B	A	A	B	A	A	X	A	B	A	A
GM05:3709191	B	X	A	A	A	B	B	A	B	A	B	A	B	B	A	A	A	A	B	B	A	B	X	A	A	B	B	B	B	B	B	B	A	A	B	B	A	B	B	B	A	B	A	A	X	A	A	A	A
GM05:3769727	B	B	X	A	A	B	B	A	B	A	B	A	B	B	A	A	A	A	B	B	A	B	X	A	A	B	B	B	B	B	B	B	A	A	B	B	A	B	B	A	A	B	A	A	X	A	B	A	A
GM05:3884649	B	B	A	A	A	B	B	A	B	A	B	A	B	B	A	A	A	A	B	B	A	B	B	A	A	B	B	B	B	B	B	B	A	A	B	B	A	B	B	A	A	B	A	A	A	A	B	A	A
GM05:3902580	B	B	X	A	A	B	B	A	B	A	B	A	B	B	A	A	A	A	B	B	A	B	B	A	A	B	B	B	B	B	B	B	A	A	B	B	A	B	B	A	A	B	A	A	X	A	X	A	A
GM05:4355756	A	B	X	A	A	B	B	A	B	A	B	A	X	B	A	A	A	A	B	B	B	B	B	A	A	B	B	B	B	B	B	B	A	A	B	B	A	B	B	B	A	B	A	A	B	B	B	A	A
GM05:4387230	A	B	A	A	A	A	B	A	B	A	B	A	X	B	A	A	A	A	B	B	B	B	B	A	A	B	B	B	B	B	B	B	A	A	B	B	A	B	B	B	A	B	A	A	X	B	B	A	A
GM05:4684569	A	B	A	A	A	A	B	X	B	A	B	A	A	B	A	A	A	A	B	B	B	B	B	A	A	B	B	B	B	B	B	B	A	A	B	B	A	A	B	B	A	B	A	A	B	B	B	A	A
GM05:21496584	A	B	A	B	B	A	B	B	B	A	B	B	A	A	A	A	B	X	B	B	B	B	A	A	B	B	B	B	A	B	B	B	X	A	B	B	A	A	A	A	B	B	A	A	B	B	B	B	B
GM05:25583053	A	B	A	B	B	A	B	B	B	A	B	B	A	A	A	A	B	X	B	B	B	B	A	A	B	B	B	B	A	B	B	B	X	A	B	B	A	A	A	A	B	B	A	A	B	B	B	B	B
GM05:27824530	A	B	A	B	B	A	A	B	B	A	B	B	A	A	A	A	B	B	B	B	B	B	A	A	B	B	B	B	A	B	B	B	B	A	B	B	A	A	A	A	B	B	A	A	B	B	B	B	B
GM05:27909898	A	B	A	B	B	A	A	B	B	B	B	B	A	A	A	A	B	B	B	B	B	B	A	A	B	B	B	B	A	B	B	B	B	A	X	B	A	A	A	A	B	B	A	A	B	B	B	B	B
GM05:28271426	A	B	A	B	B	A	A	B	B	X	B	B	A	A	B	A	B	B	B	B	B	B	B	A	B	B	B	B	A	B	B	B	X	A	B	B	X	A	A	A	B	B	A	A	B	B	B	B	B
GM05:32411113	A	B	A	B	B	A	A	A	B	A	B	X	A	A	B	A	B	B	B	X	B	B	B	A	B	X	B	B	A	B	B	B	A	A	A	B	B	A	A	A	B	B	A	A	B	A	B	B	B
GM05:32612068	A	B	A	B	B	A	A	A	X	B	B	X	A	A	B	A	B	B	B	X	B	B	B	A	B	A	B	B	A	B	B	B	A	A	A	B	B	A	A	A	B	B	A	A	B	A	B	B	B
GM05:34377919	A	B	A	B	B	A	A	A	A	A	A	X	A	B	B	A	B	A	B	B	B	A	A	B	X	A	A	B	B	A	A	A	B	A	A	B	B	A	B	A	B	X	A	A	X	A	A	A	B
GM05:34583367	A	B	B	A	B	A	A	A	A	A	A	A	A	B	B	A	X	A	B	B	B	A	A	B	X	A	A	A	A	A	A	A	B	A	A	B	B	A	B	A	B	X	A	A	A	A	A	A	B
GM05:34583525	A	B	A	A	B	A	A	A	A	A	A	A	A	B	B	A	X	A	B	B	B	A	A	B	X	A	A	A	B	A	A	A	B	A	A	B	B	A	B	A	B	X	A	A	A	A	A	A	B
GM05:34905839	A	B	A	A	B	A	A	A	A	A	A	A	A	B	B	A	A	A	B	B	B	A	A	B	A	A	A	A	B	A	A	A	B	A	A	B	A	A	B	A	B	X	A	A	A	A	A	A	B
GM05:35117392	A	B	B	A	B	A	A	A	A	A	A	A	A	B	B	A	A	A	B	B	B	A	A	B	A	A	A	A	B	A	A	A	B	A	A	B	A	A	B	A	B	X	A	A	A	A	A	A	B
GM05:35122327	A	B	B	X	B	A	A	A	A	A	A	A	A	B	B	A	A	A	B	B	B	A	A	B	A	A	A	A	B	A	A	A	B	A	A	B	A	A	B	A	B	B	A	A	X	A	A	X	B
GM05:35129803	A	B	B	A	X	A	A	A	A	A	A	A	A	B	B	A	A	A	B	B	A	A	A	B	A	A	A	A	B	A	A	A	B	A	A	B	A	A	B	A	B	X	A	A	X	A	A	A	B
GM05:35158381	A	B	B	A	B	A	A	A	A	A	A	A	A	B	B	A	A	A	B	B	B	A	A	B	A	A	A	A	A	A	A	A	B	A	A	B	A	A	B	A	B	X	A	A	A	A	A	X	B
GM05:35406969	A	B	B	A	B	A	A	A	A	A	A	A	A	B	B	A	A	A	B	B	B	A	B	B	A	A	A	A	A	A	A	A	B	A	A	B	A	A	B	A	B	B	A	A	A	A	A	B	B
GM05:35419945	A	B	B	B	B	A	A	A	A	A	A	A	A	B	B	A	A	A	B	B	B	A	B	B	A	A	A	A	X	A	A	A	B	A	A	B	A	A	B	A	B	B	A	A	X	A	A	X	B
GM05:35511312	A	B	B	B	B	A	A	A	A	A	A	A	A	B	B	A	A	A	B	B	B	X	B	B	A	A	A	A	B	A	A	A	B	A	A	B	A	A	B	A	B	B	A	A	X	A	A	B	B
GM05:35534054	A	B	B	A	B	A	A	A	A	A	A	A	A	B	B	A	A	A	B	B	B	A	B	B	A	A	A	A	A	A	A	A	B	A	A	B	A	A	B	A	B	X	A	A	A	A	A	B	B
GM05:35695498	A	B	B	A	B	A	A	A	A	A	A	A	A	B	B	A	A	A	B	B	B	A	B	B	A	A	A	A	X	A	A	A	B	A	A	B	A	A	B	A	B	B	A	A	A	A	A	A	B
GM05:35824337	A	B	B	A	B	A	A	A	A	A	A	A	A	B	B	A	A	A	B	B	A	A	B	B	A	A	A	A	B	A	A	A	B	A	A	B	A	A	B	A	B	B	A	A	A	A	A	B	B
GM05:35859979	A	B	B	A	B	X	A	A	A	A	A	A	A	B	B	A	A	A	B	B	B	A	B	B	A	A	A	A	B	A	A	A	B	A	A	B	A	A	B	A	B	B	A	A	A	A	A	B	B
GM05:36007569	A	B	B	A	B	A	A	A	A	A	A	A	X	B	B	A	A	A	B	B	B	A	B	B	A	A	A	A	B	A	A	A	B	A	A	B	A	A	B	A	B	B	A	A	A	A	A	X	B
GM05:36108741	A	B	B	A	B	A	A	A	A	A	A	A	A	B	B	A	A	A	B	B	B	A	B	B	A	A	A	A	X	A	A	A	B	A	A	X	A	A	B	A	B	A	A	A	A	A	A	X	B
GM05:36989798	A	B	B	A	A	A	A	A	A	A	A	A	B	B	B	A	A	A	B	B	B	A	B	B	A	A	A	A	X	A	A	A	B	A	A	B	A	A	B	A	B	A	B	A	A	A	A	B	X
GM05:37040144	X	B	B	A	A	A	A	A	A	A	A	A	B	B	B	A	A	A	B	B	B	A	B	B	A	A	A	A	X	A	A	A	B	A	A	B	A	A	B	A	B	A	B	A	A	A	A	X	X
GM05:37498455	A	B	B	A	A	A	A	A	A	B	A	A	B	B	B	A	A	A	B	B	B	A	B	B	A	B	A	A	B	A	A	A	B	A	A	X	A	A	B	B	B	A	B	A	A	A	A	X	X
GM05:37557447	A	B	B	A	A	A	A	A	A	B	A	A	B	B	B	A	A	A	B	B	B	A	B	B	A	B	A	A	B	A	A	A	B	A	A	B	A	A	B	B	B	A	B	A	A	A	A	X	A
GM05:37568036	A	B	B	A	A	A	A	A	A	B	A	A	B	B	B	A	A	A	B	B	B	A	B	B	A	A	A	A	A	A	A	A	B	A	A	B	A	A	B	B	B	A	B	A	A	A	A	B	X
GM05:37696443	A	B	B	A	A	A	A	A	B	B	A	A	B	B	B	A	A	A	B	X	A	A	B	B	A	B	A	A	X	A	A	A	B	A	B	B	A	A	B	B	B	A	B	A	A	A	A	B	A
GM05:37701613	A	B	B	A	A	A	A	A	B	B	A	A	B	B	B	A	A	A	B	B	A	A	B	B	A	X	A	A	X	A	A	A	B	A	B	B	A	A	B	B	B	B	B	A	A	A	A	B	X
GM05:37701726	A	B	B	A	A	A	A	A	B	B	A	A	B	B	B	A	A	A	B	B	B	A	B	B	A	X	A	A	A	A	A	A	B	A	B	B	A	A	B	B	B	A	B	A	A	A	A	B	B
GM05:37759117	A	B	B	A	A	A	A	A	B	B	A	A	B	B	B	B	A	B	B	B	B	A	B	B	A	B	A	A	A	A	A	A	B	A	B	B	A	A	B	B	B	B	B	A	A	A	A	B	B
GM05:37787117	A	B	B	A	A	A	A	A	B	B	A	A	B	B	B	B	A	B	B	B	B	A	B	B	A	B	A	A	B	A	A	A	B	A	B	B	A	A	B	B	B	B	B	A	A	A	A	B	X
GM05:37813523	A	B	B	A	A	A	A	A	B	B	A	A	B	B	B	B	A	B	B	B	A	A	B	B	A	B	A	A	B	A	A	A	B	A	B	B	A	A	B	B	B	X	B	A	A	A	A	B	B
GM05:37831231	A	B	B	A	A	A	A	A	B	B	A	A	B	B	B	B	A	B	B	B	X	A	B	B	A	X	A	A	B	A	A	A	B	A	B	B	A	A	B	B	B	A	B	A	A	A	A	B	X
GM05:37852404	A	B	B	A	A	A	A	A	B	B	A	A	B	B	B	B	A	B	B	B	X	A	B	B	A	X	A	A	B	B	A	A	B	A	B	B	A	A	B	B	B	X	B	A	A	A	A	B	B
GM05:37866298	A	B	B	A	A	A	A	A	B	B	A	A	B	B	B	B	A	B	B	B	B	A	B	B	A	B	A	A	B	B	A	A	B	A	B	B	A	A	B	B	B	B	B	A	A	A	A	B	B
GM05:37873188	A	B	B	A	A	A	A	A	B	B	A	A	B	B	B	B	A	B	B	B	B	A	B	B	A	B	A	A	B	B	A	A	B	A	B	B	A	A	B	B	B	A	B	A	A	A	A	B	B
GM05:37963870	A	B	B	A	A	A	A	A	B	B	A	A	B	B	B	B	A	B	B	B	X	A	B	B	A	X	A	A	B	B	A	A	B	A	B	B	A	A	B	B	B	X	B	A	A	A	A	B	X
GM05:37986184	A	B	B	A	A	A	A	A	B	B	A	A	B	B	B	B	A	B	B	X	B	A	B	B	A	B	A	A	B	B	A	A	B	A	B	B	A	A	B	B	B	A	B	A	A	A	A	B	B
GM05:38005184	A	B	B	A	A	A	A	A	B	B	A	A	B	B	B	B	A	B	B	B	B	A	B	B	A	X	A	A	B	B	A	A	B	A	B	B	A	A	B	B	B	A	B	A	A	A	A	B	X
GM05:38159403	A	B	B	A	A	A	A	A	B	B	A	A	B	B	B	B	A	B	B	X	B	A	B	B	A	A	A	A	B	B	A	A	B	A	B	B	A	A	B	B	B	A	B	A	A	A	A	B	B
GM05:38217847	A	B	B	A	A	A	A	A	B	B	A	A	B	B	B	B	A	B	B	B	B	A	B	B	A	X	A	A	B	B	A	A	B	A	B	B	A	A	B	B	B	A	B	A	A	A	A	B	X
GM05:38245120	A	B	B	A	A	A	A	A	B	B	A	A	B	B	B	B	A	B	B	B	B	A	B	B	A	B	A	A	B	B	A	A	B	A	B	B	A	A	B	B	B	A	B	A	A	A	A	B	B
GM05:38276766	A	B	B	A	A	A	A	A	B	B	A	A	B	B	B	B	A	B	B	B	B	A	B	B	A	A	A	A	B	B	A	A	B	A	B	B	A	A	B	B	B	A	B	A	A	A	A	B	B
GM05:38420785	A	B	B	A	A	A	A	A	B	B	A	A	B	B	B	B	A	B	B	X	A	A	B	B	A	B	A	A	B	B	A	A	A	A	B	B	A	A	B	B	B	A	B	A	A	A	A	B	B
GM05:38440675	A	B	B	A	A	A	A	A	B	B	A	A	B	B	B	B	A	B	B	B	A	A	B	B	A	B	A	A	B	B	A	A	A	A	B	B	A	A	B	B	B	A	B	A	A	A	A	B	X
GM05:38464601	A	B	B	A	A	A	A	A	B	B	B	A	B	B	B	B	A	B	B	B	A	A	B	B	A	A	A	A	B	B	A	A	A	A	B	B	A	A	B	B	A	A	B	A	A	B	A	B	A
GM05:38549696	A	B	B	A	A	A	A	A	B	B	B	A	B	B	B	B	A	B	B	X	A	A	B	B	A	A	A	A	B	B	A	A	A	A	B	B	A	A	B	B	A	A	B	A	A	B	A	B	B
GM05:38841882	A	B	B	A	A	A	A	A	B	B	B	A	B	B	B	B	A	B	B	B	B	A	B	B	A	B	A	A	B	B	A	A	A	A	B	B	A	A	B	B	X	A	B	A	A	B	A	B	A
GM05:38924254	A	B	B	A	A	A	A	A	B	B	B	A	B	B	A	B	A	B	B	B	A	A	B	B	A	A	A	A	B	B	A	A	A	A	B	B	A	A	X	B	X	A	B	A	A	B	A	B	A
GM05:38934386	A	B	B	A	A	A	A	A	B	B	B	A	B	B	B	B	A	B	B	B	X	A	B	B	A	A	A	A	B	B	A	A	A	A	B	B	A	A	X	B	X	A	B	A	A	B	A	B	A
GM05:38947869	A	B	B	A	A	A	A	A	B	B	B	A	B	B	B	B	A	B	B	B	X	A	B	B	A	B	A	A	B	B	A	A	A	A	B	B	A	A	X	B	B	A	B	A	A	B	X	B	A
GM05:39057251	A	B	B	A	A	A	A	A	B	B	B	A	B	B	A	B	A	B	B	B	B	A	B	B	A	B	A	A	B	B	A	A	A	A	B	B	A	A	A	B	B	A	B	A	X	B	A	B	A
GM05:39105377	A	B	B	A	A	A	A	A	B	B	B	A	B	B	B	B	A	B	B	B	B	A	B	B	A	A	A	A	B	B	A	A	A	A	B	B	A	A	A	B	A	A	B	A	A	B	A	B	A
GM05:39164186	A	B	B	A	A	A	A	A	B	B	B	A	B	B	B	B	A	B	B	B	B	A	B	B	A	A	A	A	B	B	A	A	A	A	B	B	A	A	A	B	A	A	B	X	X	B	A	B	A
GM05:39164202	A	B	B	A	A	A	A	A	B	B	B	A	B	B	B	B	A	B	B	B	B	A	B	B	A	A	A	A	B	B	A	A	A	A	B	B	A	A	A	B	B	A	B	X	A	B	A	B	A
GM05:39208436	A	B	B	A	A	A	A	A	B	B	B	A	B	B	B	B	A	B	B	B	B	A	B	B	A	A	A	A	B	B	A	A	A	A	B	B	A	A	X	B	B	A	B	A	A	B	A	B	A
GM05:39257267	X	B	B	A	A	A	A	A	B	B	B	A	B	B	B	B	A	B	B	A	B	A	B	B	A	A	A	A	B	B	A	A	A	A	B	X	A	A	A	B	B	A	B	A	A	B	A	B	A
GM05:39325064	A	B	B	A	A	A	A	A	B	B	B	A	B	B	B	B	A	B	B	B	B	A	B	B	A	A	A	A	B	B	A	A	A	A	B	B	A	A	B	B	B	A	B	A	A	B	A	B	A
GM05:39359720	X	B	B	A	A	A	A	A	B	B	B	A	B	B	B	B	A	B	B	A	X	A	B	B	A	A	A	A	B	B	A	A	A	A	B	B	A	A	A	B	B	A	B	A	A	B	A	B	A
GM05:39490883	A	B	B	A	A	A	A	A	B	B	B	A	B	B	B	B	A	B	B	X	B	A	B	B	A	A	A	A	B	B	A	A	A	A	B	B	A	A	A	B	A	A	B	A	A	B	A	B	A
GM05:39524554	A	B	B	A	A	A	A	A	B	B	B	A	B	B	B	B	A	B	B	B	A	A	B	B	A	X	A	A	B	B	A	A	A	A	B	B	A	A	A	B	A	A	B	A	A	B	A	B	A
GM05:39569075	B	B	B	A	A	A	A	A	B	B	B	A	B	B	B	B	A	B	B	B	A	A	B	B	A	B	A	A	B	B	A	A	A	A	B	B	A	A	B	B	B	A	B	X	A	B	A	B	A
GM05:39862317	A	B	B	A	A	A	A	A	B	B	B	A	B	B	B	B	A	B	B	B	B	A	B	B	A	X	A	A	B	B	A	A	A	A	B	B	A	A	A	B	A	A	B	A	A	B	A	B	A
GM05:39862410	A	B	B	A	A	A	A	A	B	B	B	A	B	B	B	B	A	B	B	B	B	A	B	B	A	X	A	A	B	B	A	A	A	A	B	A	A	A	A	B	A	A	B	A	A	B	A	B	A
GM05:39986960	A	B	B	A	A	A	A	A	B	B	B	A	B	B	B	B	A	B	B	B	B	A	B	B	A	X	A	A	B	B	A	A	A	A	B	B	A	A	A	B	A	A	B	A	A	B	A	B	A
GM05:40038630	X	B	B	A	A	A	A	A	B	B	B	A	B	B	B	B	A	B	B	B	X	A	B	B	A	B	A	A	B	B	A	A	A	B	B	B	A	A	B	B	X	A	B	X	A	B	A	B	A
GM05:40147705	X	B	B	A	A	A	A	A	B	B	B	A	B	B	B	X	A	B	B	B	B	A	B	B	A	B	A	A	B	B	A	A	A	B	B	B	A	A	X	B	B	A	B	A	A	B	A	B	A
GM05:40157205	X	B	B	A	A	A	A	A	B	B	B	A	B	B	B	B	A	B	B	B	X	A	B	B	A	B	A	A	B	B	A	A	A	B	B	B	A	A	A	B	A	A	B	A	A	B	A	B	A
GM05:40157288	X	B	B	A	A	A	A	A	B	B	B	A	B	B	B	B	A	B	B	B	X	A	B	B	A	B	A	A	B	B	A	A	A	B	B	B	A	A	X	A	A	A	B	A	A	B	A	B	A
GM05:40163881	X	B	B	A	A	A	A	A	B	B	B	A	B	B	B	B	A	B	B	B	B	A	B	B	A	B	A	A	B	B	A	A	A	B	B	B	A	A	B	B	B	A	B	A	A	B	A	B	A
GM05:40164033	X	B	B	A	A	A	A	A	B	B	B	A	B	B	B	B	A	B	B	B	X	A	B	B	A	B	A	A	B	B	A	A	A	B	B	B	A	A	B	B	X	A	B	A	A	B	A	B	A
GM05:40166382	X	B	B	A	A	A	A	A	B	B	B	A	B	B	B	B	A	B	B	B	B	A	B	B	A	B	A	A	B	B	A	A	A	B	B	B	A	A	B	B	A	A	B	A	A	B	A	B	A
GM05:40182920	X	B	B	A	A	A	A	A	B	B	B	A	B	B	B	B	A	B	B	B	X	A	B	B	A	B	A	A	B	B	A	A	A	B	B	B	A	A	A	B	A	A	B	A	A	B	A	B	A
GM05:40209527	X	B	B	A	A	A	A	A	B	B	B	A	B	B	B	B	A	B	B	B	B	A	B	B	A	B	A	A	B	B	A	A	A	B	B	B	A	A	X	B	B	A	B	A	A	B	A	B	A
GM05:40211684	A	B	B	A	A	A	A	A	B	B	B	A	B	B	B	B	A	B	B	B	X	A	B	B	A	B	A	A	B	B	A	A	A	B	B	B	A	A	A	B	X	A	B	A	A	B	A	B	A
GM05:40292859	A	B	B	A	A	A	A	A	B	B	B	A	B	B	B	X	A	B	B	B	B	A	B	B	A	B	A	A	B	B	A	A	A	B	B	B	A	A	B	B	A	A	B	A	A	B	A	B	A
GM05:40349707	B	B	B	A	A	A	A	A	A	B	B	A	B	B	B	B	A	B	B	A	B	B	B	B	A	B	A	A	B	B	A	A	A	B	B	B	A	A	B	B	A	A	B	A	A	B	A	B	A
GM05:40407412	A	B	B	A	A	A	A	A	A	B	B	A	A	B	B	B	A	B	B	A	X	B	B	B	A	B	A	A	B	B	A	A	A	A	B	B	A	A	B	B	A	A	B	A	A	B	A	B	A
GM05:40467080	A	B	B	A	A	A	A	A	A	B	B	A	B	B	B	A	A	B	B	A	X	X	B	B	A	B	A	A	B	B	A	A	A	B	B	B	A	A	B	B	A	A	B	A	A	B	A	B	A
GM05:40736553	A	B	B	A	A	A	A	A	A	B	B	A	B	B	B	B	A	B	B	A	X	X	B	B	A	B	A	A	B	B	A	A	A	B	B	B	A	A	B	B	A	A	B	A	A	B	A	B	A
GM05:40808476	X	B	B	A	A	A	A	A	A	B	B	A	B	B	B	X	A	B	B	A	B	X	B	B	A	B	A	A	B	B	A	A	A	B	B	B	A	A	A	B	A	A	B	A	A	B	A	B	A
GM05:40820956	X	B	B	A	A	A	A	A	A	B	B	A	B	B	B	B	A	B	B	A	B	A	B	B	A	B	A	A	B	B	A	A	A	B	B	B	A	A	A	B	A	A	B	A	A	B	A	B	A
GM05:40920529	X	B	B	A	A	A	A	A	A	B	B	A	B	B	B	B	A	B	B	A	X	B	B	B	A	B	A	A	B	B	A	A	A	B	B	B	A	A	B	B	A	A	B	A	A	B	A	B	A
GM05:41123772	X	B	B	A	A	A	A	A	A	B	B	A	B	B	B	B	A	B	B	A	B	X	B	B	A	B	A	A	B	B	A	A	A	B	B	B	A	A	B	B	A	A	B	A	A	B	A	B	A
GM05:41392627	A	B	B	X	A	A	A	A	A	B	B	A	B	B	B	A	A	B	B	A	X	A	B	A	A	B	A	A	B	B	A	A	A	B	B	B	A	A	A	B	B	A	B	A	A	B	B	A	A
GM05:41415752	A	B	B	A	A	A	A	A	A	B	B	A	B	B	B	X	A	B	B	A	X	X	B	A	A	B	A	A	B	B	A	A	A	B	B	B	A	A	A	B	A	A	B	A	A	B	B	A	A
GM05:41588038	A	B	B	A	A	A	A	A	A	B	B	A	B	B	B	A	A	B	B	A	B	X	B	A	A	B	A	A	B	B	A	A	A	B	B	B	A	A	A	B	A	A	B	A	A	B	B	A	A
GM05:41877748	X	B	B	A	A	A	A	A	B	B	B	A	X	B	B	A	B	B	B	A	B	X	B	A	A	B	A	A	B	B	A	A	A	B	B	B	A	A	A	B	A	A	B	A	A	B	B	A	A
GM05:41912524	A	B	B	B	A	A	A	A	B	B	B	A	B	B	B	A	B	B	B	A	B	X	B	A	A	B	A	A	B	B	A	A	A	B	B	B	A	A	A	B	A	A	B	A	A	B	B	B	A
GM05:41912731	A	B	B	A	A	A	A	A	B	B	B	A	B	B	B	A	B	B	B	A	B	B	B	A	A	B	A	A	B	B	A	A	A	B	B	B	A	A	A	X	A	A	B	A	A	B	B	A	A
GM05:41917300	X	B	B	A	A	A	A	A	B	B	B	A	B	B	B	A	B	B	B	A	B	X	B	A	A	B	A	A	B	B	A	A	A	B	B	B	A	A	A	X	A	A	B	A	A	B	B	A	A
GM05:41974609	A	B	B	B	A	A	A	A	B	B	B	A	B	B	B	A	B	B	B	A	B	X	B	A	A	B	A	A	B	B	A	A	A	B	B	B	A	A	A	X	A	A	B	A	A	B	B	X	A
GM05:42019745	A	B	B	X	A	A	A	A	B	B	B	A	B	B	B	X	B	B	B	A	B	X	B	B	A	B	A	A	B	B	A	A	A	B	B	B	A	A	B	B	B	A	B	A	A	B	B	B	A
GM06:40180	A	A	A	B	B	B	A	A	B	A	B	A	B	A	A	A	A	A	B	B	A	B	A	B	B	A	A	B	A	A	B	A	B	A	A	X	A	A	A	A	A	A	B	A	B	B	B	A	B
GM06:48114	A	A	A	B	B	B	A	A	B	A	B	A	B	A	A	A	A	A	B	B	A	B	A	B	B	A	A	B	A	A	B	A	B	A	A	X	A	A	A	A	A	A	B	A	B	B	B	A	B
GM06:105140	A	A	A	B	B	B	A	A	B	A	B	A	B	X	A	A	A	A	B	B	A	B	A	B	B	A	A	B	A	A	B	A	B	A	A	X	A	A	A	A	A	A	B	A	B	B	B	A	B
GM06:398493	A	A	A	B	B	B	A	A	B	A	B	A	B	X	A	A	A	A	B	B	A	B	A	B	B	A	A	B	B	A	B	A	B	A	A	X	A	A	A	A	A	A	B	A	B	B	B	A	B
GM06:414408	A	A	A	B	B	B	A	A	B	A	B	A	B	X	A	A	A	A	B	B	A	B	A	B	B	A	A	B	A	A	B	A	B	A	A	X	A	A	A	A	A	A	B	A	B	B	B	A	B
GM06:479962	A	A	A	B	B	B	A	A	B	A	B	A	B	X	A	A	A	A	B	B	A	B	A	B	A	A	A	B	A	A	B	A	B	A	A	A	A	A	A	A	A	A	B	A	B	B	B	A	B
GM06:798928	A	A	A	B	B	B	A	A	B	A	B	A	B	X	A	A	A	A	B	B	A	B	A	B	B	A	A	B	A	A	B	A	B	A	A	A	A	A	A	A	A	A	B	A	B	B	B	A	B
GM06:801649	A	A	A	B	B	B	A	A	B	A	B	A	X	X	A	A	A	A	B	B	B	B	A	B	A	A	A	B	A	A	B	A	B	A	A	A	A	A	A	A	A	A	B	A	B	B	B	A	B
GM06:823092	A	A	A	B	B	B	A	A	B	A	B	A	B	B	A	A	A	A	B	B	B	B	A	B	B	A	A	B	A	A	B	A	B	A	A	A	A	A	A	A	A	A	B	A	B	B	B	A	B
GM06:830943	A	A	A	B	B	B	A	A	B	A	B	A	B	B	A	A	A	A	B	B	B	B	A	B	A	A	A	B	A	A	B	A	B	A	A	A	A	A	A	A	A	A	B	A	B	B	B	A	B
GM06:836413	A	A	A	B	B	B	A	A	B	A	B	A	B	B	A	A	A	A	B	B	B	B	A	B	A	A	A	B	A	A	B	A	B	A	A	A	A	A	A	A	A	A	B	A	B	B	B	A	B
GM06:900108	A	A	A	B	B	B	A	A	B	A	B	A	B	B	A	A	A	A	B	B	B	B	A	B	B	A	A	B	A	A	B	A	B	A	A	A	A	A	A	A	A	A	B	A	B	B	B	A	B
GM06:958814	A	A	A	B	B	B	A	A	B	A	B	A	B	B	A	A	A	A	B	B	B	B	A	B	B	A	A	B	A	A	B	A	B	A	A	A	A	A	A	A	A	A	B	A	B	B	B	A	B
GM06:976981	A	A	A	B	B	B	A	A	B	A	B	A	B	B	A	A	A	B	B	B	B	B	A	B	B	A	A	B	A	A	B	A	B	A	A	A	A	A	A	A	A	A	B	A	B	B	B	A	B
GM06:1026758	A	A	A	B	B	B	A	A	B	A	B	A	B	B	A	A	A	A	B	B	B	B	A	B	B	A	A	B	A	A	B	A	B	A	A	A	A	A	A	A	A	A	B	A	B	B	B	A	B
GM06:1119971	A	A	A	B	B	B	A	A	B	A	B	A	B	B	A	X	A	A	B	B	B	B	A	B	B	A	A	B	A	A	B	A	B	A	A	X	A	A	A	A	A	A	B	A	B	B	B	A	B
GM06:1130812	A	A	A	B	B	B	A	A	B	A	B	A	B	B	A	X	A	A	B	B	A	B	A	B	B	A	A	B	A	A	B	A	B	A	A	B	A	A	A	A	A	A	B	A	B	B	B	A	A
GM06:1142734	A	A	A	B	B	B	A	A	B	A	B	A	B	B	A	A	A	A	B	B	A	B	A	B	B	A	A	B	A	A	B	A	B	A	A	A	A	A	A	A	A	A	B	A	B	B	B	A	B
GM06:1197158	A	A	A	B	B	B	A	A	A	A	B	A	B	B	A	A	A	A	B	B	X	B	A	B	B	A	A	B	A	A	B	A	B	A	A	A	A	A	A	A	A	A	B	A	B	B	B	A	X
GM06:1798216	A	A	A	B	B	B	A	A	A	A	B	A	B	B	A	A	A	A	B	B	B	B	A	B	B	A	A	B	A	A	B	A	B	A	A	A	A	A	A	A	A	A	B	A	B	B	B	A	B
GM06:1822142	A	A	A	B	B	B	A	A	A	A	B	A	B	B	A	A	A	A	B	B	A	B	A	B	B	A	A	B	A	A	B	A	B	A	A	A	A	A	A	A	A	A	B	A	B	B	B	A	B
GM06:1923073	A	A	A	B	B	B	A	A	A	A	B	A	B	A	A	A	A	A	B	B	X	B	A	B	B	A	A	B	A	A	B	A	B	A	A	A	A	A	A	A	A	A	B	A	B	B	B	A	X
GM06:2114028	A	A	A	B	B	B	A	A	A	A	B	A	B	A	A	A	A	A	B	B	X	B	A	B	B	A	A	B	A	A	B	A	B	A	A	A	A	A	A	A	A	A	B	A	B	B	B	A	X
GM06:2114052	A	A	A	B	B	B	A	A	A	A	B	A	B	A	A	A	A	A	B	B	B	B	A	B	B	A	A	B	A	A	B	A	B	A	A	A	A	A	A	A	A	A	B	A	B	B	B	A	X
GM06:2114648	A	A	A	B	A	B	A	A	A	A	B	A	B	A	A	A	A	A	B	B	B	B	A	B	B	A	A	B	A	A	B	A	B	A	A	A	A	A	A	A	A	A	B	A	B	B	B	A	B
GM06:2367611	A	A	A	B	A	B	A	A	A	A	B	A	B	A	A	A	A	A	B	B	X	B	A	B	B	A	A	B	A	A	B	A	B	A	A	A	A	A	A	A	A	A	B	A	B	B	B	A	X
GM06:2394119	A	A	A	B	A	B	A	A	A	A	B	A	B	A	A	A	A	A	B	B	X	B	A	B	B	A	A	B	A	A	B	A	B	A	A	A	A	A	A	A	A	A	B	A	B	B	B	A	X
GM06:2455167	A	A	A	B	A	B	A	A	A	A	B	A	B	A	A	A	A	A	B	B	B	B	A	B	X	A	A	B	A	A	B	A	B	A	A	A	A	A	A	A	A	A	B	A	B	B	B	A	B
GM06:2460152	X	A	A	B	A	B	A	A	A	A	B	A	B	A	A	A	A	A	B	B	B	B	A	B	A	A	A	B	A	A	B	A	B	A	A	A	A	A	A	A	A	A	B	A	B	B	B	A	A
GM06:3151586	A	A	A	B	A	B	A	A	A	A	B	A	B	A	A	A	A	A	B	B	B	B	A	B	X	A	A	B	A	A	B	A	B	A	A	A	A	A	A	X	A	A	B	A	B	B	B	A	X
GM06:3234632	A	A	A	B	A	B	A	A	A	A	B	A	B	A	A	A	A	A	B	B	B	B	A	B	X	A	A	B	A	A	B	A	B	A	A	A	A	A	A	B	A	A	B	A	B	B	B	A	X
GM06:3326615	A	A	A	B	A	B	A	A	A	A	B	A	B	A	A	A	A	A	B	B	B	B	A	B	X	A	A	B	A	A	B	A	B	A	A	A	A	A	A	B	A	A	B	A	B	B	B	A	X
GM06:3364647	A	A	A	B	A	B	A	A	A	A	B	A	B	A	A	A	A	A	B	B	B	B	A	B	X	A	A	B	A	A	B	A	B	A	A	A	A	A	A	B	A	A	B	A	B	B	B	A	A
GM06:3417532	A	A	A	B	A	B	A	A	A	A	B	A	B	A	A	A	B	A	B	B	B	B	A	B	B	A	A	B	A	A	B	A	B	A	A	A	A	A	A	B	A	A	B	A	B	B	B	A	B
GM06:3512444	A	B	A	B	B	B	A	A	A	A	B	A	B	X	A	A	B	A	B	B	B	B	A	B	A	A	A	B	A	A	B	A	B	A	A	A	A	A	A	B	A	A	B	A	B	B	B	A	X
GM06:3526516	A	B	A	B	B	B	A	A	A	A	B	A	B	A	A	A	B	A	B	B	B	B	A	B	A	A	A	B	A	A	B	A	B	A	A	A	A	A	A	B	A	A	B	A	B	B	B	A	X
GM06:3546462	A	B	A	B	B	B	A	A	A	A	B	A	B	X	A	A	B	A	B	B	B	B	A	B	A	A	A	B	A	A	B	A	B	A	A	A	A	A	A	B	A	A	B	A	B	B	B	A	X
GM06:3997539	A	B	A	B	B	B	A	A	A	A	B	B	B	B	A	A	B	A	B	B	B	B	A	B	A	A	A	B	A	A	B	A	B	B	A	A	A	A	A	B	A	A	B	B	B	B	B	A	B
GM06:4128996	A	B	A	B	B	B	A	A	A	A	B	B	B	B	A	A	B	A	B	A	B	B	A	B	A	A	A	B	A	A	B	A	B	X	A	A	A	A	A	B	A	A	B	B	B	B	B	A	B
GM06:4150660	A	B	A	B	B	B	A	A	A	A	B	B	B	X	A	A	B	A	B	B	B	B	A	B	A	A	A	B	A	A	B	A	B	X	A	A	A	A	A	B	A	A	B	B	B	B	B	A	B
GM06:4345820	A	B	A	B	B	B	A	A	A	A	B	B	B	B	A	A	B	A	B	B	B	B	A	B	A	A	A	B	A	A	B	A	B	X	A	A	A	A	A	B	A	A	B	B	B	B	B	A	X
GM06:7333692	B	B	A	B	B	B	A	B	A	A	B	B	B	A	B	B	B	A	A	B	B	B	B	B	A	B	B	B	A	A	B	A	B	B	A	A	B	B	A	B	A	A	A	B	B	B	B	A	B
GM06:7529229	B	B	B	B	B	B	A	B	A	A	B	B	B	A	B	B	B	A	A	B	B	B	B	B	A	B	B	B	A	A	B	A	B	B	A	A	B	B	A	B	A	A	A	B	B	B	B	A	B
GM06:7537508	B	B	A	B	B	B	A	B	A	A	B	B	B	A	B	B	B	A	A	B	B	B	B	B	A	B	B	B	A	A	B	A	B	B	A	A	B	B	A	B	A	A	A	B	B	B	B	A	B
GM06:7619096	B	B	B	B	B	B	A	B	A	A	B	B	B	A	B	B	B	A	A	B	B	B	B	B	A	B	B	B	A	A	B	A	B	B	A	A	B	B	A	B	A	A	A	B	B	B	B	A	B
GM06:7701583	B	B	A	B	B	B	A	B	A	A	B	B	B	A	B	B	B	A	A	B	B	A	B	B	A	X	B	B	A	A	B	A	B	B	A	A	B	B	A	B	A	A	X	B	B	B	B	A	B
GM06:8311046	B	B	X	B	B	B	A	B	A	A	B	B	B	A	B	B	B	A	A	A	B	A	B	B	A	A	B	B	A	A	B	A	B	B	A	A	B	B	A	B	A	A	A	X	B	B	B	A	B
GM06:9023253	B	B	X	A	A	B	B	B	A	A	B	B	B	A	B	B	A	A	A	A	B	A	B	B	A	A	B	B	A	A	X	A	B	A	A	B	B	B	A	B	A	A	A	A	B	B	B	A	B
GM06:9127228	B	B	X	A	A	B	B	B	A	A	B	B	B	A	B	B	A	A	A	A	B	A	B	B	A	A	B	B	A	A	X	A	B	A	A	B	B	B	A	B	A	A	X	A	B	B	B	A	B
GM06:9412273	B	B	X	A	A	B	B	B	A	A	B	B	B	A	B	B	A	A	A	A	B	A	B	B	A	A	B	B	X	A	B	A	B	A	A	B	B	B	A	B	A	A	A	A	B	B	B	A	B
GM06:9446570	B	B	X	A	A	B	B	B	A	A	B	B	B	A	B	B	A	A	A	A	B	X	B	B	A	B	B	B	X	A	B	A	B	A	A	B	B	B	A	B	A	A	A	A	B	B	B	A	B
GM06:13440263	A	B	X	A	B	A	A	B	X	B	B	A	A	B	A	B	A	A	B	A	A	A	B	A	B	B	A	B	A	X	B	A	B	B	B	A	A	X	B	A	A	A	A	B	A	A	A	A	A
GM06:14118635	B	A	X	B	A	B	A	A	A	A	A	B	B	A	B	A	A	B	A	B	B	B	A	B	A	A	X	B	B	B	A	B	A	A	B	B	A	A	A	B	B	B	B	A	B	B	B	B	B
GM06:14118667	B	A	X	B	A	B	A	A	A	A	A	B	B	A	B	A	A	B	A	B	B	B	A	B	A	A	B	B	B	B	A	B	A	A	B	B	A	A	A	B	B	B	B	A	B	B	B	B	B
GM06:14145180	B	A	A	B	A	B	A	A	A	A	A	B	B	A	B	A	A	B	A	B	B	B	A	B	A	A	X	B	B	B	A	B	A	A	B	B	A	A	A	B	B	B	B	A	B	B	B	B	B
GM06:14155713	B	A	A	B	A	B	A	A	A	A	A	B	B	A	B	A	A	B	A	B	B	B	A	B	A	A	B	B	B	B	A	B	A	A	B	X	A	A	A	B	B	B	B	A	B	B	X	B	B
GM06:14303423	B	A	A	B	A	B	A	A	A	A	X	B	B	A	B	A	A	B	A	A	B	B	A	B	A	A	B	B	B	B	A	B	A	A	B	B	A	A	A	B	B	B	B	A	B	B	B	B	B
GM06:14369122	A	A	A	B	A	B	A	A	X	A	A	B	B	A	B	B	A	B	A	B	B	B	A	B	A	A	B	B	B	B	A	B	A	A	B	B	A	A	A	B	B	B	B	A	B	B	B	B	B
GM06:14549653	A	A	A	B	B	B	A	A	B	A	A	B	B	A	B	B	B	B	A	B	B	B	A	B	B	A	B	B	B	A	A	B	B	A	B	X	A	A	A	B	B	B	B	A	B	B	X	B	B
GM06:14550653	A	A	A	B	B	B	A	A	B	A	X	B	B	A	B	B	B	B	A	B	B	B	A	B	B	A	B	B	B	A	A	B	B	A	B	B	A	A	A	B	B	B	B	A	B	B	B	B	B
GM06:14606256	A	A	A	B	B	B	A	A	B	A	X	B	B	A	B	B	B	B	A	B	B	B	A	B	B	A	B	B	B	A	A	B	A	A	B	B	A	A	A	B	B	B	B	A	B	B	B	B	B
GM06:14645419	A	A	A	B	B	B	A	A	B	A	A	B	B	A	B	B	B	B	A	B	B	B	A	B	B	A	B	B	B	A	A	B	B	A	B	B	A	A	X	B	B	B	B	A	B	B	B	B	B
GM06:14704930	A	A	A	B	B	B	A	A	X	A	X	B	B	A	B	X	B	B	A	B	B	B	A	B	B	A	B	B	B	A	A	B	A	A	B	B	A	A	B	B	B	B	B	A	B	B	B	B	B
GM06:14712219	A	A	A	B	B	B	A	A	X	A	X	B	B	A	B	B	B	B	A	B	B	B	A	B	B	A	B	B	B	A	A	B	B	A	B	B	A	A	X	B	B	B	B	A	B	B	B	B	B
GM06:14723165	A	A	A	B	B	B	A	A	A	A	A	B	B	A	B	A	B	B	A	B	B	B	A	B	B	A	X	B	X	A	A	B	A	A	B	B	A	A	X	B	B	B	B	A	B	B	B	B	B
GM06:14823341	A	A	A	A	B	B	A	A	X	A	X	B	B	A	B	B	B	B	A	B	B	B	A	B	B	A	B	B	B	A	A	B	X	A	B	B	A	A	A	B	B	B	B	A	B	B	B	B	B
GM06:14842975	A	A	A	A	B	B	A	A	A	A	A	B	B	A	B	B	B	B	A	B	B	B	A	B	B	A	B	B	B	A	A	B	B	A	B	B	A	A	A	B	B	B	B	A	B	B	B	B	B
GM06:14843066	A	A	A	A	B	B	A	A	A	A	A	B	B	A	B	B	B	B	A	B	B	B	A	B	B	A	X	B	B	A	A	B	B	A	B	B	A	A	A	B	B	B	B	A	B	B	B	B	B
GM06:14871473	A	A	A	A	B	B	A	A	X	A	A	B	B	A	B	B	B	B	A	B	B	B	A	B	B	A	B	B	B	A	A	B	B	A	B	B	A	A	A	B	B	B	B	A	B	B	B	B	B
GM06:14883459	A	X	A	A	B	B	A	A	X	A	X	B	B	A	B	B	B	B	A	B	B	B	A	B	B	A	X	B	B	A	A	B	A	A	B	B	A	A	A	B	B	B	B	A	B	B	B	B	B
GM06:14901606	A	A	A	A	B	B	A	A	A	A	A	B	B	A	B	A	B	B	A	B	B	B	A	B	B	A	A	B	B	A	A	B	B	A	B	B	A	A	A	B	B	B	B	A	B	B	B	B	B
GM06:14987476	A	A	A	A	B	B	A	A	A	A	A	B	B	A	B	X	B	B	A	B	B	B	A	B	B	A	A	B	B	A	A	B	B	A	B	B	A	A	A	B	B	B	B	A	B	B	B	B	B
GM06:15271680	A	A	A	A	B	B	A	A	A	A	A	B	B	A	B	B	B	B	A	B	B	B	A	B	B	A	B	B	B	A	A	B	B	A	B	B	A	A	A	B	B	B	B	A	B	B	B	B	B
GM06:15360572	A	A	A	A	B	B	A	A	A	A	A	B	B	A	B	A	B	B	A	B	B	B	A	B	B	A	A	B	B	A	A	B	B	A	B	B	A	A	A	B	B	B	B	A	B	B	B	B	B
GM06:15504467	A	A	A	A	B	B	A	A	A	A	X	B	B	A	B	A	B	B	A	B	B	B	A	B	B	A	A	B	B	A	A	B	B	A	B	B	A	A	A	B	B	B	B	A	B	B	B	B	B
GM06:15701196	A	A	A	A	X	B	A	A	A	A	B	B	B	A	B	B	B	B	A	B	B	B	A	B	B	A	X	B	B	A	A	B	B	A	X	B	B	A	A	B	B	B	B	A	B	B	B	B	B
GM06:16063060	A	A	A	A	X	B	A	B	A	A	B	A	B	A	B	B	B	B	A	B	B	B	X	B	B	A	A	B	B	A	A	B	B	A	A	B	A	B	A	A	B	B	B	A	B	B	B	B	B
GM06:16065673	A	A	A	A	X	B	A	B	A	A	B	A	B	A	B	A	B	B	A	B	B	B	X	B	B	B	A	B	B	A	A	B	B	A	A	B	A	B	A	A	B	B	B	A	B	B	B	B	B
GM06:16065701	A	A	A	A	X	B	A	B	A	A	B	A	B	A	B	A	B	B	A	B	B	B	X	B	B	A	A	B	B	A	A	B	B	A	A	B	A	B	A	A	B	B	B	A	B	B	B	B	B
GM06:16114359	A	A	A	A	X	B	A	B	A	A	B	A	B	A	B	X	B	B	A	B	B	B	X	B	B	B	A	B	B	A	A	B	B	A	A	B	A	B	A	A	B	B	B	A	B	B	B	X	B
GM06:16127970	A	A	A	A	X	B	A	B	A	A	B	A	B	A	B	X	B	B	A	B	B	B	A	B	B	B	A	B	B	A	A	B	B	A	A	B	A	B	A	A	B	B	B	A	B	B	B	B	B
GM06:16192915	A	A	A	A	B	B	A	B	A	A	B	A	B	A	B	X	B	B	A	B	B	B	X	B	B	B	A	B	B	A	B	B	B	A	A	B	A	B	X	B	B	B	B	A	B	B	B	B	B
GM06:16204069	A	A	A	A	B	B	A	B	A	A	B	A	B	A	B	A	B	B	A	B	B	B	A	B	B	B	A	B	B	A	A	B	B	A	A	B	A	B	A	A	B	B	B	A	B	B	B	B	B
GM06:16257054	A	A	A	A	B	B	A	B	A	A	B	A	B	A	B	B	B	B	A	B	B	B	A	B	B	B	A	B	B	A	X	B	B	A	A	B	A	B	A	A	B	B	B	A	B	B	B	B	B
GM06:16389696	A	A	A	A	B	B	A	B	A	A	B	A	B	A	B	B	B	B	A	B	B	B	A	B	B	B	A	B	B	A	X	B	B	A	A	B	A	B	A	A	B	B	B	A	B	B	B	B	B
GM06:16506243	A	A	A	A	B	B	A	B	A	A	B	A	B	A	B	B	B	B	A	B	B	B	A	B	B	B	A	B	B	A	B	B	B	A	A	B	A	B	X	A	B	B	B	A	B	B	B	B	B
GM06:16674718	A	A	A	A	B	B	A	B	A	A	B	A	B	A	B	B	B	B	A	B	B	B	A	B	B	B	A	B	B	A	X	B	B	A	A	B	A	B	X	A	B	B	B	A	B	B	B	B	B
GM06:17513519	A	A	A	A	X	B	A	B	A	A	B	A	B	A	X	B	B	B	A	B	B	B	X	B	B	B	A	B	B	A	X	B	B	A	A	B	A	B	B	A	B	B	B	A	B	B	B	B	B
GM06:17747546	A	A	A	A	B	B	B	B	A	A	B	A	B	A	B	B	B	B	A	B	B	B	B	B	B	B	A	B	B	A	B	B	B	A	B	B	A	B	B	A	B	B	B	A	B	B	B	B	B
GM06:17830223	A	A	A	A	B	B	B	B	A	A	B	A	B	A	B	B	B	B	A	B	B	B	B	B	B	B	A	B	B	A	B	B	B	A	B	B	A	B	B	A	B	B	B	A	B	B	B	B	B
GM06:18262309	A	A	A	A	B	B	B	B	A	A	B	A	B	A	B	B	B	B	A	B	B	B	X	B	B	B	A	B	B	A	B	B	B	A	X	B	A	B	B	A	B	B	B	A	B	B	B	B	B
GM06:18591894	A	A	A	A	B	B	B	B	A	A	B	A	B	A	B	B	B	B	A	B	B	B	B	B	B	B	A	B	B	A	B	B	B	A	B	B	A	B	X	A	B	B	B	A	B	B	B	B	B
GM06:18597044	A	A	X	A	X	B	B	B	A	A	B	A	B	A	X	B	B	B	A	B	B	B	A	B	B	B	A	B	B	X	X	B	B	A	A	B	A	B	X	A	B	B	B	A	B	B	B	B	B
GM06:18664316	A	A	A	A	A	B	B	B	A	A	B	A	B	A	B	B	B	B	A	B	B	B	A	B	B	B	A	B	B	X	X	B	B	A	B	B	A	B	B	A	B	B	B	A	B	B	B	B	B
GM06:18664490	A	A	A	A	B	B	B	B	X	A	B	A	B	A	A	B	B	B	A	B	B	B	X	B	B	B	A	B	B	A	A	B	B	A	A	B	A	B	B	A	B	B	B	A	B	B	B	B	B
GM06:18664592	A	A	A	A	X	B	B	B	A	A	B	A	B	A	B	B	B	B	A	B	B	B	A	B	B	B	A	B	B	A	X	B	B	A	A	B	A	B	B	A	B	B	B	A	B	B	B	B	B
GM06:18808645	A	A	X	A	B	B	B	B	A	A	B	A	B	A	B	B	B	B	A	B	B	B	B	B	B	B	A	B	B	X	B	B	B	A	B	B	A	B	B	A	B	B	B	A	B	B	B	B	B
GM06:18844283	A	A	A	A	B	B	B	B	A	A	B	A	B	A	A	B	B	B	A	B	B	B	B	B	B	B	A	B	B	A	B	B	B	A	B	B	A	B	B	A	B	B	B	A	B	B	B	B	B
GM06:18911805	A	A	A	A	A	B	B	B	A	A	B	A	B	A	B	B	B	B	A	B	B	B	B	B	B	B	A	B	B	A	X	B	B	A	B	B	A	B	B	A	B	B	B	A	B	B	B	B	B
GM06:19310425	A	A	A	A	B	B	B	B	A	A	B	A	B	A	A	B	B	B	A	B	B	B	A	B	B	B	A	B	B	A	B	B	B	A	X	B	A	B	X	A	B	B	B	A	B	B	B	B	B
GM06:19434868	A	A	X	A	A	B	B	B	A	A	B	A	B	A	X	B	B	B	A	B	B	B	B	B	B	B	A	B	B	A	A	B	B	A	B	B	A	B	B	A	B	B	B	A	B	B	B	B	B
GM06:19461588	A	A	X	A	B	B	B	B	A	A	B	A	B	A	X	B	B	B	A	B	B	B	B	B	B	B	A	B	B	A	A	B	B	A	B	B	A	B	B	A	B	B	B	A	B	B	B	B	B
GM06:19560400	A	A	X	A	A	B	B	B	A	A	B	A	B	A	B	B	B	B	A	B	B	B	B	B	B	B	A	B	B	A	X	B	B	A	B	B	A	B	B	A	B	B	B	A	B	B	B	B	B
GM06:19790867	A	A	B	A	A	B	B	B	A	A	B	A	B	A	X	B	B	B	A	B	B	B	B	B	B	B	A	B	B	A	A	B	B	A	B	B	A	B	B	A	B	B	B	A	B	B	B	B	B
GM06:20140488	A	A	B	A	B	B	B	B	A	A	B	A	B	A	B	B	B	B	A	B	B	B	B	B	B	B	A	B	B	A	B	B	B	A	B	B	A	B	B	A	B	B	B	A	B	B	B	B	B
GM06:23865321	A	A	X	A	A	B	B	B	A	A	B	A	B	A	X	B	B	B	A	B	B	B	B	B	B	B	A	B	B	A	B	B	B	A	B	B	A	B	A	A	B	B	B	A	B	B	B	B	B
GM06:24406768	A	A	X	A	A	B	B	B	A	A	B	A	B	A	X	B	B	B	A	B	B	B	B	B	B	B	A	B	B	A	B	B	B	A	B	B	A	B	B	A	B	B	B	A	B	B	B	B	B
GM06:26208437	A	A	B	A	X	B	B	B	A	A	B	A	B	A	B	B	B	B	A	B	B	B	A	B	B	B	A	B	B	A	B	B	B	A	B	B	A	B	B	A	B	B	B	A	B	B	B	B	B
GM06:29867092	A	A	X	A	A	B	B	B	A	A	B	A	B	A	X	B	B	B	A	B	B	B	B	A	B	B	A	B	B	A	X	B	B	A	B	B	A	B	B	A	B	B	B	A	B	B	B	B	B
GM06:29918857	A	A	B	A	B	B	B	B	A	A	B	A	B	A	B	B	B	B	A	B	B	B	B	B	B	B	A	B	B	X	X	B	B	A	B	B	A	B	B	A	B	B	B	A	B	B	B	B	B
GM06:29932654	A	A	B	A	B	B	B	B	A	A	B	A	B	A	B	B	B	B	A	B	B	B	B	B	B	B	A	B	B	A	B	B	B	A	B	B	A	B	B	A	B	B	B	A	B	B	B	B	B
GM06:29939507	A	A	X	A	B	B	B	B	A	A	B	A	B	A	B	B	B	B	A	B	B	B	B	B	B	B	A	B	B	A	B	B	B	A	B	B	A	B	B	A	B	B	B	A	B	B	B	B	B
GM06:30024246	A	A	X	A	B	B	B	B	A	A	B	A	B	A	B	B	B	B	A	B	B	B	B	B	B	B	A	B	B	A	B	B	B	A	B	B	A	B	B	A	B	B	B	A	B	B	B	B	B
GM06:30104091	A	A	X	A	A	B	B	B	A	A	B	A	B	A	A	B	B	X	A	B	B	B	X	B	B	B	A	B	B	X	B	B	B	A	X	B	A	B	B	A	B	B	B	A	B	B	B	B	B
GM06:30535371	A	A	A	A	X	B	B	B	A	A	B	A	B	A	B	B	B	B	A	B	B	B	B	B	B	B	A	B	B	A	B	B	B	A	B	B	A	B	B	A	B	B	B	A	B	B	B	B	B
GM06:30705639	A	A	X	A	X	B	B	B	A	A	B	A	B	A	B	B	B	A	A	B	B	B	B	B	B	B	A	B	B	A	X	B	B	A	B	B	A	B	X	B	B	B	B	A	B	B	B	B	B
GM06:30939746	A	A	B	A	A	B	B	B	A	A	B	A	B	A	B	B	B	B	A	B	B	B	B	A	B	B	A	B	B	X	B	B	B	A	B	B	A	B	B	A	B	B	B	X	B	B	B	B	B
GM06:30986391	A	A	X	A	X	B	B	B	A	A	B	A	B	A	X	B	B	X	A	B	B	B	B	A	B	B	A	B	B	X	B	B	B	A	B	B	A	B	B	A	B	B	B	A	B	B	B	B	B
GM06:32980358	A	A	B	A	A	B	B	B	A	A	B	A	B	A	X	B	B	B	A	B	B	B	B	A	B	B	A	B	B	A	B	B	B	A	B	B	A	B	B	B	B	B	B	A	B	B	B	B	B
GM06:33186619	A	A	X	A	A	B	B	B	A	A	B	A	B	A	A	B	B	B	A	B	B	B	B	A	B	B	A	B	B	A	B	B	B	A	X	B	A	B	B	B	B	B	B	A	B	B	B	B	B
GM06:33589888	A	A	X	A	B	B	B	B	A	A	B	A	B	A	B	B	B	B	A	B	B	B	B	X	B	B	A	B	B	A	B	B	B	A	B	B	A	B	B	B	B	B	B	A	B	B	B	B	B
GM06:33594350	A	A	A	A	A	B	B	B	A	A	B	A	B	A	A	B	B	B	A	B	B	B	B	A	B	B	A	B	B	A	B	B	B	A	X	B	A	B	B	B	B	B	B	A	B	B	B	B	B
GM06:33625043	A	A	X	A	B	B	B	B	A	A	B	A	B	A	X	B	B	B	A	B	B	B	B	X	B	B	A	B	B	A	B	B	B	A	A	B	A	B	A	B	B	B	B	A	B	B	B	B	B
GM06:33648301	A	A	B	A	B	B	B	B	A	A	B	A	B	A	B	B	B	B	A	B	B	B	B	X	B	B	A	B	B	A	B	B	B	A	B	B	A	B	B	B	B	B	B	A	B	B	B	B	B
GM06:34515484	A	A	B	A	A	B	B	B	A	A	B	A	B	A	X	B	B	B	A	B	B	B	A	A	B	B	A	B	B	A	B	B	B	A	B	B	A	B	B	B	B	B	B	A	B	B	B	B	B
GM06:34724817	A	A	B	A	B	B	B	B	A	A	B	A	B	A	B	B	B	B	A	B	B	B	B	X	B	B	A	B	B	A	B	B	B	A	B	B	A	B	B	B	B	B	B	A	B	B	B	B	B
GM06:34964270	A	A	B	A	B	B	B	B	A	A	B	A	B	A	B	B	B	B	A	B	B	B	B	X	B	B	A	B	B	A	B	B	B	A	B	B	A	B	B	B	B	B	B	A	B	B	B	B	B
GM06:34969067	A	A	X	A	B	B	B	B	A	A	B	A	B	A	A	B	B	B	A	B	B	B	B	A	B	B	A	B	B	A	B	B	B	A	B	B	A	B	B	B	B	B	B	A	B	B	B	B	B
GM06:34971373	A	A	A	A	B	B	B	B	A	A	B	A	B	A	A	B	B	B	A	B	B	B	B	A	B	B	A	B	B	A	B	B	B	A	A	B	A	B	A	B	B	B	B	A	B	B	B	B	B
GM06:35015776	A	A	A	A	B	B	B	B	A	A	B	A	B	A	A	B	B	B	A	B	B	B	B	A	B	B	A	B	B	A	B	B	B	A	A	B	A	B	B	B	B	B	B	A	B	B	B	B	B
GM06:35016730	A	A	B	A	B	B	B	B	A	A	B	A	B	A	B	B	B	B	A	B	B	B	B	A	B	B	A	B	B	A	B	B	B	A	B	B	A	B	B	B	B	B	B	A	B	B	B	B	B
GM06:35134136	A	A	A	A	B	B	B	B	A	A	B	A	B	A	B	B	B	B	A	B	B	B	B	B	B	B	A	B	B	A	B	B	B	A	A	B	A	B	B	B	B	B	B	A	B	B	B	B	B
GM06:35155072	A	A	A	A	B	B	B	B	A	A	B	A	B	A	B	B	B	B	A	B	B	B	B	A	B	B	A	B	B	A	B	B	B	A	A	B	A	B	B	B	B	B	B	A	B	B	B	B	B
GM06:35172789	A	A	A	A	B	B	B	B	A	A	B	A	B	A	B	B	B	B	A	B	B	B	B	A	B	B	A	B	B	A	B	B	B	A	A	B	A	B	B	B	B	B	B	A	B	B	B	B	B
GM06:35353033	A	A	X	A	B	B	B	B	A	A	B	A	B	A	B	B	B	B	A	B	B	B	B	A	B	B	A	B	B	X	B	B	B	A	A	B	A	B	B	B	B	B	B	A	B	B	B	B	B
GM06:35361851	A	A	B	A	X	B	B	B	A	A	B	A	B	A	X	B	B	B	A	B	B	B	B	A	B	B	A	B	B	X	B	B	B	A	A	B	A	B	A	B	B	B	B	A	B	B	B	B	B
GM06:35361867	A	A	B	A	X	B	B	B	A	A	B	A	B	A	X	B	B	B	A	B	B	B	B	A	B	B	A	B	B	X	B	B	B	A	A	B	A	B	A	B	B	B	B	A	B	B	B	B	B
GM06:35621230	A	A	B	A	B	B	B	B	A	A	B	A	B	A	B	B	B	B	A	B	B	B	B	A	B	B	A	B	B	A	B	B	B	A	B	B	A	B	B	B	B	B	B	A	B	B	B	B	B
GM06:35745693	A	A	X	A	X	B	B	B	A	A	B	A	B	A	A	B	B	A	A	B	B	B	B	A	B	B	A	B	B	A	X	B	B	A	A	B	A	B	B	B	B	B	B	A	B	B	B	B	B
GM06:35953843	A	A	X	A	X	B	B	B	A	A	B	A	B	A	B	B	B	A	A	B	B	B	B	A	B	B	A	B	B	B	X	B	B	A	A	B	A	B	B	B	B	B	B	A	B	B	B	B	B
GM06:36770958	A	A	A	A	B	B	B	B	A	A	B	A	B	A	B	B	B	B	A	B	B	B	B	A	B	B	A	A	B	A	A	B	B	A	X	B	A	B	B	B	B	B	B	A	B	B	B	B	B
GM06:36808630	A	A	X	A	B	B	B	B	A	A	B	A	B	A	B	B	B	B	A	B	B	B	B	A	B	B	A	B	B	B	B	B	B	A	B	B	A	B	B	B	B	B	B	A	B	B	B	B	B
GM06:36823371	A	A	B	A	B	B	B	B	A	A	B	A	B	A	A	B	B	B	A	B	B	B	B	A	B	B	A	B	B	A	A	B	B	A	X	B	A	B	B	B	B	B	B	A	B	B	B	B	B
GM06:36835583	A	A	A	A	A	B	B	B	A	A	B	A	B	A	A	B	B	B	A	B	B	B	B	A	B	B	A	B	B	A	A	B	B	A	A	B	A	B	B	B	B	B	B	A	B	B	B	B	B
GM06:36927012	A	A	X	A	X	B	B	B	A	A	B	A	B	A	B	B	B	B	A	B	B	B	B	A	B	B	A	B	B	A	A	B	B	A	B	B	A	B	B	A	B	B	X	A	B	B	B	B	B
GM06:37169796	A	A	B	A	B	B	B	B	A	A	B	A	B	A	B	B	B	B	A	B	B	B	B	A	B	B	A	B	B	A	B	B	B	A	B	B	A	B	B	B	B	B	B	A	B	B	B	B	B
GM06:37253284	A	A	B	A	B	B	B	B	A	A	B	A	B	A	X	B	B	B	A	B	B	B	B	A	B	B	A	B	B	X	B	B	B	A	A	B	A	B	B	A	B	B	B	A	B	B	B	B	B
GM06:38160215	A	A	B	A	X	B	B	B	A	A	B	A	B	A	A	B	B	B	A	B	B	B	B	A	B	B	A	B	B	A	B	B	B	A	A	B	A	B	B	B	B	B	B	A	B	B	B	B	B
GM06:38430279	X	A	A	A	X	B	B	B	A	A	B	A	B	A	B	B	B	B	A	B	B	B	B	A	B	B	A	B	B	A	B	B	B	A	A	B	A	B	B	B	B	B	B	A	B	B	B	B	B
GM06:38680075	A	A	X	A	X	B	B	B	A	A	B	A	B	A	B	B	B	B	A	A	B	B	B	A	B	B	A	B	B	A	A	B	B	A	A	B	A	B	B	A	B	B	B	A	B	B	B	B	X
GM06:38705390	A	A	A	A	X	B	B	B	A	A	B	A	B	A	X	B	B	B	A	B	B	B	B	A	B	B	A	B	B	A	B	B	B	A	A	B	A	B	B	B	B	B	B	A	B	B	B	B	B
GM06:38796397	A	A	A	A	X	B	B	B	A	A	B	A	B	A	A	B	B	B	A	B	B	B	A	A	B	B	A	B	B	A	A	B	B	A	A	B	A	B	B	B	B	B	B	A	B	B	B	B	A
GM06:38797433	A	A	X	A	B	B	B	B	A	A	B	A	B	A	A	B	B	B	A	B	B	B	A	A	B	B	A	B	B	A	B	B	B	A	A	B	A	B	B	B	B	B	B	A	B	B	B	B	B
GM06:38904038	A	A	B	A	X	B	B	B	A	B	B	A	B	A	X	B	B	B	A	B	B	B	B	A	B	B	A	B	B	A	B	B	B	A	B	B	A	B	B	B	B	B	B	A	B	B	B	B	X
GM06:38960003	A	A	A	A	B	B	B	B	A	A	B	A	B	A	X	B	B	B	A	B	B	B	A	X	B	B	A	B	B	A	A	B	B	A	A	B	A	B	B	B	B	B	B	A	B	B	B	B	A
GM06:39320628	A	A	B	A	A	B	B	B	A	B	B	A	B	A	B	B	B	B	A	B	B	B	B	B	B	B	A	B	B	A	B	B	B	A	B	B	A	B	B	B	B	B	B	A	B	B	B	B	B
GM06:39400187	A	A	B	A	B	B	B	B	A	B	B	A	B	A	X	B	B	B	A	B	B	B	B	B	B	B	A	B	B	A	B	B	B	A	B	B	A	B	B	B	B	B	B	A	B	B	B	B	B
GM06:39443931	A	A	B	A	B	B	B	B	A	B	B	A	B	A	B	B	B	B	A	B	B	B	B	B	B	B	A	B	B	A	B	B	B	A	B	B	A	B	B	B	B	B	B	A	B	B	B	B	B
GM06:39446506	A	A	B	A	B	B	B	B	A	B	B	A	B	A	A	B	B	B	A	B	B	B	B	B	B	B	A	B	B	A	B	B	B	A	B	B	A	B	B	B	B	B	B	A	B	B	B	B	X
GM06:39469898	A	A	B	A	B	B	B	B	A	B	B	A	B	A	B	B	B	B	A	B	B	B	B	B	B	B	A	B	B	A	B	B	B	A	A	B	A	B	B	B	B	B	B	A	B	B	B	B	X
GM06:39469947	A	A	B	A	B	B	B	B	A	B	B	A	B	A	B	B	B	B	A	B	B	B	B	B	B	B	A	B	B	A	B	B	B	A	B	B	A	B	B	B	B	B	B	A	B	B	B	B	A
GM06:39473522	A	A	A	A	X	B	B	B	A	B	B	A	B	A	X	B	B	B	A	B	B	B	B	X	B	B	A	B	B	A	B	B	B	A	X	B	A	B	B	B	B	B	B	A	B	B	B	B	A
GM06:39731826	A	A	A	A	B	B	B	B	A	X	B	A	B	A	X	B	B	B	A	B	B	B	B	B	B	B	A	B	B	A	A	B	B	A	B	B	A	B	B	B	B	B	B	A	B	B	B	B	X
GM06:40308477	A	A	B	A	B	B	B	B	A	X	B	A	B	A	B	B	B	B	A	B	B	B	B	B	B	B	A	B	B	A	B	B	B	A	X	B	A	B	B	B	B	B	B	A	B	B	B	B	A
GM06:40323479	A	A	X	A	B	B	B	B	A	X	B	A	B	A	X	B	B	B	A	B	B	B	B	B	B	B	A	B	B	A	X	B	B	A	X	B	A	B	B	B	B	B	B	A	B	B	B	B	A
GM06:40372927	A	A	A	A	B	B	B	B	A	B	B	A	B	A	A	B	B	B	A	B	B	B	B	B	B	B	A	B	B	A	X	B	B	A	X	B	A	B	B	B	B	B	B	A	B	B	B	B	B
GM06:40509386	A	A	X	A	A	B	B	B	A	B	B	A	B	A	X	B	B	B	A	B	B	B	A	B	B	B	A	B	B	A	B	B	B	A	X	B	A	B	B	B	B	B	B	A	B	B	B	B	B
GM06:40741569	A	A	X	A	B	B	B	B	A	B	B	A	B	A	B	B	B	B	A	B	B	B	B	A	B	B	A	B	B	X	B	B	B	A	B	B	A	B	B	B	B	B	B	A	B	B	B	B	B
GM06:40807988	A	A	X	A	X	B	B	B	A	B	B	A	B	A	B	B	B	B	A	B	B	B	A	A	B	B	A	B	B	A	B	B	B	A	A	B	A	B	B	B	B	B	B	A	B	B	B	B	B
GM06:40808114	A	A	X	A	B	B	B	B	A	B	B	A	B	A	B	B	B	B	A	B	B	B	B	A	B	B	A	B	B	A	B	B	B	A	A	B	A	B	B	A	B	B	B	A	B	B	B	B	B
GM06:40867414	X	A	A	A	B	B	B	B	A	X	B	A	B	A	B	B	B	B	A	B	B	B	B	A	B	B	A	B	B	A	X	B	B	A	A	B	A	B	B	B	B	B	B	A	B	B	B	B	B
GM06:41013711	A	A	X	A	A	B	B	B	A	A	B	A	B	A	A	B	B	B	A	B	B	B	A	A	B	B	A	B	B	A	A	B	B	A	A	B	A	B	B	B	B	B	B	A	B	B	B	B	B
GM06:41081848	A	A	A	A	X	B	B	B	A	B	B	A	B	A	X	B	B	B	A	B	B	B	A	A	B	B	A	B	B	A	A	B	B	A	A	B	A	B	B	B	B	B	B	A	B	B	B	B	B
GM06:41158281	A	A	X	A	B	B	B	B	A	X	B	A	B	A	B	B	B	B	A	B	B	B	B	A	B	B	A	B	B	A	A	B	B	A	A	B	A	B	B	B	B	B	B	A	B	B	B	B	A
GM06:41211012	A	A	X	A	B	B	B	B	A	A	B	A	B	A	B	B	B	B	A	B	B	B	B	A	B	B	A	B	B	A	A	B	B	A	A	B	A	B	B	B	B	B	B	A	B	B	B	B	B
GM06:41243137	A	A	B	A	B	B	B	B	A	B	B	A	B	A	B	B	B	B	A	B	B	B	B	B	B	B	A	B	B	A	B	B	B	A	B	B	A	B	B	B	B	B	B	A	B	B	B	B	A
GM06:41256365	A	A	B	A	A	B	B	B	A	B	B	A	A	A	B	B	B	B	A	B	B	B	B	B	B	B	A	B	B	A	B	B	B	A	B	B	A	B	B	B	B	B	B	A	B	B	B	B	A
GM06:41366129	A	A	X	A	B	B	B	B	A	B	B	A	B	A	X	B	B	B	A	B	B	B	B	A	B	B	A	B	A	A	B	B	B	A	B	B	A	B	B	B	B	B	B	A	B	B	B	B	A
GM06:41444315	A	A	B	A	B	B	B	B	A	X	B	A	B	A	A	B	B	B	A	B	B	B	B	A	B	B	A	B	B	A	B	B	B	A	A	B	A	B	B	B	B	B	B	A	B	B	B	B	B
GM06:41638393	A	A	X	A	X	B	B	B	A	B	B	A	B	A	A	B	B	B	A	B	B	B	B	B	B	B	A	B	B	A	A	B	B	A	A	B	A	B	X	B	B	B	B	A	B	B	B	B	A
GM06:41644253	A	A	X	A	A	B	B	B	A	B	B	A	B	A	A	B	B	B	A	B	B	B	B	B	B	B	A	B	B	A	A	B	B	A	A	B	A	B	X	B	B	B	B	A	B	B	B	B	X
GM06:41650253	A	A	X	A	A	B	B	B	A	A	B	A	B	A	A	B	B	B	A	B	B	B	B	A	B	B	A	B	B	A	A	B	B	A	A	B	A	B	X	B	B	B	B	A	B	B	B	B	A
GM06:41988029	A	A	A	A	B	B	B	B	A	A	B	A	B	A	X	B	B	B	A	B	B	B	A	A	B	B	A	B	B	A	A	B	B	A	A	B	A	B	B	B	B	B	B	A	B	B	B	B	B
GM06:43877231	A	A	X	A	B	B	B	B	A	X	B	A	B	A	B	B	B	B	A	B	B	B	B	A	B	B	A	B	B	A	B	B	B	A	A	B	A	B	B	B	B	B	B	A	B	B	B	B	B
GM06:43966841	A	A	X	A	B	B	B	B	A	A	B	A	B	A	B	B	B	B	A	B	B	B	B	A	B	B	A	B	B	A	B	B	B	A	A	B	A	B	B	B	B	B	B	A	B	B	B	B	B
GM06:44011287	A	A	X	A	B	B	B	B	A	X	B	A	B	A	B	B	B	B	A	B	B	B	B	A	B	B	A	B	B	B	B	B	B	A	A	B	A	B	B	B	B	B	B	A	B	B	B	B	B
GM06:44105589	A	A	B	A	B	B	B	B	A	X	B	A	B	A	B	B	B	B	A	B	B	B	B	A	B	B	A	B	B	A	B	B	B	A	A	B	A	B	B	B	B	B	B	A	B	B	B	B	B
GM06:44115749	A	A	B	A	X	B	B	B	A	X	B	A	B	A	B	B	B	B	A	B	B	B	B	A	B	B	A	B	B	A	B	B	B	A	A	B	A	B	B	X	B	B	B	A	B	B	B	B	B
GM06:44353358	A	A	X	A	X	B	B	B	A	X	B	A	B	A	B	B	B	B	A	B	B	B	B	A	B	B	A	B	B	A	B	B	B	A	A	B	A	B	B	A	B	B	B	A	B	B	B	B	B
GM06:44529862	A	A	B	A	X	B	B	B	A	B	B	A	B	A	B	B	B	B	A	B	B	B	B	A	B	B	A	B	B	A	B	B	B	A	A	B	A	B	B	B	B	B	B	A	B	B	B	B	B
GM06:44608116	A	A	X	A	A	B	B	B	A	B	B	A	B	A	B	B	B	B	A	B	B	B	B	A	B	B	A	B	B	A	B	B	B	A	A	B	A	B	B	A	B	B	B	A	B	B	B	B	B
GM06:45503062	A	A	A	A	B	B	B	B	A	A	B	A	B	X	B	B	B	B	A	B	B	B	B	A	B	B	A	A	B	A	X	A	B	X	A	B	A	B	B	B	B	X	B	A	B	B	B	B	A
GM06:45736576	A	A	X	A	A	B	B	B	A	A	B	A	B	B	B	B	B	B	A	B	B	B	A	A	B	B	A	B	B	A	B	A	B	B	A	B	A	B	B	B	B	X	B	A	B	B	B	B	B
GM06:45799395	A	A	X	A	X	B	B	B	A	A	B	A	B	B	B	B	B	B	A	B	B	B	A	A	B	B	A	B	B	A	B	A	B	A	A	B	A	B	B	B	B	X	B	A	B	B	B	B	A
GM06:45813342	A	A	X	A	X	B	B	B	A	A	B	A	B	B	B	B	B	B	A	B	B	B	A	A	B	B	A	B	B	A	B	A	B	X	A	B	A	B	B	B	B	X	B	A	B	B	B	B	B
GM06:46268587	A	A	X	A	X	B	B	B	A	A	B	A	B	B	B	B	B	B	A	B	B	B	A	A	B	B	A	B	B	A	B	A	B	X	A	B	A	B	B	B	B	X	B	A	B	B	B	B	B
GM06:46523023	A	A	A	A	A	B	B	B	A	A	B	A	B	B	B	B	B	B	A	B	B	B	X	A	B	B	A	B	B	A	X	A	B	A	A	X	A	B	B	B	B	A	B	A	B	B	B	B	A
GM06:46637116	A	A	A	A	X	B	B	B	A	A	B	A	B	B	B	B	B	B	A	B	B	B	X	A	B	B	A	B	B	A	X	A	B	A	A	B	A	B	B	B	B	A	B	A	B	B	B	B	B
GM06:46782577	A	A	X	A	X	B	B	B	A	A	B	A	B	B	B	B	B	B	A	B	B	B	A	A	B	B	A	B	B	A	X	A	B	A	A	B	A	B	B	B	B	A	B	A	B	B	B	B	B
GM06:46817431	A	A	B	A	B	B	B	B	A	A	B	A	B	B	B	B	X	B	A	B	B	B	A	A	B	B	A	A	B	A	X	A	B	B	A	B	A	B	B	B	B	A	B	A	B	B	B	B	A
GM06:46865268	A	A	A	A	B	B	B	B	A	A	B	A	B	B	B	B	X	B	A	B	B	B	A	A	B	B	A	B	B	A	X	A	B	X	A	B	A	B	A	B	B	A	B	A	B	B	B	B	B
GM06:46921897	A	A	A	A	B	B	B	B	A	A	B	A	B	B	B	B	X	B	A	B	B	B	A	A	B	B	A	B	B	A	A	A	B	B	A	B	A	B	B	B	B	A	B	A	B	B	B	B	X
GM06:47206215	A	A	A	A	A	B	B	B	A	A	B	A	B	B	B	B	A	B	A	B	B	B	A	A	B	B	A	B	B	A	A	A	B	X	A	B	A	B	B	B	A	A	B	A	B	B	B	B	X
GM06:47212304	X	A	X	A	A	B	B	B	A	A	B	A	B	B	B	B	A	B	A	B	B	B	A	A	B	B	A	B	B	A	A	A	B	B	A	B	A	B	B	B	X	A	B	A	B	B	B	B	B
GM06:47215668	X	A	X	A	A	B	B	B	A	A	B	A	B	B	B	B	A	B	A	B	B	B	A	A	B	B	A	B	B	A	A	A	B	X	A	B	A	B	B	B	A	A	B	A	B	B	B	B	A
GM06:47325249	A	A	X	A	A	B	B	B	A	A	B	A	B	B	B	B	A	B	A	B	B	B	A	A	B	B	A	B	B	X	A	A	B	X	A	B	A	B	B	B	A	X	B	A	B	B	B	B	X
GM06:47325325	X	A	X	A	A	B	B	B	A	A	B	A	B	B	B	B	A	B	A	B	B	B	A	A	B	B	A	B	B	A	A	A	B	X	A	B	A	B	B	B	A	X	B	A	B	B	B	B	B
GM06:47380588	A	A	X	A	A	B	B	B	A	A	B	A	X	B	B	B	A	B	A	B	B	B	A	A	B	B	A	B	B	A	A	A	B	X	A	B	A	B	B	B	A	A	B	A	B	B	B	B	B
GM06:48564474	A	A	A	A	A	A	A	A	A	A	B	A	A	B	A	A	A	B	A	B	B	B	B	A	A	B	A	B	B	B	A	A	B	B	A	B	A	A	A	B	A	A	B	A	B	B	B	B	B
GM06:48770406	A	A	B	A	A	A	A	A	A	A	B	A	A	B	A	A	A	B	A	B	B	B	B	A	A	B	A	B	B	B	A	A	B	A	A	B	A	A	A	B	A	A	B	A	B	B	B	B	B
GM06:48880091	A	A	B	A	A	A	A	A	A	A	B	A	A	B	A	A	A	B	A	B	B	B	B	A	A	B	A	B	B	B	A	A	B	A	A	X	A	A	A	B	A	A	B	A	A	B	B	B	B
GM06:48965843	A	A	B	A	A	A	A	A	A	A	B	A	X	B	A	A	A	B	A	B	B	B	B	A	B	B	A	B	B	B	B	A	B	A	A	X	A	A	A	B	B	A	B	A	X	B	B	B	B
GM06:48976326	A	A	B	B	A	A	A	A	A	A	B	A	X	B	A	A	A	B	A	B	B	B	B	A	B	B	A	B	B	B	B	A	B	A	X	X	A	A	B	B	B	A	B	A	B	B	B	B	B
GM06:49053993	A	A	X	B	A	A	A	A	A	A	B	A	B	B	A	A	A	B	A	B	B	B	B	A	A	B	A	A	B	B	B	A	B	A	A	B	A	A	B	A	A	A	B	A	X	B	A	B	B
GM06:49064036	A	A	X	A	A	A	A	A	A	A	B	A	B	B	A	A	A	B	A	B	B	B	B	A	A	B	A	A	B	B	B	A	B	A	A	B	A	A	X	B	X	A	B	A	X	B	B	B	B
GM06:49074475	A	A	B	X	A	A	A	A	A	A	B	A	B	B	A	A	A	B	A	B	B	B	B	A	A	B	A	B	B	B	B	A	B	A	A	B	A	A	A	B	A	A	B	A	X	B	A	B	B
GM06:49076415	A	A	B	B	A	A	A	A	A	A	B	A	B	B	A	A	A	B	A	B	B	B	B	A	X	B	A	B	B	B	B	A	B	A	X	B	A	A	A	B	X	A	B	A	B	B	A	B	B
GM06:49090308	A	A	X	X	A	A	A	A	A	A	B	A	B	B	A	A	A	B	A	B	B	B	B	A	A	B	A	A	B	B	B	A	B	A	A	B	A	A	A	B	A	A	B	A	A	B	A	B	B
GM06:49539947	A	A	A	X	A	A	A	A	A	A	B	A	B	B	A	B	A	B	A	B	B	B	B	A	A	B	A	A	B	B	B	A	B	A	X	B	A	A	X	B	A	A	B	A	A	B	A	B	B
GM06:49845872	A	A	X	B	A	A	A	A	A	A	B	A	B	B	A	B	A	B	A	B	B	B	B	A	A	B	A	A	A	B	B	A	B	A	B	B	A	A	A	B	X	A	B	A	A	B	A	B	B
GM06:50670850	A	B	A	X	A	A	A	A	A	A	X	A	B	B	A	B	A	B	A	B	B	A	B	A	B	B	A	A	A	B	B	A	B	A	B	B	A	A	B	B	A	A	B	A	A	X	A	B	B
GM06:50676248	A	B	A	X	A	A	A	A	A	A	A	A	B	B	A	B	A	B	A	B	B	A	B	A	B	B	A	A	A	B	B	A	B	A	B	B	A	A	B	B	A	A	B	A	A	B	A	B	B
GM06:50746074	A	X	X	A	A	A	A	A	A	A	X	A	B	B	A	B	A	B	A	B	B	A	B	A	B	B	A	A	B	B	B	A	B	A	B	B	A	A	B	B	A	A	B	A	A	X	A	B	B
GM06:50788657	A	A	X	A	A	A	A	A	A	A	X	A	B	B	A	B	A	B	A	B	B	A	B	A	A	B	A	A	B	B	B	A	B	A	B	B	A	A	B	B	A	A	B	A	A	X	A	B	B
GM06:50794296	A	B	A	X	X	A	A	A	A	A	X	A	B	B	A	B	A	B	A	B	B	A	B	A	B	B	A	A	B	B	B	A	B	A	B	B	A	A	B	B	X	A	B	A	A	X	A	B	B
GM06:50873632	A	X	A	X	X	A	A	A	A	A	A	A	B	B	A	B	A	B	A	B	B	A	B	A	B	B	A	A	A	B	B	A	B	A	B	B	A	A	B	B	A	A	B	A	A	X	A	B	B
GM06:50878935	A	B	A	X	B	A	A	A	A	A	X	A	B	B	A	B	A	B	A	B	B	A	B	A	B	B	A	A	B	B	B	A	B	A	B	B	A	A	B	B	A	A	B	A	A	B	A	B	B
GM06:51031299	A	X	X	B	B	A	A	A	A	A	X	A	B	B	A	B	A	B	A	B	B	A	B	A	B	B	A	A	A	B	B	A	B	A	B	B	A	A	B	B	A	A	B	A	X	X	A	B	B
GM06:51041386	A	X	A	B	A	A	A	A	A	A	A	A	B	B	A	B	A	B	A	B	B	A	B	A	A	B	A	A	B	B	B	A	B	A	B	B	A	A	B	B	A	A	B	A	A	A	A	B	B
GM06:51073785	A	A	X	A	B	A	A	A	A	A	X	A	B	B	A	B	A	B	A	B	B	A	B	A	A	B	A	A	B	B	B	A	B	A	B	B	A	A	B	B	A	A	B	A	A	X	A	B	B
GM06:51150878	A	B	B	B	B	A	A	A	A	A	B	A	B	B	A	B	A	B	A	B	B	X	B	A	B	B	B	X	B	B	B	A	B	A	B	B	A	A	B	B	A	A	B	A	A	B	A	B	B
GM06:51158333	A	B	B	B	A	A	A	A	A	A	X	A	B	B	A	B	A	B	A	B	B	A	B	A	B	B	B	A	B	B	B	A	B	A	B	B	A	A	B	B	A	A	B	A	A	B	A	B	B
GM07:3432044	A	A	A	B	B	B	A	A	B	A	A	A	B	B	A	B	B	B	B	A	A	A	B	B	A	B	B	A	X	B	B	A	B	A	A	B	A	A	B	B	A	A	B	A	A	B	B	B	B
GM07:3625902	X	A	A	B	B	B	A	A	B	A	A	A	B	B	A	B	B	B	B	A	A	A	B	B	A	B	B	A	A	B	B	A	A	A	A	B	A	A	X	B	A	A	B	A	X	B	B	X	B
GM07:3896894	B	A	A	B	B	B	A	A	B	A	A	A	X	B	A	B	B	B	B	A	A	A	B	B	A	B	B	A	A	B	B	A	A	A	A	B	A	A	A	B	A	A	B	A	A	B	X	X	B
GM07:3967705	A	A	A	B	B	B	A	A	B	A	A	A	B	B	A	B	B	B	B	A	A	A	B	B	A	B	B	A	A	B	B	A	A	A	A	B	A	A	A	B	A	A	X	A	X	B	A	A	B
GM07:4208392	X	A	A	B	B	B	A	A	B	A	A	A	B	B	X	B	B	A	B	A	A	A	B	B	A	B	B	A	B	B	B	A	A	A	A	B	A	A	A	B	A	A	B	A	X	B	B	B	B
GM07:5256305	B	A	A	B	B	B	A	A	B	A	A	A	B	B	X	B	B	A	B	A	A	A	B	B	A	B	B	A	B	B	B	A	A	A	A	B	A	A	A	A	A	A	A	A	B	B	B	A	B
GM07:5279354	X	A	A	B	B	B	A	A	B	A	A	A	B	B	A	B	B	A	B	A	A	A	B	B	A	B	B	A	B	B	B	A	A	A	A	B	A	A	A	B	A	A	X	A	B	B	B	A	B
GM07:5343324	X	A	A	B	B	B	A	A	B	A	A	A	B	B	X	X	B	A	B	A	A	A	B	B	A	B	B	A	X	B	B	A	A	A	A	B	A	A	A	B	A	A	X	A	B	B	B	B	B
GM07:5354095	B	A	A	B	B	B	A	A	B	A	A	A	B	B	A	X	B	A	B	A	A	A	B	B	A	B	B	A	A	B	B	A	A	A	A	B	A	A	A	B	A	A	A	A	B	B	B	A	B
GM07:5391740	B	A	A	B	B	B	A	A	B	A	A	A	B	B	X	B	B	A	B	A	A	A	B	B	A	B	B	A	A	B	B	A	A	A	A	B	A	A	A	B	A	A	A	A	B	B	B	A	B
GM07:5404867	X	A	A	B	B	B	A	A	B	A	A	A	B	B	B	X	B	B	B	A	A	A	B	B	A	B	B	A	X	B	B	A	A	A	A	B	A	A	A	B	A	A	X	A	B	B	B	B	B
GM07:5404971	B	A	A	B	B	B	A	A	B	A	A	A	X	B	B	B	B	B	B	A	A	A	B	B	A	B	B	A	B	B	B	A	A	A	A	B	A	A	A	B	A	A	B	A	B	B	B	X	B
GM07:5405155	X	A	A	B	B	B	A	A	B	A	A	A	B	B	B	B	B	B	B	A	A	A	B	B	A	B	B	A	A	B	B	A	A	A	A	B	A	A	A	B	A	A	X	A	B	B	B	B	B
GM07:5419620	B	A	A	B	B	B	A	A	B	A	A	A	B	B	X	B	B	B	B	A	A	A	B	B	A	B	B	A	A	B	B	A	A	A	A	B	A	A	A	B	A	A	X	A	B	B	B	X	B
GM07:5482581	B	A	A	B	B	B	A	A	B	A	A	A	B	B	X	X	B	B	B	A	A	A	B	B	A	B	B	A	A	B	B	A	A	A	A	B	A	A	A	B	A	A	B	A	B	B	B	A	B
GM07:5640903	B	A	A	B	B	B	A	A	B	B	A	A	B	B	X	X	B	B	B	A	A	A	B	B	A	B	B	A	A	B	B	A	A	A	A	B	A	A	A	B	A	A	A	A	B	B	B	A	B
GM07:5802158	B	A	A	B	B	B	A	A	B	B	A	A	B	B	X	B	B	X	B	A	A	A	B	B	A	B	B	A	A	B	B	A	A	A	A	B	A	A	A	B	A	A	A	A	B	B	B	A	B
GM07:5876830	B	A	A	B	B	B	A	A	B	B	A	A	B	B	A	X	B	A	B	A	A	A	B	B	A	B	B	A	A	B	B	A	A	A	A	B	A	A	A	B	A	A	A	A	B	B	B	A	B
GM07:6066868	A	A	A	B	B	B	A	A	B	B	A	A	B	B	A	X	B	A	B	A	A	A	B	B	A	B	B	A	A	B	B	A	A	A	A	B	A	A	A	B	A	A	A	A	B	B	B	X	B
GM07:6184836	A	A	A	B	B	B	A	A	B	B	A	A	B	B	X	X	B	A	B	A	A	A	B	B	A	B	B	A	A	B	B	A	A	A	A	B	A	A	B	B	A	A	A	A	B	B	B	B	B
GM07:6187284	A	A	A	B	B	B	A	A	B	B	A	A	B	B	A	B	B	A	B	A	A	A	B	B	A	B	B	A	A	B	B	A	A	A	A	B	A	A	B	B	A	A	A	A	B	B	B	X	B
GM07:6280510	A	A	A	B	B	B	A	A	B	B	A	A	B	B	A	B	B	A	B	A	A	A	B	B	A	B	B	A	X	B	B	A	A	A	A	B	A	A	B	B	A	A	B	A	B	B	B	A	B
GM07:6320741	A	A	A	B	B	B	A	A	B	B	A	A	B	B	X	X	B	B	B	A	A	A	B	B	A	B	B	A	X	B	B	A	A	A	A	B	A	A	B	B	A	A	B	A	B	B	B	A	B
GM07:6329849	A	A	A	B	B	B	A	A	B	B	A	A	B	B	A	X	B	B	B	A	A	A	B	B	A	B	B	A	A	B	B	A	A	A	A	B	A	A	B	B	A	A	A	A	B	B	B	A	B
GM07:6337131	A	A	A	B	B	B	A	A	B	B	A	A	B	B	B	X	B	B	B	A	A	A	B	B	A	B	B	A	A	B	B	A	A	A	A	B	A	A	B	B	A	A	A	A	B	B	B	A	B
GM07:6363160	A	A	A	B	B	B	A	A	B	B	A	A	B	B	X	B	B	B	B	A	A	A	B	B	A	B	B	A	X	B	B	A	A	A	A	B	A	A	B	B	A	A	B	A	B	B	B	X	B
GM07:6446689	A	A	A	B	B	B	A	A	B	B	A	A	B	B	B	X	B	B	B	A	A	A	B	B	A	B	B	A	A	B	B	A	A	A	A	B	A	X	B	B	A	A	A	A	B	B	B	X	B
GM07:6579285	A	A	A	A	B	B	A	A	B	B	A	A	B	B	B	B	B	B	B	A	A	A	B	B	A	B	B	A	X	B	B	A	A	A	A	B	A	A	B	B	A	A	B	A	B	B	B	X	B
GM07:6613832	A	A	A	B	B	B	A	A	B	B	A	A	B	B	X	B	B	B	B	A	A	A	B	B	A	B	B	A	X	B	B	A	A	A	A	B	A	A	B	B	A	A	B	A	B	B	B	A	B
GM07:6889969	A	A	A	B	B	B	A	A	B	B	A	A	B	B	X	X	B	B	B	A	A	A	B	B	A	B	B	A	A	B	B	A	A	A	A	B	A	A	B	B	A	A	A	A	B	B	B	B	B
GM07:6890075	A	A	A	B	B	B	A	A	B	B	A	A	B	B	X	X	B	B	B	A	A	A	B	X	A	B	B	A	A	B	B	A	A	A	A	B	A	A	B	B	A	A	B	A	B	B	B	B	B
GM07:7096329	A	A	A	B	B	B	A	A	B	B	A	A	B	B	A	A	B	B	B	A	A	A	B	X	A	B	B	A	B	B	B	A	A	A	A	B	A	A	B	B	A	A	A	A	B	B	B	B	B
GM07:7097110	A	A	A	B	B	B	A	A	B	B	A	A	B	B	A	B	B	B	B	A	A	A	B	X	A	B	B	A	B	B	B	A	A	A	A	B	A	A	B	B	A	A	B	A	B	B	B	B	B
GM07:7097221	A	A	A	B	B	B	A	A	B	B	A	A	B	B	A	B	B	B	B	A	A	A	B	B	A	B	B	A	A	B	B	A	A	A	A	B	A	A	B	B	A	A	B	A	B	B	B	B	B
GM07:7668053	A	B	A	B	B	B	A	A	B	B	A	A	B	B	A	A	B	B	B	B	A	A	B	B	A	B	B	A	A	B	B	A	A	A	A	B	A	A	B	B	A	A	X	A	B	B	B	B	B
GM07:7788607	A	B	A	A	A	B	A	A	B	B	A	A	B	B	A	X	A	B	B	B	A	A	A	A	A	B	B	A	A	B	B	A	A	A	A	B	A	A	B	B	A	A	B	A	B	B	B	B	B
GM07:8104503	A	B	A	A	A	B	A	A	B	B	A	A	B	B	A	A	A	B	B	B	A	B	A	A	B	B	B	A	A	B	B	A	A	A	A	B	A	A	B	B	A	A	B	A	B	B	B	B	B
GM07:8139364	A	B	A	A	X	B	A	A	B	B	A	A	B	B	X	B	A	B	B	B	A	B	A	A	B	B	B	A	A	B	B	A	A	A	A	B	A	A	B	B	A	A	B	A	B	B	B	B	B
GM07:8239255	A	B	A	A	A	B	A	A	B	B	A	A	B	B	A	A	A	B	B	B	A	B	A	A	B	B	B	A	A	B	B	A	A	A	A	B	A	A	B	B	A	A	B	A	B	B	B	B	B
GM07:8485393	A	B	A	A	A	B	A	A	B	B	A	A	B	B	A	A	A	B	B	B	A	B	B	A	B	B	B	A	A	B	B	A	A	A	A	B	A	A	B	B	A	A	B	A	B	B	B	B	B
GM07:8509917	A	B	A	A	A	B	A	A	B	B	A	B	B	B	A	A	A	B	B	B	A	B	A	A	B	B	B	A	A	B	B	A	A	A	A	B	A	A	B	B	X	A	B	A	B	B	B	B	B
GM07:8633709	A	B	A	A	A	B	A	A	B	B	A	B	B	B	A	A	A	B	B	B	A	B	A	A	B	B	B	A	A	B	B	A	A	A	A	B	A	A	B	B	B	A	B	A	B	B	B	B	B
GM07:8783582	A	B	A	A	B	B	A	A	B	B	A	B	B	B	A	A	A	B	B	B	A	B	A	A	B	B	B	A	A	B	B	B	A	A	A	B	A	A	B	B	B	A	B	A	B	B	B	B	B
GM07:8878603	A	B	A	A	B	B	A	A	A	B	A	B	B	B	A	A	A	B	B	B	A	B	A	A	B	B	B	A	A	B	B	B	A	A	A	B	A	A	B	B	B	B	B	A	B	B	B	B	B
GM07:9045053	A	B	A	A	B	B	A	A	A	B	A	B	B	B	A	A	A	B	B	B	A	B	A	A	B	B	B	A	A	B	B	B	A	A	A	B	A	A	B	B	B	B	B	A	B	B	B	B	B
GM07:9082658	A	B	A	A	A	B	A	A	A	B	A	B	B	B	A	A	A	B	B	B	A	B	A	A	B	B	B	A	A	B	B	B	A	A	A	B	A	A	B	B	B	X	B	A	B	B	B	B	B
GM07:9552301	A	B	A	A	X	B	A	A	A	B	A	B	B	B	A	A	A	B	B	B	A	B	A	A	B	B	B	A	A	B	B	B	A	A	A	B	A	X	B	B	B	A	B	A	B	B	B	B	B
GM07:9552478	A	B	A	A	A	B	A	A	A	B	A	B	B	B	A	A	A	B	B	B	A	B	A	A	B	X	B	A	A	B	B	B	A	A	A	B	A	A	B	B	B	A	B	A	B	B	B	B	B
GM07:10448360	A	B	A	A	B	X	A	A	A	B	A	B	B	B	X	A	A	B	B	B	A	B	A	A	B	A	B	B	B	B	X	B	A	A	A	B	A	A	B	B	A	A	B	A	B	B	B	B	B
GM07:10462066	A	B	A	A	B	B	A	A	A	B	A	B	B	B	A	A	A	B	B	B	A	B	A	A	B	X	B	B	B	B	B	B	A	A	A	B	A	A	B	B	A	A	B	A	B	B	B	B	B
GM07:10474373	A	B	A	A	X	B	A	A	A	B	A	B	B	B	A	A	A	B	B	B	A	B	A	A	B	A	B	B	B	B	X	B	A	A	A	B	A	A	B	B	A	A	B	A	B	B	B	B	B
GM07:10899877	A	B	A	A	X	B	A	A	A	B	A	B	B	B	B	A	A	B	B	B	A	B	A	A	B	A	B	B	B	B	A	B	A	A	A	A	A	A	B	B	A	A	B	A	B	B	B	B	B
GM07:10930698	A	B	A	A	B	B	A	A	A	B	A	B	B	B	B	A	A	B	B	B	A	B	A	A	B	A	B	B	B	B	A	B	A	A	A	A	A	A	B	B	A	A	B	A	B	B	B	B	B
GM07:10989740	A	B	A	A	B	B	A	A	A	B	A	B	B	B	B	A	A	B	B	B	A	B	A	A	B	A	B	B	B	B	A	B	A	A	A	B	A	A	B	B	A	A	B	A	B	B	B	B	B
GM07:10989848	A	B	A	A	B	B	A	A	A	B	A	B	B	B	B	A	A	B	B	B	A	B	A	A	B	A	B	A	B	B	A	B	A	A	A	A	A	A	B	B	A	A	B	A	B	B	B	B	B
GM07:11290260	A	B	A	A	B	B	A	A	A	B	A	B	B	B	B	A	A	B	B	B	A	B	A	A	B	A	B	A	B	B	A	B	A	A	A	X	A	A	B	B	A	A	B	A	B	B	B	B	B
GM07:11290417	A	B	A	A	B	B	A	A	A	B	A	B	B	B	B	A	A	B	B	B	A	B	A	A	B	A	B	A	B	B	A	B	A	A	A	X	A	A	B	B	A	A	B	A	B	B	B	B	B
GM07:11298849	A	B	A	A	B	B	A	A	A	B	A	B	B	B	B	A	A	B	B	B	A	B	A	A	B	A	B	A	B	B	A	B	A	A	A	X	A	A	B	B	A	A	B	A	B	B	B	B	B
GM07:11839482	A	B	A	A	X	B	A	A	A	B	A	B	B	B	B	A	A	B	B	B	A	B	A	A	B	A	B	A	B	B	A	B	A	A	A	X	A	A	B	B	A	A	B	A	B	B	B	B	B
GM07:13784462	X	B	A	B	B	B	A	A	A	B	A	B	B	B	B	B	A	B	B	B	A	B	A	A	B	A	B	A	B	B	X	B	A	A	A	B	A	A	B	B	A	B	B	A	B	B	B	B	B
GM07:15605901	A	B	A	B	A	X	A	A	A	B	A	B	A	B	X	B	A	B	B	X	A	B	A	A	B	A	B	A	A	B	X	B	A	A	A	B	A	A	B	B	A	B	X	A	B	B	B	B	B
GM07:15769765	A	B	A	B	A	B	A	A	A	B	A	B	B	B	A	B	A	B	B	A	A	B	A	A	B	A	B	A	A	B	A	B	A	A	A	B	A	A	B	B	A	B	X	A	B	B	B	B	B
GM07:16614015	A	B	A	B	A	B	A	A	A	B	A	B	B	B	A	B	A	B	B	A	A	B	A	A	B	A	B	A	A	B	A	B	A	A	A	B	A	A	B	B	A	B	A	A	B	B	B	B	B
GM07:16614154	A	B	A	B	A	B	A	A	A	B	A	B	B	B	B	B	A	B	B	A	A	B	A	A	B	A	B	A	A	B	A	B	A	A	A	B	A	A	B	B	A	B	A	A	B	B	B	B	B
GM07:17561316	X	B	A	B	A	B	A	A	A	B	A	B	B	B	B	B	A	B	B	A	A	B	A	A	B	A	A	X	A	A	A	B	A	A	A	B	A	A	B	B	A	B	A	A	B	A	B	B	B
GM07:18269772	A	B	A	B	A	X	A	A	A	B	A	B	B	B	B	B	A	B	B	A	A	B	A	A	B	A	A	X	A	A	A	B	A	A	A	B	A	A	B	B	A	B	A	A	B	A	B	B	B
GM07:18933523	A	B	A	B	A	B	A	A	A	B	A	B	B	B	B	B	A	B	B	A	A	B	A	A	B	A	A	X	A	A	A	B	A	A	A	B	A	A	B	B	A	B	A	A	B	A	B	B	B
GM07:19067814	A	B	A	B	A	B	A	A	A	B	A	B	X	B	B	B	A	B	B	A	A	A	A	A	B	A	A	X	A	A	A	B	A	A	A	B	A	A	B	B	A	B	A	A	B	A	B	B	B
GM07:19269597	A	B	A	B	A	B	A	A	A	B	A	B	A	B	B	B	A	B	B	A	A	B	A	A	B	A	A	X	A	A	A	B	A	A	A	B	A	A	B	B	A	B	A	A	B	A	B	B	B
GM07:19329390	A	B	A	B	A	B	A	A	A	B	A	B	X	B	B	B	A	B	B	A	A	A	A	A	B	A	A	X	A	A	A	B	A	A	A	B	A	A	B	B	A	B	A	A	B	A	B	B	B
GM07:35252374	A	B	A	B	A	B	A	A	A	B	A	B	B	B	B	B	B	B	B	B	A	X	A	A	X	A	A	B	B	A	A	B	A	A	A	B	A	A	B	B	A	B	A	A	B	A	B	B	B
GM07:35743521	A	B	A	B	A	X	A	A	A	B	A	B	A	B	B	B	A	B	B	B	A	B	A	A	A	A	A	B	B	A	A	B	A	A	A	B	A	A	X	B	A	B	X	A	B	A	B	B	X
GM07:42393347	A	A	A	B	B	B	B	B	B	B	B	B	X	A	B	B	B	X	B	X	A	B	X	A	B	B	B	B	B	A	B	B	X	A	B	B	X	B	B	A	B	B	B	A	X	B	B	B	B
GM07:44074132	A	A	A	B	B	B	B	B	B	A	B	B	B	A	A	B	B	B	X	A	A	B	X	A	B	B	B	B	A	A	B	B	B	X	B	B	X	B	B	B	B	B	B	B	X	A	B	B	B
GM07:44171678	A	B	A	B	B	B	B	B	B	A	B	B	B	A	A	B	B	B	X	A	A	B	X	A	B	B	B	B	A	A	B	B	B	X	B	B	X	B	B	B	B	B	B	B	X	A	B	B	B
GM07:44499997	A	B	A	B	B	B	B	B	B	A	B	B	X	A	A	B	B	B	B	A	A	B	X	A	B	B	B	B	A	A	B	B	X	A	B	B	X	B	B	B	A	B	B	B	B	A	B	B	B
GM08:111901	X	A	A	A	B	A	A	A	A	X	B	A	A	B	A	A	B	B	B	A	B	A	A	B	A	B	A	B	B	A	A	B	B	X	A	A	A	A	A	B	A	B	A	B	X	B	A	B	A
GM08:1120179	X	A	A	A	A	A	B	A	A	B	X	A	A	B	A	A	B	B	B	A	B	A	A	B	A	B	A	B	B	A	A	B	B	X	A	B	A	B	A	B	A	B	A	B	A	A	B	B	A
GM08:1193675	X	A	A	A	A	A	B	A	A	B	X	A	A	B	A	A	B	B	B	A	B	A	A	B	A	B	A	B	B	A	A	B	B	B	A	A	A	X	A	B	A	B	A	B	A	A	X	B	A
GM08:1436191	B	A	A	A	A	A	B	A	A	B	B	A	A	B	A	A	B	B	B	A	B	A	A	B	A	B	A	B	B	A	A	B	B	X	A	B	A	B	A	B	A	B	A	B	A	B	B	B	A
GM08:1704041	B	A	A	A	A	A	B	A	A	B	B	A	A	B	A	A	B	B	B	A	B	A	A	B	A	B	A	B	B	A	A	B	B	A	A	B	A	B	A	B	A	B	A	B	A	B	A	B	A
GM08:1769049	B	A	A	A	A	A	B	A	A	B	B	A	A	B	A	A	B	B	B	A	B	A	A	B	X	B	A	B	B	A	A	B	B	A	A	B	A	A	A	B	A	B	A	B	A	A	B	B	A
GM08:1769079	B	A	A	A	A	A	B	A	A	B	B	A	A	B	A	A	B	B	B	A	B	A	A	B	A	B	A	B	B	A	A	B	B	A	A	B	A	A	A	B	A	B	A	B	A	A	B	B	A
GM08:1819314	B	A	A	A	A	A	B	A	A	B	B	A	A	B	A	A	B	B	B	A	B	A	A	B	X	B	A	B	B	A	A	B	B	A	A	B	A	X	A	B	A	B	A	B	A	B	X	B	A
GM08:1892288	B	A	A	A	A	A	B	A	A	B	B	A	A	B	A	A	B	B	B	A	B	A	A	B	B	A	A	B	B	A	A	B	B	A	A	B	A	B	A	B	A	B	A	B	A	A	X	B	A
GM08:1972665	B	A	A	A	A	A	B	A	A	B	B	A	A	B	A	A	B	B	B	A	B	A	A	B	X	A	A	B	B	A	A	B	B	A	A	B	A	B	A	B	A	B	A	B	A	A	B	B	A
GM08:1972904	B	A	A	A	A	A	B	A	A	B	B	A	A	A	A	A	B	B	B	A	B	A	A	B	X	A	A	B	A	A	A	B	B	A	A	B	A	B	A	B	A	B	A	B	A	B	B	B	A
GM08:2316989	B	A	A	A	A	X	B	A	A	B	B	A	A	B	A	B	B	B	B	A	B	A	A	B	B	A	A	B	B	A	A	B	B	A	A	B	A	A	A	B	A	B	A	A	A	A	B	B	A
GM08:2469112	B	A	A	A	A	X	B	A	A	B	B	A	A	B	A	B	B	B	B	A	B	A	A	B	B	A	A	B	B	A	A	B	B	A	A	B	A	A	A	B	A	B	A	A	A	A	B	B	A
GM08:2933363	B	X	A	A	A	X	B	A	A	B	B	A	A	B	B	B	B	B	B	A	B	A	A	B	B	A	A	A	B	A	A	X	B	X	A	B	A	A	A	B	A	A	A	A	A	B	X	B	A
GM08:3041406	B	X	A	A	A	A	B	A	A	B	B	A	A	X	B	B	B	B	B	A	B	A	A	B	B	A	A	A	B	A	A	X	B	B	A	B	A	A	A	B	A	A	A	A	A	B	B	B	A
GM08:3184446	B	X	A	A	A	A	B	A	A	B	B	A	A	B	B	B	B	B	B	A	X	A	A	B	B	A	A	A	B	A	A	A	B	B	A	B	A	A	A	B	A	A	A	A	A	A	B	B	A
GM08:3298412	B	X	A	A	A	X	B	A	A	B	B	A	A	B	B	B	B	B	B	A	B	A	A	B	B	A	A	A	B	A	A	X	B	B	A	B	A	A	A	B	A	A	A	A	A	B	B	B	A
GM08:3321720	B	B	A	A	A	X	B	A	A	B	B	A	A	B	B	B	B	B	B	A	X	A	A	B	B	A	A	A	B	A	A	X	B	X	A	B	A	A	A	B	A	A	A	A	A	B	B	X	A
GM08:3345430	B	B	A	A	A	X	B	A	A	B	B	A	A	B	B	B	B	B	B	A	B	A	A	B	B	A	A	A	B	A	A	X	B	X	A	B	A	A	A	B	B	B	A	A	A	A	B	B	A
GM08:3504269	B	A	A	A	A	B	B	A	A	B	B	A	A	B	B	B	B	B	B	A	B	A	A	B	B	A	A	X	B	A	A	A	B	A	A	B	A	A	A	A	A	A	A	A	A	A	B	X	A
GM08:3640498	B	A	A	A	A	B	B	A	A	B	B	A	A	B	B	B	B	B	B	A	B	A	A	X	B	A	A	X	B	A	A	A	B	B	A	B	A	A	A	A	A	A	A	A	A	X	A	B	A
GM08:3669214	B	A	A	A	A	B	B	A	A	B	B	A	A	B	B	B	B	B	B	A	B	A	A	A	B	A	A	A	B	A	A	A	B	B	A	B	A	A	A	A	A	A	A	A	A	X	B	B	A
GM08:3676493	B	A	A	A	A	X	B	A	A	B	B	A	A	B	B	B	B	B	B	A	B	A	A	B	B	A	A	X	B	A	A	A	B	B	A	B	A	A	A	A	A	A	A	A	A	A	B	B	A
GM08:3692054	B	A	A	A	A	X	B	A	A	B	B	A	A	B	B	B	B	B	B	A	B	A	A	A	B	A	A	A	B	A	A	A	B	X	A	B	A	A	A	A	A	A	A	A	A	A	A	B	A
GM08:3765617	B	A	A	A	A	B	B	A	A	B	B	A	A	B	B	B	B	B	B	A	B	B	A	B	B	A	A	X	B	A	A	A	B	B	A	B	A	A	A	A	A	A	A	A	A	A	X	B	A
GM08:3769850	B	A	A	A	A	X	B	A	A	B	B	A	A	B	B	B	B	B	B	A	B	B	A	B	B	A	A	A	B	A	A	A	B	A	A	B	A	A	A	A	A	A	A	A	A	X	A	B	A
GM08:3846101	B	A	A	A	A	B	B	A	A	B	B	A	A	B	B	B	B	B	B	A	B	B	A	B	B	A	A	X	B	A	A	A	B	B	A	B	A	A	A	A	A	A	A	A	A	X	X	B	A
GM08:4620261	B	A	A	B	A	A	B	A	A	B	B	A	A	B	A	A	B	B	B	A	B	B	A	B	B	A	A	B	B	A	A	B	X	B	B	B	A	X	B	A	A	B	A	A	A	X	B	B	A
GM08:4810722	B	A	A	B	A	X	B	A	A	B	B	A	A	B	A	A	B	B	B	A	B	B	A	A	B	A	A	B	B	A	A	B	A	A	B	B	A	A	B	A	A	B	A	A	A	X	B	B	A
GM08:4926375	B	A	A	B	X	X	B	A	A	B	B	B	A	B	A	A	B	B	B	A	B	B	A	B	B	A	A	B	B	A	A	B	X	A	B	B	A	X	B	A	A	B	A	A	A	X	B	B	A
GM08:4936146	B	A	A	B	A	A	B	A	A	B	B	B	A	B	A	A	B	B	B	A	B	B	A	B	B	A	A	X	B	A	A	B	X	B	B	B	A	A	B	B	A	B	A	A	A	B	B	B	A
GM08:4998772	B	A	A	B	A	A	B	A	A	B	B	B	A	B	A	A	B	B	B	A	B	B	A	B	B	A	A	A	B	A	A	B	X	A	B	B	A	A	B	A	A	B	A	A	A	A	B	B	A
GM08:5005929	B	A	A	B	A	X	B	A	A	B	B	B	A	B	A	A	B	B	B	A	B	B	A	B	B	A	A	A	B	A	A	B	X	A	B	B	A	X	B	B	A	B	A	A	A	X	B	B	A
GM08:5064558	B	A	A	B	A	X	B	A	A	B	B	B	A	B	A	A	B	B	B	A	B	B	A	B	B	A	A	A	B	A	A	B	X	A	B	B	A	A	B	B	A	B	A	A	A	A	B	B	A
GM08:5086684	B	A	A	B	A	A	B	A	A	B	B	B	A	B	A	A	B	B	B	A	X	B	A	B	B	A	A	A	B	A	A	B	A	A	B	B	A	A	B	A	A	B	A	A	A	B	B	B	A
GM08:5110621	B	A	A	B	A	A	B	A	A	B	B	B	A	B	A	A	B	B	B	A	X	B	A	B	B	A	A	X	B	A	A	B	A	A	B	B	A	A	B	A	A	B	A	A	A	B	B	B	A
GM08:5121642	B	A	A	B	A	A	B	A	A	B	B	B	A	B	A	A	B	B	B	A	X	B	A	B	B	A	A	B	B	A	A	B	A	A	B	B	A	A	B	A	A	B	A	A	A	B	B	B	A
GM08:5153011	B	A	A	B	A	A	B	A	A	B	B	B	A	B	A	A	B	B	B	A	B	B	A	B	B	A	A	A	B	A	A	B	X	A	B	B	A	X	B	A	A	B	A	A	A	A	B	B	A
GM08:5214542	B	A	A	B	A	A	B	A	A	B	B	B	A	B	A	A	B	B	B	A	B	B	A	A	B	A	A	A	B	A	A	B	X	A	B	B	A	X	B	A	A	B	A	A	A	A	B	B	A
GM08:5307068	B	A	A	B	A	X	B	A	A	B	B	B	A	B	A	A	B	B	B	A	B	B	A	B	B	A	A	A	B	A	A	B	X	A	B	B	A	A	B	A	A	B	A	A	A	A	B	B	A
GM08:5317465	B	A	A	B	A	B	B	A	A	B	B	B	A	B	A	A	B	B	B	A	B	B	A	A	B	A	A	A	B	A	A	B	A	A	B	B	A	A	B	A	A	B	A	A	A	A	X	B	A
GM08:5325750	B	A	A	B	A	B	B	A	A	B	B	B	A	B	A	A	B	B	B	A	B	B	A	A	B	A	A	A	B	A	A	B	A	A	B	B	A	A	B	A	A	B	A	A	A	A	X	B	A
GM08:5713697	B	A	A	B	A	B	B	B	A	B	B	B	A	B	A	A	B	B	B	B	B	B	A	X	B	A	A	A	B	A	A	B	A	A	B	B	B	B	B	A	A	B	A	A	A	A	X	B	A
GM08:5713821	B	A	A	B	A	B	B	B	A	B	B	B	A	B	A	A	B	B	B	B	B	B	A	B	B	A	A	B	B	A	A	B	X	A	B	B	B	B	B	A	A	B	A	A	A	A	B	B	A
GM08:5729235	B	A	A	B	A	B	B	B	A	B	B	B	A	B	A	A	B	B	B	B	B	B	A	A	B	A	A	B	B	A	A	B	X	A	B	B	B	B	B	A	A	B	A	A	A	A	B	B	A
GM08:6056263	B	A	A	B	A	B	B	B	A	B	B	B	A	B	A	A	B	B	B	B	B	B	A	B	B	A	A	A	B	A	A	B	A	A	B	B	B	B	A	A	A	B	A	A	A	A	X	B	A
GM08:6063363	B	A	A	B	A	B	B	B	A	B	B	B	A	B	A	A	B	B	B	B	B	B	A	A	B	A	A	A	B	A	A	B	B	A	X	B	B	B	A	A	A	B	A	A	A	A	X	B	A
GM08:6278975	B	A	A	B	A	X	B	B	A	B	B	B	A	B	A	A	B	B	B	B	A	B	A	B	B	A	A	A	B	A	A	B	B	A	B	B	B	B	A	A	A	B	A	A	A	A	X	B	A
GM08:6339036	B	A	A	B	A	B	B	B	A	B	B	B	A	B	A	A	B	B	B	B	B	B	A	B	B	A	A	B	B	A	A	B	X	A	A	B	B	B	A	A	A	B	A	A	A	A	B	B	A
GM08:6364708	B	A	A	B	A	B	B	B	A	B	B	B	A	B	A	A	B	B	B	B	B	B	A	B	B	A	A	B	B	A	A	B	X	A	X	B	B	B	A	A	A	B	A	A	A	A	B	B	A
GM08:6587476	B	A	A	B	A	B	B	B	A	B	B	B	A	B	A	A	B	B	B	B	A	B	A	B	B	A	A	B	B	A	A	B	X	A	B	B	B	B	A	A	A	B	A	A	A	A	B	B	A
GM08:10757609	B	A	X	A	A	X	B	B	A	B	A	B	A	B	B	B	A	B	B	B	A	A	B	B	B	A	A	A	B	B	B	B	X	A	B	B	B	B	A	A	A	A	A	A	A	A	A	X	B
GM08:10779014	B	A	B	A	A	B	B	B	A	B	A	B	A	B	B	B	A	B	B	B	A	A	B	B	B	A	A	A	B	B	B	B	X	A	B	B	B	B	A	A	A	A	A	A	A	A	A	X	A
GM08:10818603	B	A	B	A	A	B	B	B	A	B	A	B	A	B	B	B	A	B	B	B	A	A	B	B	B	A	A	A	B	B	B	B	X	A	B	B	B	B	A	A	A	A	A	A	A	A	A	X	A
GM08:10950188	B	A	B	A	A	B	B	B	A	B	A	B	A	B	B	B	A	B	B	B	A	B	B	B	B	A	A	A	B	B	B	B	X	A	B	B	B	B	A	A	A	A	A	A	A	A	A	X	A
GM08:11366738	B	A	B	A	A	B	B	B	A	B	A	B	A	B	B	B	A	A	A	B	A	B	B	B	A	A	A	A	B	B	B	B	B	A	A	B	B	B	A	A	A	A	A	A	A	A	A	B	B
GM08:11828882	B	A	B	A	A	B	B	B	A	B	A	B	A	B	B	B	A	A	A	B	A	B	B	B	A	A	A	A	B	B	B	A	A	A	A	B	B	B	A	A	A	A	A	A	A	A	A	B	A
GM08:12469521	B	A	B	A	A	B	B	B	A	B	A	B	A	B	B	B	A	A	A	B	A	B	B	B	A	A	A	A	B	B	B	A	A	A	A	B	B	B	A	A	A	A	A	A	A	A	A	B	A
GM08:13172103	B	A	B	A	A	B	B	B	A	B	A	B	A	B	B	B	A	A	A	B	A	B	B	B	A	B	A	A	B	B	B	A	A	A	A	B	B	B	A	A	A	A	A	A	A	A	A	B	A
GM08:13499298	B	A	B	A	A	B	B	B	A	B	A	B	A	B	B	B	A	A	A	B	A	B	B	B	A	B	A	A	B	B	B	A	A	A	A	A	B	B	A	A	A	A	A	A	A	A	A	B	A
GM08:13575798	B	A	B	A	A	B	B	B	A	B	A	B	A	B	B	B	A	A	A	B	A	B	B	B	A	B	A	A	B	B	B	A	A	A	A	A	B	B	A	A	A	A	A	A	A	A	A	B	X
GM08:13611762	B	A	B	A	A	B	B	B	A	B	A	B	A	B	B	B	A	A	A	B	A	B	B	B	A	A	A	A	B	B	B	A	A	A	A	A	B	B	A	A	A	A	A	A	A	A	A	B	A
GM08:14312703	B	A	X	A	A	B	B	B	A	B	A	B	A	B	B	B	A	B	X	B	A	B	B	B	A	B	A	A	B	A	B	A	A	A	A	X	B	B	X	A	A	A	A	A	A	A	A	B	B
GM08:14576068	B	A	B	B	B	B	B	B	A	B	A	B	A	B	B	B	A	B	X	B	A	B	B	B	A	B	A	A	B	A	B	A	A	A	A	A	B	B	X	A	A	A	A	A	A	A	A	X	A
GM08:14602272	B	A	B	B	B	B	B	B	A	B	A	B	A	B	B	B	A	A	X	B	A	B	B	B	A	B	A	A	B	A	B	A	A	A	A	B	B	B	X	A	A	A	A	A	A	A	A	A	X
GM08:14639570	B	A	B	B	B	B	B	B	A	B	A	B	A	B	B	B	A	A	B	B	A	B	B	B	A	B	A	A	B	A	B	A	A	A	A	B	B	B	X	A	A	A	A	A	A	A	A	A	X
GM08:14741771	B	A	B	B	B	B	B	B	X	B	A	B	A	B	A	B	A	A	B	B	A	B	B	B	A	B	A	A	B	A	B	A	A	A	A	X	B	B	A	A	A	A	A	A	A	A	A	A	X
GM08:14764328	B	A	B	B	B	B	B	B	X	B	A	B	A	B	A	B	A	A	B	B	A	B	B	B	A	B	A	A	B	A	B	A	A	A	A	X	B	B	A	A	A	A	A	A	A	A	A	A	X
GM08:14781011	B	A	B	B	B	B	B	B	A	B	A	B	A	B	A	B	A	A	B	B	A	B	B	B	A	B	A	A	B	A	B	A	A	A	A	X	B	B	A	A	A	A	A	A	A	A	A	B	A
GM08:15130452	B	X	B	B	B	B	B	B	B	B	A	B	A	B	A	B	A	A	B	B	B	B	B	B	A	B	A	A	B	A	B	A	A	A	A	B	B	B	X	A	A	A	A	A	A	A	A	X	A
GM08:15134636	B	A	B	B	B	B	B	B	X	A	A	B	A	B	A	B	A	A	B	B	A	B	B	B	A	B	A	A	B	A	B	A	A	A	A	X	B	B	X	A	A	A	A	A	A	A	A	X	A
GM08:15946082	B	A	B	A	B	X	B	B	A	B	A	B	A	B	A	B	A	A	B	A	A	B	B	B	A	B	A	A	B	A	B	A	A	A	A	A	B	B	A	A	A	A	X	A	A	A	A	A	A
GM08:16025534	B	A	B	A	B	B	B	B	X	B	A	B	A	B	A	B	A	A	B	A	A	B	B	B	A	B	A	A	B	A	B	B	A	A	A	A	B	B	A	A	A	A	A	A	A	A	A	A	B
GM08:16087625	B	A	B	A	B	B	B	B	B	B	A	B	A	B	A	B	A	A	B	A	A	B	B	B	A	B	A	A	B	A	B	B	A	A	A	A	B	B	A	A	A	A	A	A	A	A	A	A	A
GM08:16115403	B	A	A	A	B	B	B	B	X	B	A	B	A	B	A	B	A	A	B	A	A	B	A	B	A	B	A	A	B	A	X	B	A	A	A	A	B	B	A	A	A	A	A	A	A	A	A	A	A
GM08:16115503	B	A	A	A	B	B	B	B	X	B	A	B	A	B	A	B	A	A	B	A	A	B	A	B	A	B	A	A	B	A	B	B	A	A	A	A	B	B	A	A	A	A	A	A	A	A	A	A	A
GM08:16148760	B	A	A	A	B	B	B	B	X	B	A	B	A	B	A	B	A	A	B	A	A	B	A	B	A	B	A	A	B	A	B	B	A	A	A	A	B	B	A	A	A	A	X	A	A	A	A	A	B
GM08:16850668	B	A	A	X	B	B	B	B	B	B	A	B	A	B	A	B	A	A	B	X	B	B	A	B	B	B	A	B	B	A	B	B	A	A	B	A	B	B	A	A	A	B	X	A	A	A	B	A	B
GM08:17350110	B	A	A	A	B	B	B	B	B	B	A	B	A	B	A	B	A	A	X	A	B	B	A	B	B	B	A	X	B	A	B	X	A	A	B	A	B	B	X	A	B	B	B	A	A	A	X	A	A
GM08:17350308	B	A	A	A	B	B	B	B	B	B	A	B	A	B	A	B	A	A	X	A	B	B	A	B	B	B	A	X	B	A	A	B	A	A	B	A	B	B	X	A	B	B	X	A	A	A	B	A	A
GM08:17464651	B	A	A	A	B	B	B	B	B	B	A	B	A	B	A	B	A	A	X	A	B	B	A	B	B	B	A	B	B	A	B	B	A	A	B	A	B	B	B	A	B	B	X	A	B	A	B	A	A
GM08:17511087	B	A	A	A	B	B	B	B	B	B	A	B	A	B	A	B	A	A	X	A	B	B	A	B	B	B	A	B	B	A	B	B	A	A	B	A	B	B	B	A	B	B	A	A	B	A	B	A	A
GM08:17790797	B	A	A	A	B	B	B	B	B	B	A	B	A	B	A	B	A	A	A	A	B	B	A	B	B	B	A	B	B	A	B	B	A	A	B	A	B	B	B	A	B	B	A	A	B	A	B	X	A
GM08:18168229	B	A	A	X	B	B	B	B	B	B	A	B	A	B	A	A	A	A	A	A	B	A	A	B	B	B	A	A	B	A	B	B	A	A	X	A	B	B	X	A	B	B	A	A	B	A	B	A	A
GM08:18282543	B	A	A	A	B	B	B	B	B	B	A	B	A	B	A	A	A	A	A	A	B	A	A	B	B	B	A	A	B	A	X	B	A	A	X	A	B	B	A	A	B	B	A	A	B	A	B	A	A
GM08:18403233	B	A	A	X	B	B	B	B	B	B	A	B	A	B	B	A	A	A	A	A	B	A	A	B	B	B	A	A	B	A	B	B	A	A	B	A	B	B	B	A	B	B	A	A	B	A	B	A	A
GM08:18417608	B	A	A	A	B	B	B	B	B	B	A	B	A	B	A	A	A	A	A	A	A	A	A	B	B	B	A	A	B	A	B	B	A	A	B	A	B	B	A	A	B	B	A	A	B	A	B	A	A
GM08:18556738	B	A	A	A	B	B	B	B	B	B	A	B	A	B	A	A	A	A	A	A	B	A	A	B	B	B	A	A	B	A	X	B	A	A	X	A	B	B	A	A	B	B	A	A	B	A	B	A	A
GM08:18768752	B	A	A	A	B	B	B	B	B	B	A	B	A	B	X	A	A	B	A	A	B	A	A	B	B	B	A	A	B	A	B	B	A	A	B	A	B	B	B	A	B	B	A	A	B	A	B	A	A
GM08:19333301	B	A	A	A	B	B	B	B	B	B	A	B	A	B	X	A	A	B	A	A	B	A	A	B	B	B	A	A	B	A	B	B	A	A	B	A	B	B	B	A	B	B	A	A	B	A	B	A	A
GM08:19639445	B	A	A	A	B	B	B	X	B	A	A	B	A	B	A	A	A	B	A	A	B	A	A	B	B	B	A	A	B	A	B	B	A	A	B	A	B	B	X	A	B	B	A	A	B	A	B	A	A
GM08:19657234	B	A	A	A	B	B	B	B	B	A	A	B	A	B	B	A	A	B	A	A	B	A	A	B	B	B	A	A	B	A	B	B	A	A	B	A	B	B	A	A	B	B	A	A	B	A	B	A	A
GM08:19657368	B	A	A	A	B	B	B	B	B	A	A	B	A	B	B	A	A	B	A	A	B	A	A	B	B	B	A	A	B	A	B	B	A	A	B	A	B	B	A	A	B	B	A	A	B	A	B	A	A
GM08:19723505	B	A	A	A	B	B	B	B	B	A	A	B	A	B	B	A	A	B	A	A	B	A	A	B	B	B	A	A	B	A	X	B	A	A	B	A	B	B	A	A	B	B	A	A	B	A	B	A	A
GM08:20876707	B	A	A	A	B	B	B	B	B	A	A	B	A	B	A	A	A	B	A	A	B	A	A	B	B	B	A	A	B	A	X	B	B	A	B	A	B	B	A	A	B	B	A	A	B	A	B	A	A
GM08:20953743	B	A	A	A	B	B	B	B	B	A	A	B	A	B	A	A	A	B	A	A	B	A	A	B	B	B	A	A	B	A	B	B	B	A	B	A	B	B	A	A	B	B	A	A	B	A	B	A	A
GM08:21153685	B	A	A	A	B	B	B	B	B	A	A	X	A	B	A	A	A	B	A	A	B	A	A	B	B	B	A	A	X	A	X	B	B	A	A	A	B	B	A	A	B	B	A	A	B	A	B	A	A
GM08:21154054	B	A	A	A	B	B	B	B	B	A	A	B	A	B	B	A	A	B	A	A	B	A	A	B	B	B	A	A	B	A	X	B	B	A	B	A	B	B	A	A	B	B	A	A	B	A	B	A	A
GM08:21871259	B	A	A	X	B	B	B	B	A	A	A	B	A	B	X	A	A	B	A	A	B	A	A	B	B	B	A	A	A	A	B	B	B	A	B	A	B	B	A	A	B	B	A	A	X	A	B	A	A
GM08:22896471	B	A	A	X	B	B	B	B	A	A	A	B	A	B	X	A	A	B	B	B	B	A	A	B	B	B	A	A	A	A	B	B	B	A	B	A	B	B	A	A	B	B	A	A	B	A	B	A	A
GM08:22916450	B	A	A	A	B	B	B	B	A	A	A	B	A	B	X	A	A	B	B	B	B	A	A	B	B	B	A	A	A	A	X	B	B	A	B	A	B	B	A	A	B	B	A	A	B	A	B	A	A
GM08:22916633	B	A	A	X	B	B	B	B	A	A	A	X	A	B	B	A	A	B	B	B	B	A	A	B	B	B	B	A	X	A	X	B	B	A	X	A	B	B	A	A	B	B	A	A	B	A	B	A	A
GM08:23010598	B	A	A	B	B	B	B	B	A	A	X	B	A	B	B	X	A	B	B	B	B	A	A	B	B	B	B	A	A	A	B	B	B	A	B	A	B	B	B	A	B	B	A	A	B	B	B	A	B
GM08:23028384	B	A	A	A	B	B	B	B	A	A	A	X	A	B	B	A	A	B	B	B	B	A	A	B	B	B	A	A	A	A	B	B	B	A	B	A	B	B	A	A	B	B	A	A	B	A	B	A	A
GM08:23032179	B	A	A	B	B	B	B	B	A	A	A	X	A	B	B	A	A	B	B	B	B	A	A	B	B	B	A	A	A	A	A	B	B	A	B	A	B	B	A	A	B	B	A	A	B	A	B	A	A
GM08:23036778	B	A	A	X	B	B	B	B	A	A	A	X	A	B	B	A	A	B	B	B	B	A	A	B	B	B	B	A	A	A	A	B	B	A	B	A	B	B	A	A	B	B	A	A	B	B	B	A	A
GM08:23041212	B	A	A	X	B	B	B	B	A	A	A	X	A	B	B	A	A	B	B	B	B	A	A	B	B	B	B	A	A	A	A	B	B	A	B	A	B	B	A	A	B	B	A	A	B	B	B	A	A
GM08:23053524	B	A	A	A	B	B	B	B	A	A	A	B	A	B	B	A	A	B	B	B	B	A	A	B	B	B	A	A	A	A	A	B	B	A	B	A	B	B	X	A	B	B	A	A	B	A	B	A	A
GM08:24411496	B	A	A	A	B	B	B	B	A	A	A	B	A	B	X	A	A	B	B	B	B	A	A	X	B	B	A	A	B	A	B	B	B	A	A	A	B	B	X	A	B	B	A	A	B	B	B	A	A
GM08:24940502	B	A	A	A	B	B	B	B	A	A	A	B	A	B	X	A	A	B	B	B	B	A	A	A	B	B	B	A	B	A	B	B	B	A	X	A	B	B	X	A	B	B	A	A	B	B	B	A	A
GM08:25360707	B	A	A	B	B	B	B	B	A	A	A	B	A	B	B	A	A	B	B	B	B	A	A	B	B	B	B	A	B	A	B	B	B	A	B	A	B	B	B	A	B	B	A	A	B	B	B	A	A
GM08:27103260	B	A	A	B	B	B	B	B	A	A	A	B	A	B	X	A	A	B	B	B	B	A	A	B	B	B	A	A	B	A	X	B	B	A	B	A	B	B	B	A	B	B	A	A	B	B	B	A	A
GM08:32119337	B	A	A	A	B	B	B	B	A	A	A	B	A	B	B	A	A	B	B	B	B	A	A	B	B	B	A	A	B	A	B	B	B	A	A	A	B	B	X	A	B	B	A	A	B	B	B	A	A
GM08:32965900	B	A	A	A	B	B	B	B	A	A	A	B	A	B	X	A	A	B	B	B	B	X	A	A	B	B	X	A	B	A	A	B	B	A	A	A	B	B	X	A	B	B	A	A	B	B	B	A	A
GM08:36143883	B	A	A	A	B	B	B	B	A	A	A	B	A	B	B	A	A	B	B	B	B	A	A	A	B	B	B	A	B	A	B	B	B	A	A	A	B	B	A	A	B	B	A	A	B	B	B	A	A
GM08:36701294	B	A	A	A	B	B	B	B	A	A	A	B	A	B	A	A	A	B	B	B	B	A	A	A	B	B	B	A	B	A	B	B	B	A	A	A	B	B	A	A	B	B	A	A	B	B	B	A	A
GM08:36729169	B	A	A	A	B	B	B	B	A	A	A	B	A	B	B	A	A	B	B	B	B	A	A	A	B	B	B	A	B	A	B	B	B	A	A	A	B	B	A	A	B	B	A	A	B	B	B	A	A
GM08:36837649	B	A	A	A	B	B	B	B	A	A	A	B	A	B	X	A	A	B	B	B	B	A	A	A	B	B	X	A	A	A	A	B	B	A	A	A	B	B	A	A	B	B	A	A	X	B	B	A	A
GM08:36956679	B	A	A	A	B	B	B	B	A	A	A	B	A	B	B	A	A	B	B	B	B	A	A	A	B	B	B	A	B	A	B	B	B	A	A	A	B	B	A	A	B	B	A	A	B	B	B	A	A
GM08:37018962	B	A	A	B	B	B	B	B	A	A	A	B	A	B	X	A	A	B	B	B	B	A	A	A	B	B	B	A	B	A	B	B	B	A	X	A	B	B	X	A	B	B	A	A	B	B	B	A	A
GM08:37065867	B	A	A	B	B	B	B	B	A	A	A	B	A	B	A	A	A	B	B	B	B	A	A	A	B	B	B	A	B	A	B	B	B	A	A	A	B	B	A	A	B	B	A	A	B	B	B	A	A
GM08:37315337	B	A	A	B	B	B	B	B	A	A	A	B	A	B	A	A	A	B	A	B	B	A	A	A	B	B	B	A	B	A	B	B	B	A	A	A	B	B	A	A	B	B	A	A	B	B	B	A	A
GM08:37734197	B	A	A	A	B	B	B	B	A	A	A	B	A	B	A	A	A	B	A	B	B	A	A	B	B	B	B	A	A	A	B	B	A	A	A	A	B	B	A	A	B	B	A	A	B	B	B	A	A
GM08:37904321	B	A	A	B	B	B	B	B	A	A	A	B	A	B	X	A	A	B	A	B	B	A	A	B	B	B	B	A	B	A	B	B	B	A	A	A	B	B	A	A	B	B	A	A	X	B	B	A	A
GM08:38039254	B	A	A	B	B	B	B	B	A	A	A	B	A	B	B	A	A	B	A	B	B	A	A	B	B	B	B	A	B	A	B	B	B	A	X	A	B	B	A	A	B	B	A	A	B	B	B	A	A
GM08:38190719	B	A	A	B	B	B	B	B	A	A	A	B	A	B	B	A	A	B	A	B	B	A	A	A	B	B	B	A	A	A	B	B	B	A	A	A	B	B	A	A	B	B	A	A	B	B	B	A	A
GM08:38316702	B	A	A	B	B	B	B	B	A	A	A	B	A	B	B	A	A	B	A	B	B	A	A	A	B	B	B	A	A	A	B	B	B	A	A	A	B	B	A	A	B	B	A	A	B	B	B	A	A
GM08:38590133	B	A	A	A	B	B	B	B	A	A	A	B	A	B	A	A	A	B	A	B	B	A	A	B	B	B	B	A	B	A	B	B	A	A	X	A	B	B	A	A	B	B	A	A	B	B	B	A	A
GM08:40861671	B	A	A	A	B	B	B	B	A	A	A	B	A	B	B	A	A	B	A	B	A	A	A	B	B	B	A	A	B	B	A	B	A	A	B	A	B	B	A	A	B	B	A	A	B	B	B	A	B
GM08:41419023	B	A	A	A	B	B	B	B	A	A	A	B	X	B	X	A	A	B	A	B	A	A	A	B	B	B	A	A	B	B	A	B	A	A	B	A	B	B	A	A	B	B	A	A	B	B	B	A	B
GM08:46156971	B	A	B	B	B	X	A	A	A	A	A	B	B	X	B	A	B	A	B	B	A	A	B	A	A	A	A	A	A	A	B	B	A	B	B	A	A	A	A	B	A	B	B	B	B	B	B	A	B
GM08:46212417	B	A	B	B	B	A	A	A	A	A	A	B	X	A	B	A	B	A	B	B	A	A	B	A	A	A	A	A	A	A	B	B	A	B	B	A	A	A	A	B	A	B	B	B	B	B	B	A	B
GM08:46865349	B	A	B	B	B	A	A	A	A	A	A	B	X	B	B	A	B	A	B	B	A	A	B	A	A	A	A	A	A	A	B	B	A	B	B	A	A	A	A	B	A	B	B	B	A	B	A	A	B
GM08:47020034	B	A	B	B	B	A	A	A	A	A	A	B	A	A	B	A	B	A	B	B	A	A	B	A	A	A	A	A	A	A	B	B	A	B	B	A	A	A	A	B	A	B	B	B	A	B	A	A	B
GM08:47050105	B	A	B	B	B	A	A	A	A	A	A	B	B	A	B	A	B	A	B	B	A	A	B	A	A	A	A	A	A	A	B	B	A	B	B	A	A	A	A	B	A	B	B	B	A	B	A	A	B
GM08:47069726	B	A	B	B	B	A	A	A	A	A	A	B	B	A	B	A	B	A	B	B	A	A	B	A	A	A	A	B	A	A	B	B	A	B	B	A	A	A	A	B	A	A	B	B	A	A	A	A	B
GM08:47289756	B	A	B	B	B	A	A	A	A	A	A	B	B	A	B	A	B	A	X	A	A	A	B	A	A	A	A	B	A	A	B	B	A	B	B	A	A	A	A	B	A	A	B	B	A	A	A	A	B
GM08:47706704	B	A	B	B	B	A	A	A	A	A	A	B	X	X	B	A	B	A	A	A	A	A	B	A	A	A	A	B	A	A	B	B	A	B	B	A	A	A	A	B	A	B	B	B	A	A	A	A	B
GM08:47770836	B	A	B	B	B	A	A	A	A	A	A	B	B	X	B	A	B	A	A	A	A	A	B	A	A	A	A	B	A	A	B	B	A	B	B	A	A	A	A	B	A	B	B	B	A	A	A	A	B
GM09:2866157	A	B	A	A	B	A	A	B	A	A	B	A	B	A	A	B	A	B	A	X	B	B	A	A	A	A	A	B	B	B	A	A	A	B	A	B	A	X	A	B	B	B	A	B	B	B	A	B	A
GM09:2880605	A	B	A	A	B	A	A	B	A	A	B	B	B	A	A	B	A	B	A	X	B	B	A	A	A	A	A	B	B	B	A	A	B	B	A	B	A	X	A	B	B	B	A	B	B	B	A	B	A
GM09:2988923	A	B	A	A	B	A	A	B	A	A	B	B	B	A	A	B	A	B	A	B	B	B	A	A	A	A	A	B	B	B	A	A	X	B	A	B	A	A	A	B	B	B	A	B	B	B	X	B	A
GM09:3143547	A	B	A	A	B	A	A	A	A	A	B	A	B	A	A	B	A	B	A	X	B	B	A	A	A	A	A	B	B	B	A	A	A	B	A	B	A	A	A	B	B	X	A	B	B	B	A	B	A
GM09:4449890	A	B	A	B	B	A	A	A	A	A	A	A	B	A	A	B	B	B	A	B	B	B	A	A	A	A	B	B	B	B	A	A	A	B	A	B	A	A	A	B	B	A	A	B	B	B	A	B	A
GM09:4481104	A	B	A	B	B	B	A	A	A	A	A	A	B	A	A	B	B	B	A	B	B	B	A	A	A	A	B	B	B	B	A	A	A	B	A	B	A	A	A	B	B	A	A	B	B	B	A	B	A
GM09:4497929	X	B	A	B	B	A	A	A	A	A	A	X	B	A	A	B	B	B	A	B	B	B	A	A	A	A	X	B	B	B	A	A	A	A	A	B	A	A	A	B	B	A	A	B	B	B	A	B	A
GM09:4637648	A	B	A	B	B	A	A	A	A	A	A	B	B	A	A	B	B	B	A	B	B	B	A	A	A	X	A	B	B	B	A	A	B	A	A	B	A	A	A	B	B	A	A	A	B	B	A	B	A
GM09:5177615	A	B	A	B	B	A	A	A	A	A	A	A	B	A	A	B	B	B	A	B	B	B	A	A	A	B	X	B	B	B	A	A	A	B	A	B	A	A	B	B	B	A	A	A	B	B	A	B	A
GM09:5264976	A	B	A	B	B	A	A	A	A	A	A	B	B	A	A	B	B	B	A	B	B	B	A	A	A	B	X	B	B	B	A	A	X	X	A	B	A	A	B	B	B	A	A	A	B	B	A	B	A
GM09:5265094	A	B	A	A	B	A	A	A	A	A	A	X	B	A	A	B	B	B	A	B	B	B	A	A	A	B	X	B	B	B	A	A	A	X	A	B	A	A	B	B	B	A	A	A	X	B	A	B	A
GM09:5265332	A	B	A	B	B	A	A	A	A	A	A	A	B	A	A	B	B	B	A	B	B	B	A	A	A	B	A	B	B	B	A	A	A	B	A	B	A	A	B	B	A	A	A	A	B	B	A	B	A
GM09:5267711	A	B	A	B	B	A	A	A	A	A	A	X	B	A	A	B	B	B	A	B	B	B	A	A	A	B	A	B	B	B	A	A	X	X	A	B	A	A	B	B	A	A	A	A	B	B	A	B	A
GM09:5363078	A	B	A	B	B	B	A	A	A	A	A	X	B	A	A	B	B	B	A	B	B	B	A	A	A	B	A	B	B	B	A	A	X	X	A	B	A	A	B	B	B	A	A	A	B	B	A	B	A
GM09:5898756	A	B	A	B	B	B	A	A	A	A	A	A	B	A	A	B	B	B	A	X	A	B	A	A	A	B	A	A	B	B	A	A	A	X	A	A	A	A	B	B	A	A	A	A	B	B	A	B	A
GM09:6045623	A	B	A	B	B	B	A	A	A	A	A	A	B	A	A	B	B	B	A	B	A	B	A	A	A	B	A	A	B	B	A	A	A	A	A	B	A	A	B	B	A	A	A	A	B	B	A	B	A
GM09:6055337	A	B	A	B	B	B	A	A	A	A	A	A	B	A	A	B	B	B	A	B	A	B	A	A	A	B	A	A	B	B	A	A	A	X	A	B	A	A	B	B	A	A	A	A	B	B	A	B	A
GM09:6079061	A	B	A	B	B	B	A	A	A	A	A	A	B	A	A	B	B	B	A	B	A	B	A	A	A	B	A	A	B	B	A	A	A	B	A	B	A	A	B	B	A	A	A	A	B	B	A	B	A
GM09:6263066	A	B	A	B	B	B	A	A	A	A	A	A	B	A	A	B	B	B	A	B	A	B	A	A	A	B	A	A	B	B	A	A	A	B	A	B	A	A	B	B	A	A	A	A	B	B	A	B	A
GM09:6393612	A	B	A	B	B	B	A	A	A	A	A	A	B	A	A	B	B	B	A	B	A	B	A	A	A	B	A	A	B	B	B	A	A	X	A	X	A	A	B	B	A	A	A	A	B	B	A	B	A
GM09:6511413	A	B	A	B	B	B	A	A	A	A	A	A	B	A	A	B	B	B	A	B	A	B	A	A	A	B	A	A	B	B	B	A	A	B	A	B	A	A	B	B	A	A	A	A	B	B	A	B	A
GM09:6620531	A	B	A	B	B	B	A	A	A	A	A	A	B	A	A	B	B	B	A	B	A	B	A	A	A	B	A	A	B	B	B	A	A	B	A	B	A	A	B	B	A	A	A	A	B	B	A	B	A
GM09:6622287	A	B	A	B	B	B	A	A	A	A	A	A	B	A	A	B	B	B	A	B	A	B	A	A	A	B	A	A	B	B	B	A	A	A	A	B	A	A	B	B	A	A	A	A	B	B	A	B	A
GM09:6672375	A	B	A	B	B	B	A	A	A	A	A	A	B	A	A	B	B	B	A	B	A	B	A	A	A	B	A	A	B	B	B	A	A	A	A	B	A	A	B	B	A	A	A	A	B	B	A	B	A
GM09:6684880	A	B	A	B	B	B	A	A	A	A	A	A	B	A	A	B	B	B	A	B	A	B	A	A	A	B	A	A	B	B	B	A	A	B	A	B	A	A	B	B	A	A	A	A	B	B	A	B	A
GM09:6728450	A	B	A	B	B	B	A	A	A	A	A	A	B	A	A	B	B	B	A	B	A	B	A	A	A	B	A	A	B	B	B	A	A	A	A	B	A	A	B	B	A	A	A	A	B	B	A	B	A
GM09:6767206	A	B	A	B	B	B	A	A	A	A	A	A	B	A	A	B	B	B	A	B	A	B	A	A	A	B	A	A	B	B	B	A	A	B	A	B	A	A	B	B	A	A	A	A	B	B	A	B	A
GM09:6800794	A	B	A	B	B	B	A	A	A	A	A	A	B	A	A	B	B	B	A	B	A	B	A	A	A	B	A	A	B	B	B	A	A	A	A	B	A	A	B	B	A	A	A	A	B	B	A	B	A
GM09:6941689	A	B	A	B	B	B	A	A	A	A	A	A	B	A	A	B	B	B	A	B	A	B	A	A	A	B	A	A	B	B	B	A	A	X	A	B	A	A	B	B	A	A	A	A	B	B	A	B	A
GM09:7039103	A	B	A	B	B	B	A	A	A	A	A	A	B	A	A	B	B	X	A	B	A	B	A	A	A	A	A	A	B	B	B	A	A	A	A	A	A	A	B	B	A	A	A	A	B	B	A	B	A
GM09:7111797	B	X	A	B	B	B	A	A	A	A	A	A	B	A	A	B	B	X	A	B	A	A	A	A	A	B	A	A	B	B	B	A	A	B	A	B	A	A	B	B	A	A	B	A	B	B	A	X	A
GM09:7626819	A	A	A	B	B	B	A	A	A	A	A	A	B	A	A	B	B	A	A	B	A	A	A	B	A	B	A	A	B	B	B	A	A	A	A	B	A	A	B	B	A	A	B	A	B	B	A	A	A
GM09:7651539	A	A	A	B	B	B	A	A	A	A	X	A	B	A	A	B	B	A	A	B	A	A	A	A	A	B	A	A	B	B	B	A	A	A	A	B	A	A	B	B	A	A	B	A	B	B	A	A	A
GM09:7784845	A	A	A	B	B	B	A	A	A	A	A	A	B	A	A	B	B	A	A	B	A	A	A	A	B	B	A	A	B	B	B	A	A	B	A	B	A	A	B	B	A	A	B	A	B	B	A	A	A
GM09:7790426	A	A	A	B	B	B	A	A	A	A	A	A	B	A	A	B	B	A	A	B	A	A	A	A	B	B	A	A	B	B	B	A	A	B	A	B	A	A	B	B	A	A	B	A	B	B	A	A	A
GM09:7836036	A	A	A	B	B	B	A	A	A	A	A	A	B	A	A	B	B	A	A	B	A	A	A	A	B	B	A	A	B	B	B	A	A	A	A	B	A	A	B	B	A	A	B	A	B	B	A	A	A
GM09:7836055	A	A	A	B	B	B	A	A	A	A	A	A	B	A	A	B	B	A	A	B	A	A	A	A	B	B	A	A	B	B	B	A	A	A	A	B	A	A	B	B	A	A	B	A	B	B	A	A	A
GM09:7897747	A	A	A	B	B	B	A	A	A	A	A	A	B	A	A	B	B	A	A	B	A	A	A	A	B	B	A	A	B	B	B	A	A	A	A	B	A	A	B	B	A	A	B	A	B	B	A	A	A
GM09:8948814	A	A	A	B	B	B	A	A	A	A	A	A	B	A	A	B	B	A	A	B	A	A	A	A	B	B	A	A	B	B	B	A	A	A	A	B	A	A	B	B	A	A	B	A	B	B	A	A	A
GM09:10624766	A	A	A	B	B	B	A	A	A	A	A	A	B	A	B	B	B	A	A	B	A	A	A	A	B	B	A	A	B	B	B	A	A	B	A	B	A	A	B	B	A	A	B	A	B	B	A	A	A
GM09:10752656	A	A	A	B	B	B	A	A	A	A	A	A	B	A	B	B	B	A	A	B	A	A	A	A	B	B	A	A	B	B	B	A	A	A	A	B	A	A	B	B	A	A	B	A	B	B	A	A	A
GM09:10776085	A	A	A	B	B	B	A	A	A	A	A	A	B	A	B	B	B	B	A	B	A	A	A	A	B	B	A	A	B	B	B	A	A	A	A	B	A	A	B	B	A	A	B	A	B	B	A	A	A
GM09:10815525	A	A	A	B	B	B	A	A	A	A	A	A	B	A	B	B	B	A	A	B	A	A	A	A	B	B	A	A	B	B	B	A	A	X	A	B	A	A	B	X	A	A	B	A	B	B	A	A	A
GM09:10947894	A	A	A	B	B	X	A	A	A	A	A	A	B	A	B	B	B	A	A	B	A	A	A	A	B	B	A	A	B	B	B	A	A	B	A	B	A	A	B	X	A	A	B	A	B	B	A	A	A
GM09:10966710	A	A	A	B	B	B	A	A	A	A	A	A	B	A	B	B	B	A	A	B	A	A	A	A	B	B	A	A	B	B	B	A	A	X	A	B	A	A	B	X	A	A	B	A	B	B	A	A	A
GM09:11079645	A	A	A	B	B	B	A	A	A	A	A	A	B	A	B	B	B	A	A	B	A	A	A	A	B	B	A	A	B	B	B	A	A	B	A	B	A	X	B	X	A	A	B	A	B	B	A	A	A
GM09:11176323	A	A	A	B	B	B	A	A	A	A	A	A	B	A	A	B	B	A	A	B	A	A	A	A	B	B	A	A	B	B	B	A	A	A	A	B	A	A	B	X	A	A	B	A	B	B	A	A	A
GM09:11456206	A	A	A	B	B	B	A	A	A	A	A	A	B	A	B	B	B	A	A	B	A	A	A	A	B	B	A	A	B	B	B	A	A	B	A	B	A	A	B	A	A	A	B	A	B	B	A	A	A
GM09:11456274	A	A	A	B	B	B	A	A	A	A	A	A	B	A	X	B	B	A	A	B	A	A	A	A	B	B	A	A	B	B	B	A	A	A	A	B	A	A	B	A	A	A	B	A	B	B	A	A	A
GM09:11494385	A	A	A	B	B	B	A	A	A	A	A	A	X	A	A	B	B	A	A	B	A	A	A	A	B	B	A	A	B	B	B	A	A	B	A	B	A	A	B	A	A	A	B	A	B	B	A	A	A
GM09:11513213	A	A	A	B	B	B	A	A	A	A	A	A	B	A	X	B	B	A	A	B	A	A	A	A	B	B	A	A	B	B	B	A	A	B	A	B	A	A	B	A	A	A	B	A	B	B	A	A	A
GM09:11601369	A	A	A	B	B	X	A	A	A	A	A	A	B	A	B	B	B	A	A	B	A	A	A	A	B	A	A	A	B	B	B	A	A	A	A	B	A	A	B	A	A	A	B	A	B	B	A	A	A
GM09:11725835	A	A	A	B	B	B	A	A	A	A	A	A	B	A	B	B	B	A	A	B	A	A	A	A	B	B	A	A	B	B	B	A	A	A	A	B	A	A	B	A	A	A	B	A	B	B	A	A	A
GM09:11751683	A	A	A	B	B	B	A	A	A	A	A	A	B	A	X	B	B	A	A	B	A	A	A	A	B	B	A	A	B	B	B	A	A	A	A	B	A	A	B	A	A	A	B	A	B	B	A	A	A
GM09:11930456	A	A	A	B	B	B	A	A	A	A	A	A	B	A	B	B	B	A	A	B	A	A	A	A	B	B	A	A	B	B	B	A	A	A	A	B	A	A	B	A	A	A	B	A	B	B	A	A	A
GM09:13529567	B	A	A	B	A	B	A	A	A	A	A	B	A	A	A	A	B	B	A	A	B	A	B	A	B	A	A	B	A	A	B	A	B	B	B	B	A	A	A	B	B	A	A	B	B	B	B	B	A
GM09:13626238	B	A	A	B	A	B	A	A	A	A	A	B	A	A	A	A	B	B	A	A	B	A	B	A	B	A	A	B	A	A	B	A	B	B	B	B	A	A	A	B	B	A	A	B	B	B	B	B	X
GM09:14029019	B	A	A	B	A	B	A	A	A	A	X	B	A	A	A	A	B	B	A	A	B	A	B	A	B	A	A	B	A	A	B	A	B	B	B	B	A	A	A	B	B	A	A	B	B	B	A	B	A
GM09:14550566	A	A	A	B	B	B	A	A	A	A	A	A	B	A	B	B	B	A	A	B	A	A	A	A	B	B	A	A	B	B	B	A	A	A	A	B	A	A	B	A	A	A	B	A	B	B	A	A	A
GM09:19762316	A	B	B	A	B	A	A	A	B	B	B	A	A	B	B	B	B	B	X	B	B	B	B	B	B	A	A	B	B	A	B	A	B	B	A	A	A	A	A	A	B	A	A	A	A	B	A	B	B
GM09:19806426	A	B	B	A	B	A	A	A	B	B	B	A	A	B	B	B	B	B	X	B	B	B	B	B	B	A	A	B	B	A	B	A	B	B	A	A	A	A	A	A	B	A	A	A	A	B	A	B	B
GM09:20028845	A	B	B	A	B	A	A	A	B	B	B	A	A	B	B	B	B	B	X	B	B	B	B	B	B	A	A	B	B	A	B	A	B	B	A	A	A	A	A	A	B	A	A	A	A	B	A	B	B
GM09:21609916	A	A	A	B	B	B	A	A	A	A	A	A	B	A	X	B	B	A	A	B	A	A	A	A	B	B	A	A	B	B	B	A	A	A	A	B	A	A	B	A	A	A	B	A	B	B	A	A	A
GM09:21614901	A	A	A	B	B	B	A	A	A	A	A	A	B	A	B	B	B	A	A	B	A	A	A	A	B	B	B	A	B	B	B	A	A	X	A	B	A	A	B	A	B	A	B	A	B	B	A	A	A
GM09:22153001	A	A	A	B	B	B	A	A	A	A	A	A	B	A	X	B	B	A	A	B	A	A	A	A	B	A	X	A	B	B	B	A	A	B	A	B	A	A	B	A	B	A	B	A	B	B	A	A	A
GM09:22153033	A	A	A	B	B	B	A	A	A	A	A	A	B	A	X	B	B	A	A	B	A	A	A	A	B	A	A	A	B	B	B	A	A	B	A	B	A	A	B	A	A	A	B	A	B	B	A	A	A
GM09:24367006	A	A	A	B	B	B	A	A	A	A	A	A	B	A	X	B	B	A	A	B	A	A	A	A	B	B	A	A	B	B	B	A	A	A	A	B	A	A	B	A	A	A	B	A	B	B	A	A	A
GM09:24927659	A	A	A	B	B	B	A	A	A	A	A	A	B	A	X	B	B	A	A	B	A	A	A	A	B	B	A	A	B	B	B	A	A	X	A	B	A	A	B	A	A	A	B	A	B	B	A	A	A
GM09:25167410	A	A	A	B	B	B	A	A	A	A	X	A	B	A	B	B	B	A	A	B	A	A	A	A	B	B	B	A	B	B	B	A	A	X	A	B	A	A	B	A	B	A	B	A	B	B	A	A	A
GM09:28485985	A	A	A	B	B	B	A	A	A	A	X	A	B	A	B	B	B	A	A	B	A	A	A	A	B	B	B	A	A	B	B	A	A	X	A	B	A	A	B	A	B	A	B	A	B	B	A	A	A
GM09:28486029	A	A	A	B	B	B	A	A	A	A	B	A	B	A	B	B	B	A	A	B	A	A	A	A	B	B	B	A	B	B	B	A	A	B	A	B	A	A	B	A	B	A	B	A	B	B	A	A	A
GM09:28487819	A	A	A	B	B	B	A	A	A	A	X	A	B	A	B	B	B	A	A	B	A	A	A	A	B	B	B	A	B	B	B	A	A	A	A	B	A	A	B	A	B	A	B	A	B	B	A	A	A
GM09:28490084	B	A	A	B	B	B	A	A	A	A	B	A	B	A	B	B	B	A	A	B	A	A	A	A	B	B	B	A	B	B	B	A	A	B	A	B	A	A	B	A	B	A	B	A	B	B	A	A	A
GM09:28562654	A	A	A	B	B	B	A	A	A	A	X	A	B	A	X	B	B	A	A	B	A	A	A	A	B	B	A	A	B	B	B	A	A	A	A	B	A	A	B	A	B	A	B	A	B	B	A	A	A
GM09:28636911	A	A	A	B	B	B	A	A	A	A	X	A	B	A	X	B	B	A	A	B	A	A	A	A	B	B	X	A	B	B	B	A	A	X	A	B	A	A	B	A	B	A	B	A	B	B	A	A	A
GM09:28651941	A	A	A	B	B	B	A	A	A	A	B	A	B	A	B	B	B	A	A	B	A	A	A	A	B	B	B	A	B	B	B	A	A	B	A	B	A	A	B	A	B	A	B	A	B	B	A	A	A
GM09:28677066	A	A	A	B	B	B	A	A	A	A	B	A	B	A	X	B	B	A	A	B	A	A	A	A	B	B	B	A	B	B	B	A	A	B	A	B	A	A	B	A	B	A	B	A	B	B	A	A	A
GM09:28684050	A	A	A	B	B	B	A	A	A	A	B	A	B	A	X	B	B	A	A	B	A	A	A	A	B	B	B	A	B	B	B	A	A	B	A	B	A	A	B	A	B	A	B	A	B	B	A	A	A
GM09:28697985	A	A	A	B	B	B	A	A	A	A	B	A	B	A	X	B	B	A	A	B	A	A	A	A	B	B	B	A	B	B	B	A	A	B	A	B	A	A	B	A	B	A	B	A	B	B	A	A	A
GM09:28697995	A	A	A	B	B	B	A	A	A	A	B	A	B	A	X	B	B	A	A	B	A	A	A	A	B	B	B	A	B	B	B	A	A	B	A	B	A	A	B	A	B	A	B	A	B	B	A	A	A
GM09:28698006	A	A	A	B	B	B	A	A	A	A	B	A	B	A	X	B	B	A	A	B	A	A	A	A	B	B	B	A	B	B	B	A	A	B	A	B	A	A	B	A	B	A	B	A	B	B	A	A	A
GM09:28716137	A	A	A	B	B	B	A	A	A	A	B	A	B	A	B	B	B	A	A	B	A	A	A	A	B	B	B	A	B	B	B	A	A	B	A	B	A	A	B	A	B	A	B	A	B	B	A	A	A
GM09:28735233	A	A	A	B	B	B	A	A	A	A	B	A	B	A	B	B	B	A	A	B	A	A	A	A	B	B	A	A	B	B	B	A	A	B	A	B	A	A	B	A	B	A	B	A	B	B	A	A	A
GM09:28735333	A	A	A	B	B	B	A	A	A	A	B	A	B	A	B	B	B	A	A	B	A	A	A	A	B	B	B	A	B	B	B	A	A	B	A	A	A	A	B	A	B	A	B	A	B	B	A	A	A
GM09:28735383	A	A	A	B	B	B	A	A	A	A	B	A	B	A	B	B	B	A	A	B	A	A	A	A	B	B	B	A	B	B	B	A	A	B	A	A	A	A	B	A	B	A	B	A	B	B	A	A	A
GM09:28761437	A	A	A	B	B	B	A	A	A	A	B	A	B	A	X	B	B	A	A	B	A	A	A	A	B	B	B	A	B	B	B	A	A	A	A	B	A	A	B	A	B	A	B	A	B	B	A	A	A
GM09:28832425	A	A	A	B	B	B	A	A	A	A	B	A	B	A	B	B	B	A	A	B	A	A	A	A	B	B	B	A	B	B	B	A	A	B	A	B	A	A	B	A	B	A	B	A	B	B	A	A	A
GM09:28873191	A	A	A	B	B	B	A	A	A	A	B	A	B	A	B	B	B	A	A	B	A	A	A	A	B	B	B	A	B	B	B	A	A	B	A	B	A	A	B	A	B	A	B	A	B	B	A	A	A
GM09:28881785	A	A	A	B	B	B	A	A	A	A	B	A	B	A	A	B	B	A	A	B	A	A	A	A	B	B	B	A	B	B	B	A	A	B	A	B	A	A	B	A	B	A	B	A	B	B	A	A	A
GM09:29194886	A	A	A	B	B	B	A	A	A	A	B	A	B	A	A	B	B	A	A	B	A	A	A	A	B	B	B	A	B	B	B	A	A	B	A	B	A	A	B	A	B	A	B	A	B	B	A	A	A
GM09:29199037	A	A	A	B	B	B	A	A	A	A	X	A	B	A	A	B	B	A	A	B	A	A	A	A	B	B	B	A	B	B	B	A	A	B	A	B	A	A	B	A	B	A	B	A	A	B	A	A	A
GM09:29695078	A	A	A	B	B	B	A	A	A	A	X	A	B	A	B	B	B	A	A	B	A	A	A	A	B	B	A	A	B	B	B	A	A	B	A	B	A	A	B	A	B	A	B	A	B	B	A	A	A
GM09:30572965	A	A	A	B	B	B	A	A	A	A	X	A	B	A	B	B	B	A	A	B	A	A	A	A	B	B	X	A	B	B	B	A	A	X	A	B	A	A	B	A	B	A	B	A	B	B	A	A	A
GM09:30655795	A	A	A	B	B	B	A	A	A	A	X	A	B	A	B	B	B	A	A	B	A	A	A	A	B	B	X	A	B	B	B	A	A	X	A	B	A	A	B	A	B	A	B	A	B	B	A	A	A
GM09:30815699	A	A	A	B	B	B	A	A	A	A	A	A	B	A	A	B	B	A	A	B	A	A	A	A	B	B	A	A	B	B	B	A	A	X	A	B	A	A	B	A	B	A	B	A	B	B	A	A	A
GM09:30891001	A	A	A	B	B	B	A	A	A	A	A	A	B	A	A	B	B	A	A	B	A	A	A	A	B	B	A	A	A	B	B	A	A	X	A	B	A	A	B	A	B	A	B	A	B	B	A	A	A
GM09:30988295	A	A	A	B	B	B	A	A	A	A	B	A	B	A	B	B	B	A	A	B	A	A	A	A	B	B	X	A	B	B	B	A	A	X	A	B	A	A	B	A	B	A	B	A	B	B	A	A	A
GM09:30988978	A	A	A	B	B	B	A	A	A	A	X	A	B	A	A	B	B	A	A	B	A	A	A	A	B	B	A	A	B	B	B	A	A	B	A	B	A	A	B	A	X	A	B	A	B	B	A	A	A
GM09:31108765	A	A	A	B	B	B	A	A	A	A	B	A	B	A	B	B	B	A	A	B	A	A	A	A	B	B	X	A	B	B	B	A	A	B	A	B	A	A	B	A	A	A	B	A	B	B	A	A	A
GM09:31109277	A	A	A	B	B	B	A	A	A	A	B	A	B	A	B	B	B	A	A	B	A	A	A	A	B	B	X	A	B	B	B	A	A	B	A	B	A	A	B	A	A	A	B	A	B	B	A	A	A
GM09:31204755	A	A	A	B	B	B	A	A	A	A	A	A	B	A	B	B	B	A	A	B	A	A	A	A	B	B	A	A	B	B	B	A	A	B	A	B	A	A	B	A	A	A	B	A	B	B	A	A	A
GM09:31206649	A	A	A	B	B	B	A	A	A	A	A	A	B	A	B	B	B	A	A	B	A	A	A	A	B	A	A	A	B	B	B	A	A	B	A	B	A	A	B	A	A	A	B	A	B	B	A	A	A
GM09:32109322	A	A	A	B	B	B	A	A	A	A	B	A	B	A	B	B	B	A	A	B	A	A	A	A	B	B	X	A	B	B	B	A	A	B	A	B	A	A	B	A	A	A	B	A	B	B	A	A	A
GM09:32357287	A	A	A	B	B	B	A	A	A	A	X	A	B	A	B	B	B	A	A	B	A	A	A	A	B	B	X	A	B	B	B	A	A	A	A	B	A	A	B	A	A	A	B	A	B	B	A	A	A
GM09:32363897	A	A	A	B	B	B	A	A	A	A	A	A	A	A	B	B	B	A	A	B	A	A	A	A	B	B	X	A	B	B	B	A	A	B	A	B	A	A	B	A	A	A	B	A	B	B	A	A	A
GM09:32363930	A	A	A	B	B	B	A	A	A	A	A	A	A	A	B	B	B	A	A	B	A	A	A	A	B	B	X	A	B	B	B	A	A	B	A	B	A	A	B	A	A	A	B	A	B	B	A	A	A
GM09:32392571	A	A	A	B	B	B	A	A	A	A	A	A	B	A	B	B	B	A	A	B	A	A	A	A	B	B	X	A	B	B	B	A	A	B	A	B	A	A	B	A	A	A	B	A	B	B	A	A	A
GM09:32483150	A	A	A	B	B	B	A	A	A	A	A	A	B	A	B	B	B	A	A	B	A	A	A	A	A	B	X	A	B	B	B	A	A	B	A	B	A	A	B	A	A	A	B	A	B	B	A	A	A
GM09:32514761	A	A	A	B	B	B	A	A	A	A	A	A	B	A	B	B	B	A	A	B	A	A	A	A	A	B	X	A	B	B	B	A	A	B	A	B	A	A	B	A	A	A	B	A	B	B	A	A	A
GM09:32604674	A	A	A	B	B	B	A	A	A	A	A	A	B	A	B	B	B	A	A	B	A	A	A	A	A	B	X	A	B	B	B	A	A	B	A	B	A	A	B	A	A	A	B	A	B	B	A	A	A
GM09:32634802	A	A	A	B	B	B	A	A	A	A	A	A	B	A	B	B	B	A	A	B	A	A	A	A	A	B	X	A	B	B	B	A	A	B	A	B	A	A	B	A	B	A	B	A	B	B	A	A	A
GM09:32646719	A	A	A	B	B	B	A	A	A	A	A	A	B	A	B	B	B	A	A	B	A	A	A	A	A	B	X	A	B	B	B	A	A	B	A	B	A	A	B	A	A	A	B	A	B	B	A	A	A
GM09:32822073	A	A	A	B	B	B	A	A	A	A	A	A	X	A	X	B	B	A	A	B	A	A	A	A	A	A	X	A	B	B	B	A	A	X	A	B	A	A	B	A	A	A	B	A	A	B	A	A	A
GM09:32832831	A	A	A	B	B	B	A	A	A	A	A	A	B	A	B	B	B	A	A	B	A	A	A	X	A	B	B	A	B	B	B	A	A	B	A	B	A	A	B	A	A	A	B	A	B	B	A	A	A
GM09:33561287	A	A	A	B	B	B	A	A	A	A	A	A	A	A	B	B	B	A	A	B	A	A	A	X	A	X	B	A	B	B	B	A	A	B	A	B	A	A	B	A	A	A	B	A	B	B	A	A	A
GM09:33564820	A	A	A	B	B	B	A	A	A	A	A	A	X	A	B	B	B	A	A	B	A	A	A	X	A	A	B	A	B	B	B	A	A	X	A	B	A	A	B	A	A	A	B	X	X	B	A	A	A
GM09:33588385	A	A	A	B	B	B	A	A	A	A	A	A	B	A	B	B	B	A	A	B	A	A	A	X	A	B	B	A	B	B	B	A	A	B	A	B	A	A	B	A	A	A	B	B	B	B	A	A	A
GM09:33588456	A	A	A	B	B	B	A	A	A	A	A	A	B	A	B	B	B	A	A	B	A	A	A	X	A	B	B	A	B	B	B	A	A	B	A	B	A	A	B	A	A	A	B	A	B	B	A	A	A
GM09:33631167	A	A	A	B	B	B	A	A	A	A	A	A	A	A	B	B	B	A	A	B	A	A	A	X	A	A	B	A	B	B	B	A	A	X	A	B	A	A	B	A	A	A	B	X	B	X	A	A	A
GM09:33924021	A	A	A	B	B	B	A	A	A	A	A	A	B	A	B	A	B	A	A	B	B	A	A	X	A	B	B	A	B	B	B	A	A	B	A	B	A	A	B	A	A	A	B	X	B	B	A	A	A
GM09:33924231	A	A	A	B	B	B	A	A	A	A	A	A	A	A	B	B	B	A	A	B	A	A	A	X	A	B	B	A	B	B	B	A	A	X	A	B	A	A	B	A	A	A	B	B	B	B	A	A	A
GM09:33937720	A	A	A	B	B	B	A	A	A	A	A	A	A	A	X	X	B	A	A	B	A	A	A	X	A	A	B	A	B	B	B	A	A	A	A	B	A	A	B	A	A	A	B	X	B	B	A	A	A
GM09:33971428	A	A	A	B	B	B	A	A	A	A	A	A	B	A	B	B	B	A	A	B	A	A	A	B	A	A	B	A	B	B	B	A	A	X	A	B	A	A	B	A	A	A	B	X	B	B	A	A	A
GM09:33990878	A	A	A	B	B	B	A	A	A	A	A	A	A	A	A	X	B	A	A	B	A	A	A	B	A	A	B	A	B	B	B	A	A	X	A	B	A	A	B	A	A	A	B	B	B	B	A	A	A
GM09:34060804	A	A	A	B	B	B	A	A	A	A	A	A	A	A	B	X	B	A	A	B	A	A	A	B	A	A	B	A	B	B	B	A	A	B	A	B	A	A	B	A	X	A	B	X	B	B	A	A	A
GM09:34116171	A	A	A	B	B	B	A	A	A	A	A	A	A	A	X	X	B	A	A	B	A	A	A	X	A	A	B	A	B	B	B	A	A	A	A	B	A	A	B	A	B	A	B	A	B	B	A	A	A
GM09:34117683	A	A	A	B	B	B	A	A	A	A	A	A	A	A	A	X	B	A	A	B	A	A	A	B	A	B	B	A	B	B	B	A	A	B	A	B	A	A	B	A	X	A	B	B	B	B	A	A	A
GM09:35896566	A	A	A	B	B	B	A	A	A	A	A	B	A	A	A	A	B	A	A	B	A	A	A	B	A	A	B	A	B	B	B	A	A	X	B	B	A	A	B	A	X	A	B	A	B	B	B	A	A
GM09:35896653	A	A	A	B	B	B	A	A	A	A	A	B	A	A	A	A	B	A	A	B	A	A	A	B	A	A	B	A	B	B	B	A	A	X	B	B	A	A	B	A	X	A	B	A	B	B	B	A	A
GM09:35942193	A	A	A	B	B	B	A	A	A	A	A	B	A	A	A	A	B	A	A	B	A	A	A	B	A	A	B	A	B	B	B	A	A	B	B	X	A	A	B	A	X	A	B	A	B	B	B	A	A
GM09:36044263	A	A	A	B	B	B	A	A	A	A	A	B	A	A	A	A	B	A	A	B	A	A	A	B	A	A	B	A	B	B	B	A	A	A	B	B	A	A	B	A	X	A	B	A	B	B	B	A	A
GM09:36044286	A	A	A	B	B	B	A	A	A	A	A	B	A	A	X	A	B	A	A	B	A	A	A	B	A	A	B	A	B	B	B	A	A	B	B	B	A	A	B	A	X	A	B	A	B	B	B	A	A
GM09:36103363	A	A	A	B	B	B	A	A	A	A	A	B	A	A	A	A	B	A	A	B	A	A	A	B	A	A	B	A	B	B	B	A	A	A	B	B	A	A	B	A	X	A	B	A	B	B	B	A	A
GM09:37065022	A	A	A	B	B	B	A	A	A	A	A	B	A	A	B	X	B	A	A	B	A	A	A	B	A	A	B	A	B	B	B	A	A	B	B	B	A	A	B	A	A	A	B	A	B	B	B	A	B
GM09:37476846	A	A	A	B	B	B	A	A	A	A	A	B	A	A	B	X	B	A	A	B	A	A	A	B	A	A	B	A	B	B	B	A	A	A	B	B	A	A	B	A	A	A	B	A	B	B	B	A	X
GM09:37703659	A	A	A	B	B	B	A	A	A	A	A	B	A	A	B	X	B	A	A	B	A	A	A	B	A	A	B	A	B	B	B	A	A	B	B	B	A	A	X	A	A	A	B	A	B	B	B	A	A
GM09:37870696	A	A	A	B	B	B	A	A	A	A	A	B	A	A	B	B	B	A	A	B	A	A	A	B	A	A	B	A	B	B	B	A	A	B	B	B	A	A	A	A	A	A	B	A	B	B	B	A	A
GM09:38012787	A	A	A	B	B	B	A	A	A	A	A	B	A	A	B	B	B	A	A	B	A	A	A	B	A	A	B	A	B	B	B	A	A	B	B	B	A	A	A	A	A	A	B	X	B	B	B	A	B
GM09:39874751	B	A	A	B	B	B	A	A	A	A	X	X	B	A	A	A	B	A	B	B	X	A	A	X	A	A	B	B	B	B	B	A	B	X	B	B	A	A	A	A	A	A	A	B	B	A	B	A	B
GM09:39936568	B	B	A	B	B	B	A	A	A	A	A	X	A	A	A	A	B	A	B	B	X	A	A	A	A	A	B	B	B	B	B	A	B	A	B	B	A	A	A	A	A	A	A	B	B	A	B	A	X
GM09:40078265	B	B	A	B	B	B	A	A	A	A	X	X	A	A	A	A	B	A	B	B	X	A	A	A	A	A	B	B	B	B	B	A	B	A	B	B	A	A	A	A	A	A	A	B	B	A	B	A	A
GM09:40496435	B	A	A	B	B	B	A	A	A	A	B	X	A	A	B	A	B	A	B	B	X	A	A	A	A	A	B	B	X	B	B	A	B	A	B	B	A	A	A	A	A	A	A	X	B	A	B	A	B
GM09:40621411	B	A	A	B	B	B	A	A	A	A	B	X	A	A	B	A	B	A	B	B	X	A	A	A	A	A	B	B	A	B	B	A	B	A	B	B	A	A	A	A	A	A	A	A	B	A	B	A	A
GM09:40737772	B	A	A	B	B	B	A	A	A	A	B	X	A	A	B	A	B	A	B	B	X	A	A	A	A	A	B	B	A	B	B	A	B	A	B	B	A	A	A	A	A	A	A	A	B	A	B	A	A
GM09:40848204	B	A	A	B	B	B	A	A	A	A	B	X	A	A	B	A	B	A	B	B	A	A	A	A	A	A	B	B	A	B	B	A	B	A	B	B	A	A	A	A	A	A	A	X	B	A	B	A	X
GM09:40861582	B	A	A	B	B	B	A	A	A	A	B	X	A	A	B	A	B	A	B	B	A	A	A	A	A	A	B	B	A	B	B	A	B	A	B	B	A	A	A	A	A	A	A	X	B	A	B	A	A
GM09:41183655	B	B	A	B	B	B	A	A	A	A	B	X	X	A	B	A	B	A	B	B	A	A	A	A	A	A	B	B	X	A	B	A	B	X	B	B	A	A	A	A	A	A	A	X	B	A	B	A	B
GM09:47649646	B	A	B	B	A	B	B	A	B	B	A	B	A	A	B	B	A	A	A	B	A	B	B	B	A	B	A	B	B	A	A	B	A	B	B	B	A	A	A	A	B	B	B	B	B	B	B	A	A
GM09:47683665	B	A	B	B	A	X	B	A	B	B	A	B	A	A	B	B	A	A	A	B	A	B	A	B	A	B	A	B	B	A	A	B	A	B	B	B	A	A	A	A	X	B	B	B	B	B	B	A	A
GM09:47925267	B	A	B	B	B	X	B	A	X	B	A	A	A	A	B	A	A	A	A	B	A	B	B	B	A	B	A	B	B	A	A	B	A	B	A	B	A	X	A	B	X	B	B	B	B	B	B	A	A
GM09:47971472	B	A	B	A	B	X	B	A	X	B	A	A	A	A	B	A	A	A	A	B	A	B	B	B	A	B	A	B	B	A	A	B	A	B	A	X	A	X	A	B	X	B	B	B	B	B	B	A	A
GM09:48014096	B	A	B	A	B	X	B	A	A	B	A	A	A	A	B	A	A	B	A	B	A	B	B	B	A	B	A	B	B	A	A	B	A	B	A	B	A	X	A	B	A	B	B	B	B	B	B	A	A
GM09:48195030	B	A	B	B	B	X	B	A	X	B	A	A	A	A	B	A	A	A	A	B	A	B	B	B	A	B	A	B	B	A	A	B	A	B	A	B	A	A	A	B	A	B	B	B	B	B	B	A	A
GM09:48316098	B	A	B	X	B	B	B	A	X	B	A	A	A	A	B	A	A	A	A	B	A	B	B	B	A	B	A	B	B	A	A	B	A	B	A	A	A	X	A	B	X	B	B	B	B	B	B	A	A
GM09:48326481	B	A	B	X	B	X	B	A	A	B	A	A	A	A	B	A	A	A	A	B	A	B	B	B	A	B	A	B	B	A	A	B	A	B	A	A	A	A	A	B	X	B	B	B	B	B	B	A	A
GM09:48336284	B	A	B	A	B	X	B	A	A	B	A	A	A	A	B	A	A	A	A	B	A	B	A	B	A	B	A	B	B	A	A	B	A	B	A	A	A	A	A	B	A	B	B	B	B	B	B	A	A
GM09:48361193	B	A	B	A	B	X	B	A	X	B	A	A	A	A	B	A	A	X	A	B	A	B	B	B	A	B	A	B	B	A	A	B	A	B	A	A	A	A	A	B	B	B	B	B	B	B	B	A	A
GM09:48437955	B	A	B	A	B	X	B	A	A	B	A	A	A	A	B	A	A	A	A	B	A	B	A	B	A	B	A	B	B	A	A	B	A	B	A	A	A	A	A	X	A	B	B	B	X	B	B	A	A
GM09:48481394	B	A	B	B	B	B	B	A	X	B	A	A	A	A	B	A	A	X	A	B	A	B	B	B	A	B	A	B	B	A	A	B	A	B	A	A	A	X	A	B	B	B	B	X	B	B	B	A	A
GM09:48493709	B	A	B	A	B	A	B	A	B	B	A	A	A	A	B	A	A	A	A	B	A	B	A	B	A	B	A	B	B	A	A	B	A	B	A	A	A	A	A	B	A	B	B	X	B	B	B	A	A
GM09:48559995	B	A	B	A	B	X	B	A	B	B	A	A	A	A	B	A	A	A	A	B	A	B	B	B	A	B	A	B	B	A	A	B	A	B	A	A	A	A	A	B	X	B	B	B	X	B	B	A	A
GM09:48640360	B	A	B	X	B	X	B	A	B	B	A	A	A	A	B	A	A	A	A	B	A	B	B	B	A	B	A	X	B	X	A	B	A	B	A	A	A	A	A	B	A	B	B	B	B	B	B	A	A
GM09:48665322	B	A	B	B	B	A	B	A	B	B	A	A	A	A	B	A	A	X	A	B	A	B	A	B	A	B	A	B	B	A	A	B	A	B	A	A	A	X	A	B	X	B	B	B	B	B	B	A	A
GM09:48774981	B	A	B	X	B	A	B	A	B	B	A	A	A	A	B	A	A	A	A	B	A	B	B	B	A	B	A	B	B	A	A	B	A	B	A	A	A	A	A	B	X	B	B	B	X	B	B	A	A
GM09:49035318	B	B	B	X	B	B	B	A	B	B	A	A	A	A	X	A	A	A	A	X	A	B	B	B	A	B	A	B	B	A	A	B	A	B	A	A	A	A	A	A	A	B	B	B	X	X	B	A	A
GM09:49057956	B	B	B	X	B	B	B	A	B	B	A	A	A	A	X	A	A	A	A	X	X	B	A	B	A	B	B	B	B	A	A	B	A	B	A	A	A	A	A	A	A	B	B	B	X	A	B	A	A
GM09:49058194	B	B	B	B	X	X	B	A	B	B	A	A	A	A	X	A	A	B	A	B	A	B	B	B	A	B	A	B	X	A	A	B	A	B	A	A	A	X	A	B	B	B	B	B	X	A	B	A	A
GM09:49272495	B	B	B	A	B	A	B	A	B	B	A	A	A	A	A	A	A	A	A	B	A	B	B	B	A	B	A	B	A	A	A	B	A	B	A	A	A	A	A	B	A	B	B	B	A	A	B	A	A
GM09:49279854	B	B	B	B	B	B	B	A	B	B	A	A	A	A	X	A	A	X	A	B	A	B	B	B	A	B	A	B	A	A	A	B	A	B	A	A	A	A	A	B	X	B	B	B	X	A	B	A	A
GM09:49591394	B	B	B	B	B	A	B	A	B	B	A	A	A	A	B	A	B	B	A	B	A	B	B	B	A	B	X	B	A	A	A	B	A	B	A	A	A	A	A	B	B	B	B	B	X	X	B	A	A
GM09:49767153	B	B	B	B	B	X	B	X	B	B	A	A	A	A	A	A	B	B	A	B	A	B	B	B	A	B	A	B	A	A	A	B	A	B	A	A	A	A	A	B	A	B	B	B	X	A	B	A	A
GM09:49775019	B	B	B	B	B	B	B	X	B	B	A	A	A	A	A	A	B	B	A	B	A	B	B	B	A	B	X	B	A	A	A	B	A	B	A	A	A	X	A	B	A	B	B	B	X	X	B	A	A
GM09:50017026	B	B	B	B	B	X	B	X	B	B	A	A	A	A	B	A	B	B	A	B	A	B	B	B	A	B	X	B	A	A	B	B	A	B	A	A	A	A	A	B	A	B	B	B	A	X	B	A	A
GM09:50017040	B	B	B	B	B	X	B	B	B	B	A	A	A	A	B	A	B	B	A	B	A	B	B	B	A	B	X	B	A	A	B	B	A	B	A	A	A	A	A	B	B	B	B	B	A	X	B	A	A
GM09:50096564	B	B	B	X	B	A	B	X	B	B	A	A	A	A	X	A	A	A	A	B	A	B	B	B	A	B	X	B	A	A	B	B	A	B	A	A	X	A	A	B	A	B	B	B	X	A	B	A	A
GM09:50165907	B	B	B	B	B	X	B	X	B	B	A	A	A	A	A	A	B	B	A	B	A	B	B	B	A	B	B	B	X	A	B	B	A	B	A	A	B	A	A	B	B	B	B	B	X	A	B	A	A
GM10:58076	A	B	B	A	B	B	A	A	A	A	B	A	A	A	B	B	B	A	B	B	A	X	A	B	B	B	A	A	B	A	B	X	A	A	B	A	A	A	B	A	A	B	B	A	A	A	A	A	B
GM10:185852	A	B	B	A	B	B	A	A	A	A	B	A	A	A	B	B	B	A	B	B	A	X	A	B	B	B	B	A	B	A	B	A	A	A	B	A	A	A	B	A	A	B	B	A	A	A	A	A	B
GM10:188957	A	B	B	A	B	B	A	A	A	A	B	A	A	A	B	B	B	A	B	B	A	B	A	B	B	B	B	A	X	A	B	B	A	A	B	A	A	A	B	A	A	B	B	A	A	A	A	A	B
GM10:223363	A	B	B	A	B	B	A	A	A	A	B	A	A	A	B	B	B	A	B	B	A	B	A	B	B	B	A	A	A	A	B	B	A	A	B	A	A	A	B	A	A	B	B	A	A	A	A	A	B
GM10:259448	A	B	B	A	B	B	A	A	A	A	B	A	A	A	B	B	B	A	B	B	A	X	A	B	B	B	A	A	A	A	B	B	A	A	B	A	A	A	B	A	A	B	B	A	A	A	A	A	B
GM10:1462978	A	A	A	A	B	B	A	A	A	A	B	A	A	A	B	B	A	X	B	B	B	B	B	B	X	B	A	A	A	A	B	A	A	A	A	A	A	A	B	A	A	A	B	A	A	B	A	B	B
GM10:1519431	A	A	B	A	B	B	A	A	A	A	B	A	X	A	B	B	X	X	B	B	B	B	B	B	X	B	B	A	A	A	B	A	A	A	B	A	A	A	B	A	A	A	B	A	A	B	A	B	B
GM10:1595239	A	A	A	A	B	B	A	A	A	A	B	A	A	A	B	B	A	B	B	B	B	B	B	B	A	B	A	A	A	A	B	A	A	A	A	A	A	A	B	A	A	A	B	A	A	B	A	X	B
GM10:1924466	A	A	A	A	B	B	A	A	A	B	B	A	A	A	B	B	X	B	B	B	B	B	B	B	A	B	X	A	A	A	B	A	A	A	A	A	A	A	B	A	A	A	B	A	A	B	A	X	B
GM10:1942283	A	A	A	A	B	B	A	A	A	B	B	A	X	A	B	B	X	B	B	B	B	B	B	B	A	B	X	A	A	A	B	A	B	A	A	A	A	A	B	A	A	A	B	A	A	B	A	X	B
GM10:1942397	A	A	X	A	B	B	A	A	A	B	B	A	X	A	B	B	X	X	B	B	B	B	B	B	A	B	X	A	A	A	B	A	B	A	A	A	A	A	B	A	A	A	B	A	A	B	A	X	B
GM10:2084913	A	A	B	B	X	B	A	A	A	B	B	A	B	A	B	B	X	B	B	B	B	B	B	B	A	B	B	A	A	A	B	A	B	A	A	A	A	A	B	A	A	A	B	A	A	B	A	A	B
GM10:2270537	A	A	B	B	B	B	A	A	A	B	B	A	B	A	B	B	X	B	A	B	B	B	B	B	A	B	X	A	A	A	B	A	B	A	A	A	A	A	B	A	A	A	B	A	A	B	A	X	B
GM10:2290911	A	A	A	B	B	B	A	A	A	B	B	A	B	A	B	B	A	X	A	B	B	B	B	B	A	B	X	A	A	A	B	A	B	A	A	A	A	A	B	A	A	A	B	A	A	B	A	A	B
GM10:2373998	A	A	B	B	B	B	A	A	A	B	B	B	B	A	B	B	B	X	A	B	X	B	B	B	A	B	A	A	A	A	B	A	B	A	B	A	A	A	B	A	A	A	B	A	A	B	A	A	B
GM10:2374407	A	A	B	B	B	B	A	A	A	B	B	B	B	A	B	B	B	X	A	B	X	B	B	B	A	B	X	A	A	A	B	A	B	A	B	A	A	A	B	A	A	A	B	A	A	A	A	A	B
GM10:2529625	A	A	B	B	B	B	A	A	A	B	B	B	B	A	B	B	B	X	A	B	A	B	B	B	A	B	A	A	A	A	B	A	B	A	B	A	A	A	B	A	A	A	B	A	A	B	A	X	B
GM10:2545232	A	A	B	B	B	B	A	A	A	B	B	B	B	A	B	B	B	X	A	B	X	B	B	B	A	B	X	A	A	A	B	A	B	A	B	A	A	A	B	A	A	A	B	A	A	X	A	X	B
GM10:2604478	A	A	B	B	B	B	A	A	A	B	B	B	B	A	B	B	B	A	A	B	B	B	B	B	A	B	X	A	A	A	B	A	B	A	B	A	A	A	B	A	A	A	B	A	A	A	A	A	B
GM10:2629415	A	A	B	B	B	B	A	A	A	B	B	B	B	A	B	B	B	A	A	B	B	B	B	B	A	B	B	A	A	A	B	A	B	A	B	A	A	A	B	A	A	A	B	A	A	A	A	A	B
GM10:2705636	A	A	B	B	B	B	A	A	A	B	B	B	X	A	B	B	B	A	A	B	A	B	B	B	A	B	B	A	A	A	B	A	B	A	B	A	A	A	B	A	A	A	B	A	A	A	A	A	B
GM10:2818385	A	A	B	B	B	B	A	A	A	B	B	B	B	A	B	B	B	A	A	B	A	B	B	B	A	B	B	A	A	A	B	A	B	A	B	A	A	A	B	A	A	A	B	A	A	A	A	A	B
GM10:2895476	A	A	B	B	B	B	A	A	A	B	B	B	B	A	B	B	B	A	A	B	A	B	B	B	A	B	B	A	A	A	B	A	B	A	B	A	A	A	B	A	A	A	B	A	A	A	A	A	B
GM10:2895618	A	A	B	B	B	B	A	A	A	B	B	B	B	A	B	B	B	A	A	B	B	B	B	B	A	B	B	A	A	A	B	A	B	A	B	A	A	A	B	A	A	A	B	A	A	A	A	A	B
GM10:2897891	A	A	B	B	B	B	A	A	A	B	B	B	X	A	B	B	B	A	A	B	B	B	B	B	A	B	B	A	A	A	B	A	B	A	B	A	A	A	X	A	A	A	B	A	A	X	A	A	B
GM10:2920019	A	A	B	B	B	B	A	A	A	B	B	B	B	A	B	B	B	A	A	B	B	B	B	B	A	B	B	A	A	A	B	A	B	A	B	A	A	A	X	A	A	A	B	A	A	A	A	A	B
GM10:2921288	A	A	B	B	B	B	A	A	A	B	B	B	B	A	B	B	B	A	A	B	B	X	B	B	A	B	B	A	A	A	X	A	B	A	B	A	A	A	A	A	A	A	B	A	A	X	A	A	B
GM10:3046289	A	A	B	B	B	B	A	A	A	B	B	B	B	A	B	B	B	A	A	B	B	B	B	B	A	B	B	A	A	A	B	A	B	A	B	A	A	A	X	A	A	A	B	A	A	B	A	A	B
GM10:3136834	A	A	B	B	B	B	A	A	A	B	B	B	B	A	B	B	B	A	A	B	B	B	B	B	A	B	B	A	A	A	B	A	B	A	B	A	A	A	X	A	A	A	B	A	A	A	A	A	B
GM10:3139957	A	A	B	B	B	B	A	A	A	B	B	B	B	A	B	B	B	A	A	B	B	B	B	B	A	B	B	A	A	A	B	A	B	A	B	A	A	A	X	A	A	A	B	A	A	X	A	A	B
GM10:3336438	A	A	B	B	B	B	A	A	A	B	B	B	B	A	B	B	B	A	A	B	A	B	B	B	A	B	B	A	A	A	B	A	B	A	B	A	A	A	B	A	A	A	B	A	A	A	B	A	B
GM10:3432009	B	A	B	B	B	B	A	A	A	B	B	B	B	A	B	B	B	A	A	B	A	B	B	B	A	B	B	A	A	A	B	B	B	A	B	A	B	A	A	A	A	B	B	A	A	B	B	A	B
GM10:3498625	B	A	B	B	B	B	B	A	A	B	B	B	B	A	B	B	B	A	A	B	A	B	B	B	A	B	B	A	A	A	B	B	B	A	B	A	B	A	A	A	A	B	B	A	A	B	B	A	B
GM10:3966122	X	A	B	B	B	B	B	A	A	B	B	B	B	A	B	B	B	A	A	B	A	B	B	B	A	B	B	A	A	A	B	B	B	A	B	A	B	A	A	A	A	B	B	A	A	B	B	A	B
GM10:3976904	B	A	B	B	B	X	B	X	A	B	B	B	B	A	B	B	B	A	A	B	A	B	B	B	A	B	B	A	A	A	B	B	B	A	B	A	B	A	A	A	A	B	B	A	A	X	B	A	B
GM10:3985311	B	A	B	B	B	B	B	B	A	B	B	B	B	A	B	B	B	A	A	B	A	B	B	B	A	B	B	A	A	A	B	B	B	A	B	A	B	A	A	A	A	B	B	A	A	X	B	A	B
GM10:4008060	X	A	B	B	B	A	B	X	A	B	B	B	B	A	B	B	B	A	A	B	A	B	B	B	A	B	B	A	A	A	B	B	B	A	B	A	B	A	A	A	A	B	B	A	A	X	B	A	B
GM10:4296951	X	A	B	B	B	A	B	X	A	B	B	B	B	A	B	B	B	A	A	B	A	B	B	B	A	B	B	A	A	A	B	B	B	A	B	A	B	A	A	A	A	B	B	A	A	B	X	A	B
GM10:4317455	X	A	B	B	B	A	B	X	A	B	B	B	B	A	B	B	B	A	A	B	A	B	B	B	A	B	B	A	A	A	B	B	B	A	B	A	B	A	A	A	A	B	B	A	A	X	B	A	B
GM10:4321191	X	A	B	B	B	A	B	X	A	B	B	B	B	A	B	B	B	A	A	B	A	B	B	B	B	B	B	B	A	A	B	B	B	A	B	A	B	A	A	A	A	B	B	A	A	B	B	A	B
GM10:4624770	X	A	B	B	B	B	A	B	A	B	B	B	B	A	B	B	B	A	A	B	A	B	B	B	B	B	B	B	A	A	B	B	B	A	B	A	B	A	A	A	X	B	B	A	A	A	B	A	B
GM10:4689046	X	A	B	B	B	B	A	B	A	B	B	B	B	A	B	B	B	A	B	B	A	B	B	B	B	B	B	B	A	A	B	B	B	A	B	A	B	A	A	A	X	B	B	A	A	A	B	A	B
GM10:4914971	X	A	B	B	B	B	A	X	B	B	B	B	B	A	B	B	B	A	A	B	B	B	B	B	B	B	B	B	A	A	B	B	B	A	B	A	A	B	A	A	B	B	B	A	A	A	B	A	B
GM10:5423579	X	A	B	B	B	B	A	A	B	B	B	B	B	A	B	B	B	A	A	B	B	A	B	B	B	A	X	A	A	A	B	B	B	A	B	A	A	B	A	A	B	B	B	A	A	A	B	A	B
GM10:6245066	X	A	B	B	B	B	A	A	B	A	B	B	B	A	B	B	B	A	A	A	B	A	B	B	B	A	A	A	A	A	B	B	B	A	B	A	A	B	A	A	B	B	B	A	A	A	B	A	B
GM10:6812988	B	A	B	B	B	B	B	B	B	A	B	B	B	A	B	B	B	A	A	A	B	A	B	B	B	B	A	A	B	A	B	B	B	A	B	A	B	B	A	A	B	B	B	A	A	A	B	A	B
GM10:7155530	B	A	B	B	B	B	B	B	B	A	B	B	B	A	B	B	B	A	A	A	B	A	B	B	B	B	A	A	B	A	B	B	B	A	B	A	B	B	A	A	B	B	B	A	A	A	B	A	B
GM10:7310629	B	A	B	B	B	B	B	B	B	A	B	B	B	A	B	B	B	A	A	A	B	A	B	B	B	B	A	B	B	A	B	B	B	A	X	A	B	B	A	A	B	B	B	A	A	A	B	A	B
GM10:7471661	B	A	B	B	B	B	B	B	B	A	B	B	B	A	B	B	B	A	A	A	B	A	B	B	B	X	A	A	B	A	B	B	B	A	X	A	B	B	A	A	B	B	B	A	A	A	B	A	B
GM10:8290108	B	A	B	B	B	B	B	B	B	A	B	B	B	B	A	B	B	A	A	A	B	A	B	B	B	B	A	A	B	A	B	B	B	A	B	A	B	B	A	A	B	B	B	A	A	A	B	A	B
GM10:8309523	B	A	B	B	B	B	B	B	B	A	B	B	B	B	A	B	B	A	A	A	B	A	B	B	B	B	A	A	B	A	B	B	B	A	B	A	B	B	A	A	B	B	B	A	A	A	B	A	B
GM10:8429411	B	A	B	B	B	B	B	B	B	A	B	B	B	B	A	B	B	A	A	A	B	A	B	B	B	B	A	A	B	A	B	B	B	A	B	A	B	B	A	A	B	B	B	A	A	A	B	A	B
GM10:8747537	B	A	B	B	B	B	B	B	B	A	B	B	B	B	A	B	B	A	A	A	B	A	B	B	B	B	A	A	B	A	B	B	B	A	B	A	B	B	A	A	B	B	B	A	A	A	B	A	B
GM10:9561479	B	A	B	B	B	B	B	B	B	A	B	B	B	B	A	B	B	A	A	A	B	A	B	B	B	B	A	B	B	A	B	B	B	A	B	A	B	B	A	A	B	B	B	A	A	A	B	A	B
GM10:10231650	B	A	B	B	B	B	B	B	B	A	B	B	B	B	A	B	B	A	A	A	B	A	B	B	B	B	A	A	B	A	B	B	B	A	B	A	B	B	A	A	B	B	B	A	A	A	B	A	B
GM10:10249903	B	A	B	B	B	B	B	B	B	A	B	B	B	B	A	B	B	A	A	A	B	A	B	B	B	B	A	A	B	A	B	B	B	A	B	A	B	B	A	A	B	B	B	A	A	A	B	A	B
GM10:10330369	B	A	B	B	B	B	B	B	B	A	B	B	B	B	A	B	B	A	A	A	B	A	B	B	B	B	A	A	B	A	B	B	B	A	B	A	B	B	A	A	B	B	B	A	A	A	B	A	B
GM10:12337114	B	A	B	B	B	B	B	B	B	A	B	B	B	B	A	B	B	A	A	A	B	A	B	B	B	B	A	A	B	A	B	B	B	A	B	A	B	B	A	A	B	B	B	A	A	A	B	A	B
GM10:12508887	B	A	B	B	B	B	B	B	B	A	B	B	B	B	A	B	B	A	A	A	B	A	B	B	B	B	A	A	B	A	B	B	B	A	B	A	B	B	A	A	B	B	B	A	A	A	B	A	B
GM10:12652046	B	A	B	B	B	B	B	B	B	A	B	B	B	B	A	B	B	A	A	A	B	A	B	B	B	B	A	A	B	A	B	B	B	A	B	A	B	B	A	A	B	B	B	A	A	A	B	A	B
GM10:12684779	B	A	B	B	B	B	B	B	B	A	B	B	B	B	A	B	B	A	A	A	B	A	B	B	B	B	A	A	B	A	B	B	B	A	B	A	B	B	A	A	B	B	B	A	A	A	B	A	B
GM10:12720795	B	A	B	B	B	B	B	B	B	A	B	B	B	B	A	B	B	A	A	A	B	A	B	B	B	B	A	A	B	A	B	B	B	A	B	A	B	B	A	A	B	B	B	A	A	A	B	A	B
GM10:13312596	B	A	B	B	B	B	B	B	B	A	B	B	B	B	A	B	B	A	A	A	B	A	B	B	B	B	A	A	B	A	B	B	B	A	B	A	B	B	A	A	B	B	B	A	A	A	B	A	B
GM10:13371564	B	A	B	B	B	B	B	B	B	A	B	B	B	B	A	B	B	A	A	A	B	A	B	B	B	B	A	A	B	A	B	B	B	A	B	A	B	B	A	A	B	B	B	A	A	A	B	A	B
GM10:13383901	B	A	B	B	B	B	B	B	B	A	B	B	B	B	A	B	B	A	A	A	B	A	B	B	B	B	A	B	B	A	B	B	B	A	B	A	B	B	A	A	B	B	B	A	A	A	B	A	B
GM10:13638363	B	A	B	B	B	B	B	B	B	A	B	B	B	B	A	B	B	A	A	A	B	A	B	B	B	B	A	A	B	A	B	B	B	A	B	A	B	B	A	A	B	B	B	A	A	A	B	A	B
GM10:13796095	B	A	B	B	B	B	B	B	B	A	B	B	B	B	A	B	B	A	A	A	B	A	B	B	B	B	A	B	B	A	B	B	B	A	B	A	B	B	A	A	B	B	B	A	A	A	B	A	B
GM10:13799202	B	A	B	B	B	B	B	B	B	A	B	B	B	B	A	B	B	A	A	A	B	A	B	B	B	B	A	B	B	A	B	B	B	A	B	A	B	B	A	A	B	B	B	A	A	A	B	A	B
GM10:13844520	B	A	B	B	B	B	B	B	B	A	B	B	B	B	A	B	B	A	A	A	B	A	B	B	B	B	A	B	B	A	B	B	B	A	B	A	B	B	A	A	B	B	B	A	A	A	B	A	B
GM10:13852352	B	A	B	B	B	B	B	B	B	A	B	B	B	B	A	B	B	A	A	A	B	A	B	B	B	B	A	B	B	A	B	B	B	A	B	A	B	B	A	A	B	B	B	A	A	A	B	A	B
GM10:13858511	B	A	B	B	B	B	B	B	B	A	B	B	B	B	A	B	B	A	A	A	B	A	B	B	B	B	A	B	B	A	B	B	B	A	B	A	B	B	A	A	B	B	B	A	A	A	B	B	B
GM10:13880889	B	A	B	B	B	B	B	B	B	A	B	B	B	B	A	B	B	A	A	A	B	A	B	B	B	B	A	B	B	A	B	B	B	A	B	A	B	B	A	A	B	B	B	A	A	A	B	A	B
GM10:15123932	B	A	B	B	B	B	B	B	B	A	B	B	B	B	A	B	B	A	A	A	B	A	B	B	B	B	A	B	A	A	B	B	X	A	B	A	B	B	A	A	B	B	B	A	A	A	B	A	B
GM10:15480569	B	A	B	B	B	B	B	B	B	A	B	B	B	B	A	B	B	A	A	A	B	A	B	B	B	B	A	B	B	A	B	B	B	A	B	A	B	B	A	A	B	B	B	A	A	A	B	A	B
GM10:15522637	B	A	B	B	B	B	B	B	B	A	B	B	B	B	A	B	B	A	A	A	B	A	B	B	B	B	A	B	B	A	B	B	B	A	B	A	B	B	A	A	B	B	B	A	A	A	B	A	B
GM10:16658389	B	A	B	B	B	B	B	B	B	A	B	B	B	B	A	B	B	A	A	A	B	A	B	B	B	B	A	A	B	A	B	B	B	A	B	A	B	B	A	A	B	B	B	A	A	A	B	A	B
GM10:16728192	B	A	B	B	B	B	B	B	B	A	B	B	B	B	A	B	B	A	A	A	B	A	B	B	B	B	A	B	B	A	B	B	B	A	B	A	B	B	A	A	B	B	B	A	A	A	B	A	B
GM10:16798367	B	A	B	B	B	B	B	B	B	A	B	B	B	B	A	B	B	A	A	A	B	A	B	B	B	B	A	A	B	A	B	B	B	A	B	A	B	B	A	A	B	B	B	A	A	A	B	A	B
GM10:16917624	B	A	B	B	B	B	B	B	B	A	B	B	B	B	A	B	B	A	A	A	B	A	B	B	B	B	A	B	B	A	B	B	B	A	B	A	B	B	A	A	B	B	B	A	A	A	B	A	B
GM10:17090679	B	A	B	B	B	B	B	B	B	A	B	B	B	B	A	B	B	A	A	A	B	A	B	B	B	B	A	A	B	A	B	B	B	A	B	A	B	B	A	A	B	B	B	A	A	A	B	A	B
GM10:17095849	B	A	B	B	B	B	B	B	B	A	B	B	B	B	A	B	B	A	A	A	B	A	B	B	B	B	A	B	B	A	B	B	B	A	B	A	B	B	A	A	B	B	B	A	A	A	B	A	B
GM10:17115623	B	A	B	B	B	B	B	B	B	A	B	B	B	B	A	B	B	A	A	A	B	A	B	B	B	B	A	A	B	A	B	B	B	A	B	A	B	B	A	A	B	B	B	A	A	A	B	A	B
GM10:17551488	B	A	B	B	B	B	B	B	B	A	B	B	B	B	A	B	B	A	A	A	B	A	B	B	B	B	A	B	B	A	B	B	B	A	B	A	B	B	A	A	B	B	B	A	A	A	B	A	B
GM10:17620060	B	A	B	B	B	B	B	B	B	A	B	B	B	B	A	B	B	A	A	A	B	A	B	B	B	B	A	B	B	A	B	B	B	A	B	A	B	B	A	A	B	B	B	A	A	A	B	A	B
GM10:19082192	B	A	B	B	B	B	B	B	B	A	B	B	B	B	A	B	B	A	A	A	B	A	B	B	B	B	A	B	B	A	B	B	B	A	B	A	B	B	A	A	B	B	B	A	A	A	B	A	B
GM10:19279482	B	A	B	B	B	B	B	B	B	A	B	B	B	B	A	B	B	A	A	A	B	A	B	B	B	B	A	A	B	A	B	B	B	A	B	A	B	B	A	A	B	B	B	A	A	A	B	A	B
GM10:19541464	B	A	B	B	B	B	B	B	B	A	B	B	B	B	A	B	B	A	A	A	B	A	B	B	B	B	A	B	B	A	B	B	B	A	B	A	B	B	A	A	B	B	B	A	A	A	B	A	B
GM10:20402696	B	A	B	B	B	B	B	B	B	A	B	B	B	B	A	B	B	A	A	A	B	A	B	B	B	B	A	B	B	A	B	B	B	A	B	A	B	B	A	A	B	B	B	A	A	A	B	A	B
GM10:20470304	B	A	B	B	B	B	B	B	B	A	B	B	B	B	A	B	B	A	A	A	B	A	B	B	B	B	A	B	B	A	B	B	B	A	B	B	B	B	A	A	B	B	B	A	A	A	B	A	B
GM10:20642664	B	A	B	B	B	B	B	B	B	A	B	B	B	B	A	B	B	A	A	A	B	A	B	B	B	B	A	B	B	A	B	B	B	A	B	A	B	B	A	A	B	B	B	A	A	B	B	A	B
GM10:20702941	B	A	B	B	B	B	B	B	B	A	B	B	B	B	A	B	B	A	A	A	B	A	B	B	B	B	A	B	B	A	B	B	B	A	B	A	B	B	A	A	B	B	B	A	A	X	B	A	B
GM10:20918980	B	A	B	B	B	B	B	B	B	A	B	B	B	B	A	B	B	A	A	A	B	A	B	B	B	B	A	B	B	A	B	B	B	A	B	A	B	B	A	A	B	B	B	A	A	A	B	A	B
GM10:21487798	B	A	B	B	B	B	B	B	B	A	B	B	B	B	A	B	B	A	A	A	B	A	B	B	B	B	A	A	B	A	B	B	B	A	B	A	B	B	A	A	B	B	B	A	A	A	B	A	B
GM10:22100821	B	A	B	B	B	B	B	B	B	A	B	B	B	B	A	B	B	A	A	A	B	A	B	B	B	B	A	A	B	A	B	B	B	A	B	A	B	B	A	A	B	B	B	A	A	A	B	A	B
GM10:22865918	B	A	B	B	B	B	B	B	B	A	B	B	B	B	A	B	B	A	A	A	B	A	B	B	B	B	A	B	B	A	B	B	B	A	B	A	B	B	A	A	B	B	B	A	A	A	B	A	B
GM10:26184019	B	A	B	B	B	B	B	B	B	A	B	B	B	B	A	X	B	A	A	A	B	A	B	B	B	B	A	A	B	A	B	B	B	A	B	A	B	B	A	A	B	B	B	A	A	A	B	A	B
GM10:32720644	B	A	B	B	B	B	B	B	B	A	B	B	B	B	A	A	B	A	A	A	B	A	B	B	B	B	A	X	B	A	B	B	B	A	B	A	B	B	A	A	B	B	B	A	A	A	B	A	B
GM10:32802034	B	A	B	B	B	B	B	B	B	A	B	B	B	B	A	A	B	A	A	A	B	A	B	B	B	B	A	A	B	A	B	B	B	A	B	A	B	B	A	A	B	B	B	A	A	A	B	A	B
GM10:33203625	B	A	B	B	B	B	B	B	B	A	B	B	B	B	A	A	B	A	A	A	A	A	B	B	B	B	A	A	B	A	B	B	B	A	B	A	B	B	A	A	B	B	B	A	A	A	B	A	B
GM10:33337571	B	A	B	B	B	B	B	B	B	A	B	B	B	B	A	A	B	A	A	A	B	A	B	B	B	B	A	A	B	A	B	B	B	A	B	A	B	B	A	A	B	B	B	A	A	A	B	A	B
GM10:33338694	B	A	B	B	B	B	B	B	B	A	B	B	B	B	A	A	B	A	A	A	B	A	B	B	B	B	A	A	B	A	B	B	B	A	B	A	B	B	A	A	B	B	B	A	A	A	B	A	B
GM10:33384182	B	A	B	B	B	B	B	B	B	A	B	B	B	B	A	A	B	A	A	A	B	A	B	B	B	B	A	A	B	A	B	B	B	A	B	A	B	B	A	A	B	B	B	A	A	A	B	A	B
GM10:33494692	B	A	B	B	B	B	B	B	B	A	B	B	B	B	A	A	B	A	A	A	B	A	B	B	B	B	A	B	B	A	B	B	B	A	B	A	B	B	A	A	B	B	B	A	A	A	B	A	B
GM10:33523192	B	A	B	B	B	B	B	B	B	A	B	B	B	B	A	A	B	A	A	A	B	A	B	B	B	B	A	B	B	A	B	B	B	A	B	A	B	B	A	A	B	B	B	A	A	A	B	A	B
GM10:33588640	B	A	B	B	B	B	B	B	B	A	B	B	B	B	A	A	B	A	A	A	B	A	B	B	B	B	A	A	B	A	B	B	B	A	B	A	B	B	A	A	B	B	B	A	A	A	B	A	B
GM10:33697985	B	A	B	B	B	B	B	B	B	A	B	B	B	B	A	A	B	A	A	A	B	A	B	B	B	B	A	A	B	A	B	B	B	A	B	A	B	B	A	A	B	B	B	A	A	A	B	A	B
GM10:35031062	B	A	B	B	B	B	B	B	B	A	B	B	B	B	A	A	B	A	A	A	B	A	B	B	B	B	A	B	B	A	B	B	B	A	B	A	B	B	A	A	B	B	B	A	A	A	B	A	B
GM10:35031186	B	A	B	B	B	B	B	B	B	A	B	B	B	B	A	A	B	A	A	A	B	A	B	B	B	B	A	B	B	A	B	B	B	A	B	A	B	B	A	A	B	B	B	A	A	A	B	A	B
GM10:35579829	B	A	B	B	B	B	B	B	B	A	B	B	B	B	A	A	B	A	A	A	B	A	B	B	B	B	A	B	B	A	B	B	B	A	B	A	B	B	A	A	B	B	B	A	A	A	B	A	B
GM10:35580276	B	A	B	B	B	B	B	B	B	A	B	B	B	B	A	A	B	A	A	A	B	A	B	B	B	B	A	B	B	A	B	B	B	A	B	A	B	B	A	A	B	B	B	A	A	A	B	A	B
GM10:36248608	B	A	B	B	B	B	B	B	B	A	B	B	B	B	A	A	B	A	A	A	B	A	B	B	B	B	A	B	B	A	B	B	B	A	B	A	B	B	A	A	B	B	B	A	A	A	B	A	B
GM10:36616192	B	A	B	B	B	B	B	B	B	A	B	B	B	B	A	A	B	A	A	A	B	A	B	B	B	B	A	B	B	A	B	B	B	A	B	A	B	B	A	A	B	B	B	A	A	A	B	A	B
GM10:37175667	B	A	B	B	B	B	B	B	B	A	B	B	B	B	A	A	B	A	A	A	B	A	B	B	B	B	A	B	B	A	B	B	B	A	B	A	B	B	A	A	B	B	B	A	A	A	B	A	B
GM10:37622354	B	A	B	B	B	B	B	B	B	A	B	B	B	B	A	A	B	A	A	A	B	A	B	B	B	B	B	B	B	A	B	B	B	A	B	A	B	B	A	A	B	B	B	A	A	A	B	A	B
GM10:37624664	B	A	B	B	B	B	B	B	B	A	A	B	B	B	A	A	B	A	A	A	B	A	B	B	B	B	B	B	B	A	B	B	B	A	B	A	B	B	A	A	B	B	B	A	A	A	B	A	B
GM10:37884060	B	A	B	B	B	B	B	B	B	A	A	B	B	B	A	A	B	A	A	A	B	A	B	B	A	B	B	A	B	A	B	B	B	A	B	A	B	B	A	A	B	B	B	A	A	A	B	A	B
GM10:37916823	B	A	B	B	B	B	B	B	B	A	B	B	B	B	A	A	B	A	A	A	B	A	B	B	A	B	B	A	B	A	B	B	B	A	B	A	B	B	A	A	B	B	B	A	A	A	B	A	B
GM10:38497661	B	A	B	B	B	B	B	B	B	A	B	B	B	B	A	A	B	A	A	A	A	A	B	B	A	B	B	A	A	A	B	B	B	A	B	A	B	B	A	A	B	B	B	A	A	A	B	A	B
GM10:38667699	B	A	B	B	B	B	B	B	B	A	B	B	B	B	X	A	B	A	A	B	A	A	B	B	A	B	B	A	A	A	B	B	B	A	B	A	B	B	A	A	B	B	B	A	A	A	B	A	B
GM10:38667752	B	A	B	B	B	B	B	B	B	A	B	B	B	B	X	A	B	A	A	B	A	A	B	B	A	B	B	A	A	A	B	B	B	A	B	A	B	B	A	A	B	B	B	A	A	A	B	A	B
GM10:38723798	B	A	B	B	B	B	B	B	B	A	B	B	B	B	X	A	B	A	A	B	A	A	B	B	A	B	B	A	A	A	B	B	B	A	B	A	B	B	A	A	B	B	B	A	A	A	B	A	A
GM10:38807512	B	A	B	B	B	B	B	B	B	A	B	B	B	B	X	A	B	A	A	B	A	X	B	B	A	B	B	B	A	A	B	B	B	A	B	A	B	B	A	A	B	B	B	A	A	A	B	A	A
GM10:39025321	B	A	B	B	B	A	B	B	B	A	B	B	B	B	A	A	B	A	A	B	A	A	B	B	A	B	B	A	A	A	B	B	B	A	X	A	B	B	A	A	B	B	B	A	A	A	B	A	A
GM10:39197358	B	A	B	B	B	A	B	B	B	A	B	B	B	B	A	A	B	A	A	B	A	A	B	B	A	B	B	A	A	A	B	B	B	A	B	A	B	B	A	A	B	B	B	A	A	A	B	A	A
GM10:39197502	B	A	B	B	B	A	B	B	B	A	B	B	B	B	A	A	B	A	A	B	A	A	B	B	A	B	B	A	A	A	B	B	B	A	B	A	B	B	A	A	B	B	B	A	A	A	B	A	A
GM10:39337966	B	A	B	B	B	A	B	B	B	A	B	B	B	B	A	A	B	A	A	B	A	A	B	B	A	B	B	A	A	A	B	B	B	A	B	A	B	B	A	A	B	B	B	A	A	A	B	A	A
GM10:39517046	A	A	B	B	B	A	B	B	B	A	B	B	A	B	A	B	B	A	A	B	A	A	B	B	A	B	B	A	A	A	B	B	B	A	B	A	B	B	A	A	B	B	A	A	A	A	B	A	A
GM10:39747222	A	A	B	B	B	A	B	B	B	A	B	B	A	B	A	B	B	A	A	B	A	A	B	B	A	B	B	A	A	A	B	B	B	A	B	A	B	B	A	A	B	B	A	A	A	A	B	A	A
GM10:39747348	A	A	B	B	B	A	B	B	B	A	B	B	B	B	A	X	B	A	A	B	A	A	B	B	A	B	B	A	A	A	B	B	B	A	B	A	B	B	A	A	B	B	A	A	A	A	B	A	A
GM10:40009189	A	A	B	B	B	A	B	B	B	A	B	B	A	B	X	B	B	A	A	B	A	A	B	B	A	B	B	A	A	A	B	B	B	A	B	A	B	B	A	A	B	B	A	A	A	A	B	A	A
GM10:40617459	A	A	B	B	B	B	B	B	B	A	B	B	B	B	X	A	B	A	A	B	A	A	B	B	A	B	B	A	A	A	B	B	B	A	B	A	B	B	A	A	B	B	A	A	A	A	A	A	A
GM10:41002830	A	A	B	B	B	A	B	B	B	A	B	B	B	B	B	A	B	A	A	B	A	A	B	B	A	B	B	A	A	A	B	B	B	A	B	A	B	A	B	A	B	B	A	A	A	A	A	A	A
GM10:50951831	B	A	A	B	B	A	A	A	B	A	A	B	A	B	B	B	A	B	B	A	A	B	A	A	A	A	B	B	A	A	B	B	A	B	B	B	A	A	B	A	B	B	B	B	B	B	B	B	B
GM10:51070999	B	A	A	B	B	A	A	A	B	A	A	B	A	B	B	B	A	B	B	A	X	B	A	A	A	A	B	B	A	A	B	B	A	B	B	B	A	A	B	A	B	B	B	B	B	B	X	B	B
GM11:446923	A	A	A	B	B	A	A	B	B	A	A	A	A	B	B	B	B	A	B	B	B	B	A	A	B	A	A	A	B	B	B	A	B	B	A	A	A	B	A	B	B	A	B	A	B	B	B	X	A
GM11:467613	A	A	A	B	B	A	A	B	B	A	A	A	A	B	B	B	B	A	B	B	X	B	A	A	B	A	A	A	B	B	B	A	B	B	A	A	A	X	A	B	B	A	B	A	B	B	B	X	A
GM11:601325	A	A	A	B	B	A	A	B	B	A	A	A	A	B	B	B	B	A	B	B	B	B	A	A	B	A	A	A	B	B	B	A	B	B	A	A	A	X	A	B	B	A	B	A	B	B	B	B	A
GM11:1348328	A	A	A	B	B	A	A	B	B	A	A	X	A	B	B	B	B	A	B	B	X	B	A	A	A	A	A	A	B	A	B	A	B	B	A	A	A	A	A	X	B	A	A	A	B	X	B	X	A
GM11:1672252	A	A	A	B	B	A	A	B	B	A	A	X	A	B	B	B	B	A	B	B	B	B	A	A	A	A	A	A	B	A	B	A	B	B	A	A	A	X	A	B	B	A	A	A	B	X	B	B	A
GM11:1674634	A	A	A	B	B	A	A	B	B	A	A	X	A	B	B	B	B	A	B	B	A	B	A	A	A	A	A	A	B	A	B	A	B	B	A	A	A	X	A	B	X	A	A	A	B	A	B	A	A
GM11:1705942	A	A	A	B	B	A	A	B	B	A	A	X	A	B	B	B	B	A	B	B	A	B	A	A	A	A	A	A	B	A	B	A	B	B	A	A	A	A	A	B	X	A	A	A	B	A	B	X	A
GM11:1709682	A	A	A	B	B	A	A	B	B	A	A	X	A	B	B	B	B	A	B	B	A	B	A	A	A	A	A	A	B	A	B	A	B	B	A	A	A	X	A	X	X	A	A	A	B	A	B	A	A
GM11:1726693	A	A	A	B	B	A	A	B	B	A	A	X	A	B	B	B	B	A	B	B	X	B	A	A	A	A	A	A	B	A	B	A	B	B	A	A	A	X	A	X	X	A	A	A	B	A	B	A	A
GM11:1785106	A	A	A	B	B	A	A	B	B	A	A	X	A	B	B	B	B	A	B	B	A	B	A	A	A	A	A	A	B	A	B	A	B	B	A	A	A	X	A	A	B	A	A	A	B	B	B	A	A
GM11:1968549	A	A	A	A	B	A	A	B	B	A	A	X	A	B	B	B	B	X	B	B	A	B	A	A	A	B	A	A	B	A	B	A	B	B	A	A	A	X	A	X	B	A	A	A	B	B	B	A	A
GM11:2730006	A	A	A	A	B	A	A	B	B	A	A	B	A	B	B	B	X	B	X	B	A	B	A	A	A	B	B	A	A	A	A	A	B	B	A	A	A	A	A	B	A	A	A	A	B	A	B	B	A
GM11:4204677	A	A	A	A	B	A	A	B	X	A	A	B	A	B	B	B	X	X	A	X	A	B	X	A	A	A	A	A	B	A	A	A	A	A	A	A	A	A	A	B	A	A	A	B	B	A	B	B	A
GM11:5943678	B	A	A	A	A	A	A	A	A	A	A	A	A	A	B	A	A	B	A	B	A	B	B	A	A	B	B	B	B	A	B	A	A	A	B	B	A	A	B	B	A	A	A	B	A	A	A	A	A
GM11:5952294	B	A	A	A	A	A	A	A	X	A	A	A	A	A	B	A	A	B	A	B	A	B	B	A	A	B	A	B	B	A	B	A	A	A	B	B	A	A	B	B	A	A	A	B	A	A	A	A	A
GM11:6155839	B	A	A	A	A	A	A	A	A	A	A	A	A	A	B	A	A	B	A	B	A	B	B	A	A	B	B	B	B	A	B	A	A	A	B	B	A	A	B	B	A	B	A	B	A	A	A	A	A
GM11:6180742	B	A	A	A	A	A	A	A	X	A	A	A	A	A	B	B	A	B	A	B	A	B	B	A	A	B	B	B	B	A	B	A	A	A	B	B	A	A	B	B	A	B	A	B	A	A	A	A	A
GM11:6186372	B	A	A	A	A	A	A	A	X	A	A	A	A	A	B	B	A	B	A	B	A	B	B	A	A	B	A	B	B	A	B	A	A	A	B	B	A	A	B	B	A	B	A	B	A	A	A	A	A
GM11:6191744	B	A	A	A	A	A	A	A	A	A	A	A	A	A	B	X	A	B	A	B	A	B	B	A	A	A	B	B	B	A	B	A	A	A	B	B	A	A	B	B	A	B	A	B	A	A	A	A	A
GM11:6247448	X	A	A	A	A	A	A	A	X	A	A	A	A	B	B	B	A	B	A	B	A	B	B	A	A	A	B	B	B	A	B	A	A	A	B	B	A	A	B	B	A	B	A	B	A	A	A	A	A
GM11:6324789	B	A	A	A	A	A	A	A	X	A	A	A	A	B	B	B	A	B	A	B	A	B	B	A	A	B	B	B	B	A	B	A	A	A	B	B	A	A	B	B	A	B	A	B	A	A	A	A	A
GM11:6336630	B	A	A	A	A	A	A	A	A	A	A	A	A	B	B	A	A	B	A	B	A	B	B	A	A	A	B	B	B	A	B	A	A	A	B	B	A	A	B	B	A	B	A	B	A	A	A	A	A
GM11:6381356	X	A	A	A	A	A	A	A	A	A	A	A	A	B	B	A	A	B	A	B	A	B	B	A	A	A	B	B	B	A	B	A	A	A	B	B	A	A	B	B	A	B	A	B	A	A	A	A	A
GM11:6525196	X	A	A	A	A	A	A	A	A	A	A	A	A	B	B	B	A	B	A	A	A	B	B	A	A	B	B	B	B	A	B	A	A	A	B	B	A	A	B	B	A	B	A	B	A	A	A	A	A
GM11:6601694	A	B	A	A	A	A	B	A	A	A	A	A	A	B	B	B	A	B	A	B	A	B	B	A	B	B	B	B	B	A	B	A	A	A	B	B	A	B	B	B	A	B	A	B	A	A	A	A	A
GM11:7166479	A	B	A	A	A	A	B	A	A	B	A	A	A	B	B	B	A	B	A	B	A	B	B	A	B	B	B	B	B	A	B	A	A	A	B	X	A	B	B	B	A	A	A	X	A	B	A	A	A
GM11:7325008	A	B	A	A	A	A	A	A	X	B	A	A	A	B	B	B	A	B	A	B	A	B	B	A	B	B	B	B	B	A	B	A	B	A	B	B	B	B	B	B	A	A	A	B	A	B	A	A	A
GM11:7401210	A	B	A	A	A	A	X	A	B	B	A	A	A	B	B	B	A	B	A	B	A	B	B	A	B	B	B	B	B	A	B	A	B	A	B	B	B	B	B	B	A	A	A	B	A	B	A	A	A
GM11:7434033	A	B	A	A	A	A	X	A	A	B	A	X	A	B	B	B	A	B	A	B	A	B	B	A	B	B	A	B	B	A	B	A	B	A	B	B	B	B	B	B	A	A	A	X	A	B	A	A	A
GM11:7484586	A	B	A	A	A	A	X	A	B	B	A	A	A	B	B	B	A	B	A	B	A	B	B	A	B	B	B	B	B	A	X	A	B	A	B	B	A	B	B	B	A	A	A	B	A	B	A	A	A
GM11:7594854	A	B	A	A	A	A	B	A	B	B	A	A	A	B	B	B	A	B	A	B	A	B	B	A	B	B	B	B	B	A	B	A	B	A	B	B	B	B	B	B	A	A	A	B	A	B	A	A	A
GM11:7594862	A	B	A	A	A	A	B	A	B	B	A	A	A	B	B	B	A	B	A	B	A	B	B	A	B	B	B	B	B	A	B	A	B	A	B	B	B	B	B	B	A	A	A	B	A	B	A	A	A
GM11:7652141	A	B	A	A	A	A	B	A	X	B	A	A	A	B	B	B	A	B	A	B	A	B	B	A	B	B	B	B	B	A	B	A	B	A	B	B	B	B	B	B	A	A	A	B	A	B	A	A	A
GM11:7675895	A	B	A	A	A	A	B	A	B	B	A	A	A	B	B	B	A	B	A	B	A	B	B	A	B	X	B	B	B	A	B	A	B	A	B	B	B	B	B	B	A	A	A	B	A	B	A	A	A
GM11:7754066	A	B	A	A	A	A	A	A	X	B	A	A	A	B	B	B	A	B	A	B	A	B	B	A	B	A	B	B	B	A	A	A	B	A	B	B	B	B	B	B	A	A	A	B	A	B	A	A	A
GM11:7761285	A	B	A	A	A	A	B	A	B	B	A	A	A	B	B	B	A	B	A	B	A	B	B	A	B	A	B	B	B	A	B	A	B	A	B	B	B	B	B	B	A	A	A	B	A	B	A	A	A
GM11:7781808	A	B	A	A	A	A	A	A	X	B	A	A	A	B	B	B	A	B	A	B	A	B	B	A	B	B	B	B	B	A	A	A	B	A	B	B	B	B	B	B	A	A	A	B	A	B	A	A	A
GM11:7798951	A	B	A	A	A	A	B	A	B	B	A	A	A	B	B	B	A	B	A	B	A	B	B	A	B	B	B	B	B	A	B	A	B	A	B	B	B	B	B	B	A	A	A	B	A	B	A	A	A
GM11:7799099	A	B	A	A	A	A	A	A	X	B	A	A	A	B	B	B	A	B	A	B	A	B	B	A	B	X	B	B	B	A	A	A	A	A	B	B	B	B	B	B	A	A	A	B	A	B	A	A	A
GM11:7814980	A	B	X	A	A	A	X	A	B	B	A	A	A	B	B	B	A	B	A	B	A	B	B	A	B	X	B	B	B	A	X	A	B	A	B	B	B	B	B	B	A	A	A	B	A	B	A	A	A
GM11:7861365	A	B	A	A	A	A	A	A	X	B	A	A	A	B	B	A	A	B	A	B	A	B	B	A	B	A	B	B	B	A	A	A	A	A	B	B	B	B	B	B	A	A	A	B	A	B	A	A	A
GM11:7894168	A	B	A	A	A	A	A	A	B	B	A	A	B	B	B	B	A	B	A	B	A	B	B	A	B	A	B	B	B	A	B	A	B	A	B	B	B	B	B	B	A	A	B	B	A	B	A	A	A
GM11:8011729	A	B	A	A	A	A	A	A	B	B	A	A	B	B	B	X	A	B	A	B	A	B	B	A	B	A	B	B	B	A	B	A	B	A	B	B	B	B	B	B	A	A	B	B	A	B	A	A	A
GM11:8053422	A	B	A	A	A	A	A	A	X	B	A	A	X	B	B	X	A	B	A	B	A	B	B	A	B	A	B	B	B	A	B	A	B	A	B	B	B	B	B	B	A	A	A	B	A	B	A	A	A
GM11:8150055	B	B	A	A	A	A	A	A	A	B	A	A	A	B	B	A	A	B	A	B	A	B	B	A	B	A	B	B	B	A	B	A	B	A	B	B	B	B	B	B	A	A	B	B	X	B	X	A	A
GM11:8211474	A	B	A	A	A	A	A	A	X	B	A	A	A	B	B	B	A	B	A	B	A	B	B	A	B	A	B	B	B	A	B	A	B	A	B	B	B	B	B	B	B	A	B	B	A	X	X	A	A
GM11:8957295	X	B	A	A	A	A	X	A	A	B	A	A	X	B	B	X	A	X	A	A	A	A	B	A	B	A	B	B	A	A	B	A	A	A	B	B	B	B	B	B	B	A	B	B	A	B	A	A	A
GM11:8965616	X	B	A	A	A	A	X	A	A	B	A	A	B	B	B	B	A	B	A	A	A	B	B	A	B	A	B	B	B	A	B	A	X	A	B	B	B	B	B	B	B	A	B	B	X	B	X	A	A
GM11:9043346	X	B	A	A	A	A	A	A	A	B	A	A	B	B	X	B	A	A	A	A	A	B	B	A	B	A	B	B	A	A	B	A	B	A	B	B	B	B	B	B	B	A	B	B	A	B	X	A	A
GM11:9182214	X	B	A	A	A	A	X	A	X	B	A	A	B	B	X	B	A	A	A	A	A	B	B	A	B	A	B	B	A	A	B	A	X	A	B	B	B	B	B	B	B	A	B	B	A	B	X	A	A
GM11:11752702	B	B	B	B	B	B	B	B	A	A	B	A	B	A	B	B	B	B	A	A	A	B	X	X	B	X	B	B	A	B	B	B	A	A	B	A	B	A	B	X	B	B	B	B	A	B	A	B	A
GM11:11789990	B	B	B	B	B	B	B	B	A	A	B	A	B	A	B	B	B	B	A	A	A	B	X	X	B	X	B	B	A	B	B	B	A	A	B	A	B	A	B	X	B	B	B	B	A	B	A	B	A
GM11:11790060	B	B	B	B	B	B	B	B	A	A	B	A	B	A	B	B	B	B	A	A	A	B	X	X	B	X	B	B	A	B	B	B	A	A	B	A	B	A	B	X	B	B	B	B	A	B	A	B	A
GM11:11790091	B	B	B	B	B	B	B	B	A	A	B	A	B	B	B	B	B	B	A	A	A	B	X	X	B	X	B	B	A	B	B	B	A	A	B	X	B	A	B	X	B	B	B	B	A	B	A	B	A
GM11:25020891	B	B	A	B	B	A	B	A	A	A	B	A	A	B	B	B	B	B	A	A	A	B	A	A	B	B	B	X	A	B	B	A	X	A	B	A	A	A	B	A	B	A	B	A	B	B	B	A	B
GM11:25045597	B	B	A	B	B	A	B	A	B	A	B	A	A	B	B	B	B	B	A	A	A	B	A	A	B	B	B	B	A	B	B	A	A	A	B	A	A	A	B	A	B	A	X	A	B	B	B	A	B
GM11:25116439	B	B	A	B	B	A	X	A	B	A	B	A	A	B	B	B	B	B	A	A	A	B	A	A	B	A	B	B	B	B	B	A	A	A	A	A	A	A	B	A	B	A	A	A	B	B	B	A	B
GM11:25154316	B	B	A	B	B	A	B	A	B	A	B	A	A	B	B	B	B	B	A	A	A	B	A	A	B	X	B	B	A	B	B	A	X	A	A	A	A	A	B	A	B	A	A	A	B	B	B	A	B
GM11:25196958	B	B	A	B	B	A	B	A	B	A	B	A	A	B	B	B	B	B	A	A	A	B	A	A	B	A	B	B	A	B	B	A	A	A	A	A	A	A	B	A	B	A	X	A	B	B	B	A	B
GM11:25267759	B	B	A	B	B	A	X	A	X	A	B	A	A	B	B	B	B	B	A	A	A	B	A	A	B	B	B	B	X	B	B	A	X	A	A	A	A	A	B	A	B	A	A	A	B	B	B	A	B
GM11:25422374	B	B	A	B	B	A	B	A	B	A	B	A	A	B	B	B	B	B	A	A	A	B	A	A	B	B	B	B	X	B	B	A	X	A	A	A	A	A	B	A	B	A	A	A	B	B	B	A	B
GM11:25910388	B	B	A	B	B	A	B	A	B	A	B	A	A	B	B	B	B	B	A	A	A	B	A	A	B	A	B	B	B	B	B	A	A	A	A	A	A	A	B	A	B	A	A	A	B	B	B	A	B
GM11:30969031	B	B	B	A	A	B	B	B	A	A	A	A	X	A	B	B	A	B	X	B	A	A	B	B	B	B	B	B	A	B	B	B	A	A	A	A	B	A	B	X	B	B	A	B	A	B	A	B	B
GM11:31202469	B	B	B	A	A	B	B	B	B	A	A	A	X	A	A	B	A	B	X	B	A	A	B	B	B	B	B	B	A	B	B	B	A	A	A	A	A	A	B	B	B	B	A	B	A	B	A	B	B
GM11:32366214	X	A	A	A	A	B	B	B	B	A	A	A	B	X	A	B	A	B	X	B	A	A	B	B	B	B	B	B	A	B	B	B	A	A	B	A	B	A	B	A	B	B	B	X	A	B	A	B	B
GM11:32475982	A	A	A	A	A	B	B	B	B	A	A	A	A	X	A	B	A	B	X	B	A	A	A	B	B	B	B	B	A	B	B	B	A	A	B	A	B	A	B	A	B	B	X	A	A	B	A	B	B
GM11:32493665	X	A	A	A	A	B	B	B	B	A	A	A	B	X	A	B	A	B	B	B	A	A	A	B	B	B	B	B	A	B	B	B	A	A	B	A	B	A	B	A	B	B	B	A	A	B	B	B	B
GM11:33429653	X	A	A	A	A	B	B	B	A	A	A	A	A	B	A	B	A	B	B	B	A	A	B	B	A	B	A	B	A	A	B	B	A	B	B	A	B	A	B	A	B	B	B	A	A	B	B	B	B
GM11:33765564	X	A	A	A	A	B	B	B	A	A	A	A	A	B	A	B	A	B	B	B	A	A	B	B	A	B	A	B	A	A	B	B	A	B	B	A	B	A	B	A	B	B	B	A	A	B	B	B	B
GM11:34219363	A	A	A	A	A	B	B	B	A	A	A	A	A	B	A	A	A	B	B	B	A	A	B	A	A	B	A	B	X	B	B	A	B	B	B	A	B	B	X	A	B	B	B	A	A	B	B	B	B
GM11:34245737	A	A	A	A	A	B	B	B	A	A	A	A	A	B	A	A	A	B	B	B	A	A	B	A	A	B	X	B	B	B	B	A	B	B	B	X	B	B	A	A	B	B	B	A	A	B	B	B	B
GM11:34474905	A	A	A	A	A	A	B	B	A	A	A	A	A	B	A	A	A	B	B	B	A	A	B	A	A	B	A	B	B	B	B	A	B	B	B	A	B	B	B	A	B	A	B	A	X	B	B	B	B
GM11:34477652	A	A	A	A	A	A	B	B	A	A	A	A	A	B	A	A	A	B	B	B	A	A	B	A	A	B	A	B	X	B	B	A	B	B	B	A	B	B	B	A	B	A	B	A	X	B	B	B	B
GM11:34544267	A	A	A	A	A	A	B	B	A	B	A	A	A	B	A	A	A	B	B	B	A	A	B	A	A	B	B	B	X	B	B	A	B	B	B	A	B	B	B	A	B	B	X	A	X	B	B	B	B
GM11:34564401	A	A	A	A	A	A	B	B	A	B	A	A	A	B	A	A	A	B	B	B	A	A	B	A	A	B	B	B	B	B	B	A	B	B	B	A	B	B	B	A	B	X	B	A	X	B	B	B	B
GM11:34605016	A	A	A	A	A	A	B	B	A	B	A	A	A	B	A	A	A	B	B	B	A	X	B	A	A	B	A	B	B	B	B	A	B	B	B	A	B	B	B	A	B	B	A	A	X	B	B	B	B
GM11:34623165	X	A	A	A	A	A	B	B	A	B	A	A	A	B	A	A	A	B	B	B	A	A	B	A	A	B	A	B	A	B	B	B	B	B	B	A	B	B	B	A	B	B	A	A	A	B	B	B	B
GM12:2041066	A	B	B	B	A	A	B	B	A	B	B	B	B	A	A	A	B	B	A	A	B	B	A	A	A	B	B	A	B	B	B	A	A	A	A	A	B	B	B	B	A	A	B	A	B	A	B	B	B
GM12:2086945	A	B	X	B	A	A	B	B	A	B	B	B	B	B	A	A	B	B	A	A	B	B	A	A	A	B	B	A	A	B	B	A	A	A	A	A	B	B	B	B	A	A	B	A	B	A	B	B	B
GM12:2151350	A	B	B	B	A	A	B	B	A	B	B	B	B	B	A	A	B	B	A	A	B	B	A	A	A	B	B	A	A	B	B	A	A	A	A	A	B	B	B	B	A	A	B	A	B	A	B	B	B
GM12:2155615	A	B	X	B	A	A	B	B	A	B	B	B	B	B	A	A	B	B	A	A	B	B	A	A	A	B	B	A	A	B	B	A	A	A	A	A	B	B	B	B	A	A	B	A	B	A	B	B	B
GM12:2165760	A	B	B	B	A	A	B	B	A	B	B	B	B	B	A	A	B	B	A	A	B	B	A	A	A	B	B	B	A	B	B	A	X	A	A	A	B	B	B	B	A	A	B	A	B	A	B	B	B
GM12:2165921	A	B	B	B	A	A	B	B	A	B	B	B	B	B	A	A	B	B	A	A	B	B	A	A	A	B	B	A	A	B	B	A	X	A	A	A	B	B	B	B	B	A	B	A	B	A	B	B	B
GM12:2597416	A	B	X	B	A	A	B	B	A	B	B	B	B	B	A	A	B	B	A	A	B	B	A	A	A	B	B	A	A	B	B	A	A	A	A	A	B	B	B	B	A	A	B	A	B	A	A	B	B
GM12:2762437	A	B	A	B	A	A	B	B	A	B	B	B	B	B	A	A	B	B	A	A	B	B	A	A	A	B	B	A	X	B	B	A	X	A	A	A	B	B	B	B	B	A	B	A	B	A	B	B	B
GM12:2762608	B	B	A	B	A	A	B	B	A	B	B	B	B	B	A	A	B	B	A	A	B	B	A	A	A	B	B	X	X	B	B	A	X	A	A	A	B	B	B	B	A	A	B	A	B	A	B	B	B
GM12:2819616	X	B	A	B	A	A	B	B	A	B	B	B	B	B	A	A	B	B	A	A	B	B	A	A	A	B	B	B	A	B	B	A	A	A	A	A	B	B	B	B	A	A	B	A	B	A	B	B	B
GM12:2828439	X	B	A	B	A	A	B	B	A	B	B	B	B	B	A	A	B	B	A	A	B	B	A	A	A	B	B	B	B	B	B	A	X	A	A	A	B	B	B	B	A	A	B	A	B	A	B	B	B
GM12:2847012	X	B	A	B	A	A	B	B	A	B	B	B	B	B	A	A	B	B	A	A	B	B	A	A	A	B	B	X	B	B	B	A	X	A	A	A	B	B	B	B	A	A	B	A	B	A	B	B	B
GM12:2917498	X	B	A	B	A	A	B	B	A	B	B	B	B	B	A	A	B	B	A	A	B	B	A	A	A	B	B	A	B	B	B	A	X	A	A	A	B	B	B	B	A	A	B	A	B	A	B	A	B
GM12:2974123	A	B	A	B	A	A	B	B	A	B	B	B	B	B	A	A	B	B	A	A	B	B	A	A	A	B	B	A	A	B	B	A	A	A	A	A	B	B	B	B	A	A	B	A	B	A	B	B	B
GM12:2974813	A	X	A	B	A	A	B	B	A	B	B	B	B	B	A	A	B	B	A	X	B	B	A	A	A	B	B	X	A	B	B	A	A	A	A	A	B	B	B	B	A	A	B	A	B	A	B	B	B
GM12:3242102	X	B	A	B	A	A	B	B	A	B	B	B	B	B	X	A	B	B	A	A	B	B	A	A	A	B	B	B	B	B	B	B	B	A	A	A	B	B	B	B	A	B	B	A	B	A	B	B	B
GM12:3391462	X	B	A	B	A	A	B	B	X	B	B	B	B	B	X	A	B	B	A	A	B	B	A	A	A	B	B	B	B	B	B	B	B	A	A	A	B	B	B	B	A	B	B	A	B	A	B	B	B
GM12:4019025	X	B	A	B	A	A	B	B	B	A	B	B	B	B	B	A	A	B	A	A	B	B	A	A	A	B	A	B	B	B	B	B	B	A	A	X	B	B	B	B	A	B	B	A	B	A	B	B	B
GM12:4240087	B	B	A	A	A	A	B	B	X	A	B	A	B	B	A	A	A	B	A	A	X	B	A	A	A	B	A	B	B	B	B	B	X	A	A	A	B	B	B	B	A	B	B	A	B	A	B	B	B
GM12:4361078	B	B	A	B	A	A	B	B	A	A	B	A	B	B	A	A	A	B	A	A	X	B	A	A	A	B	A	B	X	B	B	B	B	A	A	A	B	B	B	B	A	B	B	A	B	A	B	B	B
GM12:4361221	B	B	A	B	A	A	B	B	B	A	B	A	B	B	X	A	A	B	A	A	A	B	A	A	A	B	A	B	B	B	B	B	A	A	A	A	B	B	B	B	B	B	B	A	X	A	B	B	B
GM12:4479451	B	B	A	X	A	A	B	B	B	A	B	A	B	B	X	A	A	B	A	A	A	B	A	A	A	B	A	B	B	B	B	B	X	A	A	A	B	B	A	B	B	B	B	A	B	A	B	B	B
GM12:4498073	B	B	A	A	A	A	B	B	X	A	B	A	B	B	X	A	A	B	A	A	A	B	A	A	A	B	A	B	A	B	B	B	A	A	A	A	B	B	A	B	A	B	B	A	B	A	B	B	B
GM12:4503160	B	B	A	B	A	A	B	B	X	A	B	A	B	B	B	A	A	B	A	A	A	B	A	A	A	B	B	B	A	B	B	B	X	A	A	A	B	B	B	B	A	B	B	A	B	A	B	B	B
GM12:4523628	B	B	A	B	A	A	B	B	X	A	B	A	B	B	X	A	A	B	A	A	B	B	A	A	A	B	B	B	A	B	B	B	X	A	A	A	B	B	B	B	A	B	B	A	B	A	B	B	B
[truncated: 910 more rows]
[truncated: 113 more columns]

## Sheet: g. Linkage maps
QS15524 linkage map				QS15544 linkage map
[truncated: 2,747 more rows]

[truncated: 3 more sheets: h. QTL per year, i. Minor QTL regions, j. eQTL interactions]
